# Supplementary material for: Impact of mini-driver genes in the prognosis and tumor features of colorectal cancer samples: a novel perspective to support current biomarkers
Source: PeerJ. 2023 May 16;11:e15410. doi: 10.7717/peerj.15410 (PMC10198153; doi:10.7717/peerj.15410)
Supplement: Supplemental Information 2 — Table S1. Mutational profile of all evaluated genes in CRC patients Table S2. All associations between expression levels and mutational status (p < 0.05) Table S3. All associations between copy number variations and mutational status (p < 0.05) [file peerj-11-15410-s002.xlsx]

## Sheet: Table S1
Table S1. Mutational profile of all evaluated genes in CRC patients
Gene	Number of mutations	Mutated Samples	Tested Samples	Frequency	Cancer_gene OncoKB	Mutations per patient	Present
APC	939	646	980	0.659	Yes	1.45356	Highly mutated in samples (>50%)
TP53	582	551	980	0.562	Yes	1.05626	Highly mutated in samples (>50%)
TTN	952	375	842	0.445	No	2.53867	Moderately mutated in samples (11-50%)
KRAS	349	345	980	0.352	Yes	1.01159	Moderately mutated in samples (11-50%)
SYNE1	361	214	842	0.254	No	1.68692	Moderately mutated in samples (11-50%)
MUC16	357	189	842	0.224	No	1.88889	Moderately mutated in samples (11-50%)
FLG	255	186	842	0.221	No	1.37097	Moderately mutated in samples (11-50%)
PIK3CA	218	192	980	0.196	Yes	1.13542	Moderately mutated in samples (11-50%)
FAT4	218	148	842	0.176	Yes	1.47297	Moderately mutated in samples (11-50%)
MUC17	193	146	842	0.173	No	1.32192	Moderately mutated in samples (11-50%)
LRP1B	220	140	842	0.166	Yes	1.57143	Moderately mutated in samples (11-50%)
RYR1	166	135	842	0.16	No	1.22963	Moderately mutated in samples (11-50%)
BRAF	164	155	980	0.158	Yes	1.05806	Moderately mutated in samples (11-50%)
DNAH5	191	132	842	0.157	No	1.44697	Moderately mutated in samples (11-50%)
CSMD3	173	132	842	0.157	No	1.31061	Moderately mutated in samples (11-50%)
OBSCN	201	130	842	0.154	No	1.54615	Moderately mutated in samples (11-50%)
AHNAK2	173	127	842	0.151	No	1.3622	Moderately mutated in samples (11-50%)
NEB	197	125	842	0.148	No	1.576	Moderately mutated in samples (11-50%)
SDK1	135	120	842	0.143	No	1.125	Moderately mutated in samples (11-50%)
FBXW7	161	136	980	0.139	Yes	1.18382	Moderately mutated in samples (11-50%)
DMD	152	111	842	0.132	No	1.36937	Moderately mutated in samples (11-50%)
HMCN1	170	111	842	0.132	No	1.53153	Moderately mutated in samples (11-50%)
USH2A	177	110	842	0.131	No	1.60909	Moderately mutated in samples (11-50%)
RYR2	157	107	842	0.127	No	1.46729	Moderately mutated in samples (11-50%)
FAT3	148	106	842	0.126	No	1.39623	Moderately mutated in samples (11-50%)
FAT2	142	106	842	0.126	No	1.33962	Moderately mutated in samples (11-50%)
HRNR	123	105	842	0.125	No	1.17143	Moderately mutated in samples (11-50%)
PLEC	138	104	842	0.124	No	1.32692	Moderately mutated in samples (11-50%)
UBR4	126	103	842	0.122	No	1.2233	Moderately mutated in samples (11-50%)
MACF1	148	103	842	0.122	No	1.43689	Moderately mutated in samples (11-50%)
MDN1	144	102	842	0.121	No	1.41176	Moderately mutated in samples (11-50%)
AHNAK	129	102	842	0.121	No	1.26471	Moderately mutated in samples (11-50%)
LRP2	135	100	842	0.119	No	1.35	Moderately mutated in samples (11-50%)
SMAD4	129	116	980	0.118	Yes	1.11207	Moderately mutated in samples (11-50%)
ZFHX4	130	98	842	0.116	No	1.32653	Moderately mutated in samples (11-50%)
RYR3	130	98	842	0.116	No	1.32653	Moderately mutated in samples (11-50%)
DIDO1	115	97	842	0.115	No	1.18557	Moderately mutated in samples (11-50%)
CSMD1	132	97	842	0.115	No	1.36082	Moderately mutated in samples (11-50%)
COL6A3	132	96	842	0.114	No	1.375	Moderately mutated in samples (11-50%)
PCLO	138	96	842	0.114	Yes	1.4375	Moderately mutated in samples (11-50%)
PCDH17	117	95	842	0.113	No	1.23158	Moderately mutated in samples (11-50%)
RNF213	116	94	842	0.112	Yes	1.23404	Moderately mutated in samples (11-50%)
DNAH2	135	94	842	0.112	No	1.43617	Moderately mutated in samples (11-50%)
DYNC1H1	116	93	842	0.11	No	1.24731	Moderately mutated in samples (11-50%)
DNAH10	136	93	842	0.11	No	1.46237	Moderately mutated in samples (11-50%)
PCDH10	115	92	842	0.109	No	1.25	Moderately mutated in samples (11-50%)
KMT2C	127	106	980	0.108	Yes	1.19811	Moderately mutated in samples (11-50%)
MKI67	105	91	842	0.108	Yes	1.15385	Moderately mutated in samples (11-50%)
TENM1	109	90	842	0.107	No	1.21111	Moderately mutated in samples (11-50%)
EPPK1	81	66	619	0.107	No	1.22727	Moderately mutated in samples (11-50%)
TRRAP	106	90	842	0.107	Yes	1.17778	Moderately mutated in samples (11-50%)
APOB	130	90	842	0.107	No	1.44444	Moderately mutated in samples (11-50%)
ZFHX3	111	90	842	0.107	Yes	1.23333	Moderately mutated in samples (11-50%)
ANK3	127	89	842	0.106	No	1.42697	Moderately mutated in samples (11-50%)
HERC2	126	89	842	0.106	No	1.41573	Moderately mutated in samples (11-50%)
LRP1	119	89	842	0.106	No	1.33708	Moderately mutated in samples (11-50%)
SACS	135	89	842	0.106	No	1.51685	Moderately mutated in samples (11-50%)
ARID1A	101	88	842	0.105	No	1.14773	Moderately mutated in samples (11-50%)
FLG2	100	88	842	0.105	No	1.13636	Moderately mutated in samples (11-50%)
CHD4	100	87	842	0.103	Yes	1.14943	Moderately mutated in samples (11-50%)
ANK2	123	86	842	0.102	No	1.43023	Moderately mutated in samples (11-50%)
PKD1	77	63	619	0.102	No	1.22222	Moderately mutated in samples (11-50%)
SPTA1	114	86	842	0.102	No	1.32558	Moderately mutated in samples (11-50%)
FCGBP	99	85	842	0.101	No	1.16471	Moderately mutated in samples (11-50%)
DNAH9	130	84	842	0.1	No	1.54762	Lowly mutated in samples (7-10%)
CSMD2	102	84	842	0.1	No	1.21429	Lowly mutated in samples (7-10%)
PKHD1	117	84	842	0.1	No	1.39286	Lowly mutated in samples (7-10%)
RNF43	109	83	842	0.099	Yes	1.31325	Lowly mutated in samples (7-10%)
COL5A1	95	83	842	0.099	No	1.14458	Lowly mutated in samples (7-10%)
EP400	101	83	842	0.099	Yes	1.21687	Lowly mutated in samples (7-10%)
TG	97	83	842	0.099	No	1.16867	Lowly mutated in samples (7-10%)
DNAH8	120	82	842	0.097	No	1.46341	Lowly mutated in samples (7-10%)
KMT2D	117	95	980	0.097	Yes	1.23158	Lowly mutated in samples (7-10%)
ZC3H13	92	81	842	0.096	No	1.1358	Lowly mutated in samples (7-10%)
MUC5B	104	81	842	0.096	No	1.28395	Lowly mutated in samples (7-10%)
ATP10A	90	81	842	0.096	No	1.11111	Lowly mutated in samples (7-10%)
SRCAP	92	81	842	0.096	No	1.1358	Lowly mutated in samples (7-10%)
DNAH11	119	81	842	0.096	No	1.46914	Lowly mutated in samples (7-10%)
PCDH15	115	81	842	0.096	No	1.41975	Lowly mutated in samples (7-10%)
VPS13B	104	81	842	0.096	No	1.28395	Lowly mutated in samples (7-10%)
SYNE2	125	80	842	0.095	No	1.5625	Lowly mutated in samples (7-10%)
NALCN	92	80	842	0.095	No	1.15	Lowly mutated in samples (7-10%)
DNAH17	104	80	842	0.095	No	1.3	Lowly mutated in samples (7-10%)
FREM2	100	80	842	0.095	No	1.25	Lowly mutated in samples (7-10%)
CHD6	87	79	842	0.094	No	1.10127	Lowly mutated in samples (7-10%)
LAMA5	66	58	619	0.094	No	1.13793	Lowly mutated in samples (7-10%)
ABCA13	120	79	842	0.094	No	1.51899	Lowly mutated in samples (7-10%)
CUBN	94	79	842	0.094	No	1.18987	Lowly mutated in samples (7-10%)
ZNF536	90	79	842	0.094	No	1.13924	Lowly mutated in samples (7-10%)
ATM	123	92	980	0.094	Yes	1.33696	Lowly mutated in samples (7-10%)
FAT1	101	79	842	0.094	Yes	1.27848	Lowly mutated in samples (7-10%)
BSN	92	78	842	0.093	No	1.17949	Lowly mutated in samples (7-10%)
FBN2	89	78	842	0.093	No	1.14103	Lowly mutated in samples (7-10%)
ASPM	106	77	842	0.091	No	1.37662	Lowly mutated in samples (7-10%)
LAMA1	106	77	842	0.091	No	1.37662	Lowly mutated in samples (7-10%)
KIAA1109	100	77	842	0.091	No	1.2987	Lowly mutated in samples (7-10%)
AMER1	94	89	980	0.091	Yes	1.05618	Lowly mutated in samples (7-10%)
TECTA	88	77	842	0.091	No	1.14286	Lowly mutated in samples (7-10%)
RELN	102	77	842	0.091	Yes	1.32468	Lowly mutated in samples (7-10%)
COL12A1	107	76	842	0.09	No	1.40789	Lowly mutated in samples (7-10%)
DOCK2	95	76	842	0.09	No	1.25	Lowly mutated in samples (7-10%)
DNAH3	99	76	842	0.09	No	1.30263	Lowly mutated in samples (7-10%)
KALRN	83	76	842	0.09	No	1.09211	Lowly mutated in samples (7-10%)
ABCA12	106	76	842	0.09	No	1.39474	Lowly mutated in samples (7-10%)
FLNC	86	75	842	0.089	No	1.14667	Lowly mutated in samples (7-10%)
LAMA2	90	75	842	0.089	No	1.2	Lowly mutated in samples (7-10%)
GLI3	85	75	842	0.089	No	1.13333	Lowly mutated in samples (7-10%)
SRRM2	84	75	842	0.089	No	1.12	Lowly mutated in samples (7-10%)
TENM3	96	75	842	0.089	No	1.28	Lowly mutated in samples (7-10%)
DSCAM	85	74	842	0.088	No	1.14865	Lowly mutated in samples (7-10%)
TENM2	86	74	842	0.088	No	1.16216	Lowly mutated in samples (7-10%)
DCHS2	94	74	842	0.088	No	1.27027	Lowly mutated in samples (7-10%)
SLITRK5	81	74	842	0.088	No	1.09459	Lowly mutated in samples (7-10%)
HSPG2	89	74	842	0.088	No	1.2027	Lowly mutated in samples (7-10%)
FLNA	85	73	842	0.087	No	1.16438	Lowly mutated in samples (7-10%)
FN1	87	73	842	0.087	No	1.19178	Lowly mutated in samples (7-10%)
RP1L1	87	73	842	0.087	No	1.19178	Lowly mutated in samples (7-10%)
TRPS1	78	73	842	0.087	No	1.06849	Lowly mutated in samples (7-10%)
PCDH9	91	73	842	0.087	No	1.24658	Lowly mutated in samples (7-10%)
NOTCH1	73	66	757	0.087	Yes	1.10606	Lowly mutated in samples (7-10%)
PDZD2	87	72	842	0.086	No	1.20833	Lowly mutated in samples (7-10%)
WDFY3	87	72	842	0.086	No	1.20833	Lowly mutated in samples (7-10%)
DST	111	72	842	0.086	No	1.54167	Lowly mutated in samples (7-10%)
SOX9	81	72	842	0.086	Yes	1.125	Lowly mutated in samples (7-10%)
ITPR3	76	71	842	0.084	No	1.07042	Lowly mutated in samples (7-10%)
MYCBP2	97	71	842	0.084	No	1.3662	Lowly mutated in samples (7-10%)
FRY	95	71	842	0.084	No	1.33803	Lowly mutated in samples (7-10%)
FBN3	81	71	842	0.084	No	1.14085	Lowly mutated in samples (7-10%)
NRXN1	82	71	842	0.084	No	1.15493	Lowly mutated in samples (7-10%)
ACACB	79	70	842	0.083	No	1.12857	Lowly mutated in samples (7-10%)
HUWE1	80	70	842	0.083	No	1.14286	Lowly mutated in samples (7-10%)
SPEG	88	70	842	0.083	No	1.25714	Lowly mutated in samples (7-10%)
DNAH7	100	70	842	0.083	No	1.42857	Lowly mutated in samples (7-10%)
DYSF	78	70	842	0.083	No	1.11429	Lowly mutated in samples (7-10%)
UBR5	84	70	842	0.083	Yes	1.2	Lowly mutated in samples (7-10%)
MYO16	87	69	842	0.082	No	1.26087	Lowly mutated in samples (7-10%)
ACVR2A	78	69	842	0.082	Yes	1.13043	Lowly mutated in samples (7-10%)
DOCK3	85	69	842	0.082	No	1.23188	Lowly mutated in samples (7-10%)
PDE4DIP	81	69	842	0.082	Yes	1.17391	Lowly mutated in samples (7-10%)
ASH1L	83	69	842	0.082	No	1.2029	Lowly mutated in samples (7-10%)
DNAH1	88	68	842	0.081	No	1.29412	Lowly mutated in samples (7-10%)
DLC1	83	68	842	0.081	No	1.22059	Lowly mutated in samples (7-10%)
DSCAML1	80	68	842	0.081	No	1.17647	Lowly mutated in samples (7-10%)
PCDHA2	76	68	842	0.081	No	1.11765	Lowly mutated in samples (7-10%)
DCHS1	77	68	842	0.081	No	1.13235	Lowly mutated in samples (7-10%)
MXRA5	82	67	842	0.08	No	1.22388	Lowly mutated in samples (7-10%)
ADGRB3	87	67	842	0.08	No	1.29851	Lowly mutated in samples (7-10%)
MYO15A	78	67	842	0.08	No	1.16418	Lowly mutated in samples (7-10%)
LYST	84	66	842	0.078	No	1.27273	Lowly mutated in samples (7-10%)
ABCA2	53	48	619	0.078	No	1.10417	Lowly mutated in samples (7-10%)
HELZ2	52	48	619	0.078	No	1.08333	Lowly mutated in samples (7-10%)
PTPRT	76	66	842	0.078	Yes	1.15152	Lowly mutated in samples (7-10%)
CUX1	73	66	842	0.078	Yes	1.10606	Lowly mutated in samples (7-10%)
PAPPA2	74	66	842	0.078	No	1.12121	Lowly mutated in samples (7-10%)
TRPM3	70	66	842	0.078	No	1.06061	Lowly mutated in samples (7-10%)
TAF1L	76	66	842	0.078	No	1.15152	Lowly mutated in samples (7-10%)
ANKRD11	80	66	842	0.078	Yes	1.21212	Lowly mutated in samples (7-10%)
TMEM132D	74	66	842	0.078	No	1.12121	Lowly mutated in samples (7-10%)
LRRK2	81	66	842	0.078	Yes	1.22727	Lowly mutated in samples (7-10%)
VCAN	94	65	842	0.077	No	1.44615	Lowly mutated in samples (7-10%)
XIRP2	109	65	842	0.077	No	1.67692	Lowly mutated in samples (7-10%)
CELSR2	77	65	842	0.077	No	1.18462	Lowly mutated in samples (7-10%)
HECTD4	79	65	842	0.077	No	1.21538	Lowly mutated in samples (7-10%)
VWF	72	65	842	0.077	No	1.10769	Lowly mutated in samples (7-10%)
BMPR2	77	65	842	0.077	No	1.18462	Lowly mutated in samples (7-10%)
COL22A1	73	65	842	0.077	No	1.12308	Lowly mutated in samples (7-10%)
MYH11	78	65	842	0.077	Yes	1.2	Lowly mutated in samples (7-10%)
FLNB	76	64	842	0.076	No	1.1875	Lowly mutated in samples (7-10%)
NIPBL	77	64	842	0.076	No	1.20312	Lowly mutated in samples (7-10%)
CUL9	78	64	842	0.076	No	1.21875	Lowly mutated in samples (7-10%)
COL4A1	75	64	842	0.076	No	1.17188	Lowly mutated in samples (7-10%)
COL7A1	83	64	842	0.076	No	1.29688	Lowly mutated in samples (7-10%)
SZT2	73	64	842	0.076	No	1.14062	Lowly mutated in samples (7-10%)
UNC79	88	64	842	0.076	No	1.375	Lowly mutated in samples (7-10%)
MAGEC1	76	64	842	0.076	No	1.1875	Lowly mutated in samples (7-10%)
PCNT	74	64	842	0.076	No	1.15625	Lowly mutated in samples (7-10%)
PLXNA1	72	64	842	0.076	No	1.125	Lowly mutated in samples (7-10%)
SPTBN1	75	64	842	0.076	No	1.17188	Lowly mutated in samples (7-10%)
FBN1	90	64	842	0.076	No	1.40625	Lowly mutated in samples (7-10%)
ADGRV1	96	63	842	0.075	No	1.52381	Lowly mutated in samples (7-10%)
CACNA1E	76	63	842	0.075	No	1.20635	Lowly mutated in samples (7-10%)
PEG3	78	63	842	0.075	No	1.2381	Lowly mutated in samples (7-10%)
POLE	77	62	842	0.074	Yes	1.24194	Lowly mutated in samples (7-10%)
SIPA1L3	67	62	842	0.074	No	1.08065	Lowly mutated in samples (7-10%)
AKAP9	80	62	842	0.074	No	1.29032	Lowly mutated in samples (7-10%)
PCDHA3	71	62	842	0.074	No	1.14516	Lowly mutated in samples (7-10%)
CELSR1	80	62	842	0.074	No	1.29032	Lowly mutated in samples (7-10%)
ANK1	70	62	842	0.074	No	1.12903	Lowly mutated in samples (7-10%)
LPA	75	62	842	0.074	No	1.20968	Lowly mutated in samples (7-10%)
KMT2A	82	62	842	0.074	Yes	1.32258	Lowly mutated in samples (7-10%)
PTPRS	85	73	980	0.074	Yes	1.16438	Lowly mutated in samples (7-10%)
MTOR	79	71	980	0.072	Yes	1.11268	Lowly mutated in samples (7-10%)
ADAMTS2	68	61	842	0.072	No	1.11475	Lowly mutated in samples (7-10%)
FRAS1	72	61	842	0.072	No	1.18033	Lowly mutated in samples (7-10%)
TCHH	72	61	842	0.072	No	1.18033	Lowly mutated in samples (7-10%)
TNS1	64	61	842	0.072	No	1.04918	Lowly mutated in samples (7-10%)
UTRN	79	61	842	0.072	No	1.29508	Lowly mutated in samples (7-10%)
PLXNA4	79	61	842	0.072	No	1.29508	Lowly mutated in samples (7-10%)
SCN10A	77	61	842	0.072	No	1.2623	Lowly mutated in samples (7-10%)
CDH4	66	60	842	0.071	No	1.1	Lowly mutated in samples (7-10%)
COL27A1	66	60	842	0.071	No	1.1	Lowly mutated in samples (7-10%)
SPEN	81	60	842	0.071	Yes	1.35	Lowly mutated in samples (7-10%)
HECW1	64	60	842	0.071	No	1.06667	Lowly mutated in samples (7-10%)
CREBBP	81	70	980	0.071	Yes	1.15714	Lowly mutated in samples (7-10%)
PITPNM1	49	44	619	0.071	No	1.11364	Lowly mutated in samples (7-10%)
USP34	80	60	842	0.071	No	1.33333	Lowly mutated in samples (7-10%)
TRIO	73	60	842	0.071	No	1.21667	Lowly mutated in samples (7-10%)
ROBO2	70	60	842	0.071	No	1.16667	Lowly mutated in samples (7-10%)
SOGA3	71	60	842	0.071	No	1.18333	Lowly mutated in samples (7-10%)
EVC2	67	60	842	0.071	No	1.11667	Lowly mutated in samples (7-10%)
PKD1L1	75	60	842	0.071	No	1.25	Lowly mutated in samples (7-10%)
NBEA	78	60	842	0.071	No	1.3	Lowly mutated in samples (7-10%)
ZNF831	66	59	842	0.07	No	1.11864	Lowly mutated in samples (7-10%)
COL11A1	72	59	842	0.07	No	1.22034	Lowly mutated in samples (7-10%)
ABCA7	61	59	842	0.07	No	1.0339	Lowly mutated in samples (7-10%)
CELSR3	76	59	842	0.07	No	1.28814	Lowly mutated in samples (7-10%)
TRIP12	69	59	842	0.07	No	1.16949	Lowly mutated in samples (7-10%)
TIAM1	71	59	842	0.07	No	1.20339	Lowly mutated in samples (7-10%)
ROBO1	72	59	842	0.07	Yes	1.22034	Lowly mutated in samples (7-10%)
ATP2B2	62	59	842	0.07	No	1.05085	Lowly mutated in samples (7-10%)
BCORL1	70	59	842	0.07	Yes	1.18644	Lowly mutated in samples (7-10%)
TCF7L2	63	59	842	0.07	Yes	1.0678	Lowly mutated in samples (7-10%)
CIT	63	58	842	0.069	No	1.08621	Rarely mutated in samples (<7%)
UNC13C	71	58	842	0.069	No	1.22414	Rarely mutated in samples (<7%)
TRIOBP	64	58	842	0.069	No	1.10345	Rarely mutated in samples (<7%)
SCN11A	68	58	842	0.069	No	1.17241	Rarely mutated in samples (<7%)
MYO18B	70	58	842	0.069	No	1.2069	Rarely mutated in samples (<7%)
ZNF462	67	58	842	0.069	No	1.15517	Rarely mutated in samples (<7%)
PCDHA13	62	58	842	0.069	No	1.06897	Rarely mutated in samples (<7%)
AXIN2	65	58	842	0.069	Yes	1.12069	Rarely mutated in samples (<7%)
PLXNA3	66	58	842	0.069	No	1.13793	Rarely mutated in samples (<7%)
RP1	80	58	842	0.069	No	1.37931	Rarely mutated in samples (<7%)
SPTB	62	58	842	0.069	No	1.06897	Rarely mutated in samples (<7%)
NAV2	70	58	842	0.069	No	1.2069	Rarely mutated in samples (<7%)
NAV3	79	58	842	0.069	No	1.36207	Rarely mutated in samples (<7%)
MYH9	66	58	842	0.069	Yes	1.13793	Rarely mutated in samples (<7%)
NUMA1	63	58	842	0.069	Yes	1.08621	Rarely mutated in samples (<7%)
CDH8	61	57	842	0.068	No	1.07018	Rarely mutated in samples (<7%)
AFF2	66	57	842	0.068	No	1.15789	Rarely mutated in samples (<7%)
MED12L	73	57	842	0.068	No	1.2807	Rarely mutated in samples (<7%)
COL6A2	43	42	619	0.068	No	1.02381	Rarely mutated in samples (<7%)
HIVEP3	66	57	842	0.068	No	1.15789	Rarely mutated in samples (<7%)
CTNND2	63	57	842	0.068	No	1.10526	Rarely mutated in samples (<7%)
PREX1	62	57	842	0.068	No	1.08772	Rarely mutated in samples (<7%)
ADAMTS12	66	57	842	0.068	No	1.15789	Rarely mutated in samples (<7%)
SETD1A	66	57	842	0.068	Yes	1.15789	Rarely mutated in samples (<7%)
TNXB	66	57	842	0.068	No	1.15789	Rarely mutated in samples (<7%)
CHD5	64	57	842	0.068	No	1.12281	Rarely mutated in samples (<7%)
SPTBN2	66	57	842	0.068	No	1.15789	Rarely mutated in samples (<7%)
HCFC1	46	42	619	0.068	No	1.09524	Rarely mutated in samples (<7%)
FAM47C	61	56	842	0.067	No	1.08929	Rarely mutated in samples (<7%)
PRPF8	59	56	842	0.067	No	1.05357	Rarely mutated in samples (<7%)
BIRC6	83	56	842	0.067	No	1.48214	Rarely mutated in samples (<7%)
MYH7B	61	56	842	0.067	No	1.08929	Rarely mutated in samples (<7%)
ASCC3	65	56	842	0.067	No	1.16071	Rarely mutated in samples (<7%)
GCN1	65	56	842	0.067	No	1.16071	Rarely mutated in samples (<7%)
FHOD3	72	56	842	0.067	No	1.28571	Rarely mutated in samples (<7%)
USP9X	63	56	842	0.067	No	1.125	Rarely mutated in samples (<7%)
BCL9L	65	56	842	0.067	Yes	1.16071	Rarely mutated in samples (<7%)
STAB2	75	56	842	0.067	No	1.33929	Rarely mutated in samples (<7%)
CACNA1D	72	56	842	0.067	Yes	1.28571	Rarely mutated in samples (<7%)
CAD	60	56	842	0.067	Yes	1.07143	Rarely mutated in samples (<7%)
CNTN6	62	56	842	0.067	No	1.10714	Rarely mutated in samples (<7%)
LRP5	61	56	842	0.067	Yes	1.08929	Rarely mutated in samples (<7%)
PRKDC	71	56	842	0.067	Yes	1.26786	Rarely mutated in samples (<7%)
TNC	60	56	842	0.067	No	1.07143	Rarely mutated in samples (<7%)
NOS1	66	56	842	0.067	No	1.17857	Rarely mutated in samples (<7%)
IGSF10	74	55	842	0.065	No	1.34545	Rarely mutated in samples (<7%)
DMXL2	78	55	842	0.065	No	1.41818	Rarely mutated in samples (<7%)
VPS13A	76	55	842	0.065	No	1.38182	Rarely mutated in samples (<7%)
PCDHA1	61	55	842	0.065	No	1.10909	Rarely mutated in samples (<7%)
SLITRK1	62	55	842	0.065	No	1.12727	Rarely mutated in samples (<7%)
RIMS2	65	55	842	0.065	No	1.18182	Rarely mutated in samples (<7%)
CDH23	68	55	842	0.065	No	1.23636	Rarely mutated in samples (<7%)
ZFP36L2	60	55	842	0.065	No	1.09091	Rarely mutated in samples (<7%)
CPAMD8	67	55	842	0.065	No	1.21818	Rarely mutated in samples (<7%)
HYDIN	91	55	842	0.065	No	1.65455	Rarely mutated in samples (<7%)
PPL	61	55	842	0.065	No	1.10909	Rarely mutated in samples (<7%)
PTPRM	62	55	842	0.065	No	1.12727	Rarely mutated in samples (<7%)
STAB1	62	54	842	0.064	No	1.14815	Rarely mutated in samples (<7%)
LCT	61	54	842	0.064	No	1.12963	Rarely mutated in samples (<7%)
NEURL4	59	54	842	0.064	No	1.09259	Rarely mutated in samples (<7%)
PCDHA11	61	54	842	0.064	No	1.12963	Rarely mutated in samples (<7%)
VPS13D	66	54	842	0.064	No	1.22222	Rarely mutated in samples (<7%)
TNR	61	54	842	0.064	No	1.12963	Rarely mutated in samples (<7%)
IRS4	64	54	842	0.064	Yes	1.18519	Rarely mutated in samples (<7%)
ARHGEF17	64	54	842	0.064	No	1.18519	Rarely mutated in samples (<7%)
SALL1	59	54	842	0.064	No	1.09259	Rarely mutated in samples (<7%)
SCN5A	60	54	842	0.064	No	1.11111	Rarely mutated in samples (<7%)
TENM4	58	54	842	0.064	No	1.07407	Rarely mutated in samples (<7%)
MAP1B	78	54	842	0.064	No	1.44444	Rarely mutated in samples (<7%)
GALNT17	58	54	842	0.064	No	1.07407	Rarely mutated in samples (<7%)
CMYA5	76	54	842	0.064	No	1.40741	Rarely mutated in samples (<7%)
REV3L	70	54	842	0.064	No	1.2963	Rarely mutated in samples (<7%)
CDH10	64	53	842	0.063	No	1.20755	Rarely mutated in samples (<7%)
CNOT1	72	53	842	0.063	No	1.35849	Rarely mutated in samples (<7%)
NLRC5	69	53	842	0.063	No	1.30189	Rarely mutated in samples (<7%)
ABCA3	60	53	842	0.063	No	1.13208	Rarely mutated in samples (<7%)
AFF3	63	53	842	0.063	Yes	1.18868	Rarely mutated in samples (<7%)
COL6A1	42	39	619	0.063	No	1.07692	Rarely mutated in samples (<7%)
LAMA3	66	53	842	0.063	No	1.24528	Rarely mutated in samples (<7%)
SLX4	61	53	842	0.063	Yes	1.15094	Rarely mutated in samples (<7%)
COL6A6	64	53	842	0.063	No	1.20755	Rarely mutated in samples (<7%)
NCKAP5	70	53	842	0.063	No	1.32075	Rarely mutated in samples (<7%)
NPAP1	59	53	842	0.063	No	1.11321	Rarely mutated in samples (<7%)
ZNFX1	59	53	842	0.063	No	1.11321	Rarely mutated in samples (<7%)
PCDHB7	58	53	842	0.063	No	1.09434	Rarely mutated in samples (<7%)
PKHD1L1	72	53	842	0.063	No	1.35849	Rarely mutated in samples (<7%)
ARID1B	60	53	842	0.063	Yes	1.13208	Rarely mutated in samples (<7%)
TCERG1	65	53	842	0.063	No	1.22642	Rarely mutated in samples (<7%)
GPR179	69	53	842	0.063	No	1.30189	Rarely mutated in samples (<7%)
KIAA0100	56	53	842	0.063	No	1.0566	Rarely mutated in samples (<7%)
ADCY8	58	53	842	0.063	No	1.09434	Rarely mutated in samples (<7%)
KMT2B	63	53	842	0.063	Yes	1.18868	Rarely mutated in samples (<7%)
ALK	65	62	980	0.063	Yes	1.04839	Rarely mutated in samples (<7%)
ASTN1	62	53	842	0.063	No	1.16981	Rarely mutated in samples (<7%)
PLCG2	58	53	842	0.063	Yes	1.09434	Rarely mutated in samples (<7%)
LRP4	60	53	842	0.063	No	1.13208	Rarely mutated in samples (<7%)
MAP3K4	56	53	842	0.063	No	1.0566	Rarely mutated in samples (<7%)
MYH7	58	53	842	0.063	No	1.09434	Rarely mutated in samples (<7%)
CDH9	62	52	842	0.062	No	1.19231	Rarely mutated in samples (<7%)
FRYL	65	52	842	0.062	No	1.25	Rarely mutated in samples (<7%)
ADGRG4	78	52	842	0.062	No	1.5	Rarely mutated in samples (<7%)
ADAMTS5	57	52	842	0.062	No	1.09615	Rarely mutated in samples (<7%)
ASTN2	61	52	842	0.062	No	1.17308	Rarely mutated in samples (<7%)
GRIN2A	69	61	980	0.062	Yes	1.13115	Rarely mutated in samples (<7%)
DNMT1	55	52	842	0.062	Yes	1.05769	Rarely mutated in samples (<7%)
DSP	57	52	842	0.062	No	1.09615	Rarely mutated in samples (<7%)
MEGF8	59	52	842	0.062	No	1.13462	Rarely mutated in samples (<7%)
TLN2	66	52	842	0.062	No	1.26923	Rarely mutated in samples (<7%)
OTOF	60	52	842	0.062	No	1.15385	Rarely mutated in samples (<7%)
FRMD4A	57	52	842	0.062	No	1.09615	Rarely mutated in samples (<7%)
CACNA1H	56	52	842	0.062	No	1.07692	Rarely mutated in samples (<7%)
DCAF12L2	56	52	842	0.062	No	1.07692	Rarely mutated in samples (<7%)
SMARCA4	55	52	842	0.062	Yes	1.05769	Rarely mutated in samples (<7%)
ARID2	63	52	842	0.062	Yes	1.21154	Rarely mutated in samples (<7%)
PLXNA2	63	52	842	0.062	No	1.21154	Rarely mutated in samples (<7%)
MAP2	64	52	842	0.062	No	1.23077	Rarely mutated in samples (<7%)
SVIL	64	52	842	0.062	No	1.23077	Rarely mutated in samples (<7%)
PTEN	76	61	980	0.062	Yes	1.2459	Rarely mutated in samples (<7%)
MUC2	58	52	842	0.062	No	1.11538	Rarely mutated in samples (<7%)
NOTCH3	69	61	980	0.062	Yes	1.13115	Rarely mutated in samples (<7%)
CDH2	62	51	842	0.061	No	1.21569	Rarely mutated in samples (<7%)
ERICH3	65	51	842	0.061	No	1.27451	Rarely mutated in samples (<7%)
ATG2A	53	51	842	0.061	No	1.03922	Rarely mutated in samples (<7%)
ZNRF3	45	38	619	0.061	Yes	1.18421	Rarely mutated in samples (<7%)
COL1A1	54	51	842	0.061	Yes	1.05882	Rarely mutated in samples (<7%)
PTPRU	61	51	842	0.061	No	1.19608	Rarely mutated in samples (<7%)
GOLGB1	74	51	842	0.061	No	1.45098	Rarely mutated in samples (<7%)
GRID1	60	51	842	0.061	No	1.17647	Rarely mutated in samples (<7%)
PKDREJ	68	51	842	0.061	No	1.33333	Rarely mutated in samples (<7%)
GTF3C1	54	51	842	0.061	No	1.05882	Rarely mutated in samples (<7%)
FNDC1	60	51	842	0.061	No	1.17647	Rarely mutated in samples (<7%)
ZNF512B	54	51	842	0.061	No	1.05882	Rarely mutated in samples (<7%)
TRPM6	68	51	842	0.061	No	1.33333	Rarely mutated in samples (<7%)
FMN2	60	51	842	0.061	No	1.17647	Rarely mutated in samples (<7%)
RGS12	58	51	842	0.061	No	1.13725	Rarely mutated in samples (<7%)
HERC1	72	51	842	0.061	No	1.41176	Rarely mutated in samples (<7%)
CACNA1B	55	51	842	0.061	No	1.07843	Rarely mutated in samples (<7%)
PXDN	57	51	842	0.061	No	1.11765	Rarely mutated in samples (<7%)
ANKRD17	56	51	842	0.061	No	1.09804	Rarely mutated in samples (<7%)
CNTNAP2	54	51	842	0.061	No	1.05882	Rarely mutated in samples (<7%)
ABCC1	57	51	842	0.061	No	1.11765	Rarely mutated in samples (<7%)
ADAMTS16	55	51	842	0.061	No	1.07843	Rarely mutated in samples (<7%)
MYH8	65	51	842	0.061	No	1.27451	Rarely mutated in samples (<7%)
ERBB4	65	60	980	0.061	Yes	1.08333	Rarely mutated in samples (<7%)
EVPL	57	51	842	0.061	No	1.11765	Rarely mutated in samples (<7%)
PREX2	68	59	980	0.06	Yes	1.15254	Rarely mutated in samples (<7%)
ZNF845	40	37	619	0.06	No	1.08108	Rarely mutated in samples (<7%)
PIK3CG	65	59	980	0.06	Yes	1.10169	Rarely mutated in samples (<7%)
CHD3	54	50	842	0.059	No	1.08	Rarely mutated in samples (<7%)
NBEAL2	57	50	842	0.059	No	1.14	Rarely mutated in samples (<7%)
ABCA1	65	50	842	0.059	No	1.3	Rarely mutated in samples (<7%)
CSPG4	52	50	842	0.059	No	1.04	Rarely mutated in samples (<7%)
FER1L6	66	50	842	0.059	No	1.32	Rarely mutated in samples (<7%)
POLQ	60	50	842	0.059	Yes	1.2	Rarely mutated in samples (<7%)
PCDHA12	53	50	842	0.059	No	1.06	Rarely mutated in samples (<7%)
AKAP12	61	50	842	0.059	No	1.22	Rarely mutated in samples (<7%)
DSEL	62	50	842	0.059	No	1.24	Rarely mutated in samples (<7%)
EIF3A	59	50	842	0.059	No	1.18	Rarely mutated in samples (<7%)
BOC	57	50	842	0.059	No	1.14	Rarely mutated in samples (<7%)
SCN1A	60	50	842	0.059	No	1.2	Rarely mutated in samples (<7%)
SVEP1	64	50	842	0.059	No	1.28	Rarely mutated in samples (<7%)
PXDNL	57	50	842	0.059	No	1.14	Rarely mutated in samples (<7%)
ALMS1	66	50	842	0.059	No	1.32	Rarely mutated in samples (<7%)
CASZ1	52	50	842	0.059	No	1.04	Rarely mutated in samples (<7%)
VPS13C	67	50	842	0.059	No	1.34	Rarely mutated in samples (<7%)
PRRC2A	56	50	842	0.059	No	1.12	Rarely mutated in samples (<7%)
HDLBP	56	50	842	0.059	No	1.12	Rarely mutated in samples (<7%)
DUOX1	53	50	842	0.059	No	1.06	Rarely mutated in samples (<7%)
RANBP2	58	50	842	0.059	Yes	1.16	Rarely mutated in samples (<7%)
EP300	57	50	842	0.059	Yes	1.14	Rarely mutated in samples (<7%)
ERBB3	60	58	980	0.059	Yes	1.03448	Rarely mutated in samples (<7%)
FLT4	53	49	842	0.058	Yes	1.08163	Rarely mutated in samples (<7%)
SETX	60	49	842	0.058	No	1.22449	Rarely mutated in samples (<7%)
NUP205	54	49	842	0.058	No	1.10204	Rarely mutated in samples (<7%)
ABCA4	54	49	842	0.058	No	1.10204	Rarely mutated in samples (<7%)
NFASC	51	49	842	0.058	No	1.04082	Rarely mutated in samples (<7%)
CNTN1	55	49	842	0.058	No	1.12245	Rarely mutated in samples (<7%)
MGA	57	49	842	0.058	Yes	1.16327	Rarely mutated in samples (<7%)
CAMTA1	50	49	842	0.058	Yes	1.02041	Rarely mutated in samples (<7%)
DICER1	55	49	842	0.058	Yes	1.12245	Rarely mutated in samples (<7%)
CTNNB1	62	57	980	0.058	Yes	1.08772	Rarely mutated in samples (<7%)
CARD11	61	57	980	0.058	Yes	1.07018	Rarely mutated in samples (<7%)
PLXNB2	57	49	842	0.058	No	1.16327	Rarely mutated in samples (<7%)
DISP3	54	49	842	0.058	No	1.10204	Rarely mutated in samples (<7%)
SCAF4	53	49	842	0.058	No	1.08163	Rarely mutated in samples (<7%)
NYAP2	54	49	842	0.058	No	1.10204	Rarely mutated in samples (<7%)
JCAD	55	49	842	0.058	No	1.12245	Rarely mutated in samples (<7%)
TSHZ3	59	49	842	0.058	No	1.20408	Rarely mutated in samples (<7%)
SLIT2	58	49	842	0.058	No	1.18367	Rarely mutated in samples (<7%)
NCOR2	53	49	842	0.058	Yes	1.08163	Rarely mutated in samples (<7%)
TEP1	55	49	842	0.058	No	1.12245	Rarely mutated in samples (<7%)
TP53BP1	61	49	842	0.058	Yes	1.2449	Rarely mutated in samples (<7%)
KIF21A	60	49	842	0.058	No	1.22449	Rarely mutated in samples (<7%)
B2M	71	49	842	0.058	Yes	1.44898	Rarely mutated in samples (<7%)
MCM3AP	61	49	842	0.058	No	1.2449	Rarely mutated in samples (<7%)
ZNF43	57	49	842	0.058	No	1.16327	Rarely mutated in samples (<7%)
CACNA1G	52	49	842	0.058	No	1.06122	Rarely mutated in samples (<7%)
SORL1	50	49	842	0.058	No	1.02041	Rarely mutated in samples (<7%)
SPTAN1	56	49	842	0.058	No	1.14286	Rarely mutated in samples (<7%)
PCDHB5	54	49	842	0.058	No	1.10204	Rarely mutated in samples (<7%)
TIAM2	57	49	842	0.058	No	1.16327	Rarely mutated in samples (<7%)
HIVEP2	63	49	842	0.058	No	1.28571	Rarely mutated in samples (<7%)
PTPRZ1	68	49	842	0.058	No	1.38776	Rarely mutated in samples (<7%)
MYH3	68	49	842	0.058	No	1.38776	Rarely mutated in samples (<7%)
IRS1	65	56	980	0.057	Yes	1.16071	Rarely mutated in samples (<7%)
ITGB4	51	48	842	0.057	No	1.0625	Rarely mutated in samples (<7%)
JARID2	55	48	842	0.057	Yes	1.14583	Rarely mutated in samples (<7%)
GLI2	52	48	842	0.057	No	1.08333	Rarely mutated in samples (<7%)
GRM1	50	48	842	0.057	No	1.04167	Rarely mutated in samples (<7%)
SAMD9L	57	48	842	0.057	No	1.1875	Rarely mutated in samples (<7%)
SORCS1	50	48	842	0.057	No	1.04167	Rarely mutated in samples (<7%)
DGKI	51	48	842	0.057	No	1.0625	Rarely mutated in samples (<7%)
DIP2C	52	48	842	0.057	No	1.08333	Rarely mutated in samples (<7%)
THBS2	60	48	842	0.057	No	1.25	Rarely mutated in samples (<7%)
PRDM9	55	48	842	0.057	No	1.14583	Rarely mutated in samples (<7%)
SCN2A	54	48	842	0.057	No	1.125	Rarely mutated in samples (<7%)
SCN4A	59	48	842	0.057	No	1.22917	Rarely mutated in samples (<7%)
PAPPA	55	48	842	0.057	No	1.14583	Rarely mutated in samples (<7%)
SALL3	52	48	842	0.057	No	1.08333	Rarely mutated in samples (<7%)
CACNA1C	55	48	842	0.057	No	1.14583	Rarely mutated in samples (<7%)
WDR81	37	35	619	0.057	No	1.05714	Rarely mutated in samples (<7%)
CFAP65	55	48	842	0.057	No	1.14583	Rarely mutated in samples (<7%)
ZNF804B	62	48	842	0.057	No	1.29167	Rarely mutated in samples (<7%)
ZNF638	55	48	842	0.057	No	1.14583	Rarely mutated in samples (<7%)
MYH10	52	48	842	0.057	No	1.08333	Rarely mutated in samples (<7%)
NFATC2	51	48	842	0.057	Yes	1.0625	Rarely mutated in samples (<7%)
IGF2R	56	48	842	0.057	No	1.16667	Rarely mutated in samples (<7%)
MTCL1	52	47	842	0.056	No	1.10638	Rarely mutated in samples (<7%)
RIMBP2	50	47	842	0.056	No	1.06383	Rarely mutated in samples (<7%)
GRIK3	50	47	842	0.056	No	1.06383	Rarely mutated in samples (<7%)
SPAG17	64	47	842	0.056	No	1.3617	Rarely mutated in samples (<7%)
PCDHGA2	51	47	842	0.056	No	1.08511	Rarely mutated in samples (<7%)
RPTOR	50	47	842	0.056	Yes	1.06383	Rarely mutated in samples (<7%)
DCLK1	53	47	842	0.056	No	1.12766	Rarely mutated in samples (<7%)
PCDHA7	50	47	842	0.056	No	1.06383	Rarely mutated in samples (<7%)
NRXN3	53	47	842	0.056	No	1.12766	Rarely mutated in samples (<7%)
RIF1	57	47	842	0.056	No	1.21277	Rarely mutated in samples (<7%)
TPR	60	47	842	0.056	Yes	1.2766	Rarely mutated in samples (<7%)
DYNC2H1	78	47	842	0.056	No	1.65957	Rarely mutated in samples (<7%)
LRRK1	50	47	842	0.056	No	1.06383	Rarely mutated in samples (<7%)
ZNF91	54	47	842	0.056	No	1.14894	Rarely mutated in samples (<7%)
SCN9A	57	47	842	0.056	No	1.21277	Rarely mutated in samples (<7%)
TCF20	54	47	842	0.056	No	1.14894	Rarely mutated in samples (<7%)
HTT	57	47	842	0.056	No	1.21277	Rarely mutated in samples (<7%)
HIVEP1	56	47	842	0.056	No	1.19149	Rarely mutated in samples (<7%)
MYLK	57	47	842	0.056	No	1.21277	Rarely mutated in samples (<7%)
NF1	65	55	980	0.056	Yes	1.18182	Rarely mutated in samples (<7%)
MECOM	51	47	842	0.056	Yes	1.08511	Rarely mutated in samples (<7%)
ZNF318	50	47	842	0.056	No	1.06383	Rarely mutated in samples (<7%)
CDH12	49	46	842	0.055	No	1.06522	Rarely mutated in samples (<7%)
SMG1	52	46	842	0.055	Yes	1.13043	Rarely mutated in samples (<7%)
SNRNP200	50	46	842	0.055	No	1.08696	Rarely mutated in samples (<7%)
PRDM15	47	46	842	0.055	No	1.02174	Rarely mutated in samples (<7%)
ZZEF1	49	46	842	0.055	No	1.06522	Rarely mutated in samples (<7%)
LRRIQ1	64	46	842	0.055	No	1.3913	Rarely mutated in samples (<7%)
MAST2	52	46	842	0.055	No	1.13043	Rarely mutated in samples (<7%)
L1CAM	47	46	842	0.055	No	1.02174	Rarely mutated in samples (<7%)
COL4A6	56	46	842	0.055	No	1.21739	Rarely mutated in samples (<7%)
ADAMTSL3	48	46	842	0.055	No	1.04348	Rarely mutated in samples (<7%)
PCDHA5	46	46	842	0.055	No	1	Rarely mutated in samples (<7%)
TEX15	74	46	842	0.055	No	1.6087	Rarely mutated in samples (<7%)
NINL	51	46	842	0.055	No	1.1087	Rarely mutated in samples (<7%)
EPG5	59	46	842	0.055	No	1.28261	Rarely mutated in samples (<7%)
ADAMTS3	56	46	842	0.055	No	1.21739	Rarely mutated in samples (<7%)
ACAN	49	46	842	0.055	No	1.06522	Rarely mutated in samples (<7%)
PRAG1	52	46	842	0.055	No	1.13043	Rarely mutated in samples (<7%)
PRDM10	49	46	842	0.055	No	1.06522	Rarely mutated in samples (<7%)
UNC5C	52	46	842	0.055	No	1.13043	Rarely mutated in samples (<7%)
COL14A1	58	46	842	0.055	No	1.26087	Rarely mutated in samples (<7%)
ATRX	74	54	980	0.055	Yes	1.37037	Rarely mutated in samples (<7%)
NEXMIF	53	46	842	0.055	No	1.15217	Rarely mutated in samples (<7%)
ZNF208	57	46	842	0.055	No	1.23913	Rarely mutated in samples (<7%)
ITSN1	60	46	842	0.055	No	1.30435	Rarely mutated in samples (<7%)
SI	53	46	842	0.055	No	1.15217	Rarely mutated in samples (<7%)
KAT6A	55	46	842	0.055	Yes	1.19565	Rarely mutated in samples (<7%)
SMAD2	52	46	842	0.055	Yes	1.13043	Rarely mutated in samples (<7%)
UTP20	57	46	842	0.055	No	1.23913	Rarely mutated in samples (<7%)
CDH22	53	46	842	0.055	No	1.15217	Rarely mutated in samples (<7%)
MYOF	52	46	842	0.055	No	1.13043	Rarely mutated in samples (<7%)
MYO9A	63	46	842	0.055	No	1.36957	Rarely mutated in samples (<7%)
F8	66	46	842	0.055	No	1.43478	Rarely mutated in samples (<7%)
FASN	55	46	842	0.055	No	1.19565	Rarely mutated in samples (<7%)
BRCA2	82	53	980	0.054	Yes	1.54717	Rarely mutated in samples (<7%)
KIF21B	53	45	842	0.053	No	1.17778	Rarely mutated in samples (<7%)
ZNF423	50	45	842	0.053	No	1.11111	Rarely mutated in samples (<7%)
COL4A5	51	45	842	0.053	No	1.13333	Rarely mutated in samples (<7%)
SASH1	48	45	842	0.053	No	1.06667	Rarely mutated in samples (<7%)
XIRP1	48	45	842	0.053	No	1.06667	Rarely mutated in samples (<7%)
SUGP2	47	45	842	0.053	No	1.04444	Rarely mutated in samples (<7%)
GNAS	55	52	980	0.053	Yes	1.05769	Rarely mutated in samples (<7%)
ARHGAP45	33	33	619	0.053	No	1	Rarely mutated in samples (<7%)
IQGAP3	47	45	842	0.053	No	1.04444	Rarely mutated in samples (<7%)
GRIK2	55	45	842	0.053	No	1.22222	Rarely mutated in samples (<7%)
LAMC3	47	45	842	0.053	No	1.04444	Rarely mutated in samples (<7%)
KIF2B	48	45	842	0.053	No	1.06667	Rarely mutated in samples (<7%)
CTCF	46	45	842	0.053	Yes	1.02222	Rarely mutated in samples (<7%)
RAI1	52	45	842	0.053	No	1.15556	Rarely mutated in samples (<7%)
MYOM2	48	45	842	0.053	No	1.06667	Rarely mutated in samples (<7%)
PCDH19	49	45	842	0.053	No	1.08889	Rarely mutated in samples (<7%)
FRMPD1	54	45	842	0.053	No	1.2	Rarely mutated in samples (<7%)
RIMS1	52	45	842	0.053	No	1.15556	Rarely mutated in samples (<7%)
NRXN2	48	45	842	0.053	No	1.06667	Rarely mutated in samples (<7%)
AKAP6	64	45	842	0.053	No	1.42222	Rarely mutated in samples (<7%)
BRWD1	50	45	842	0.053	No	1.11111	Rarely mutated in samples (<7%)
DOCK8	56	45	842	0.053	No	1.24444	Rarely mutated in samples (<7%)
ADCY2	51	45	842	0.053	No	1.13333	Rarely mutated in samples (<7%)
ADCY9	52	45	842	0.053	No	1.15556	Rarely mutated in samples (<7%)
PCDHA9	50	45	842	0.053	No	1.11111	Rarely mutated in samples (<7%)
KIF16B	51	45	842	0.053	No	1.13333	Rarely mutated in samples (<7%)
CADPS	54	45	842	0.053	No	1.2	Rarely mutated in samples (<7%)
TULP4	51	45	842	0.053	No	1.13333	Rarely mutated in samples (<7%)
ADAMTS9	54	45	842	0.053	No	1.2	Rarely mutated in samples (<7%)
ITIH5	54	45	842	0.053	No	1.2	Rarely mutated in samples (<7%)
MYH14	47	45	842	0.053	No	1.04444	Rarely mutated in samples (<7%)
NSD2	46	45	842	0.053	Yes	1.02222	Rarely mutated in samples (<7%)
ATP4A	51	45	842	0.053	No	1.13333	Rarely mutated in samples (<7%)
NLRP4	51	45	842	0.053	No	1.13333	Rarely mutated in samples (<7%)
DAGLA	49	45	842	0.053	No	1.08889	Rarely mutated in samples (<7%)
PRDM2	52	45	842	0.053	No	1.15556	Rarely mutated in samples (<7%)
PI4KA	47	45	842	0.053	No	1.04444	Rarely mutated in samples (<7%)
SON	53	45	842	0.053	No	1.17778	Rarely mutated in samples (<7%)
FAM135B	58	45	842	0.053	No	1.28889	Rarely mutated in samples (<7%)
SIPA1L1	57	45	842	0.053	No	1.26667	Rarely mutated in samples (<7%)
SUPT6H	49	45	842	0.053	No	1.08889	Rarely mutated in samples (<7%)
AFDN	50	45	842	0.053	Yes	1.11111	Rarely mutated in samples (<7%)
MYO3A	65	45	842	0.053	No	1.44444	Rarely mutated in samples (<7%)
NBPF10	35	33	619	0.053	No	1.06061	Rarely mutated in samples (<7%)
MYO5A	50	45	842	0.053	Yes	1.11111	Rarely mutated in samples (<7%)
ERBB2	61	52	980	0.053	Yes	1.17308	Rarely mutated in samples (<7%)
HNRNPUL1	48	44	842	0.052	No	1.09091	Rarely mutated in samples (<7%)
KIAA1549L	47	44	842	0.052	No	1.06818	Rarely mutated in samples (<7%)
ITPR2	58	44	842	0.052	No	1.31818	Rarely mutated in samples (<7%)
VWA8	50	44	842	0.052	No	1.13636	Rarely mutated in samples (<7%)
ACACA	52	44	842	0.052	No	1.18182	Rarely mutated in samples (<7%)
CIC	50	44	842	0.052	Yes	1.13636	Rarely mutated in samples (<7%)
DOCK7	58	44	842	0.052	No	1.31818	Rarely mutated in samples (<7%)
TOGARAM1	53	44	842	0.052	No	1.20455	Rarely mutated in samples (<7%)
LARP4B	48	44	842	0.052	Yes	1.09091	Rarely mutated in samples (<7%)
LAMB2	45	44	842	0.052	No	1.02273	Rarely mutated in samples (<7%)
OBSL1	50	44	842	0.052	No	1.13636	Rarely mutated in samples (<7%)
PIKFYVE	51	44	842	0.052	No	1.15909	Rarely mutated in samples (<7%)
ZMYND8	53	44	842	0.052	No	1.20455	Rarely mutated in samples (<7%)
ABCA8	53	44	842	0.052	No	1.20455	Rarely mutated in samples (<7%)
DMBT1	51	44	842	0.052	No	1.15909	Rarely mutated in samples (<7%)
SLC45A4	48	44	842	0.052	No	1.09091	Rarely mutated in samples (<7%)
MAGI1	48	44	842	0.052	No	1.09091	Rarely mutated in samples (<7%)
PCDHA8	49	44	842	0.052	No	1.11364	Rarely mutated in samples (<7%)
PCDHA6	50	44	842	0.052	No	1.13636	Rarely mutated in samples (<7%)
PCDHA4	49	44	842	0.052	No	1.11364	Rarely mutated in samples (<7%)
TRIM48	32	32	619	0.052	No	1	Rarely mutated in samples (<7%)
MDC1	47	44	842	0.052	Yes	1.06818	Rarely mutated in samples (<7%)
TMEM94	47	44	842	0.052	No	1.06818	Rarely mutated in samples (<7%)
CNTNAP1	46	44	842	0.052	No	1.04545	Rarely mutated in samples (<7%)
PRUNE2	49	44	842	0.052	No	1.11364	Rarely mutated in samples (<7%)
ROS1	65	44	842	0.052	Yes	1.47727	Rarely mutated in samples (<7%)
ZFC3H1	57	44	842	0.052	No	1.29545	Rarely mutated in samples (<7%)
SCN3A	50	44	842	0.052	No	1.13636	Rarely mutated in samples (<7%)
BRWD3	58	44	842	0.052	No	1.31818	Rarely mutated in samples (<7%)
INO80	49	44	842	0.052	No	1.11364	Rarely mutated in samples (<7%)
CACNA1A	56	44	842	0.052	No	1.27273	Rarely mutated in samples (<7%)
SLC4A2	33	32	619	0.052	No	1.03125	Rarely mutated in samples (<7%)
POLR2A	50	44	842	0.052	No	1.13636	Rarely mutated in samples (<7%)
PLCE1	48	44	842	0.052	No	1.09091	Rarely mutated in samples (<7%)
NRG1	46	44	842	0.052	Yes	1.04545	Rarely mutated in samples (<7%)
ADAMTS18	50	44	842	0.052	No	1.13636	Rarely mutated in samples (<7%)
MYO10	53	44	842	0.052	No	1.20455	Rarely mutated in samples (<7%)
KDM3B	53	44	842	0.052	No	1.20455	Rarely mutated in samples (<7%)
NRAS	51	51	980	0.052	Yes	1	Rarely mutated in samples (<7%)
CENPE	54	43	842	0.051	No	1.25581	Rarely mutated in samples (<7%)
KCNMA1	47	43	842	0.051	No	1.09302	Rarely mutated in samples (<7%)
PLXND1	50	43	842	0.051	No	1.16279	Rarely mutated in samples (<7%)
EPB41L3	53	43	842	0.051	No	1.23256	Rarely mutated in samples (<7%)
ACVR1B	55	43	842	0.051	Yes	1.27907	Rarely mutated in samples (<7%)
COL3A1	44	43	842	0.051	No	1.02326	Rarely mutated in samples (<7%)
ZNF521	48	43	842	0.051	Yes	1.11628	Rarely mutated in samples (<7%)
ATP11A	46	43	842	0.051	No	1.06977	Rarely mutated in samples (<7%)
LAMA4	48	43	842	0.051	No	1.11628	Rarely mutated in samples (<7%)
LIFR	53	43	842	0.051	Yes	1.23256	Rarely mutated in samples (<7%)
MAP3K21	47	43	842	0.051	No	1.09302	Rarely mutated in samples (<7%)
GOLGA3	49	43	842	0.051	No	1.13953	Rarely mutated in samples (<7%)
GRM6	47	43	842	0.051	No	1.09302	Rarely mutated in samples (<7%)
BRINP1	46	43	842	0.051	No	1.06977	Rarely mutated in samples (<7%)
FLRT2	50	43	842	0.051	No	1.16279	Rarely mutated in samples (<7%)
KDM2B	49	43	842	0.051	Yes	1.13953	Rarely mutated in samples (<7%)
TACC2	51	43	842	0.051	No	1.18605	Rarely mutated in samples (<7%)
ARFGEF2	45	43	842	0.051	No	1.04651	Rarely mutated in samples (<7%)
RALGAPB	45	43	842	0.051	No	1.04651	Rarely mutated in samples (<7%)
PCDHGA5	43	43	842	0.051	No	1	Rarely mutated in samples (<7%)
PCDHB3	49	43	842	0.051	No	1.13953	Rarely mutated in samples (<7%)
SLC12A5	47	43	842	0.051	No	1.09302	Rarely mutated in samples (<7%)
DLGAP1	45	43	842	0.051	No	1.04651	Rarely mutated in samples (<7%)
KIAA1549	50	43	842	0.051	No	1.16279	Rarely mutated in samples (<7%)
FANCM	48	43	842	0.051	No	1.11628	Rarely mutated in samples (<7%)
KCNB2	45	43	842	0.051	No	1.04651	Rarely mutated in samples (<7%)
TAOK2	45	43	842	0.051	No	1.04651	Rarely mutated in samples (<7%)
HEATR1	49	43	842	0.051	No	1.13953	Rarely mutated in samples (<7%)
ADAMTS14	46	43	842	0.051	No	1.06977	Rarely mutated in samples (<7%)
GREB1	48	43	842	0.051	No	1.11628	Rarely mutated in samples (<7%)
FRMPD4	49	43	842	0.051	No	1.13953	Rarely mutated in samples (<7%)
TPO	45	43	842	0.051	No	1.04651	Rarely mutated in samples (<7%)
ARHGEF11	44	43	842	0.051	No	1.02326	Rarely mutated in samples (<7%)
MYO18A	46	43	842	0.051	Yes	1.06977	Rarely mutated in samples (<7%)
APBA1	45	43	842	0.051	No	1.04651	Rarely mutated in samples (<7%)
THRAP3	45	43	842	0.051	No	1.04651	Rarely mutated in samples (<7%)
RICTOR	60	50	980	0.051	Yes	1.2	Rarely mutated in samples (<7%)
ZFP64	44	43	842	0.051	No	1.02326	Rarely mutated in samples (<7%)
CPLANE1	52	43	842	0.051	No	1.2093	Rarely mutated in samples (<7%)
SBF1	55	43	842	0.051	No	1.27907	Rarely mutated in samples (<7%)
DENND2B	52	43	842	0.051	No	1.2093	Rarely mutated in samples (<7%)
NIN	52	43	842	0.051	Yes	1.2093	Rarely mutated in samples (<7%)
IFT172	47	43	842	0.051	No	1.09302	Rarely mutated in samples (<7%)
ZBTB20	47	43	842	0.051	Yes	1.09302	Rarely mutated in samples (<7%)
PTPRD	62	50	980	0.051	Yes	1.24	Rarely mutated in samples (<7%)
RNF123	46	43	842	0.051	No	1.06977	Rarely mutated in samples (<7%)
CENPF	65	42	842	0.05	No	1.54762	Rarely mutated in samples (<7%)
COL4A4	47	42	842	0.05	No	1.11905	Rarely mutated in samples (<7%)
MCF2L	48	42	842	0.05	No	1.14286	Rarely mutated in samples (<7%)
ANKRD12	49	42	842	0.05	No	1.16667	Rarely mutated in samples (<7%)
COL16A1	45	42	842	0.05	No	1.07143	Rarely mutated in samples (<7%)
GRM5	48	42	842	0.05	No	1.14286	Rarely mutated in samples (<7%)
ZBED1	46	42	842	0.05	No	1.09524	Rarely mutated in samples (<7%)
HECW2	55	42	842	0.05	No	1.30952	Rarely mutated in samples (<7%)
LRRC7	53	42	842	0.05	No	1.2619	Rarely mutated in samples (<7%)
KIAA1217	44	42	842	0.05	No	1.04762	Rarely mutated in samples (<7%)
PHIP	55	42	842	0.05	No	1.30952	Rarely mutated in samples (<7%)
SPTBN4	50	42	842	0.05	No	1.19048	Rarely mutated in samples (<7%)
PCNX2	47	42	842	0.05	No	1.11905	Rarely mutated in samples (<7%)
KIF26B	50	42	842	0.05	No	1.19048	Rarely mutated in samples (<7%)
SPG11	47	42	842	0.05	No	1.11905	Rarely mutated in samples (<7%)
DEPDC5	49	42	842	0.05	No	1.16667	Rarely mutated in samples (<7%)
TJP1	46	42	842	0.05	No	1.09524	Rarely mutated in samples (<7%)
TLL1	47	42	842	0.05	No	1.11905	Rarely mutated in samples (<7%)
DOCK4	45	42	842	0.05	No	1.07143	Rarely mutated in samples (<7%)
TPTE	51	42	842	0.05	No	1.21429	Rarely mutated in samples (<7%)
JMJD1C	45	42	842	0.05	No	1.07143	Rarely mutated in samples (<7%)
TRPC4	46	42	842	0.05	No	1.09524	Rarely mutated in samples (<7%)
DOP1B	53	42	842	0.05	No	1.2619	Rarely mutated in samples (<7%)
FAM47A	50	42	842	0.05	No	1.19048	Rarely mutated in samples (<7%)
SYNJ1	46	42	842	0.05	No	1.09524	Rarely mutated in samples (<7%)
CACNA1I	49	42	842	0.05	No	1.16667	Rarely mutated in samples (<7%)
ZNF835	42	42	842	0.05	No	1	Rarely mutated in samples (<7%)
C3	47	42	842	0.05	No	1.11905	Rarely mutated in samples (<7%)
ASXL1	51	49	980	0.05	Yes	1.04082	Rarely mutated in samples (<7%)
ZNF236	48	42	842	0.05	No	1.14286	Rarely mutated in samples (<7%)
KCNH5	49	42	842	0.05	No	1.16667	Rarely mutated in samples (<7%)
AJM1	37	31	619	0.05	No	1.19355	Rarely mutated in samples (<7%)
PLXNB1	45	42	842	0.05	No	1.07143	Rarely mutated in samples (<7%)
SETBP1	52	42	842	0.05	Yes	1.2381	Rarely mutated in samples (<7%)
GIGYF1	42	42	842	0.05	No	1	Rarely mutated in samples (<7%)
HCN1	47	42	842	0.05	No	1.11905	Rarely mutated in samples (<7%)
PTPRK	49	42	842	0.05	Yes	1.16667	Rarely mutated in samples (<7%)
MT-ND5	32	31	619	0.05	No	1.03226	Rarely mutated in samples (<7%)
RASGRF1	49	42	842	0.05	No	1.16667	Rarely mutated in samples (<7%)
MYH2	53	42	842	0.05	No	1.2619	Rarely mutated in samples (<7%)
MYH4	45	42	842	0.05	No	1.07143	Rarely mutated in samples (<7%)
LRFN5	43	42	842	0.05	No	1.02381	Rarely mutated in samples (<7%)
EPHA5	55	49	980	0.05	Yes	1.12245	Rarely mutated in samples (<7%)
NFATC1	45	42	842	0.05	No	1.07143	Rarely mutated in samples (<7%)
PNPLA7	47	42	842	0.05	No	1.11905	Rarely mutated in samples (<7%)
NHS	48	42	842	0.05	No	1.14286	Rarely mutated in samples (<7%)
NID1	46	42	842	0.05	No	1.09524	Rarely mutated in samples (<7%)
ROR2	49	42	842	0.05	No	1.16667	Rarely mutated in samples (<7%)
INSRR	45	41	842	0.049	No	1.09756	Rarely mutated in samples (<7%)
CDH11	41	41	842	0.049	Yes	1	Rarely mutated in samples (<7%)
MON2	46	41	842	0.049	No	1.12195	Rarely mutated in samples (<7%)
ZNF609	43	41	842	0.049	No	1.04878	Rarely mutated in samples (<7%)
KCNA4	44	41	842	0.049	No	1.07317	Rarely mutated in samples (<7%)
CHD1	47	41	842	0.049	No	1.14634	Rarely mutated in samples (<7%)
ZC3H4	46	41	842	0.049	No	1.12195	Rarely mutated in samples (<7%)
AKAP13	46	41	842	0.049	No	1.12195	Rarely mutated in samples (<7%)
COL5A2	46	41	842	0.049	No	1.12195	Rarely mutated in samples (<7%)
KANSL1	45	41	842	0.049	No	1.09756	Rarely mutated in samples (<7%)
DNAJC13	48	41	842	0.049	No	1.17073	Rarely mutated in samples (<7%)
ATP9A	44	41	842	0.049	No	1.07317	Rarely mutated in samples (<7%)
ABCC9	46	41	842	0.049	No	1.12195	Rarely mutated in samples (<7%)
GRIN2B	44	41	842	0.049	No	1.07317	Rarely mutated in samples (<7%)
DMXL1	53	41	842	0.049	No	1.29268	Rarely mutated in samples (<7%)
UNC13B	41	41	842	0.049	No	1	Rarely mutated in samples (<7%)
PCDHGB3	45	41	842	0.049	No	1.09756	Rarely mutated in samples (<7%)
PCDHB8	46	41	842	0.049	No	1.12195	Rarely mutated in samples (<7%)
PCDHB12	44	41	842	0.049	No	1.07317	Rarely mutated in samples (<7%)
LMTK2	48	41	842	0.049	No	1.17073	Rarely mutated in samples (<7%)
PHRF1	42	41	842	0.049	No	1.02439	Rarely mutated in samples (<7%)
ZDBF2	66	41	842	0.049	No	1.60976	Rarely mutated in samples (<7%)
RIPOR1	43	41	842	0.049	No	1.04878	Rarely mutated in samples (<7%)
TRPM2	42	41	842	0.049	No	1.02439	Rarely mutated in samples (<7%)
MRC2	41	41	842	0.049	No	1	Rarely mutated in samples (<7%)
UGGT2	46	41	842	0.049	No	1.12195	Rarely mutated in samples (<7%)
SEMA5B	43	41	842	0.049	No	1.04878	Rarely mutated in samples (<7%)
GBF1	42	41	842	0.049	No	1.02439	Rarely mutated in samples (<7%)
ZAN	50	41	842	0.049	No	1.21951	Rarely mutated in samples (<7%)
WNK4	46	41	842	0.049	No	1.12195	Rarely mutated in samples (<7%)
WWC3	42	41	842	0.049	No	1.02439	Rarely mutated in samples (<7%)
SYNGAP1	47	41	842	0.049	No	1.14634	Rarely mutated in samples (<7%)
SYNJ2	43	41	842	0.049	No	1.04878	Rarely mutated in samples (<7%)
TRERF1	43	41	842	0.049	No	1.04878	Rarely mutated in samples (<7%)
BRINP3	47	41	842	0.049	No	1.14634	Rarely mutated in samples (<7%)
SPATA31D1	43	41	842	0.049	No	1.04878	Rarely mutated in samples (<7%)
SPEF2	45	41	842	0.049	No	1.09756	Rarely mutated in samples (<7%)
TRPA1	48	41	842	0.049	No	1.17073	Rarely mutated in samples (<7%)
RBFOX1	44	41	842	0.049	No	1.07317	Rarely mutated in samples (<7%)
SLIT3	44	41	842	0.049	No	1.07317	Rarely mutated in samples (<7%)
MIA3	52	41	842	0.049	No	1.26829	Rarely mutated in samples (<7%)
PLCB4	43	41	842	0.049	No	1.04878	Rarely mutated in samples (<7%)
SSTR4	49	41	842	0.049	No	1.19512	Rarely mutated in samples (<7%)
CDKL5	45	41	842	0.049	No	1.09756	Rarely mutated in samples (<7%)
MUC6	44	41	842	0.049	No	1.07317	Rarely mutated in samples (<7%)
RBP3	46	41	842	0.049	No	1.12195	Rarely mutated in samples (<7%)
MYH6	58	41	842	0.049	No	1.41463	Rarely mutated in samples (<7%)
CDK12	47	41	842	0.049	Yes	1.14634	Rarely mutated in samples (<7%)
NOTCH4	51	48	980	0.049	Yes	1.0625	Rarely mutated in samples (<7%)
IGSF1	46	41	842	0.049	No	1.12195	Rarely mutated in samples (<7%)
PTPN21	47	40	842	0.048	No	1.175	Rarely mutated in samples (<7%)
KCNH2	43	40	842	0.048	No	1.075	Rarely mutated in samples (<7%)
KNDC1	44	40	842	0.048	No	1.1	Rarely mutated in samples (<7%)
ABCC2	44	40	842	0.048	No	1.1	Rarely mutated in samples (<7%)
COL1A2	44	40	842	0.048	No	1.1	Rarely mutated in samples (<7%)
SHANK1	44	40	842	0.048	No	1.1	Rarely mutated in samples (<7%)
ADGRL3	48	40	842	0.048	No	1.2	Rarely mutated in samples (<7%)
KATNIP	45	40	842	0.048	No	1.125	Rarely mutated in samples (<7%)
CR1	42	40	842	0.048	No	1.05	Rarely mutated in samples (<7%)
NUP188	43	40	842	0.048	No	1.075	Rarely mutated in samples (<7%)
PATJ	44	40	842	0.048	No	1.1	Rarely mutated in samples (<7%)
GRID2	41	40	842	0.048	No	1.025	Rarely mutated in samples (<7%)
CCDC180	45	40	842	0.048	No	1.125	Rarely mutated in samples (<7%)
DCC	52	40	842	0.048	No	1.3	Rarely mutated in samples (<7%)
GUCY2F	45	40	842	0.048	No	1.125	Rarely mutated in samples (<7%)
MDGA2	42	40	842	0.048	No	1.05	Rarely mutated in samples (<7%)
SLC12A7	35	30	619	0.048	No	1.16667	Rarely mutated in samples (<7%)
OSBPL6	40	40	842	0.048	No	1	Rarely mutated in samples (<7%)
DLG5	43	40	842	0.048	No	1.075	Rarely mutated in samples (<7%)
TSPOAP1	45	40	842	0.048	No	1.125	Rarely mutated in samples (<7%)
RNF17	48	40	842	0.048	No	1.2	Rarely mutated in samples (<7%)
MAST1	44	40	842	0.048	No	1.1	Rarely mutated in samples (<7%)
TDRD6	50	40	842	0.048	No	1.25	Rarely mutated in samples (<7%)
TRIP11	47	40	842	0.048	Yes	1.175	Rarely mutated in samples (<7%)
YLPM1	44	40	842	0.048	No	1.1	Rarely mutated in samples (<7%)
ADAMTS20	42	40	842	0.048	No	1.05	Rarely mutated in samples (<7%)
KSR2	44	40	842	0.048	Yes	1.1	Rarely mutated in samples (<7%)
CTC1	32	30	619	0.048	No	1.06667	Rarely mutated in samples (<7%)
WDR33	43	40	842	0.048	No	1.075	Rarely mutated in samples (<7%)
SPHKAP	46	40	842	0.048	No	1.15	Rarely mutated in samples (<7%)
ZNF516	45	40	842	0.048	No	1.125	Rarely mutated in samples (<7%)
TIE1	45	40	842	0.048	No	1.125	Rarely mutated in samples (<7%)
ADCY5	41	40	842	0.048	No	1.025	Rarely mutated in samples (<7%)
BMS1	44	40	842	0.048	No	1.1	Rarely mutated in samples (<7%)
MADD	47	40	842	0.048	No	1.175	Rarely mutated in samples (<7%)
SHKBP1	40	40	842	0.048	No	1	Rarely mutated in samples (<7%)
CDK5RAP2	46	40	842	0.048	No	1.15	Rarely mutated in samples (<7%)
CCDC88A	48	40	842	0.048	No	1.2	Rarely mutated in samples (<7%)
WNK3	44	40	842	0.048	No	1.1	Rarely mutated in samples (<7%)
COL24A1	44	40	842	0.048	No	1.1	Rarely mutated in samples (<7%)
KMT2E	51	40	842	0.048	No	1.275	Rarely mutated in samples (<7%)
FILIP1	46	40	842	0.048	No	1.15	Rarely mutated in samples (<7%)
PCDH8	43	40	842	0.048	No	1.075	Rarely mutated in samples (<7%)
FREM1	49	40	842	0.048	No	1.225	Rarely mutated in samples (<7%)
BCOR	42	40	842	0.048	Yes	1.05	Rarely mutated in samples (<7%)
AHDC1	46	40	842	0.048	No	1.15	Rarely mutated in samples (<7%)
LTBP2	48	40	842	0.048	No	1.2	Rarely mutated in samples (<7%)
ABCC8	47	40	842	0.048	No	1.175	Rarely mutated in samples (<7%)
TAF1	48	40	842	0.048	Yes	1.2	Rarely mutated in samples (<7%)
TAF4	41	40	842	0.048	No	1.025	Rarely mutated in samples (<7%)
PRKD1	45	40	842	0.048	Yes	1.125	Rarely mutated in samples (<7%)
PTPRC	50	40	842	0.048	Yes	1.25	Rarely mutated in samples (<7%)
SRRT	43	40	842	0.048	No	1.075	Rarely mutated in samples (<7%)
KDM5A	48	40	842	0.048	Yes	1.2	Rarely mutated in samples (<7%)
RASGRF2	47	40	842	0.048	No	1.175	Rarely mutated in samples (<7%)
MYT1	44	40	842	0.048	No	1.1	Rarely mutated in samples (<7%)
F5	58	40	842	0.048	No	1.45	Rarely mutated in samples (<7%)
INPPL1	42	39	842	0.046	Yes	1.07692	Rarely mutated in samples (<7%)
FLT1	51	45	980	0.046	Yes	1.13333	Rarely mutated in samples (<7%)
CNTN4	41	39	842	0.046	No	1.05128	Rarely mutated in samples (<7%)
PDZRN3	43	39	842	0.046	No	1.10256	Rarely mutated in samples (<7%)
ZNF335	43	39	842	0.046	No	1.10256	Rarely mutated in samples (<7%)
ITPR1	51	39	842	0.046	No	1.30769	Rarely mutated in samples (<7%)
KCND3	40	39	842	0.046	No	1.02564	Rarely mutated in samples (<7%)
HECTD1	45	39	842	0.046	No	1.15385	Rarely mutated in samples (<7%)
FBXL7	40	39	842	0.046	No	1.02564	Rarely mutated in samples (<7%)
AGAP1	43	39	842	0.046	No	1.10256	Rarely mutated in samples (<7%)
CAMSAP2	43	39	842	0.046	No	1.10256	Rarely mutated in samples (<7%)
SYCP2	51	39	842	0.046	No	1.30769	Rarely mutated in samples (<7%)
GRM3	42	39	842	0.046	Yes	1.07692	Rarely mutated in samples (<7%)
ARFGEF1	46	39	842	0.046	No	1.17949	Rarely mutated in samples (<7%)
DPYD	45	39	842	0.046	No	1.15385	Rarely mutated in samples (<7%)
ATN1	43	39	842	0.046	No	1.10256	Rarely mutated in samples (<7%)
ZC3H18	43	39	842	0.046	No	1.10256	Rarely mutated in samples (<7%)
NYNRIN	44	39	842	0.046	No	1.12821	Rarely mutated in samples (<7%)
SIPA1L2	48	39	842	0.046	No	1.23077	Rarely mutated in samples (<7%)
DENND3	40	39	842	0.046	No	1.02564	Rarely mutated in samples (<7%)
PCDHA10	42	39	842	0.046	No	1.07692	Rarely mutated in samples (<7%)
PCDHB2	41	39	842	0.046	No	1.05128	Rarely mutated in samples (<7%)
NUP214	46	39	842	0.046	Yes	1.17949	Rarely mutated in samples (<7%)
DOCK11	45	39	842	0.046	No	1.15385	Rarely mutated in samples (<7%)
PCDHB16	42	39	842	0.046	No	1.07692	Rarely mutated in samples (<7%)
CHD9	50	39	842	0.046	No	1.28205	Rarely mutated in samples (<7%)
ADAMTS1	43	39	842	0.046	No	1.10256	Rarely mutated in samples (<7%)
SLC32A1	41	39	842	0.046	No	1.05128	Rarely mutated in samples (<7%)
KIF20B	53	39	842	0.046	No	1.35897	Rarely mutated in samples (<7%)
MARF1	40	39	842	0.046	No	1.02564	Rarely mutated in samples (<7%)
TLN1	39	39	842	0.046	No	1	Rarely mutated in samples (<7%)
DOCK10	44	39	842	0.046	No	1.12821	Rarely mutated in samples (<7%)
SEC16A	41	39	842	0.046	No	1.05128	Rarely mutated in samples (<7%)
CHD7	43	39	842	0.046	No	1.10256	Rarely mutated in samples (<7%)
EIF4G3	42	39	842	0.046	No	1.07692	Rarely mutated in samples (<7%)
COL18A1	42	39	842	0.046	No	1.07692	Rarely mutated in samples (<7%)
ABCC3	40	39	842	0.046	No	1.02564	Rarely mutated in samples (<7%)
THSD7B	47	39	842	0.046	No	1.20513	Rarely mutated in samples (<7%)
MPDZ	46	39	842	0.046	No	1.17949	Rarely mutated in samples (<7%)
XDH	43	39	842	0.046	No	1.10256	Rarely mutated in samples (<7%)
IQGAP1	43	39	842	0.046	No	1.10256	Rarely mutated in samples (<7%)
ATR	51	39	842	0.046	Yes	1.30769	Rarely mutated in samples (<7%)
KIF1A	40	39	842	0.046	No	1.02564	Rarely mutated in samples (<7%)
SDK2	41	39	842	0.046	No	1.05128	Rarely mutated in samples (<7%)
RREB1	43	39	842	0.046	No	1.10256	Rarely mutated in samples (<7%)
BCL9	46	39	842	0.046	Yes	1.17949	Rarely mutated in samples (<7%)
THSD7A	43	39	842	0.046	No	1.10256	Rarely mutated in samples (<7%)
NOD2	45	39	842	0.046	No	1.15385	Rarely mutated in samples (<7%)
PCSK5	41	39	842	0.046	No	1.05128	Rarely mutated in samples (<7%)
CASP8	42	39	842	0.046	Yes	1.07692	Rarely mutated in samples (<7%)
SYTL2	46	39	842	0.046	No	1.17949	Rarely mutated in samples (<7%)
NSD1	49	39	842	0.046	Yes	1.25641	Rarely mutated in samples (<7%)
PLCB3	41	39	842	0.046	No	1.05128	Rarely mutated in samples (<7%)
LTBP1	42	39	842	0.046	No	1.07692	Rarely mutated in samples (<7%)
PDZRN4	45	39	842	0.046	No	1.15385	Rarely mutated in samples (<7%)
PCDHGA12	41	39	842	0.046	No	1.05128	Rarely mutated in samples (<7%)
POLD1	42	39	842	0.046	Yes	1.07692	Rarely mutated in samples (<7%)
TRPM1	45	39	842	0.046	No	1.15385	Rarely mutated in samples (<7%)
MYO1B	43	39	842	0.046	No	1.10256	Rarely mutated in samples (<7%)
MYO1F	42	39	842	0.046	No	1.07692	Rarely mutated in samples (<7%)
MUC4	45	39	842	0.046	No	1.15385	Rarely mutated in samples (<7%)
MYO9B	44	39	842	0.046	No	1.12821	Rarely mutated in samples (<7%)
ERCC6	44	39	842	0.046	No	1.12821	Rarely mutated in samples (<7%)
ATP8A2	49	39	842	0.046	No	1.25641	Rarely mutated in samples (<7%)
AGRN	43	39	842	0.046	No	1.10256	Rarely mutated in samples (<7%)
A2M	41	38	842	0.045	No	1.07895	Rarely mutated in samples (<7%)
CDH18	41	38	842	0.045	No	1.07895	Rarely mutated in samples (<7%)
MYT1L	45	38	842	0.045	No	1.18421	Rarely mutated in samples (<7%)
PPRC1	40	38	842	0.045	No	1.05263	Rarely mutated in samples (<7%)
KCNQ3	40	38	842	0.045	No	1.05263	Rarely mutated in samples (<7%)
NISCH	40	38	842	0.045	No	1.05263	Rarely mutated in samples (<7%)
TANC1	42	38	842	0.045	No	1.10526	Rarely mutated in samples (<7%)
PSME4	43	38	842	0.045	No	1.13158	Rarely mutated in samples (<7%)
CLTC	41	38	842	0.045	Yes	1.07895	Rarely mutated in samples (<7%)
COL4A2	50	38	842	0.045	No	1.31579	Rarely mutated in samples (<7%)
COL2A1	40	38	842	0.045	Yes	1.05263	Rarely mutated in samples (<7%)
PTPN23	39	38	842	0.045	No	1.02632	Rarely mutated in samples (<7%)
C2ORF16	54	38	842	0.045	No	1.42105	Rarely mutated in samples (<7%)
POLR1A	42	38	842	0.045	No	1.10526	Rarely mutated in samples (<7%)
LIMK1	39	38	842	0.045	No	1.02632	Rarely mutated in samples (<7%)
CTNNA2	39	38	842	0.045	No	1.02632	Rarely mutated in samples (<7%)
PHF3	48	38	842	0.045	No	1.26316	Rarely mutated in samples (<7%)
FARP1	42	38	842	0.045	No	1.10526	Rarely mutated in samples (<7%)
DAPK1	42	38	842	0.045	No	1.10526	Rarely mutated in samples (<7%)
SLITRK2	41	38	842	0.045	No	1.07895	Rarely mutated in samples (<7%)
IPO8	40	38	842	0.045	No	1.05263	Rarely mutated in samples (<7%)
DLGAP3	38	38	842	0.045	No	1	Rarely mutated in samples (<7%)
ATP8B2	48	38	842	0.045	No	1.26316	Rarely mutated in samples (<7%)
ABCC12	41	38	842	0.045	No	1.07895	Rarely mutated in samples (<7%)
PCDHGA7	42	38	842	0.045	No	1.10526	Rarely mutated in samples (<7%)
PCDHGA3	38	38	842	0.045	No	1	Rarely mutated in samples (<7%)
DISP1	44	38	842	0.045	No	1.15789	Rarely mutated in samples (<7%)
PLEKHA6	44	38	842	0.045	No	1.15789	Rarely mutated in samples (<7%)
PRR12	45	38	842	0.045	No	1.18421	Rarely mutated in samples (<7%)
CHD8	39	38	842	0.045	No	1.02632	Rarely mutated in samples (<7%)
PDZD4	33	28	619	0.045	No	1.17857	Rarely mutated in samples (<7%)
SPECC1	41	38	842	0.045	No	1.07895	Rarely mutated in samples (<7%)
SETDB1	39	38	842	0.045	Yes	1.02632	Rarely mutated in samples (<7%)
HEATR5B	46	38	842	0.045	No	1.21053	Rarely mutated in samples (<7%)
OGDHL	42	38	842	0.045	No	1.10526	Rarely mutated in samples (<7%)
MYH13	47	38	842	0.045	No	1.23684	Rarely mutated in samples (<7%)
PLEKHA7	40	38	842	0.045	No	1.05263	Rarely mutated in samples (<7%)
PCDH7	40	38	842	0.045	No	1.05263	Rarely mutated in samples (<7%)
PHKA2	39	38	842	0.045	No	1.02632	Rarely mutated in samples (<7%)
PIK3C2B	44	38	842	0.045	Yes	1.15789	Rarely mutated in samples (<7%)
PLXNB3	39	38	842	0.045	No	1.02632	Rarely mutated in samples (<7%)
PCDH11X	52	38	842	0.045	No	1.36842	Rarely mutated in samples (<7%)
TANC2	43	38	842	0.045	No	1.13158	Rarely mutated in samples (<7%)
PPP1R10	39	38	842	0.045	No	1.02632	Rarely mutated in samples (<7%)
PCDH12	39	38	842	0.045	No	1.02632	Rarely mutated in samples (<7%)
MUSK	40	38	842	0.045	No	1.05263	Rarely mutated in samples (<7%)
TONSL	29	28	619	0.045	No	1.03571	Rarely mutated in samples (<7%)
A2ML1	42	38	842	0.045	No	1.10526	Rarely mutated in samples (<7%)
RTEL1	32	28	619	0.045	Yes	1.14286	Rarely mutated in samples (<7%)
ITGA5	40	37	842	0.044	No	1.08108	Rarely mutated in samples (<7%)
KDM4B	27	27	619	0.044	No	1	Rarely mutated in samples (<7%)
ABCC11	41	37	842	0.044	No	1.10811	Rarely mutated in samples (<7%)
TNN	42	37	842	0.044	No	1.13514	Rarely mutated in samples (<7%)
ADAM29	40	37	842	0.044	No	1.08108	Rarely mutated in samples (<7%)
KCND2	41	37	842	0.044	No	1.10811	Rarely mutated in samples (<7%)
ATP11B	47	37	842	0.044	No	1.27027	Rarely mutated in samples (<7%)
CHEK2	38	37	842	0.044	Yes	1.02703	Rarely mutated in samples (<7%)
MAPK8IP3	39	37	842	0.044	No	1.05405	Rarely mutated in samples (<7%)
WDR17	48	37	842	0.044	No	1.2973	Rarely mutated in samples (<7%)
SIN3A	46	37	842	0.044	No	1.24324	Rarely mutated in samples (<7%)
ATXN2L	41	37	842	0.044	No	1.10811	Rarely mutated in samples (<7%)
LAMB1	42	37	842	0.044	No	1.13514	Rarely mutated in samples (<7%)
ABCC5	40	37	842	0.044	No	1.08108	Rarely mutated in samples (<7%)
CRTC1	39	37	842	0.044	Yes	1.05405	Rarely mutated in samples (<7%)
CABIN1	44	37	842	0.044	No	1.18919	Rarely mutated in samples (<7%)
RBM6	45	37	842	0.044	No	1.21622	Rarely mutated in samples (<7%)
PLXNC1	45	37	842	0.044	No	1.21622	Rarely mutated in samples (<7%)
GRIA3	40	37	842	0.044	No	1.08108	Rarely mutated in samples (<7%)
GRIA4	46	37	842	0.044	No	1.24324	Rarely mutated in samples (<7%)
GRM8	45	37	842	0.044	No	1.21622	Rarely mutated in samples (<7%)
MYPN	39	37	842	0.044	No	1.05405	Rarely mutated in samples (<7%)
CNTNAP5	42	37	842	0.044	No	1.13514	Rarely mutated in samples (<7%)
FCRL5	41	37	842	0.044	No	1.10811	Rarely mutated in samples (<7%)
ZMIZ1	41	37	842	0.044	No	1.10811	Rarely mutated in samples (<7%)
NLGN4X	38	37	842	0.044	No	1.02703	Rarely mutated in samples (<7%)
GPR158	42	37	842	0.044	No	1.13514	Rarely mutated in samples (<7%)
NLRP1	39	37	842	0.044	No	1.05405	Rarely mutated in samples (<7%)
DOCK6	42	37	842	0.044	No	1.13514	Rarely mutated in samples (<7%)
PCDHB6	39	37	842	0.044	No	1.05405	Rarely mutated in samples (<7%)
CCDC40	38	37	842	0.044	No	1.02703	Rarely mutated in samples (<7%)
KCNT1	40	37	842	0.044	No	1.08108	Rarely mutated in samples (<7%)
ZNF687	39	37	842	0.044	No	1.05405	Rarely mutated in samples (<7%)
SBNO1	44	37	842	0.044	No	1.18919	Rarely mutated in samples (<7%)
NALF1	40	37	842	0.044	No	1.08108	Rarely mutated in samples (<7%)
SHPRH	45	37	842	0.044	No	1.21622	Rarely mutated in samples (<7%)
PKD1L2	44	37	842	0.044	No	1.18919	Rarely mutated in samples (<7%)
MICAL2	43	37	842	0.044	No	1.16216	Rarely mutated in samples (<7%)
TTC37	39	37	842	0.044	No	1.05405	Rarely mutated in samples (<7%)
WSCD2	37	37	842	0.044	No	1	Rarely mutated in samples (<7%)
THBS3	37	37	842	0.044	No	1	Rarely mutated in samples (<7%)
DHX34	28	27	619	0.044	No	1.03704	Rarely mutated in samples (<7%)
ZNF646	41	37	842	0.044	No	1.10811	Rarely mutated in samples (<7%)
ZEB2	45	37	842	0.044	No	1.21622	Rarely mutated in samples (<7%)
CBX4	27	27	619	0.044	No	1	Rarely mutated in samples (<7%)
MAGI2	45	43	980	0.044	No	1.04651	Rarely mutated in samples (<7%)
PPP1R26	40	37	842	0.044	No	1.08108	Rarely mutated in samples (<7%)
TELO2	27	27	619	0.044	No	1	Rarely mutated in samples (<7%)
ZNF407	47	37	842	0.044	No	1.27027	Rarely mutated in samples (<7%)
DLEC1	42	37	842	0.044	No	1.13514	Rarely mutated in samples (<7%)
ARHGAP5	41	37	842	0.044	No	1.10811	Rarely mutated in samples (<7%)
SSH1	40	37	842	0.044	No	1.08108	Rarely mutated in samples (<7%)
PCDH18	42	37	842	0.044	No	1.13514	Rarely mutated in samples (<7%)
ADGRB2	39	37	842	0.044	No	1.05405	Rarely mutated in samples (<7%)
MAST4	43	37	842	0.044	No	1.16216	Rarely mutated in samples (<7%)
FOXK1	40	37	842	0.044	No	1.08108	Rarely mutated in samples (<7%)
ATXN1	43	37	842	0.044	No	1.16216	Rarely mutated in samples (<7%)
ADAMTSL1	40	37	842	0.044	No	1.08108	Rarely mutated in samples (<7%)
PCDHGC3	40	37	842	0.044	No	1.08108	Rarely mutated in samples (<7%)
SULF2	41	37	842	0.044	No	1.10811	Rarely mutated in samples (<7%)
ZNF142	42	37	842	0.044	No	1.13514	Rarely mutated in samples (<7%)
CACNA1S	41	37	842	0.044	No	1.10811	Rarely mutated in samples (<7%)
ZNF217	41	37	842	0.044	Yes	1.10811	Rarely mutated in samples (<7%)
CNGB3	42	37	842	0.044	No	1.13514	Rarely mutated in samples (<7%)
ANKHD1	41	37	842	0.044	No	1.10811	Rarely mutated in samples (<7%)
USP7	39	37	842	0.044	No	1.05405	Rarely mutated in samples (<7%)
CPSF1	39	37	842	0.044	No	1.05405	Rarely mutated in samples (<7%)
ZNF106	42	37	842	0.044	No	1.13514	Rarely mutated in samples (<7%)
RBM12B	41	37	842	0.044	No	1.10811	Rarely mutated in samples (<7%)
ERC2	40	37	842	0.044	No	1.08108	Rarely mutated in samples (<7%)
SIGLEC1	41	37	842	0.044	No	1.10811	Rarely mutated in samples (<7%)
ZNF721	45	37	842	0.044	No	1.21622	Rarely mutated in samples (<7%)
MAP2K7	32	27	619	0.044	No	1.18519	Rarely mutated in samples (<7%)
CAPRIN2	44	37	842	0.044	No	1.18919	Rarely mutated in samples (<7%)
PTCH1	46	43	980	0.044	Yes	1.06977	Rarely mutated in samples (<7%)
SMARCAL1	37	37	842	0.044	No	1	Rarely mutated in samples (<7%)
FGA	40	37	842	0.044	No	1.08108	Rarely mutated in samples (<7%)
TUBGCP6	41	36	842	0.043	No	1.13889	Rarely mutated in samples (<7%)
ANKRD27	37	36	842	0.043	No	1.02778	Rarely mutated in samples (<7%)
CNTRL	43	36	842	0.043	Yes	1.19444	Rarely mutated in samples (<7%)
NCOA6	45	36	842	0.043	No	1.25	Rarely mutated in samples (<7%)
UNC13A	42	36	842	0.043	No	1.16667	Rarely mutated in samples (<7%)
DOP1A	40	36	842	0.043	No	1.11111	Rarely mutated in samples (<7%)
PRDM16	39	36	842	0.043	Yes	1.08333	Rarely mutated in samples (<7%)
CLCN4	40	36	842	0.043	No	1.11111	Rarely mutated in samples (<7%)
TBC1D1	36	36	842	0.043	No	1	Rarely mutated in samples (<7%)
GPATCH8	37	36	842	0.043	No	1.02778	Rarely mutated in samples (<7%)
PHLDB1	36	36	842	0.043	No	1	Rarely mutated in samples (<7%)
GABBR1	38	36	842	0.043	No	1.05556	Rarely mutated in samples (<7%)
CUX2	40	36	842	0.043	No	1.11111	Rarely mutated in samples (<7%)
MTUS2	43	36	842	0.043	No	1.19444	Rarely mutated in samples (<7%)
CR2	40	36	842	0.043	No	1.11111	Rarely mutated in samples (<7%)
NLRP5	39	36	842	0.043	No	1.08333	Rarely mutated in samples (<7%)
GRIP1	39	36	842	0.043	No	1.08333	Rarely mutated in samples (<7%)
ENAM	38	36	842	0.043	No	1.05556	Rarely mutated in samples (<7%)
PPP1R13B	38	36	842	0.043	No	1.05556	Rarely mutated in samples (<7%)
STAG1	38	36	842	0.043	Yes	1.05556	Rarely mutated in samples (<7%)
UBE4B	38	36	842	0.043	No	1.05556	Rarely mutated in samples (<7%)
SPATA31E1	38	36	842	0.043	No	1.05556	Rarely mutated in samples (<7%)
DCAF12L1	38	36	842	0.043	No	1.05556	Rarely mutated in samples (<7%)
TTBK1	40	36	842	0.043	No	1.11111	Rarely mutated in samples (<7%)
MYBBP1A	41	36	842	0.043	No	1.13889	Rarely mutated in samples (<7%)
HFM1	46	36	842	0.043	No	1.27778	Rarely mutated in samples (<7%)
MAP3K6	38	36	842	0.043	Yes	1.05556	Rarely mutated in samples (<7%)
KDM5B	36	36	842	0.043	No	1	Rarely mutated in samples (<7%)
CCDC80	41	36	842	0.043	No	1.13889	Rarely mutated in samples (<7%)
NID2	40	36	842	0.043	No	1.11111	Rarely mutated in samples (<7%)
ALPK3	38	36	842	0.043	No	1.05556	Rarely mutated in samples (<7%)
DLGAP2	39	36	842	0.043	No	1.08333	Rarely mutated in samples (<7%)
PCDHAC1	41	36	842	0.043	No	1.13889	Rarely mutated in samples (<7%)
GPR50	38	36	842	0.043	No	1.05556	Rarely mutated in samples (<7%)
CACHD1	41	36	842	0.043	No	1.13889	Rarely mutated in samples (<7%)
EML5	43	36	842	0.043	No	1.19444	Rarely mutated in samples (<7%)
DIP2B	37	36	842	0.043	No	1.02778	Rarely mutated in samples (<7%)
SHROOM3	38	36	842	0.043	No	1.05556	Rarely mutated in samples (<7%)
ARHGAP21	42	36	842	0.043	No	1.16667	Rarely mutated in samples (<7%)
ADAM12	36	36	842	0.043	No	1	Rarely mutated in samples (<7%)
FIGN	39	36	842	0.043	No	1.08333	Rarely mutated in samples (<7%)
ARHGAP33	39	36	842	0.043	No	1.08333	Rarely mutated in samples (<7%)
CFAP43	42	36	842	0.043	No	1.16667	Rarely mutated in samples (<7%)
GDF5	37	36	842	0.043	No	1.02778	Rarely mutated in samples (<7%)
MAP3K19	47	36	842	0.043	No	1.30556	Rarely mutated in samples (<7%)
TMEM132B	37	36	842	0.043	No	1.02778	Rarely mutated in samples (<7%)
ADAR	39	36	842	0.043	No	1.08333	Rarely mutated in samples (<7%)
JAG1	39	36	842	0.043	No	1.08333	Rarely mutated in samples (<7%)
PPFIA1	40	36	842	0.043	No	1.11111	Rarely mutated in samples (<7%)
RUSC2	36	36	842	0.043	No	1	Rarely mutated in samples (<7%)
TRANK1	50	36	842	0.043	No	1.38889	Rarely mutated in samples (<7%)
PTCHD3	39	36	842	0.043	No	1.08333	Rarely mutated in samples (<7%)
NRP2	42	36	842	0.043	No	1.16667	Rarely mutated in samples (<7%)
ADCY10	43	36	842	0.043	No	1.19444	Rarely mutated in samples (<7%)
ZNF616	40	36	842	0.043	No	1.11111	Rarely mutated in samples (<7%)
TRPM4	38	36	842	0.043	No	1.05556	Rarely mutated in samples (<7%)
ZNF804A	49	36	842	0.043	No	1.36111	Rarely mutated in samples (<7%)
ABCB4	39	36	842	0.043	No	1.08333	Rarely mutated in samples (<7%)
SLIT1	40	36	842	0.043	No	1.11111	Rarely mutated in samples (<7%)
SMARCA2	41	36	842	0.043	Yes	1.13889	Rarely mutated in samples (<7%)
PIK3R1	50	42	980	0.043	Yes	1.19048	Rarely mutated in samples (<7%)
TASOR2	46	36	842	0.043	No	1.27778	Rarely mutated in samples (<7%)
MAP1A	52	36	842	0.043	No	1.44444	Rarely mutated in samples (<7%)
ARAP3	39	36	842	0.043	No	1.08333	Rarely mutated in samples (<7%)
ABCC10	41	36	842	0.043	No	1.13889	Rarely mutated in samples (<7%)
AFF1	37	36	842	0.043	Yes	1.02778	Rarely mutated in samples (<7%)
MMS22L	40	36	842	0.043	No	1.11111	Rarely mutated in samples (<7%)
PSD	37	36	842	0.043	No	1.02778	Rarely mutated in samples (<7%)
NCKAP1L	42	36	842	0.043	No	1.16667	Rarely mutated in samples (<7%)
SPTBN5	45	36	842	0.043	No	1.25	Rarely mutated in samples (<7%)
PTPRF	38	36	842	0.043	No	1.05556	Rarely mutated in samples (<7%)
PTPRG	42	36	842	0.043	No	1.16667	Rarely mutated in samples (<7%)
PYGB	36	36	842	0.043	No	1	Rarely mutated in samples (<7%)
YTHDC2	38	36	842	0.043	No	1.05556	Rarely mutated in samples (<7%)
FANCD2	39	36	842	0.043	Yes	1.08333	Rarely mutated in samples (<7%)
BOD1L1	43	35	842	0.042	No	1.22857	Rarely mutated in samples (<7%)
ZNF292	45	35	842	0.042	No	1.28571	Rarely mutated in samples (<7%)
MAPKBP1	38	35	842	0.042	No	1.08571	Rarely mutated in samples (<7%)
DCAF4L2	39	35	842	0.042	No	1.11429	Rarely mutated in samples (<7%)
EXPH5	44	35	842	0.042	No	1.25714	Rarely mutated in samples (<7%)
JUP	36	35	842	0.042	No	1.02857	Rarely mutated in samples (<7%)
UBR2	44	35	842	0.042	No	1.25714	Rarely mutated in samples (<7%)
NCAPD3	39	35	842	0.042	No	1.11429	Rarely mutated in samples (<7%)
ARAP2	43	35	842	0.042	No	1.22857	Rarely mutated in samples (<7%)
ADGRL2	43	35	842	0.042	No	1.22857	Rarely mutated in samples (<7%)
RRP12	28	26	619	0.042	No	1.07692	Rarely mutated in samples (<7%)
CRB1	37	35	842	0.042	No	1.05714	Rarely mutated in samples (<7%)
ADNP	37	35	842	0.042	No	1.05714	Rarely mutated in samples (<7%)
DOCK9	36	35	842	0.042	No	1.02857	Rarely mutated in samples (<7%)
KAT6B	39	35	842	0.042	Yes	1.11429	Rarely mutated in samples (<7%)
ABCA6	46	35	842	0.042	No	1.31429	Rarely mutated in samples (<7%)
CTNND1	38	35	842	0.042	No	1.08571	Rarely mutated in samples (<7%)
GRIK1	42	35	842	0.042	No	1.2	Rarely mutated in samples (<7%)
ABCA9	47	35	842	0.042	No	1.34286	Rarely mutated in samples (<7%)
GUCY1A2	39	35	842	0.042	No	1.11429	Rarely mutated in samples (<7%)
LRRTM1	36	35	842	0.042	No	1.02857	Rarely mutated in samples (<7%)
EDNRB	38	35	842	0.042	No	1.08571	Rarely mutated in samples (<7%)
EIF4G1	42	35	842	0.042	No	1.2	Rarely mutated in samples (<7%)
ZSCAN10	26	26	619	0.042	No	1	Rarely mutated in samples (<7%)
PCDHB15	36	35	842	0.042	No	1.02857	Rarely mutated in samples (<7%)
LAMB4	43	35	842	0.042	No	1.22857	Rarely mutated in samples (<7%)
KLHL4	36	35	842	0.042	No	1.02857	Rarely mutated in samples (<7%)
RASA3	37	35	842	0.042	No	1.05714	Rarely mutated in samples (<7%)
CEP131	27	26	619	0.042	No	1.03846	Rarely mutated in samples (<7%)
CD163	39	35	842	0.042	No	1.11429	Rarely mutated in samples (<7%)
PNPLA6	40	35	842	0.042	No	1.14286	Rarely mutated in samples (<7%)
ODAD2	38	35	842	0.042	No	1.08571	Rarely mutated in samples (<7%)
RIPOR3	35	35	842	0.042	No	1	Rarely mutated in samples (<7%)
JAKMIP1	36	35	842	0.042	No	1.02857	Rarely mutated in samples (<7%)
DOCK5	39	35	842	0.042	No	1.11429	Rarely mutated in samples (<7%)
ALPK2	44	35	842	0.042	No	1.25714	Rarely mutated in samples (<7%)
PREPL	37	35	842	0.042	No	1.05714	Rarely mutated in samples (<7%)
TPTE2	40	35	842	0.042	No	1.14286	Rarely mutated in samples (<7%)
TET1	49	41	980	0.042	Yes	1.19512	Rarely mutated in samples (<7%)
SETD2	49	41	980	0.042	Yes	1.19512	Rarely mutated in samples (<7%)
FYCO1	38	35	842	0.042	No	1.08571	Rarely mutated in samples (<7%)
ADD2	37	35	842	0.042	No	1.05714	Rarely mutated in samples (<7%)
CDC42BPG	35	35	842	0.042	No	1	Rarely mutated in samples (<7%)
TSC2	36	35	842	0.042	Yes	1.02857	Rarely mutated in samples (<7%)
IQSEC1	39	35	842	0.042	No	1.11429	Rarely mutated in samples (<7%)
CCDC158	41	35	842	0.042	No	1.17143	Rarely mutated in samples (<7%)
MED12	38	35	842	0.042	Yes	1.08571	Rarely mutated in samples (<7%)
TNKS	36	35	842	0.042	No	1.02857	Rarely mutated in samples (<7%)
RLF	44	35	842	0.042	No	1.25714	Rarely mutated in samples (<7%)
KCNH7	41	35	842	0.042	No	1.17143	Rarely mutated in samples (<7%)
ZSWIM4	37	35	842	0.042	No	1.05714	Rarely mutated in samples (<7%)
CENPJ	42	35	842	0.042	No	1.2	Rarely mutated in samples (<7%)
PDE1C	35	35	842	0.042	No	1	Rarely mutated in samples (<7%)
SIM1	36	35	842	0.042	No	1.02857	Rarely mutated in samples (<7%)
ATP8B1	38	35	842	0.042	No	1.08571	Rarely mutated in samples (<7%)
SLC8A1	35	35	842	0.042	No	1	Rarely mutated in samples (<7%)
NPC1L1	35	35	842	0.042	No	1	Rarely mutated in samples (<7%)
LRBA	46	35	842	0.042	No	1.31429	Rarely mutated in samples (<7%)
LRP6	40	35	842	0.042	Yes	1.14286	Rarely mutated in samples (<7%)
LRIG1	37	35	842	0.042	No	1.05714	Rarely mutated in samples (<7%)
TMEM132E	37	35	842	0.042	No	1.05714	Rarely mutated in samples (<7%)
INTS1	41	35	842	0.042	No	1.17143	Rarely mutated in samples (<7%)
MAN2B1	37	35	842	0.042	No	1.05714	Rarely mutated in samples (<7%)
NAV1	40	35	842	0.042	No	1.14286	Rarely mutated in samples (<7%)
PKN1	36	35	842	0.042	No	1.02857	Rarely mutated in samples (<7%)
PRKCQ	38	35	842	0.042	No	1.08571	Rarely mutated in samples (<7%)
EBF3	37	35	842	0.042	No	1.05714	Rarely mutated in samples (<7%)
TNS3	41	35	842	0.042	No	1.17143	Rarely mutated in samples (<7%)
ENGASE	27	26	619	0.042	No	1.03846	Rarely mutated in samples (<7%)
PCDH20	39	35	842	0.042	No	1.11429	Rarely mutated in samples (<7%)
TRIM33	37	35	842	0.042	Yes	1.05714	Rarely mutated in samples (<7%)
EFCAB6	46	35	842	0.042	No	1.31429	Rarely mutated in samples (<7%)
RET	41	35	842	0.042	Yes	1.17143	Rarely mutated in samples (<7%)
EPHA3	43	41	980	0.042	Yes	1.04878	Rarely mutated in samples (<7%)
EPB41L1	36	35	842	0.042	No	1.02857	Rarely mutated in samples (<7%)
IGF1R	38	35	842	0.042	Yes	1.08571	Rarely mutated in samples (<7%)
PAN3	37	35	842	0.042	No	1.05714	Rarely mutated in samples (<7%)
NOTCH2	43	41	980	0.042	Yes	1.04878	Rarely mutated in samples (<7%)
NPHS1	40	35	842	0.042	No	1.14286	Rarely mutated in samples (<7%)
NRAP	46	35	842	0.042	No	1.31429	Rarely mutated in samples (<7%)
NR4A2	36	35	842	0.042	No	1.02857	Rarely mutated in samples (<7%)
PBRM1	42	40	980	0.041	Yes	1.05	Rarely mutated in samples (<7%)
INSR	36	34	842	0.04	Yes	1.05882	Rarely mutated in samples (<7%)
PLCH1	40	34	842	0.04	No	1.17647	Rarely mutated in samples (<7%)
ITSN2	38	34	842	0.04	No	1.11765	Rarely mutated in samples (<7%)
JAG2	27	25	619	0.04	No	1.08	Rarely mutated in samples (<7%)
KDR	45	39	980	0.04	Yes	1.15385	Rarely mutated in samples (<7%)
TTLL12	25	25	619	0.04	No	1	Rarely mutated in samples (<7%)
IRX2	37	34	842	0.04	No	1.08824	Rarely mutated in samples (<7%)
ACLY	38	34	842	0.04	No	1.11765	Rarely mutated in samples (<7%)
POLR3A	38	34	842	0.04	No	1.11765	Rarely mutated in samples (<7%)
DIP2A	35	34	842	0.04	No	1.02941	Rarely mutated in samples (<7%)
ARAP1	38	34	842	0.04	No	1.11765	Rarely mutated in samples (<7%)
BICD2	36	34	842	0.04	No	1.05882	Rarely mutated in samples (<7%)
SMG6	34	34	842	0.04	No	1	Rarely mutated in samples (<7%)
SMC4	37	34	842	0.04	No	1.08824	Rarely mutated in samples (<7%)
ICE1	38	34	842	0.04	No	1.11765	Rarely mutated in samples (<7%)
BRSK1	36	34	842	0.04	Yes	1.05882	Rarely mutated in samples (<7%)
GRIN2D	35	34	842	0.04	No	1.02941	Rarely mutated in samples (<7%)
GRM7	36	34	842	0.04	No	1.05882	Rarely mutated in samples (<7%)
MSH6	46	39	980	0.04	Yes	1.17949	Rarely mutated in samples (<7%)
PLEKHG4B	40	34	842	0.04	No	1.17647	Rarely mutated in samples (<7%)
MAGEC3	36	34	842	0.04	No	1.05882	Rarely mutated in samples (<7%)
EGFR	42	39	980	0.04	Yes	1.07692	Rarely mutated in samples (<7%)
TAF1C	40	34	842	0.04	No	1.17647	Rarely mutated in samples (<7%)
PCDHGA11	35	34	842	0.04	No	1.02941	Rarely mutated in samples (<7%)
PCDHGA6	37	34	842	0.04	No	1.08824	Rarely mutated in samples (<7%)
KCNQ4	34	34	842	0.04	No	1	Rarely mutated in samples (<7%)
TRAPPC9	37	34	842	0.04	No	1.08824	Rarely mutated in samples (<7%)
ZNF608	38	34	842	0.04	No	1.11765	Rarely mutated in samples (<7%)
IGSF9B	39	34	842	0.04	No	1.14706	Rarely mutated in samples (<7%)
DPP10	41	34	842	0.04	No	1.20588	Rarely mutated in samples (<7%)
ACIN1	36	34	842	0.04	No	1.05882	Rarely mutated in samples (<7%)
SORCS3	37	34	842	0.04	No	1.08824	Rarely mutated in samples (<7%)
SHANK2	37	34	842	0.04	No	1.08824	Rarely mutated in samples (<7%)
WDR90	37	34	842	0.04	Yes	1.08824	Rarely mutated in samples (<7%)
PARD3	39	34	842	0.04	No	1.14706	Rarely mutated in samples (<7%)
SFMBT2	38	34	842	0.04	No	1.11765	Rarely mutated in samples (<7%)
QKI	38	34	842	0.04	Yes	1.11765	Rarely mutated in samples (<7%)
DDI1	36	34	842	0.04	No	1.05882	Rarely mutated in samples (<7%)
TRPM8	42	34	842	0.04	No	1.23529	Rarely mutated in samples (<7%)
MYOCD	37	34	842	0.04	No	1.08824	Rarely mutated in samples (<7%)
NLRP7	40	34	842	0.04	No	1.17647	Rarely mutated in samples (<7%)
ZNF592	36	34	842	0.04	No	1.05882	Rarely mutated in samples (<7%)
CROCC	27	25	619	0.04	No	1.08	Rarely mutated in samples (<7%)
TGFBR2	40	39	980	0.04	Yes	1.02564	Rarely mutated in samples (<7%)
LTBP4	39	34	842	0.04	No	1.14706	Rarely mutated in samples (<7%)
KCNT2	42	34	842	0.04	No	1.23529	Rarely mutated in samples (<7%)
DGKH	38	34	842	0.04	No	1.11765	Rarely mutated in samples (<7%)
TRPV6	37	34	842	0.04	No	1.08824	Rarely mutated in samples (<7%)
SAGE1	36	34	842	0.04	No	1.05882	Rarely mutated in samples (<7%)
JAKMIP2	41	34	842	0.04	No	1.20588	Rarely mutated in samples (<7%)
UGGT1	41	34	842	0.04	No	1.20588	Rarely mutated in samples (<7%)
ITGA10	36	34	842	0.04	No	1.05882	Rarely mutated in samples (<7%)
TRPC5	37	34	842	0.04	No	1.08824	Rarely mutated in samples (<7%)
ANPEP	36	34	842	0.04	No	1.05882	Rarely mutated in samples (<7%)
TUBA3C	37	34	842	0.04	No	1.08824	Rarely mutated in samples (<7%)
NLRX1	28	25	619	0.04	No	1.12	Rarely mutated in samples (<7%)
DENND4B	37	34	842	0.04	No	1.08824	Rarely mutated in samples (<7%)
AR	42	39	980	0.04	Yes	1.07692	Rarely mutated in samples (<7%)
WNK1	36	34	842	0.04	No	1.05882	Rarely mutated in samples (<7%)
SH3TC1	36	34	842	0.04	No	1.05882	Rarely mutated in samples (<7%)
ADAM15	35	34	842	0.04	No	1.02941	Rarely mutated in samples (<7%)
XRN1	38	34	842	0.04	No	1.11765	Rarely mutated in samples (<7%)
RERE	36	34	842	0.04	No	1.05882	Rarely mutated in samples (<7%)
ATP12A	40	34	842	0.04	No	1.17647	Rarely mutated in samples (<7%)
ATP2A3	36	34	842	0.04	No	1.05882	Rarely mutated in samples (<7%)
ATP8B4	36	34	842	0.04	No	1.05882	Rarely mutated in samples (<7%)
PUS7	36	34	842	0.04	No	1.05882	Rarely mutated in samples (<7%)
CSPP1	42	34	842	0.04	No	1.23529	Rarely mutated in samples (<7%)
ZIC1	37	34	842	0.04	No	1.08824	Rarely mutated in samples (<7%)
UNC5B	36	34	842	0.04	No	1.05882	Rarely mutated in samples (<7%)
CDH20	39	34	842	0.04	No	1.14706	Rarely mutated in samples (<7%)
ZNF777	36	34	842	0.04	No	1.05882	Rarely mutated in samples (<7%)
PDGFRA	50	39	980	0.04	Yes	1.28205	Rarely mutated in samples (<7%)
CSDE1	38	34	842	0.04	Yes	1.11765	Rarely mutated in samples (<7%)
SAMD9	47	34	842	0.04	No	1.38235	Rarely mutated in samples (<7%)
CC2D1A	37	34	842	0.04	No	1.08824	Rarely mutated in samples (<7%)
AUTS2	37	34	842	0.04	No	1.08824	Rarely mutated in samples (<7%)
SEMA4C	26	25	619	0.04	No	1.04	Rarely mutated in samples (<7%)
MCM2	25	25	619	0.04	No	1	Rarely mutated in samples (<7%)
PPP1R3A	39	34	842	0.04	No	1.14706	Rarely mutated in samples (<7%)
ZNF479	42	34	842	0.04	No	1.23529	Rarely mutated in samples (<7%)
NLRP11	37	34	842	0.04	No	1.08824	Rarely mutated in samples (<7%)
PTPN14	36	34	842	0.04	No	1.05882	Rarely mutated in samples (<7%)
ZNF800	37	34	842	0.04	No	1.08824	Rarely mutated in samples (<7%)
PZP	43	34	842	0.04	No	1.26471	Rarely mutated in samples (<7%)
RGL2	25	25	619	0.04	No	1	Rarely mutated in samples (<7%)
EPHB6	44	39	980	0.04	No	1.12821	Rarely mutated in samples (<7%)
EVC	39	34	842	0.04	No	1.14706	Rarely mutated in samples (<7%)
NFATC4	35	34	842	0.04	No	1.02941	Rarely mutated in samples (<7%)
NPR2	37	34	842	0.04	No	1.08824	Rarely mutated in samples (<7%)
OPLAH	26	25	619	0.04	No	1.04	Rarely mutated in samples (<7%)
DUOX2	37	34	842	0.04	No	1.08824	Rarely mutated in samples (<7%)
IL16	39	34	842	0.04	No	1.14706	Rarely mutated in samples (<7%)
ITIH1	35	33	842	0.039	No	1.06061	Rarely mutated in samples (<7%)
PDS5B	37	33	842	0.039	Yes	1.12121	Rarely mutated in samples (<7%)
ZHX3	35	33	842	0.039	No	1.06061	Rarely mutated in samples (<7%)
ADAMTS13	33	33	842	0.039	No	1	Rarely mutated in samples (<7%)
CHD2	38	33	842	0.039	Yes	1.15152	Rarely mutated in samples (<7%)
WHRN	35	33	842	0.039	No	1.06061	Rarely mutated in samples (<7%)
ZC3H3	27	24	619	0.039	No	1.125	Rarely mutated in samples (<7%)
BAZ2A	39	33	842	0.039	No	1.18182	Rarely mutated in samples (<7%)
POGZ	36	33	842	0.039	No	1.09091	Rarely mutated in samples (<7%)
ACTN2	34	33	842	0.039	No	1.0303	Rarely mutated in samples (<7%)
KIFC3	36	33	842	0.039	No	1.09091	Rarely mutated in samples (<7%)
HCN4	35	33	842	0.039	No	1.06061	Rarely mutated in samples (<7%)
NUP210	33	33	842	0.039	No	1	Rarely mutated in samples (<7%)
GPR45	34	33	842	0.039	No	1.0303	Rarely mutated in samples (<7%)
LDLR	33	33	842	0.039	No	1	Rarely mutated in samples (<7%)
COL11A2	36	33	842	0.039	No	1.09091	Rarely mutated in samples (<7%)
COL15A1	44	33	842	0.039	No	1.33333	Rarely mutated in samples (<7%)
KCNH3	34	33	842	0.039	No	1.0303	Rarely mutated in samples (<7%)
MED13L	34	33	842	0.039	No	1.0303	Rarely mutated in samples (<7%)
GOLGA4	51	33	842	0.039	No	1.54545	Rarely mutated in samples (<7%)
RABGAP1	37	33	842	0.039	No	1.12121	Rarely mutated in samples (<7%)
DHX8	34	33	842	0.039	No	1.0303	Rarely mutated in samples (<7%)
TNRC18	35	33	842	0.039	No	1.06061	Rarely mutated in samples (<7%)
SLITRK4	38	33	842	0.039	No	1.15152	Rarely mutated in samples (<7%)
MEGF6	33	33	842	0.039	No	1	Rarely mutated in samples (<7%)
SEMA5A	36	33	842	0.039	No	1.09091	Rarely mutated in samples (<7%)
NES	38	33	842	0.039	No	1.15152	Rarely mutated in samples (<7%)
STAG2	34	33	842	0.039	Yes	1.0303	Rarely mutated in samples (<7%)
PCDHGA1	38	33	842	0.039	No	1.15152	Rarely mutated in samples (<7%)
PCDHB11	35	33	842	0.039	No	1.06061	Rarely mutated in samples (<7%)
ADGRL1	37	33	842	0.039	No	1.12121	Rarely mutated in samples (<7%)
LILRB1	36	33	842	0.039	No	1.09091	Rarely mutated in samples (<7%)
USP26	39	33	842	0.039	No	1.18182	Rarely mutated in samples (<7%)
KIF17	36	33	842	0.039	No	1.09091	Rarely mutated in samples (<7%)
ZMYM4	41	33	842	0.039	No	1.24242	Rarely mutated in samples (<7%)
PCNX1	41	33	842	0.039	No	1.24242	Rarely mutated in samples (<7%)
CEP152	46	33	842	0.039	No	1.39394	Rarely mutated in samples (<7%)
LRFN1	25	24	619	0.039	No	1.04167	Rarely mutated in samples (<7%)
DHX37	34	33	842	0.039	No	1.0303	Rarely mutated in samples (<7%)
MYH15	44	33	842	0.039	No	1.33333	Rarely mutated in samples (<7%)
BRINP2	37	33	842	0.039	No	1.12121	Rarely mutated in samples (<7%)
RECQL4	25	24	619	0.039	Yes	1.04167	Rarely mutated in samples (<7%)
ZNF429	38	33	842	0.039	No	1.15152	Rarely mutated in samples (<7%)
EPX	34	33	842	0.039	No	1.0303	Rarely mutated in samples (<7%)
NCOR1	38	33	842	0.039	Yes	1.15152	Rarely mutated in samples (<7%)
CTR9	35	33	842	0.039	Yes	1.06061	Rarely mutated in samples (<7%)
ARHGEF10	37	33	842	0.039	No	1.12121	Rarely mutated in samples (<7%)
DROSHA	42	33	842	0.039	Yes	1.27273	Rarely mutated in samples (<7%)
DHX16	34	33	842	0.039	No	1.0303	Rarely mutated in samples (<7%)
ANKRD30A	35	33	842	0.039	No	1.06061	Rarely mutated in samples (<7%)
FSTL5	38	33	842	0.039	No	1.15152	Rarely mutated in samples (<7%)
TTC3	47	33	842	0.039	No	1.42424	Rarely mutated in samples (<7%)
TTK	38	33	842	0.039	No	1.15152	Rarely mutated in samples (<7%)
YEATS2	34	33	842	0.039	No	1.0303	Rarely mutated in samples (<7%)
MAP7D3	35	33	842	0.039	No	1.06061	Rarely mutated in samples (<7%)
NAA16	37	33	842	0.039	No	1.12121	Rarely mutated in samples (<7%)
PCDHGB4	35	33	842	0.039	No	1.06061	Rarely mutated in samples (<7%)
SHROOM2	36	33	842	0.039	No	1.09091	Rarely mutated in samples (<7%)
KLHL36	25	24	619	0.039	No	1.04167	Rarely mutated in samples (<7%)
SLCO6A1	37	33	842	0.039	No	1.12121	Rarely mutated in samples (<7%)
IQCN	36	33	842	0.039	No	1.09091	Rarely mutated in samples (<7%)
ATP2B3	35	33	842	0.039	Yes	1.06061	Rarely mutated in samples (<7%)
RPL22	33	33	842	0.039	Yes	1	Rarely mutated in samples (<7%)
RPS6KA2	36	33	842	0.039	No	1.09091	Rarely mutated in samples (<7%)
SLTM	37	33	842	0.039	No	1.12121	Rarely mutated in samples (<7%)
MXRA8	25	24	619	0.039	No	1.04167	Rarely mutated in samples (<7%)
CLIP1	37	33	842	0.039	Yes	1.12121	Rarely mutated in samples (<7%)
NLRP12	39	33	842	0.039	No	1.18182	Rarely mutated in samples (<7%)
TICRR	36	33	842	0.039	No	1.09091	Rarely mutated in samples (<7%)
XYLT1	36	33	842	0.039	No	1.09091	Rarely mutated in samples (<7%)
WDR72	42	33	842	0.039	No	1.27273	Rarely mutated in samples (<7%)
CALD1	34	33	842	0.039	No	1.0303	Rarely mutated in samples (<7%)
RUNX1T1	35	33	842	0.039	Yes	1.06061	Rarely mutated in samples (<7%)
SLC4A3	40	33	842	0.039	No	1.21212	Rarely mutated in samples (<7%)
UHRF1BP1	35	33	842	0.039	No	1.06061	Rarely mutated in samples (<7%)
CFAP61	36	33	842	0.039	No	1.09091	Rarely mutated in samples (<7%)
SMARCC2	39	33	842	0.039	No	1.18182	Rarely mutated in samples (<7%)
CHST8	34	33	842	0.039	No	1.0303	Rarely mutated in samples (<7%)
PKN3	35	33	842	0.039	No	1.06061	Rarely mutated in samples (<7%)
FAM83H	36	33	842	0.039	No	1.09091	Rarely mutated in samples (<7%)
RXFP3	38	33	842	0.039	No	1.15152	Rarely mutated in samples (<7%)
RHOT2	26	24	619	0.039	No	1.08333	Rarely mutated in samples (<7%)
ZNF107	42	33	842	0.039	No	1.27273	Rarely mutated in samples (<7%)
EGFLAM	35	33	842	0.039	No	1.06061	Rarely mutated in samples (<7%)
RGS3	37	33	842	0.039	No	1.12121	Rarely mutated in samples (<7%)
NCAM2	42	33	842	0.039	No	1.27273	Rarely mutated in samples (<7%)
BPTF	36	33	842	0.039	No	1.09091	Rarely mutated in samples (<7%)
RSF1	39	33	842	0.039	No	1.18182	Rarely mutated in samples (<7%)
KCNU1	44	33	842	0.039	No	1.33333	Rarely mutated in samples (<7%)
CDH16	33	32	842	0.038	No	1.03125	Rarely mutated in samples (<7%)
ANO3	36	32	842	0.038	No	1.125	Rarely mutated in samples (<7%)
CYFIP2	35	32	842	0.038	No	1.09375	Rarely mutated in samples (<7%)
KIF1B	35	32	842	0.038	No	1.09375	Rarely mutated in samples (<7%)
ADAM30	34	32	842	0.038	No	1.0625	Rarely mutated in samples (<7%)
SULF1	36	32	842	0.038	No	1.125	Rarely mutated in samples (<7%)
PRRC2C	34	32	842	0.038	No	1.0625	Rarely mutated in samples (<7%)
TNKS1BP1	34	32	842	0.038	No	1.0625	Rarely mutated in samples (<7%)
GSE1	35	32	842	0.038	No	1.09375	Rarely mutated in samples (<7%)
RTTN	41	32	842	0.038	No	1.28125	Rarely mutated in samples (<7%)
GAK	33	32	842	0.038	No	1.03125	Rarely mutated in samples (<7%)
MED16	35	32	842	0.038	No	1.09375	Rarely mutated in samples (<7%)
SIN3B	34	32	842	0.038	No	1.0625	Rarely mutated in samples (<7%)
SGO2	35	32	842	0.038	No	1.09375	Rarely mutated in samples (<7%)
DNMBP	38	32	842	0.038	No	1.1875	Rarely mutated in samples (<7%)
PSD2	33	32	842	0.038	No	1.03125	Rarely mutated in samples (<7%)
MINAR1	36	32	842	0.038	No	1.125	Rarely mutated in samples (<7%)
CCDC88C	33	32	842	0.038	No	1.03125	Rarely mutated in samples (<7%)
ARHGEF18	32	32	842	0.038	No	1	Rarely mutated in samples (<7%)
SRRM1	35	32	842	0.038	No	1.09375	Rarely mutated in samples (<7%)
SEZ6L	34	32	842	0.038	No	1.0625	Rarely mutated in samples (<7%)
BICRAL	33	32	842	0.038	No	1.03125	Rarely mutated in samples (<7%)
SCRIB	39	32	842	0.038	No	1.21875	Rarely mutated in samples (<7%)
PARD3B	33	32	842	0.038	No	1.03125	Rarely mutated in samples (<7%)
GRIA1	38	32	842	0.038	No	1.1875	Rarely mutated in samples (<7%)
DHX35	32	32	842	0.038	No	1	Rarely mutated in samples (<7%)
CEMIP2	37	32	842	0.038	No	1.15625	Rarely mutated in samples (<7%)
TUBGCP3	34	32	842	0.038	No	1.0625	Rarely mutated in samples (<7%)
CEMIP	36	32	842	0.038	No	1.125	Rarely mutated in samples (<7%)
CCDC141	40	32	842	0.038	No	1.25	Rarely mutated in samples (<7%)
NUP107	34	32	842	0.038	No	1.0625	Rarely mutated in samples (<7%)
SALL4	35	32	842	0.038	Yes	1.09375	Rarely mutated in samples (<7%)
PCDHGA9	36	32	842	0.038	No	1.125	Rarely mutated in samples (<7%)
PCDHGB6	41	32	842	0.038	No	1.28125	Rarely mutated in samples (<7%)
ZNF626	33	32	842	0.038	No	1.03125	Rarely mutated in samples (<7%)
LATS1	35	32	842	0.038	Yes	1.09375	Rarely mutated in samples (<7%)
SCAF11	38	32	842	0.038	No	1.1875	Rarely mutated in samples (<7%)
CLSTN1	34	32	842	0.038	No	1.0625	Rarely mutated in samples (<7%)
USP19	33	32	842	0.038	No	1.03125	Rarely mutated in samples (<7%)
PITPNM2	35	32	842	0.038	No	1.09375	Rarely mutated in samples (<7%)
POP1	34	32	842	0.038	No	1.0625	Rarely mutated in samples (<7%)
SCUBE2	33	32	842	0.038	No	1.03125	Rarely mutated in samples (<7%)
ALPK1	34	32	842	0.038	No	1.0625	Rarely mutated in samples (<7%)
AKAP17A	32	32	842	0.038	No	1	Rarely mutated in samples (<7%)
IRX1	34	32	842	0.038	No	1.0625	Rarely mutated in samples (<7%)
CILP2	39	32	842	0.038	No	1.21875	Rarely mutated in samples (<7%)
GCC2	36	32	842	0.038	No	1.125	Rarely mutated in samples (<7%)
ESPL1	37	32	842	0.038	No	1.15625	Rarely mutated in samples (<7%)
RIPK4	32	32	842	0.038	No	1	Rarely mutated in samples (<7%)
ADCY1	36	32	842	0.038	No	1.125	Rarely mutated in samples (<7%)
DHX38	34	32	842	0.038	No	1.0625	Rarely mutated in samples (<7%)
SAP130	32	32	842	0.038	No	1	Rarely mutated in samples (<7%)
CHST1	37	32	842	0.038	No	1.15625	Rarely mutated in samples (<7%)
DGKD	34	32	842	0.038	No	1.0625	Rarely mutated in samples (<7%)
ZBED4	33	32	842	0.038	No	1.03125	Rarely mutated in samples (<7%)
XAB2	34	32	842	0.038	No	1.0625	Rarely mutated in samples (<7%)
NCAPD2	36	32	842	0.038	No	1.125	Rarely mutated in samples (<7%)
B4GALNT4	37	32	842	0.038	No	1.15625	Rarely mutated in samples (<7%)
ARHGAP4	33	32	842	0.038	No	1.03125	Rarely mutated in samples (<7%)
FGD6	37	32	842	0.038	No	1.15625	Rarely mutated in samples (<7%)
SRCIN1	34	32	842	0.038	No	1.0625	Rarely mutated in samples (<7%)
NOL6	34	32	842	0.038	No	1.0625	Rarely mutated in samples (<7%)
ARHGEF7	36	32	842	0.038	No	1.125	Rarely mutated in samples (<7%)
CLSTN2	33	32	842	0.038	No	1.03125	Rarely mutated in samples (<7%)
LVRN	36	32	842	0.038	No	1.125	Rarely mutated in samples (<7%)
MGAM	39	32	842	0.038	Yes	1.21875	Rarely mutated in samples (<7%)
ATAD5	38	32	842	0.038	No	1.1875	Rarely mutated in samples (<7%)
ADAMTS19	36	32	842	0.038	No	1.125	Rarely mutated in samples (<7%)
CACNA1F	35	32	842	0.038	No	1.09375	Rarely mutated in samples (<7%)
SFSWAP	33	32	842	0.038	No	1.03125	Rarely mutated in samples (<7%)
XYLT2	40	32	842	0.038	No	1.25	Rarely mutated in samples (<7%)
MIDEAS	33	32	842	0.038	Yes	1.03125	Rarely mutated in samples (<7%)
RHBDF1	33	32	842	0.038	No	1.03125	Rarely mutated in samples (<7%)
KIAA2026	41	32	842	0.038	No	1.28125	Rarely mutated in samples (<7%)
PHF2	35	32	842	0.038	No	1.09375	Rarely mutated in samples (<7%)
GIGYF2	37	32	842	0.038	No	1.15625	Rarely mutated in samples (<7%)
SNAPC4	35	32	842	0.038	No	1.09375	Rarely mutated in samples (<7%)
LMO7	38	32	842	0.038	No	1.1875	Rarely mutated in samples (<7%)
TMEM132A	32	32	842	0.038	No	1	Rarely mutated in samples (<7%)
ATRNL1	33	32	842	0.038	No	1.03125	Rarely mutated in samples (<7%)
CIITA	39	32	842	0.038	Yes	1.21875	Rarely mutated in samples (<7%)
PTPN13	45	32	842	0.038	Yes	1.40625	Rarely mutated in samples (<7%)
PTPRN2	34	32	842	0.038	No	1.0625	Rarely mutated in samples (<7%)
C10ORF90	39	32	842	0.038	No	1.21875	Rarely mutated in samples (<7%)
PLEKHG2	32	32	842	0.038	No	1	Rarely mutated in samples (<7%)
RBBP6	38	32	842	0.038	No	1.1875	Rarely mutated in samples (<7%)
HSPA1L	33	32	842	0.038	No	1.03125	Rarely mutated in samples (<7%)
EPHB1	40	37	980	0.038	Yes	1.08108	Rarely mutated in samples (<7%)
COL5A3	39	32	842	0.038	No	1.21875	Rarely mutated in samples (<7%)
OCA2	35	32	842	0.038	No	1.09375	Rarely mutated in samples (<7%)
ITGAL	34	31	842	0.037	No	1.09677	Rarely mutated in samples (<7%)
KCNA1	35	31	842	0.037	No	1.12903	Rarely mutated in samples (<7%)
KCNH1	35	31	842	0.037	No	1.12903	Rarely mutated in samples (<7%)
ARID5B	34	31	842	0.037	Yes	1.09677	Rarely mutated in samples (<7%)
ZCCHC14	34	31	842	0.037	No	1.09677	Rarely mutated in samples (<7%)
CNTNAP4	31	31	842	0.037	No	1	Rarely mutated in samples (<7%)
ACTN1	32	31	842	0.037	No	1.03226	Rarely mutated in samples (<7%)
WDR62	34	31	842	0.037	No	1.09677	Rarely mutated in samples (<7%)
CYFIP1	33	31	842	0.037	No	1.06452	Rarely mutated in samples (<7%)
OLFML2B	35	31	842	0.037	No	1.12903	Rarely mutated in samples (<7%)
PLK3	33	31	842	0.037	No	1.06452	Rarely mutated in samples (<7%)
RPGRIP1L	34	31	842	0.037	No	1.09677	Rarely mutated in samples (<7%)
AGAP3	32	31	842	0.037	No	1.03226	Rarely mutated in samples (<7%)
TUT4	38	31	842	0.037	No	1.22581	Rarely mutated in samples (<7%)
DENND2C	32	31	842	0.037	No	1.03226	Rarely mutated in samples (<7%)
RPRD2	32	31	842	0.037	No	1.03226	Rarely mutated in samples (<7%)
COBL	34	31	842	0.037	No	1.09677	Rarely mutated in samples (<7%)
SEMA3D	36	31	842	0.037	No	1.16129	Rarely mutated in samples (<7%)
TTC21A	32	31	842	0.037	No	1.03226	Rarely mutated in samples (<7%)
CPS1	36	31	842	0.037	Yes	1.16129	Rarely mutated in samples (<7%)
ECPAS	36	31	842	0.037	No	1.16129	Rarely mutated in samples (<7%)
GLG1	33	31	842	0.037	No	1.06452	Rarely mutated in samples (<7%)
CTNNA1	36	31	842	0.037	Yes	1.16129	Rarely mutated in samples (<7%)
CTBP2	25	23	619	0.037	No	1.08696	Rarely mutated in samples (<7%)
TOPORS	33	31	842	0.037	No	1.06452	Rarely mutated in samples (<7%)
CFAP47	38	31	842	0.037	No	1.22581	Rarely mutated in samples (<7%)
DOT1L	32	31	842	0.037	Yes	1.03226	Rarely mutated in samples (<7%)
GRIK4	37	31	842	0.037	No	1.19355	Rarely mutated in samples (<7%)
AGBL5	32	31	842	0.037	No	1.03226	Rarely mutated in samples (<7%)
SEC24B	32	31	842	0.037	No	1.03226	Rarely mutated in samples (<7%)
SARDH	31	31	842	0.037	No	1	Rarely mutated in samples (<7%)
THOC2	37	31	842	0.037	No	1.19355	Rarely mutated in samples (<7%)
ADGRA3	34	31	842	0.037	No	1.09677	Rarely mutated in samples (<7%)
SLC26A9	32	31	842	0.037	No	1.03226	Rarely mutated in samples (<7%)
ZBTB45	26	23	619	0.037	No	1.13043	Rarely mutated in samples (<7%)
USP6	37	31	842	0.037	Yes	1.19355	Rarely mutated in samples (<7%)
PCDHGB2	33	31	842	0.037	No	1.06452	Rarely mutated in samples (<7%)
NUDCD1	31	31	842	0.037	No	1	Rarely mutated in samples (<7%)
MORC2	33	31	842	0.037	No	1.06452	Rarely mutated in samples (<7%)
ARHGAP31	35	31	842	0.037	No	1.12903	Rarely mutated in samples (<7%)
CD109	37	31	842	0.037	No	1.19355	Rarely mutated in samples (<7%)
ALDH1L1	33	31	842	0.037	No	1.06452	Rarely mutated in samples (<7%)
CRACD	33	31	842	0.037	No	1.06452	Rarely mutated in samples (<7%)
PLEKHG1	33	31	842	0.037	No	1.06452	Rarely mutated in samples (<7%)
USP28	31	31	842	0.037	No	1	Rarely mutated in samples (<7%)
ZNF445	32	31	842	0.037	No	1.03226	Rarely mutated in samples (<7%)
DHX30	33	31	842	0.037	No	1.06452	Rarely mutated in samples (<7%)
PLIN4	31	31	842	0.037	No	1	Rarely mutated in samples (<7%)
SLC6A15	35	31	842	0.037	No	1.12903	Rarely mutated in samples (<7%)
KCNQ5	33	31	842	0.037	No	1.06452	Rarely mutated in samples (<7%)
ADGRD1	32	31	842	0.037	No	1.03226	Rarely mutated in samples (<7%)
PRX	33	31	842	0.037	No	1.06452	Rarely mutated in samples (<7%)
NCOA5	31	31	842	0.037	No	1	Rarely mutated in samples (<7%)
CCT8L2	31	31	842	0.037	No	1	Rarely mutated in samples (<7%)
ROCK2	36	31	842	0.037	No	1.16129	Rarely mutated in samples (<7%)
ARHGAP30	31	31	842	0.037	No	1	Rarely mutated in samples (<7%)
SNX29	32	31	842	0.037	Yes	1.03226	Rarely mutated in samples (<7%)
SOGA1	33	31	842	0.037	No	1.06452	Rarely mutated in samples (<7%)
BICC1	36	31	842	0.037	No	1.16129	Rarely mutated in samples (<7%)
NWD1	35	31	842	0.037	No	1.12903	Rarely mutated in samples (<7%)
SH3PXD2A	32	31	842	0.037	No	1.03226	Rarely mutated in samples (<7%)
RAPGEF2	38	31	842	0.037	No	1.22581	Rarely mutated in samples (<7%)
SLC9C2	40	31	842	0.037	No	1.29032	Rarely mutated in samples (<7%)
CTNNA3	35	31	842	0.037	No	1.12903	Rarely mutated in samples (<7%)
ADAMTS10	33	31	842	0.037	No	1.06452	Rarely mutated in samples (<7%)
HDAC9	36	31	842	0.037	No	1.16129	Rarely mutated in samples (<7%)
IFT140	34	31	842	0.037	No	1.09677	Rarely mutated in samples (<7%)
ADCY7	31	31	842	0.037	No	1	Rarely mutated in samples (<7%)
HDAC4	35	31	842	0.037	Yes	1.12903	Rarely mutated in samples (<7%)
PARP4	40	31	842	0.037	No	1.29032	Rarely mutated in samples (<7%)
ATRN	33	31	842	0.037	No	1.06452	Rarely mutated in samples (<7%)
SBF2	34	31	842	0.037	No	1.09677	Rarely mutated in samples (<7%)
TRPC6	36	31	842	0.037	No	1.16129	Rarely mutated in samples (<7%)
AMPD3	35	31	842	0.037	No	1.12903	Rarely mutated in samples (<7%)
SLC25A6	28	23	619	0.037	No	1.21739	Rarely mutated in samples (<7%)
DDX60	38	31	842	0.037	No	1.22581	Rarely mutated in samples (<7%)
SGSM2	34	31	842	0.037	No	1.09677	Rarely mutated in samples (<7%)
SLC4A4	33	31	842	0.037	No	1.06452	Rarely mutated in samples (<7%)
ARHGAP39	25	23	619	0.037	No	1.08696	Rarely mutated in samples (<7%)
AXL	36	31	842	0.037	Yes	1.16129	Rarely mutated in samples (<7%)
ADAMTSL4	38	31	842	0.037	No	1.22581	Rarely mutated in samples (<7%)
PPP2R3B	25	23	619	0.037	No	1.08696	Rarely mutated in samples (<7%)
KLHL17	25	23	619	0.037	No	1.08696	Rarely mutated in samples (<7%)
LRRN3	38	31	842	0.037	No	1.22581	Rarely mutated in samples (<7%)
ZNF99	42	31	842	0.037	No	1.35484	Rarely mutated in samples (<7%)
SCN7A	39	31	842	0.037	No	1.25806	Rarely mutated in samples (<7%)
C5	36	31	842	0.037	No	1.16129	Rarely mutated in samples (<7%)
FMNL1	32	31	842	0.037	No	1.03226	Rarely mutated in samples (<7%)
SYNPO2	38	31	842	0.037	No	1.22581	Rarely mutated in samples (<7%)
SKIV2L	32	31	842	0.037	No	1.03226	Rarely mutated in samples (<7%)
PGM5	33	31	842	0.037	No	1.06452	Rarely mutated in samples (<7%)
TRPM7	40	31	842	0.037	No	1.29032	Rarely mutated in samples (<7%)
UBN1	32	31	842	0.037	No	1.03226	Rarely mutated in samples (<7%)
BAG6	32	31	842	0.037	No	1.03226	Rarely mutated in samples (<7%)
SPG7	31	31	842	0.037	No	1	Rarely mutated in samples (<7%)
PLK1	33	31	842	0.037	No	1.06452	Rarely mutated in samples (<7%)
OSBPL3	32	31	842	0.037	No	1.03226	Rarely mutated in samples (<7%)
MCC	35	31	842	0.037	No	1.12903	Rarely mutated in samples (<7%)
GZF1	36	31	842	0.037	No	1.16129	Rarely mutated in samples (<7%)
TMEM168	34	31	842	0.037	No	1.09677	Rarely mutated in samples (<7%)
PHF20L1	36	31	842	0.037	No	1.16129	Rarely mutated in samples (<7%)
SYCP1	44	31	842	0.037	No	1.41935	Rarely mutated in samples (<7%)
MAP3K1	39	31	842	0.037	Yes	1.25806	Rarely mutated in samples (<7%)
CAMSAP1	39	31	842	0.037	No	1.25806	Rarely mutated in samples (<7%)
MMP16	32	31	842	0.037	No	1.03226	Rarely mutated in samples (<7%)
CFH	39	31	842	0.037	No	1.25806	Rarely mutated in samples (<7%)
TMPRSS9	37	31	842	0.037	No	1.19355	Rarely mutated in samples (<7%)
HLA-B	39	31	842	0.037	Yes	1.25806	Rarely mutated in samples (<7%)
ITIH6	32	31	842	0.037	No	1.03226	Rarely mutated in samples (<7%)
FNDC3B	34	31	842	0.037	No	1.09677	Rarely mutated in samples (<7%)
ADAMTS17	32	31	842	0.037	No	1.03226	Rarely mutated in samples (<7%)
MYO1A	37	31	842	0.037	No	1.19355	Rarely mutated in samples (<7%)
MYO7B	32	31	842	0.037	No	1.03226	Rarely mutated in samples (<7%)
NELL2	39	31	842	0.037	No	1.25806	Rarely mutated in samples (<7%)
ITGA3	36	30	842	0.036	No	1.2	Rarely mutated in samples (<7%)
ITGAV	37	30	842	0.036	No	1.23333	Rarely mutated in samples (<7%)
ITIH2	32	30	842	0.036	No	1.06667	Rarely mutated in samples (<7%)
SYDE1	33	30	842	0.036	No	1.1	Rarely mutated in samples (<7%)
CFTR	34	30	842	0.036	No	1.13333	Rarely mutated in samples (<7%)
ZSWIM8	31	30	842	0.036	No	1.03333	Rarely mutated in samples (<7%)
KCNA5	30	30	842	0.036	No	1	Rarely mutated in samples (<7%)
KIF5A	37	30	842	0.036	No	1.23333	Rarely mutated in samples (<7%)
MPRIP	34	30	842	0.036	No	1.13333	Rarely mutated in samples (<7%)
CEP250	37	30	842	0.036	No	1.23333	Rarely mutated in samples (<7%)
SUPT16H	32	30	842	0.036	No	1.06667	Rarely mutated in samples (<7%)
DISP2	32	30	842	0.036	No	1.06667	Rarely mutated in samples (<7%)
MYOM3	34	30	842	0.036	No	1.13333	Rarely mutated in samples (<7%)
TNRC6B	32	30	842	0.036	No	1.06667	Rarely mutated in samples (<7%)
GABRB3	32	30	842	0.036	No	1.06667	Rarely mutated in samples (<7%)
CLASP1	30	30	842	0.036	No	1	Rarely mutated in samples (<7%)
SNED1	31	30	842	0.036	No	1.03333	Rarely mutated in samples (<7%)
GEMIN5	34	30	842	0.036	No	1.13333	Rarely mutated in samples (<7%)
LAMC1	33	30	842	0.036	No	1.1	Rarely mutated in samples (<7%)
MYO3B	36	30	842	0.036	No	1.2	Rarely mutated in samples (<7%)
GLI1	33	30	842	0.036	Yes	1.1	Rarely mutated in samples (<7%)
ZFYVE26	34	30	842	0.036	No	1.13333	Rarely mutated in samples (<7%)
FRMPD3	31	30	842	0.036	No	1.03333	Rarely mutated in samples (<7%)
GPR6	32	30	842	0.036	No	1.06667	Rarely mutated in samples (<7%)
COL25A1	34	30	842	0.036	No	1.13333	Rarely mutated in samples (<7%)
ACE	32	30	842	0.036	No	1.06667	Rarely mutated in samples (<7%)
GUCY2C	31	30	842	0.036	No	1.03333	Rarely mutated in samples (<7%)
TSHZ2	32	30	842	0.036	No	1.06667	Rarely mutated in samples (<7%)
KNL1	37	30	842	0.036	Yes	1.23333	Rarely mutated in samples (<7%)
DLG2	33	30	842	0.036	No	1.1	Rarely mutated in samples (<7%)
DOCK1	33	30	842	0.036	No	1.1	Rarely mutated in samples (<7%)
NEBL	32	30	842	0.036	No	1.06667	Rarely mutated in samples (<7%)
SCAF1	35	30	842	0.036	No	1.16667	Rarely mutated in samples (<7%)
TRPC7	31	30	842	0.036	No	1.03333	Rarely mutated in samples (<7%)
VARS2	30	30	842	0.036	No	1	Rarely mutated in samples (<7%)
MASTL	31	30	842	0.036	No	1.03333	Rarely mutated in samples (<7%)
CORIN	33	30	842	0.036	No	1.1	Rarely mutated in samples (<7%)
EGR1	31	30	842	0.036	Yes	1.03333	Rarely mutated in samples (<7%)
BAZ1B	36	30	842	0.036	No	1.2	Rarely mutated in samples (<7%)
BTAF1	36	30	842	0.036	No	1.2	Rarely mutated in samples (<7%)
CHL1	36	30	842	0.036	No	1.2	Rarely mutated in samples (<7%)
STAG3	35	30	842	0.036	No	1.16667	Rarely mutated in samples (<7%)
PCDHGB7	37	30	842	0.036	No	1.23333	Rarely mutated in samples (<7%)
UBR1	37	30	842	0.036	No	1.23333	Rarely mutated in samples (<7%)
LENG8	34	30	842	0.036	No	1.13333	Rarely mutated in samples (<7%)
CGN	32	30	842	0.036	No	1.06667	Rarely mutated in samples (<7%)
ZMYM3	32	30	842	0.036	Yes	1.06667	Rarely mutated in samples (<7%)
USP54	33	30	842	0.036	No	1.1	Rarely mutated in samples (<7%)
PCDHB4	30	30	842	0.036	No	1	Rarely mutated in samples (<7%)
MYORG	33	30	842	0.036	No	1.1	Rarely mutated in samples (<7%)
LRFN2	33	30	842	0.036	No	1.1	Rarely mutated in samples (<7%)
KIDINS220	34	30	842	0.036	No	1.13333	Rarely mutated in samples (<7%)
USP29	37	30	842	0.036	No	1.23333	Rarely mutated in samples (<7%)
ALS2	35	30	842	0.036	No	1.16667	Rarely mutated in samples (<7%)
TNRC6C	31	30	842	0.036	No	1.03333	Rarely mutated in samples (<7%)
SLC4A11	32	30	842	0.036	No	1.06667	Rarely mutated in samples (<7%)
CD93	34	30	842	0.036	No	1.13333	Rarely mutated in samples (<7%)
ATG2B	33	30	842	0.036	No	1.1	Rarely mutated in samples (<7%)
DDX23	34	30	842	0.036	No	1.13333	Rarely mutated in samples (<7%)
CTTNBP2	36	30	842	0.036	No	1.2	Rarely mutated in samples (<7%)
KLHDC7A	34	30	842	0.036	No	1.13333	Rarely mutated in samples (<7%)
NCOA3	36	30	842	0.036	Yes	1.2	Rarely mutated in samples (<7%)
CTCFL	34	30	842	0.036	No	1.13333	Rarely mutated in samples (<7%)
KDM5C	33	30	842	0.036	Yes	1.1	Rarely mutated in samples (<7%)
SMC1A	30	30	842	0.036	Yes	1	Rarely mutated in samples (<7%)
RESF1	34	30	842	0.036	No	1.13333	Rarely mutated in samples (<7%)
MTSS2	23	22	619	0.036	No	1.04545	Rarely mutated in samples (<7%)
MIS18BP1	33	30	842	0.036	No	1.1	Rarely mutated in samples (<7%)
ATAD2	34	30	842	0.036	No	1.13333	Rarely mutated in samples (<7%)
LGR4	33	30	842	0.036	No	1.1	Rarely mutated in samples (<7%)
PABPC1L	32	30	842	0.036	No	1.06667	Rarely mutated in samples (<7%)
STYXL2	33	30	842	0.036	No	1.1	Rarely mutated in samples (<7%)
TLE4	33	30	842	0.036	Yes	1.1	Rarely mutated in samples (<7%)
SLCO5A1	33	30	842	0.036	No	1.1	Rarely mutated in samples (<7%)
ST18	36	30	842	0.036	No	1.2	Rarely mutated in samples (<7%)
GPRASP1	34	30	842	0.036	No	1.13333	Rarely mutated in samples (<7%)
AEBP1	30	30	842	0.036	No	1	Rarely mutated in samples (<7%)
CD163L1	34	30	842	0.036	No	1.13333	Rarely mutated in samples (<7%)
RNF128	22	22	619	0.036	No	1	Rarely mutated in samples (<7%)
TRO	30	30	842	0.036	No	1	Rarely mutated in samples (<7%)
NUP210L	38	30	842	0.036	No	1.26667	Rarely mutated in samples (<7%)
TUT7	33	30	842	0.036	No	1.1	Rarely mutated in samples (<7%)
SLC23A2	31	30	842	0.036	No	1.03333	Rarely mutated in samples (<7%)
APLP1	31	30	842	0.036	No	1.03333	Rarely mutated in samples (<7%)
NCOA1	32	30	842	0.036	Yes	1.06667	Rarely mutated in samples (<7%)
RNF6	34	30	842	0.036	No	1.13333	Rarely mutated in samples (<7%)
INTS5	32	30	842	0.036	No	1.06667	Rarely mutated in samples (<7%)
ATF7IP	33	30	842	0.036	No	1.1	Rarely mutated in samples (<7%)
NLRP9	32	30	842	0.036	No	1.06667	Rarely mutated in samples (<7%)
MBTPS1	36	30	842	0.036	No	1.2	Rarely mutated in samples (<7%)
ACAD10	31	30	842	0.036	No	1.03333	Rarely mutated in samples (<7%)
ADGRB1	34	30	842	0.036	No	1.13333	Rarely mutated in samples (<7%)
BDP1	40	30	842	0.036	No	1.33333	Rarely mutated in samples (<7%)
BNC1	37	30	842	0.036	No	1.23333	Rarely mutated in samples (<7%)
ZNF90	23	22	619	0.036	No	1.04545	Rarely mutated in samples (<7%)
PAM	32	30	842	0.036	No	1.06667	Rarely mutated in samples (<7%)
PC	36	30	842	0.036	Yes	1.2	Rarely mutated in samples (<7%)
ZNF808	32	30	842	0.036	No	1.06667	Rarely mutated in samples (<7%)
SEMA3F	30	30	842	0.036	No	1	Rarely mutated in samples (<7%)
CACNA2D1	33	30	842	0.036	No	1.1	Rarely mutated in samples (<7%)
BNC2	36	30	842	0.036	No	1.2	Rarely mutated in samples (<7%)
KIF9	32	30	842	0.036	No	1.06667	Rarely mutated in samples (<7%)
PDE3A	31	30	842	0.036	No	1.03333	Rarely mutated in samples (<7%)
MAP3K15	33	30	842	0.036	No	1.1	Rarely mutated in samples (<7%)
CASR	35	30	842	0.036	No	1.16667	Rarely mutated in samples (<7%)
ABCB1	33	30	842	0.036	No	1.1	Rarely mutated in samples (<7%)
PHKB	31	30	842	0.036	No	1.03333	Rarely mutated in samples (<7%)
GPR78	23	22	619	0.036	No	1.04545	Rarely mutated in samples (<7%)
COL28A1	34	30	842	0.036	No	1.13333	Rarely mutated in samples (<7%)
EDRF1	31	30	842	0.036	No	1.03333	Rarely mutated in samples (<7%)
PLCL1	34	30	842	0.036	No	1.13333	Rarely mutated in samples (<7%)
SOS2	34	30	842	0.036	No	1.13333	Rarely mutated in samples (<7%)
LOXL2	32	30	842	0.036	No	1.06667	Rarely mutated in samples (<7%)
DNAAF5	30	30	842	0.036	No	1	Rarely mutated in samples (<7%)
TRHDE	34	30	842	0.036	No	1.13333	Rarely mutated in samples (<7%)
TNRC6A	40	30	842	0.036	No	1.33333	Rarely mutated in samples (<7%)
TTLL3	23	22	619	0.036	No	1.04545	Rarely mutated in samples (<7%)
MLH1	33	30	842	0.036	Yes	1.1	Rarely mutated in samples (<7%)
CRIM1	33	30	842	0.036	No	1.1	Rarely mutated in samples (<7%)
MMP9	34	30	842	0.036	No	1.13333	Rarely mutated in samples (<7%)
UROC1	32	30	842	0.036	No	1.06667	Rarely mutated in samples (<7%)
ZBTB7A	31	30	842	0.036	Yes	1.03333	Rarely mutated in samples (<7%)
HIPK1	33	30	842	0.036	No	1.1	Rarely mutated in samples (<7%)
PTK7	32	30	842	0.036	Yes	1.06667	Rarely mutated in samples (<7%)
MST1R	31	30	842	0.036	Yes	1.03333	Rarely mutated in samples (<7%)
MAGEC2	30	30	842	0.036	No	1	Rarely mutated in samples (<7%)
MICAL1	30	30	842	0.036	No	1	Rarely mutated in samples (<7%)
SLC44A5	34	30	842	0.036	No	1.13333	Rarely mutated in samples (<7%)
MTTP	32	30	842	0.036	No	1.06667	Rarely mutated in samples (<7%)
ANO4	33	30	842	0.036	No	1.1	Rarely mutated in samples (<7%)
MYH1	42	30	842	0.036	No	1.4	Rarely mutated in samples (<7%)
MYO1D	34	30	842	0.036	No	1.13333	Rarely mutated in samples (<7%)
HTR1A	32	30	842	0.036	No	1.06667	Rarely mutated in samples (<7%)
ENPEP	31	30	842	0.036	No	1.03333	Rarely mutated in samples (<7%)
EPHA8	38	35	980	0.036	No	1.08571	Rarely mutated in samples (<7%)
EPRS1	34	30	842	0.036	No	1.13333	Rarely mutated in samples (<7%)
NRK	34	30	842	0.036	No	1.13333	Rarely mutated in samples (<7%)
NEO1	31	30	842	0.036	No	1.03333	Rarely mutated in samples (<7%)
EXTL3	33	30	842	0.036	No	1.1	Rarely mutated in samples (<7%)
PTK2B	31	30	842	0.036	No	1.03333	Rarely mutated in samples (<7%)
FES	24	22	619	0.036	Yes	1.09091	Rarely mutated in samples (<7%)
FRMPD2	30	30	842	0.036	No	1	Rarely mutated in samples (<7%)
TERT	34	34	980	0.035	Yes	1	Rarely mutated in samples (<7%)
NTRK3	37	34	980	0.035	Yes	1.08824	Rarely mutated in samples (<7%)
FLII	33	29	842	0.034	No	1.13793	Rarely mutated in samples (<7%)
CDH6	32	29	842	0.034	No	1.10345	Rarely mutated in samples (<7%)
ITGAD	32	29	842	0.034	No	1.10345	Rarely mutated in samples (<7%)
ITGA7	31	29	842	0.034	No	1.06897	Rarely mutated in samples (<7%)
EIF2AK4	31	29	842	0.034	No	1.06897	Rarely mutated in samples (<7%)
FHIP1B	30	29	842	0.034	No	1.03448	Rarely mutated in samples (<7%)
KANSL1L	30	29	842	0.034	No	1.03448	Rarely mutated in samples (<7%)
CMTR1	33	29	842	0.034	No	1.13793	Rarely mutated in samples (<7%)
UHRF1BP1L	31	29	842	0.034	No	1.06897	Rarely mutated in samples (<7%)
XPO6	30	29	842	0.034	No	1.03448	Rarely mutated in samples (<7%)
AKAP11	34	29	842	0.034	No	1.17241	Rarely mutated in samples (<7%)
ADAMTS7	22	21	619	0.034	No	1.04762	Rarely mutated in samples (<7%)
ITPRIP	29	29	842	0.034	No	1	Rarely mutated in samples (<7%)
MCF2L2	43	29	842	0.034	No	1.48276	Rarely mutated in samples (<7%)
TBC1D2B	31	29	842	0.034	No	1.06897	Rarely mutated in samples (<7%)
ZNF737	23	21	619	0.034	No	1.09524	Rarely mutated in samples (<7%)
HEXD	22	21	619	0.034	No	1.04762	Rarely mutated in samples (<7%)
CDON	32	29	842	0.034	No	1.10345	Rarely mutated in samples (<7%)
IQSEC3	31	29	842	0.034	No	1.06897	Rarely mutated in samples (<7%)
PDE11A	31	29	842	0.034	No	1.06897	Rarely mutated in samples (<7%)
DDX42	30	29	842	0.034	No	1.03448	Rarely mutated in samples (<7%)
KANK2	30	29	842	0.034	No	1.03448	Rarely mutated in samples (<7%)
XPOT	33	29	842	0.034	No	1.13793	Rarely mutated in samples (<7%)
LIG3	31	29	842	0.034	No	1.06897	Rarely mutated in samples (<7%)
TSKS	30	29	842	0.034	No	1.03448	Rarely mutated in samples (<7%)
DAAM2	31	29	842	0.034	No	1.06897	Rarely mutated in samples (<7%)
TSHZ1	34	29	842	0.034	No	1.17241	Rarely mutated in samples (<7%)
GRIA2	33	29	842	0.034	No	1.13793	Rarely mutated in samples (<7%)
BRD1	30	29	842	0.034	No	1.03448	Rarely mutated in samples (<7%)
NIBAN1	31	29	842	0.034	No	1.06897	Rarely mutated in samples (<7%)
ST6GAL2	32	29	842	0.034	No	1.10345	Rarely mutated in samples (<7%)
KIRREL3	30	29	842	0.034	No	1.03448	Rarely mutated in samples (<7%)
DNMT3A	35	29	842	0.034	Yes	1.2069	Rarely mutated in samples (<7%)
ATP10D	37	29	842	0.034	No	1.27586	Rarely mutated in samples (<7%)
VANGL2	30	29	842	0.034	No	1.03448	Rarely mutated in samples (<7%)
DYRK1A	31	29	842	0.034	No	1.06897	Rarely mutated in samples (<7%)
PAXBP1	33	29	842	0.034	No	1.13793	Rarely mutated in samples (<7%)
POSTN	34	29	842	0.034	No	1.17241	Rarely mutated in samples (<7%)
PCDHB10	32	29	842	0.034	No	1.10345	Rarely mutated in samples (<7%)
PCDHB13	29	29	842	0.034	No	1	Rarely mutated in samples (<7%)
SMC3	32	29	842	0.034	Yes	1.10345	Rarely mutated in samples (<7%)
MAP3K13	30	29	842	0.034	Yes	1.03448	Rarely mutated in samples (<7%)
ARHGEF2	29	29	842	0.034	No	1	Rarely mutated in samples (<7%)
DZIP1	42	29	842	0.034	No	1.44828	Rarely mutated in samples (<7%)
SLC16A7	32	29	842	0.034	No	1.10345	Rarely mutated in samples (<7%)
ZHX2	30	29	842	0.034	No	1.03448	Rarely mutated in samples (<7%)
ANKRD26	38	29	842	0.034	No	1.31034	Rarely mutated in samples (<7%)
TMTC1	33	29	842	0.034	No	1.13793	Rarely mutated in samples (<7%)
CEP164	31	29	842	0.034	No	1.06897	Rarely mutated in samples (<7%)
LARGE1	30	29	842	0.034	No	1.03448	Rarely mutated in samples (<7%)
TAS1R3	26	21	619	0.034	No	1.2381	Rarely mutated in samples (<7%)
XRN2	34	29	842	0.034	No	1.17241	Rarely mutated in samples (<7%)
TEX14	35	29	842	0.034	No	1.2069	Rarely mutated in samples (<7%)
BEND3	31	29	842	0.034	No	1.06897	Rarely mutated in samples (<7%)
TRAK1	30	29	842	0.034	No	1.03448	Rarely mutated in samples (<7%)
CRTAC1	29	29	842	0.034	No	1	Rarely mutated in samples (<7%)
NLRP3	35	29	842	0.034	No	1.2069	Rarely mutated in samples (<7%)
RECQL5	30	29	842	0.034	No	1.03448	Rarely mutated in samples (<7%)
ECEL1	23	21	619	0.034	No	1.09524	Rarely mutated in samples (<7%)
ARHGEF6	37	29	842	0.034	No	1.27586	Rarely mutated in samples (<7%)
NRDE2	31	29	842	0.034	No	1.06897	Rarely mutated in samples (<7%)
NAT10	30	29	842	0.034	No	1.03448	Rarely mutated in samples (<7%)
HKDC1	30	29	842	0.034	No	1.03448	Rarely mutated in samples (<7%)
BCAR1	23	21	619	0.034	No	1.09524	Rarely mutated in samples (<7%)
RC3H1	32	29	842	0.034	No	1.10345	Rarely mutated in samples (<7%)
DCDC1	35	29	842	0.034	No	1.2069	Rarely mutated in samples (<7%)
CEP290	38	29	842	0.034	No	1.31034	Rarely mutated in samples (<7%)
ELFN2	29	29	842	0.034	No	1	Rarely mutated in samples (<7%)
CEP135	32	29	842	0.034	No	1.10345	Rarely mutated in samples (<7%)
TTI1	31	29	842	0.034	No	1.06897	Rarely mutated in samples (<7%)
TFAP2B	31	29	842	0.034	No	1.06897	Rarely mutated in samples (<7%)
FHOD1	33	29	842	0.034	No	1.13793	Rarely mutated in samples (<7%)
SART3	29	29	842	0.034	No	1	Rarely mutated in samples (<7%)
ARHGAP32	29	29	842	0.034	No	1	Rarely mutated in samples (<7%)
CUL1	32	29	842	0.034	No	1.10345	Rarely mutated in samples (<7%)
CUL4B	33	29	842	0.034	No	1.13793	Rarely mutated in samples (<7%)
AGL	30	29	842	0.034	No	1.03448	Rarely mutated in samples (<7%)
TP53BP2	31	29	842	0.034	No	1.06897	Rarely mutated in samples (<7%)
EPHA10	31	29	842	0.034	No	1.06897	Rarely mutated in samples (<7%)
ANKS1B	32	29	842	0.034	No	1.10345	Rarely mutated in samples (<7%)
URB2	34	29	842	0.034	No	1.17241	Rarely mutated in samples (<7%)
CRYBG1	30	29	842	0.034	No	1.03448	Rarely mutated in samples (<7%)
ADCY4	35	29	842	0.034	No	1.2069	Rarely mutated in samples (<7%)
ELMO1	31	29	842	0.034	No	1.06897	Rarely mutated in samples (<7%)
AP3B1	32	29	842	0.034	No	1.10345	Rarely mutated in samples (<7%)
PLPPR4	29	29	842	0.034	No	1	Rarely mutated in samples (<7%)
NOP14	32	29	842	0.034	No	1.10345	Rarely mutated in samples (<7%)
SLC12A9	30	29	842	0.034	No	1.03448	Rarely mutated in samples (<7%)
GALNT14	29	29	842	0.034	No	1	Rarely mutated in samples (<7%)
PCARE	36	29	842	0.034	No	1.24138	Rarely mutated in samples (<7%)
DGCR8	31	29	842	0.034	No	1.06897	Rarely mutated in samples (<7%)
KPRP	30	29	842	0.034	No	1.03448	Rarely mutated in samples (<7%)
BTBD7	32	29	842	0.034	No	1.10345	Rarely mutated in samples (<7%)
VARS1	30	29	842	0.034	No	1.03448	Rarely mutated in samples (<7%)
ZBBX	33	29	842	0.034	No	1.13793	Rarely mutated in samples (<7%)
ATP1A2	32	29	842	0.034	No	1.10345	Rarely mutated in samples (<7%)
ATP2A1	35	29	842	0.034	No	1.2069	Rarely mutated in samples (<7%)
ATP2B4	32	29	842	0.034	No	1.10345	Rarely mutated in samples (<7%)
POLR3E	29	29	842	0.034	No	1	Rarely mutated in samples (<7%)
WDR11	31	29	842	0.034	No	1.06897	Rarely mutated in samples (<7%)
WNK2	32	29	842	0.034	No	1.10345	Rarely mutated in samples (<7%)
UBAP2	31	29	842	0.034	No	1.06897	Rarely mutated in samples (<7%)
CFB	33	29	842	0.034	No	1.13793	Rarely mutated in samples (<7%)
TIMELESS	30	29	842	0.034	No	1.03448	Rarely mutated in samples (<7%)
PRDM1	29	29	842	0.034	Yes	1	Rarely mutated in samples (<7%)
BRCA1	34	33	980	0.034	Yes	1.0303	Rarely mutated in samples (<7%)
CNTN3	30	29	842	0.034	No	1.03448	Rarely mutated in samples (<7%)
2002-08-01	32	29	842	0.034	Yes	1.10345	Rarely mutated in samples (<7%)
C6	32	29	842	0.034	No	1.10345	Rarely mutated in samples (<7%)
CFAP46	31	29	842	0.034	No	1.06897	Rarely mutated in samples (<7%)
ZMYM2	30	29	842	0.034	Yes	1.03448	Rarely mutated in samples (<7%)
LUZP1	31	29	842	0.034	No	1.06897	Rarely mutated in samples (<7%)
MORC1	34	29	842	0.034	No	1.17241	Rarely mutated in samples (<7%)
SLC1A6	31	29	842	0.034	No	1.06897	Rarely mutated in samples (<7%)
CNTLN	39	29	842	0.034	No	1.34483	Rarely mutated in samples (<7%)
SLC4A1	30	29	842	0.034	No	1.03448	Rarely mutated in samples (<7%)
FAM47B	30	29	842	0.034	No	1.03448	Rarely mutated in samples (<7%)
PFKFB3	24	21	619	0.034	No	1.14286	Rarely mutated in samples (<7%)
PFKP	29	29	842	0.034	No	1	Rarely mutated in samples (<7%)
MSLNL	22	21	619	0.034	No	1.04762	Rarely mutated in samples (<7%)
XPO4	30	29	842	0.034	No	1.03448	Rarely mutated in samples (<7%)
CAPN15	21	21	619	0.034	No	1	Rarely mutated in samples (<7%)
SOS1	31	29	842	0.034	Yes	1.06897	Rarely mutated in samples (<7%)
SMAD3	31	29	842	0.034	Yes	1.06897	Rarely mutated in samples (<7%)
LTN1	33	29	842	0.034	No	1.13793	Rarely mutated in samples (<7%)
XKR6	33	29	842	0.034	No	1.13793	Rarely mutated in samples (<7%)
IRF2BP1	21	21	619	0.034	No	1	Rarely mutated in samples (<7%)
ELOA2	31	29	842	0.034	No	1.06897	Rarely mutated in samples (<7%)
BMPER	32	29	842	0.034	No	1.10345	Rarely mutated in samples (<7%)
MN1	31	29	842	0.034	Yes	1.06897	Rarely mutated in samples (<7%)
GUCY2D	35	29	842	0.034	No	1.2069	Rarely mutated in samples (<7%)
HLA-A	33	29	842	0.034	Yes	1.13793	Rarely mutated in samples (<7%)
PTPRJ	30	29	842	0.034	No	1.03448	Rarely mutated in samples (<7%)
PALM2AKAP2	29	29	842	0.034	No	1	Rarely mutated in samples (<7%)
MST1	23	21	619	0.034	Yes	1.09524	Rarely mutated in samples (<7%)
ANKFY1	32	29	842	0.034	No	1.10345	Rarely mutated in samples (<7%)
HRC	30	29	842	0.034	No	1.03448	Rarely mutated in samples (<7%)
LATS2	34	29	842	0.034	Yes	1.17241	Rarely mutated in samples (<7%)
2001-08-01	29	29	842	0.034	Yes	1	Rarely mutated in samples (<7%)
NBAS	35	29	842	0.034	No	1.2069	Rarely mutated in samples (<7%)
RASA1	32	29	842	0.034	Yes	1.10345	Rarely mutated in samples (<7%)
MYO1C	31	29	842	0.034	No	1.06897	Rarely mutated in samples (<7%)
EPAS1	30	29	842	0.034	Yes	1.03448	Rarely mutated in samples (<7%)
HTR2C	30	29	842	0.034	No	1.03448	Rarely mutated in samples (<7%)
EPHA7	35	33	980	0.034	Yes	1.06061	Rarely mutated in samples (<7%)
EPHA1	30	29	842	0.034	No	1.03448	Rarely mutated in samples (<7%)
EPHB4	35	33	980	0.034	Yes	1.06061	Rarely mutated in samples (<7%)
ESR1	34	33	980	0.034	Yes	1.0303	Rarely mutated in samples (<7%)
LPIN3	30	29	842	0.034	No	1.03448	Rarely mutated in samples (<7%)
NELL1	32	29	842	0.034	No	1.10345	Rarely mutated in samples (<7%)
F13A1	29	29	842	0.034	No	1	Rarely mutated in samples (<7%)
USF3	38	29	842	0.034	No	1.31034	Rarely mutated in samples (<7%)
NOS3	31	29	842	0.034	No	1.06897	Rarely mutated in samples (<7%)
ING1	36	29	842	0.034	No	1.24138	Rarely mutated in samples (<7%)
OGDH	30	28	842	0.033	No	1.07143	Rarely mutated in samples (<7%)
QRICH2	29	28	842	0.033	No	1.03571	Rarely mutated in samples (<7%)
WWP2	30	28	842	0.033	No	1.07143	Rarely mutated in samples (<7%)
SPINK5	35	28	842	0.033	No	1.25	Rarely mutated in samples (<7%)
KCNA3	33	28	842	0.033	No	1.17857	Rarely mutated in samples (<7%)
ACTL9	28	28	842	0.033	No	1	Rarely mutated in samples (<7%)
SLITRK6	35	28	842	0.033	No	1.25	Rarely mutated in samples (<7%)
ABCB8	29	28	842	0.033	No	1.03571	Rarely mutated in samples (<7%)
PASK	30	28	842	0.033	Yes	1.07143	Rarely mutated in samples (<7%)
ZIC4	30	28	842	0.033	No	1.07143	Rarely mutated in samples (<7%)
DCLK3	29	28	842	0.033	No	1.03571	Rarely mutated in samples (<7%)
ACTN4	29	28	842	0.033	No	1.03571	Rarely mutated in samples (<7%)
KIT	33	28	842	0.033	Yes	1.17857	Rarely mutated in samples (<7%)
GABRA5	28	28	842	0.033	No	1	Rarely mutated in samples (<7%)
VIRMA	34	28	842	0.033	No	1.21429	Rarely mutated in samples (<7%)
LLGL2	28	28	842	0.033	No	1	Rarely mutated in samples (<7%)
NLRP8	33	28	842	0.033	No	1.17857	Rarely mutated in samples (<7%)
RBM12	28	28	842	0.033	No	1	Rarely mutated in samples (<7%)
RAD50	35	28	842	0.033	Yes	1.25	Rarely mutated in samples (<7%)
ATP13A2	28	28	842	0.033	No	1	Rarely mutated in samples (<7%)
HPS3	29	28	842	0.033	No	1.03571	Rarely mutated in samples (<7%)
GPC6	29	28	842	0.033	No	1.03571	Rarely mutated in samples (<7%)
USH1C	31	28	842	0.033	No	1.10714	Rarely mutated in samples (<7%)
ATP11C	29	28	842	0.033	No	1.03571	Rarely mutated in samples (<7%)
MEGF10	29	28	842	0.033	No	1.03571	Rarely mutated in samples (<7%)
LCOR	30	28	842	0.033	No	1.07143	Rarely mutated in samples (<7%)
ABCA5	37	28	842	0.033	No	1.32143	Rarely mutated in samples (<7%)
ABCA10	37	28	842	0.033	No	1.32143	Rarely mutated in samples (<7%)
DAB1	30	28	842	0.033	No	1.07143	Rarely mutated in samples (<7%)
BEND2	32	28	842	0.033	No	1.14286	Rarely mutated in samples (<7%)
DNMT3B	36	32	980	0.033	Yes	1.125	Rarely mutated in samples (<7%)
USP32	33	28	842	0.033	No	1.17857	Rarely mutated in samples (<7%)
CHERP	30	28	842	0.033	No	1.07143	Rarely mutated in samples (<7%)
ANKRD50	30	28	842	0.033	No	1.07143	Rarely mutated in samples (<7%)
DRD5	29	28	842	0.033	No	1.03571	Rarely mutated in samples (<7%)
ZNF341	31	28	842	0.033	No	1.10714	Rarely mutated in samples (<7%)
EPHA2	30	28	842	0.033	No	1.07143	Rarely mutated in samples (<7%)
ARPP21	32	28	842	0.033	No	1.14286	Rarely mutated in samples (<7%)
IQGAP2	34	28	842	0.033	No	1.21429	Rarely mutated in samples (<7%)
FERMT3	28	28	842	0.033	No	1	Rarely mutated in samples (<7%)
PCDHGA10	29	28	842	0.033	No	1.03571	Rarely mutated in samples (<7%)
NRG3	35	28	842	0.033	No	1.25	Rarely mutated in samples (<7%)
AXDND1	33	28	842	0.033	No	1.17857	Rarely mutated in samples (<7%)
NT5C1B	30	28	842	0.033	No	1.07143	Rarely mutated in samples (<7%)
MTA1	30	28	842	0.033	No	1.07143	Rarely mutated in samples (<7%)
SLC6A5	29	28	842	0.033	No	1.03571	Rarely mutated in samples (<7%)
KCNH6	29	28	842	0.033	No	1.03571	Rarely mutated in samples (<7%)
ADNP2	30	28	842	0.033	No	1.07143	Rarely mutated in samples (<7%)
HACE1	30	28	842	0.033	No	1.07143	Rarely mutated in samples (<7%)
WDR35	30	28	842	0.033	No	1.07143	Rarely mutated in samples (<7%)
COBLL1	29	28	842	0.033	No	1.03571	Rarely mutated in samples (<7%)
SEMA6A	29	28	842	0.033	No	1.03571	Rarely mutated in samples (<7%)
ARHGAP20	37	28	842	0.033	No	1.32143	Rarely mutated in samples (<7%)
SCAF8	32	28	842	0.033	No	1.14286	Rarely mutated in samples (<7%)
PDE10A	33	28	842	0.033	No	1.17857	Rarely mutated in samples (<7%)
SLCO4C1	28	28	842	0.033	No	1	Rarely mutated in samples (<7%)
WASF3	29	28	842	0.033	No	1.03571	Rarely mutated in samples (<7%)
USP31	30	28	842	0.033	No	1.07143	Rarely mutated in samples (<7%)
KIAA1210	31	28	842	0.033	No	1.10714	Rarely mutated in samples (<7%)
STK31	33	28	842	0.033	No	1.17857	Rarely mutated in samples (<7%)
STIM2	32	28	842	0.033	No	1.14286	Rarely mutated in samples (<7%)
PLA2R1	33	28	842	0.033	No	1.17857	Rarely mutated in samples (<7%)
IRGC	28	28	842	0.033	No	1	Rarely mutated in samples (<7%)
TAF3	29	28	842	0.033	No	1.03571	Rarely mutated in samples (<7%)
CEP192	31	28	842	0.033	No	1.10714	Rarely mutated in samples (<7%)
NAA25	30	28	842	0.033	No	1.07143	Rarely mutated in samples (<7%)
SYMPK	33	28	842	0.033	No	1.17857	Rarely mutated in samples (<7%)
CSRNP3	29	28	842	0.033	No	1.03571	Rarely mutated in samples (<7%)
GAB3	28	28	842	0.033	No	1	Rarely mutated in samples (<7%)
VRTN	30	28	842	0.033	No	1.07143	Rarely mutated in samples (<7%)
UBA6	28	28	842	0.033	No	1	Rarely mutated in samples (<7%)
CCAR2	28	28	842	0.033	No	1	Rarely mutated in samples (<7%)
ZBTB46	29	28	842	0.033	No	1.03571	Rarely mutated in samples (<7%)
CDC42BPB	32	28	842	0.033	No	1.14286	Rarely mutated in samples (<7%)
RBM39	30	28	842	0.033	No	1.07143	Rarely mutated in samples (<7%)
ZNF493	30	28	842	0.033	No	1.07143	Rarely mutated in samples (<7%)
MBD6	32	28	842	0.033	Yes	1.14286	Rarely mutated in samples (<7%)
FZD7	29	28	842	0.033	No	1.03571	Rarely mutated in samples (<7%)
IPO13	29	28	842	0.033	No	1.03571	Rarely mutated in samples (<7%)
EIF5B	32	28	842	0.033	No	1.14286	Rarely mutated in samples (<7%)
TGIF1	29	28	842	0.033	No	1.03571	Rarely mutated in samples (<7%)
IGSF22	30	28	842	0.033	No	1.07143	Rarely mutated in samples (<7%)
SEMA3E	30	28	842	0.033	No	1.07143	Rarely mutated in samples (<7%)
ECE2	30	28	842	0.033	No	1.07143	Rarely mutated in samples (<7%)
DCAF1	30	28	842	0.033	No	1.07143	Rarely mutated in samples (<7%)
KIAA0408	34	28	842	0.033	No	1.21429	Rarely mutated in samples (<7%)
CILP	28	28	842	0.033	No	1	Rarely mutated in samples (<7%)
EMSY	31	28	842	0.033	Yes	1.10714	Rarely mutated in samples (<7%)
HELZ	31	28	842	0.033	No	1.10714	Rarely mutated in samples (<7%)
APBA2	30	28	842	0.033	No	1.07143	Rarely mutated in samples (<7%)
TP63	35	32	980	0.033	Yes	1.09375	Rarely mutated in samples (<7%)
IWS1	31	28	842	0.033	No	1.10714	Rarely mutated in samples (<7%)
SEMA3G	30	28	842	0.033	No	1.07143	Rarely mutated in samples (<7%)
ROCK1	33	28	842	0.033	No	1.17857	Rarely mutated in samples (<7%)
MCTP1	30	28	842	0.033	No	1.07143	Rarely mutated in samples (<7%)
PHLDB2	30	28	842	0.033	No	1.07143	Rarely mutated in samples (<7%)
MYOM1	34	28	842	0.033	No	1.21429	Rarely mutated in samples (<7%)
ZNF385D	29	28	842	0.033	No	1.03571	Rarely mutated in samples (<7%)
CACNA2D3	30	28	842	0.033	No	1.07143	Rarely mutated in samples (<7%)
RGS9	32	28	842	0.033	No	1.14286	Rarely mutated in samples (<7%)
WRN	32	28	842	0.033	Yes	1.14286	Rarely mutated in samples (<7%)
SLF2	30	28	842	0.033	No	1.07143	Rarely mutated in samples (<7%)
TRIM24	29	28	842	0.033	Yes	1.03571	Rarely mutated in samples (<7%)
ASXL3	36	28	842	0.033	No	1.28571	Rarely mutated in samples (<7%)
ATP7A	30	28	842	0.033	No	1.07143	Rarely mutated in samples (<7%)
ZAP70	29	28	842	0.033	No	1.03571	Rarely mutated in samples (<7%)
BCR	29	28	842	0.033	Yes	1.03571	Rarely mutated in samples (<7%)
MLH3	36	28	842	0.033	No	1.28571	Rarely mutated in samples (<7%)
CPED1	34	28	842	0.033	No	1.21429	Rarely mutated in samples (<7%)
SCN8A	30	28	842	0.033	No	1.07143	Rarely mutated in samples (<7%)
MYO5C	33	28	842	0.033	No	1.17857	Rarely mutated in samples (<7%)
MAP3K12	29	28	842	0.033	No	1.03571	Rarely mutated in samples (<7%)
SLC18A3	30	28	842	0.033	No	1.07143	Rarely mutated in samples (<7%)
PIK3C2A	28	28	842	0.033	No	1	Rarely mutated in samples (<7%)
BBS9	29	28	842	0.033	No	1.03571	Rarely mutated in samples (<7%)
PIK3R4	35	28	842	0.033	No	1.25	Rarely mutated in samples (<7%)
LTF	30	28	842	0.033	No	1.07143	Rarely mutated in samples (<7%)
LY75	30	28	842	0.033	No	1.07143	Rarely mutated in samples (<7%)
LRP10	29	28	842	0.033	No	1.03571	Rarely mutated in samples (<7%)
C2CD3	31	28	842	0.033	No	1.10714	Rarely mutated in samples (<7%)
RPS6KA6	29	28	842	0.033	No	1.03571	Rarely mutated in samples (<7%)
BAZ2B	30	28	842	0.033	No	1.07143	Rarely mutated in samples (<7%)
MAN2A2	30	28	842	0.033	No	1.07143	Rarely mutated in samples (<7%)
MED1	31	28	842	0.033	No	1.10714	Rarely mutated in samples (<7%)
MGAT3	30	28	842	0.033	No	1.07143	Rarely mutated in samples (<7%)
TMPRSS15	37	28	842	0.033	No	1.32143	Rarely mutated in samples (<7%)
ATP9B	33	28	842	0.033	No	1.17857	Rarely mutated in samples (<7%)
DACT1	31	28	842	0.033	No	1.10714	Rarely mutated in samples (<7%)
PTPRH	29	28	842	0.033	No	1.03571	Rarely mutated in samples (<7%)
PTPRN	31	28	842	0.033	No	1.10714	Rarely mutated in samples (<7%)
CPEB2	30	28	842	0.033	No	1.07143	Rarely mutated in samples (<7%)
SEZ6L2	30	28	842	0.033	No	1.07143	Rarely mutated in samples (<7%)
PLEKHH2	33	28	842	0.033	No	1.17857	Rarely mutated in samples (<7%)
PYGM	30	28	842	0.033	No	1.07143	Rarely mutated in samples (<7%)
KIF7	30	28	842	0.033	No	1.07143	Rarely mutated in samples (<7%)
ARID4A	29	28	842	0.033	Yes	1.03571	Rarely mutated in samples (<7%)
GTSE1	29	28	842	0.033	Yes	1.03571	Rarely mutated in samples (<7%)
MYO7A	34	28	842	0.033	No	1.21429	Rarely mutated in samples (<7%)
HNRNPM	30	28	842	0.033	No	1.07143	Rarely mutated in samples (<7%)
BTBD11	30	28	842	0.033	No	1.07143	Rarely mutated in samples (<7%)
UNC45B	35	28	842	0.033	No	1.25	Rarely mutated in samples (<7%)
CEP128	31	28	842	0.033	No	1.10714	Rarely mutated in samples (<7%)
ESRRG	30	28	842	0.033	No	1.07143	Rarely mutated in samples (<7%)
PRPF6	29	28	842	0.033	No	1.03571	Rarely mutated in samples (<7%)
NKTR	32	28	842	0.033	No	1.14286	Rarely mutated in samples (<7%)
FOXG1	30	28	842	0.033	No	1.07143	Rarely mutated in samples (<7%)
CDH17	27	27	842	0.032	No	1	Rarely mutated in samples (<7%)
ITGAX	31	27	842	0.032	No	1.14815	Rarely mutated in samples (<7%)
KIRREL2	28	27	842	0.032	No	1.03704	Rarely mutated in samples (<7%)
CPT1C	21	20	619	0.032	No	1.05	Rarely mutated in samples (<7%)
CHTF18	22	20	619	0.032	No	1.1	Rarely mutated in samples (<7%)
JAK2	33	27	842	0.032	Yes	1.22222	Rarely mutated in samples (<7%)
JAK3	29	27	842	0.032	Yes	1.07407	Rarely mutated in samples (<7%)
CLK2	20	20	619	0.032	No	1	Rarely mutated in samples (<7%)
FZD10	29	27	842	0.032	No	1.07407	Rarely mutated in samples (<7%)
ABL1	27	27	842	0.032	Yes	1	Rarely mutated in samples (<7%)
TBC1D9	30	27	842	0.032	No	1.11111	Rarely mutated in samples (<7%)
CAMTA2	31	27	842	0.032	No	1.14815	Rarely mutated in samples (<7%)
PRPF40B	29	27	842	0.032	No	1.07407	Rarely mutated in samples (<7%)
SPART	33	27	842	0.032	No	1.22222	Rarely mutated in samples (<7%)
GALNT2	30	27	842	0.032	No	1.11111	Rarely mutated in samples (<7%)
CNGB1	30	27	842	0.032	No	1.11111	Rarely mutated in samples (<7%)
NAALAD2	29	27	842	0.032	No	1.07407	Rarely mutated in samples (<7%)
PPIP5K2	27	27	842	0.032	No	1	Rarely mutated in samples (<7%)
ZC3H7B	27	27	842	0.032	No	1	Rarely mutated in samples (<7%)
PLCL2	28	27	842	0.032	No	1.03704	Rarely mutated in samples (<7%)
GARNL3	29	27	842	0.032	No	1.07407	Rarely mutated in samples (<7%)
LAMB3	29	27	842	0.032	No	1.07407	Rarely mutated in samples (<7%)
COPB1	29	27	842	0.032	No	1.07407	Rarely mutated in samples (<7%)
DCAF4L1	28	27	842	0.032	No	1.03704	Rarely mutated in samples (<7%)
SIK3	27	27	842	0.032	No	1	Rarely mutated in samples (<7%)
ZNF827	30	27	842	0.032	No	1.11111	Rarely mutated in samples (<7%)
UFL1	30	27	842	0.032	No	1.11111	Rarely mutated in samples (<7%)
HSPA12A	28	27	842	0.032	No	1.03704	Rarely mutated in samples (<7%)
CSF2RB	30	27	842	0.032	No	1.11111	Rarely mutated in samples (<7%)
[truncated: 16,217 more rows]

## Sheet: Table S2
Table S2. All associations between expression levels and mutational status (p<0.05)
Gene (expression levels)	Gene (mutational status)	p-value	FC (log10)
MUC5B	DNAH7	0.0002	1.494
MUC5B	FLNB	0.0002	1.51
SYNE2	ASPM	0.0003	0.59
MUC5B	KIAA1109	0.0003	1.013
MUC5B	TENM2	0.0003	1.271
MUC5B	ASPM	0.0004	1.263
CUX1	TMEM132D	0.0005	-0.406
MUC5B	MYO15A	0.0005	1.442
ITPR3	ADGRB3	0.0006	0.4
DOCK3	MYO15A	0.0006	0.979
MUC5B	WDFY3	0.0007	1.077
DOCK3	FLNB	0.0008	0.917
UBR5	FLNB	0.0012	-0.538
MUC5B	ADGRV1	0.0013	1.003
MUC5B	ACVR2A	0.0016	1.286
ACVR2A	ACVR2A	0.0022	0.517
MUC5B	ATP10A	0.0024	1.015
ITPR3	FLNB	0.0026	0.382
MUC5B	LAMA2	0.0027	1.102
DOCK3	SZT2	0.0027	1.143
MUC5B	COL7A1	0.0028	1.49
DOCK3	XIRP2	0.0028	0.58
ACVR2A	BMPR2	0.0028	0.567
RP1L1	TRIOBP	0.0036	-0.302
DOCK3	TRPM3	0.0039	0.515
DOCK3	BMPR2	0.0039	0.903
MUC5B	BMPR2	0.004	1.559
MYH11	MYH11	0.0043	-0.44
SYNE2	LAMA2	0.0056	0.429
UBR5	COL7A1	0.006	-0.456
SYNE2	FLNB	0.0063	0.389
DOCK3	POLE	0.0066	0.726
ACVR2A	SIPA1L3	0.0072	0.5
MUC5B	RP1L1	0.0074	1.426
SYNE2	HSPG2	0.0074	0.611
DOCK3	DNAH1	0.0074	0.608
ZNF536	FLNB	0.0075	-0.484
FLNA	ACVR2A	0.0075	0.463
FBN2	FBN3	0.0079	-0.4
DOCK3	ADGRV1	0.0081	0.541
MUC5B	XIRP2	0.0084	1.107
DOCK3	CELSR1	0.0085	0.846
DNAH7	PCNT	0.009	0.423
SYNE2	TRIOBP	0.009	0.402
DOCK3	TCHH	0.0095	0.608
SYNE2	SRRM2	0.0099	0.434
DOCK3	MYH11	0.0104	0.607
DOCK3	TMEM132D	0.0104	0.568
MUC5B	HSPG2	0.0105	1.629
MUC5B	SZT2	0.0109	1.93
FLNA	BMPR2	0.0112	0.57
MUC5B	PCNT	0.0114	1.376
DNAH8	BMPR2	0.0116	-0.411
MUC5B	ITPR3	0.0125	1.443
SYNE2	CUX1	0.0129	0.689
FBN2	SIPA1L3	0.0133	-0.594
ITPR3	CUX1	0.0137	0.653
FBN2	CELSR2	0.0139	-0.313
ITPR3	ZNF462	0.0142	0.35
TENM2	CELSR2	0.0146	-0.381
SYNE2	BMPR2	0.0151	0.417
DNAH8	GLI3	0.0156	-0.386
DNAH7	MYO15A	0.016	0.567
SYNE2	DNAH17	0.0161	1.701
WDFY3	DNAH1	0.0164	0.327
SYNE2	ITPR3	0.0165	0.447
MUC5B	SRRM2	0.0165	1.49
MUC5B	DNAH1	0.0166	1.195
SYNE2	UBR5	0.0166	0.67
FBN2	BMPR2	0.0175	-0.786
DOCK3	NOTCH3	0.0194	0.522
FN1	FN1	0.0195	0.651
FLNA	FN1	0.0211	0.539
DST	TRPM3	0.0219	-0.371
FN1	ACVR2A	0.022	0.464
MUC5B	CELSR1	0.0222	1.595
SRRM2	SIPA1L3	0.0222	0.377
MUC5B	ZNF536	0.0223	0.78
PCNT	ZNF462	0.0226	0.484
DNAH8	ASPM	0.0228	-0.371
SPEN	ZNF462	0.0232	0.353
ASPM	ITPR3	0.0233	0.388
UBR5	ACVR2A	0.0242	-0.445
SYNE2	ZNF462	0.0243	1.071
SPEN	TRIOBP	0.0255	0.394
ATP10A	DNAH17	0.0257	-0.789
MUC5B	SIPA1L3	0.0259	1.072
MYH11	CELSR1	0.0267	-0.42
UBR5	CELSR1	0.0275	-0.519
ITPR3	BMPR2	0.0288	0.328
GLI3	PTPRS	0.0292	0.808
MUC5B	FN1	0.0293	0.829
COL7A1	NOTCH3	0.03	0.331
ATP10A	SZT2	0.0302	-0.599
UBR5	POLE	0.0307	-0.46
DOCK3	PAPPA2	0.0323	0.546
HUWE1	CELSR1	0.0329	-0.329
DNAH8	ZNF462	0.0331	-0.361
MUC5B	MUC5B	0.0336	1.424
GLI3	DNAH1	0.0346	0.649
FBN2	TMEM132D	0.0362	-0.33
SYNE2	PTPRS	0.0365	0.577
ASPM	CUX1	0.0373	0.44
MUC5B	SPEN	0.0378	1.317
GLI3	XIRP2	0.0388	0.647
MYH11	PCNT	0.0392	-0.764
MYH11	SPEN	0.0399	-0.421
SYNE2	SPEN	0.0416	0.389
FBN2	ITPR3	0.0419	-0.454
FLNA	DNAH1	0.0421	0.549
ASPM	DNAH7	0.0427	0.392
ASPM	UBR5	0.0429	0.354
SLITRK5	ACVR2A	0.0435	-0.686
MUC5B	PTPRS	0.0446	0.74
GLI3	FN1	0.0453	0.786
DLC1	BMPR2	0.0458	0.349
DNAH11	UBR5	0.0464	0.685
ACVR2A	CELSR1	0.0465	0.48
DOCK3	COL7A1	0.0472	0.474
HUWE1	SPEG	0.0474	-0.423
DNAH8	SIPA1L3	0.0498	-0.315
ADGRV1	SIPA1L3	0.0498	0.601

## Sheet: Table S3
Table S3. All associations between copy number variations and mutational status (p<0.05)
Gene (copy number variations	Gene (mutational status)	p-value	Ratio of altered copies (Mutated vs WT)
NOTCH3	SLITRK5	0.00131081	5.02016
NOTCH3	PCNT	0.0212088	5.02016
FBN3	SLITRK5	0.00532768	4.09539
FBN3	PCNT	0.0486228	4.09539
TMEM132D	CUX1	0.00119469	3.95294
NOTCH3	ASPM	0.0112115	3.89425
SIPA1L3	SLITRK5	0.00144563	3.89062
POLE	CUX1	0.00198707	3.73333
PTPRS	SLITRK5	0.0102807	3.61919
ZNF462	FLNA	0.0386273	3.52778
TRPM3	FLNA	0.0417746	3.45578
TMEM132D	CELSR2	0.00374792	3.1125
POLE	CELSR2	0.00621523	2.93632
TMEM132D	HSPG2	0.0185215	2.80112
TMEM132D	GLI3	0.00572734	2.7384
POLE	HSPG2	0.0270488	2.6455
POLE	GLI3	0.00973071	2.58042
TMEM132D	ZNF536	0.0128837	2.35278
TMEM132D	NOTCH3	0.023878	2.29827
POLE	ZNF536	0.0217964	2.21438
POLE	NOTCH3	0.0374271	2.16568
CUX1	SLITRK5	0.0328711	2.075
TMEM132D	PCDH15	0.0368376	2.05882
POLE	TMEM132D	0.0348062	2.00421
