# Supplementary material for: Impact of mini-driver genes in the prognosis and tumor features of colorectal cancer samples: a novel perspective to support current biomarkers
Source: PeerJ. 2023 May 16;11:e15410. doi: 10.7717/peerj.15410 (PMC10198153; doi:10.7717/peerj.15410)
Supplement: Supplemental Information 3 — Each line and column represent mutational information for patients and genes, respectively. [file peerj-11-15410-s003.xlsx]

## Sheet: Mutation Analysis
STUDY_ID	SAMPLE_ID	DNAH8	ZC3H13	MUC5B	ATP10A	SRCAP	DNAH11	PCDH15	VPS13B	SYNE2	NALCN	DNAH17	FREM2	CHD6	ABCA13	CUBN	ZNF536	FAT1	LAMA5	BSN	FBN2	ASPM	LAMA1	KIAA1109	TECTA	RELN	COL12A1	DOCK2	DNAH3	KALRN	ABCA12	FLNC	LAMA2	GLI3	SRRM2	TENM3	DSCAM	TENM2	DCHS2	SLITRK5	HSPG2	FLNA	FN1	RP1L1	TRPS1	PCDH9	PDZD2	WDFY3	DST
coadread_dfci_2016	coadread_dfci_2016_335135	WT	K1006Nfs*31	WT	A922V	WT	WT	P1439S I55N T65I	WT	K1189Sfs*4	WT	G4119D R1782* L2806F S1764Y	R2805C T2777A	R915C	WT	G388V	WT	WT	A505T A3205T	R1015H	S2274P V2088A	R980*	WT	R4743H Q2935R	WT	WT	WT	WT	K2930N	WT	WT	A375T	WT	WT	R1786*	R2235C	WT	WT	H1108R	WT	R1186W R222W	G2398D L1102M A110V T1046A	V168A A454T	E2128D	WT	WT	R2247W A2610S	WT	D373N
coadread_dfci_2016	coadread_dfci_2016_593	K970N R4063* R4028I	S1279Y K258N	WT	R1469C E81K	E105K	R3371Q E975* S3739Y R3848*	E1929K E1729K K808N D224Y	S2773L R2759W S1263Y	E2231K E1801D	Q757E	F1058L	R2278C S1119Y L1787I	WT	A2574S	L3129I	E969D	WT	WT	E3572K R3750W	WT	R2700Q Q1663H Q2696* R2294I	R2360C R2592W A1638V	R3005K R2614W	A967V	F1884L D493G F3062C	G1832* D502N D1829G E528D	E632D	I767V L1152I I2496L D3572Y D2012Y	WT	K240N X865_splice	WT	WT	WT	R574C	R1154* L1977I	WT	D642N R984*	WT	N491T	E1460D	A1160T	R2043H	A2303T E2184G	T748A	E84D	F2229Y	R3504C	R765Q K1905N D4156Y E103A
coadread_dfci_2016	coadread_dfci_2016_2269	E1443K R2232C S1672F S686L V2256A N76H X1516_splice	WT	WT	E175K	WT	R3294Q E510* E935D	D535N Y684C	A3025V	R3563Q E1582* G3436D E452A	R93W M1425L	D2874G T2171A	Y2528*	K717N N1011H	E117D E319G F4155L I1127L	E638K F3479L	WT	D4331G	R2800C A1423T	E2355K R3428Q	D2695G F2689L	R2842Q N1216K	F2353C	R386Q	R770W I2054=	X2175_splice	E283* E780D R1434Q R178I N1337H	R36Q	Y298C R772Q	R65C P1652S	S846L R1514C D1408Y D2252G S922P	R1657Q	M2481I	N1221S	WT	H1035N	WT	R1275* R1413C	WT	WT	WT	WT	WT	G2369C A1783V G614D	R853Q R965H	G724D	T2286A	WT	A2776T R87W E4468*
coadread_dfci_2016	coadread_dfci_2016_578	L3488V P2967H E3600D V944G	T1238A	R4964Q	WT	Q535H	D1663N	WT	E222*	S3338Y R469Q F4991L	WT	WT	E250K	G510S	K1246N	V1717I	R294H G337S	G609V R4481Q	WT	WT	F2739C	K3228Q	N496K R484C	E1201*	R810*	R1576* D2848N A3385V	D910Y E1461* D819Y	R572Q F968L	E981K E1005D E631*	WT	R1515Q D2340Y N1583H D1412N	E2472D D409N	WT	D1514N	WT	S1683Y L540M	P545T	R2223C	WT	E931K	R534C	WT	M2141I V1564A	D2371Y	R143I	S1221Y Q231H R483Q L360I E263D N481S	P1265H	R3404*	E724* D234N S2331N
coadread_dfci_2016	coadread_dfci_2016_3021	Q1316R	K1006Nfs*31	P2830T	T1243S	V1223M	R1320C	X436_splice	WT	N5926Ifs*26 K344Sfs*9 A5944V	WT	T3469I	P45L	WT	WT	WT	A710V S1201R	WT	R126L	WT	V2653=	H1089N	WT	WT	WT	G2153S	WT	X1127_splice	WT	WT	N1380Mfs*12	R69W	WT	R1051W	WT	T695Rfs*81	WT	N825S	WT	WT	G4335=	WT	Y1298H	A179V	WT	WT	WT	V154A	L4005F
coadread_dfci_2016	coadread_dfci_2016_3724	WT	WT	G778D T4614M	WT	K2749R	R685H L3824P	G1567D	S1694Ffs*24	N5926Kfs*2 W5898C I18T	WT	A4039V T4183M R3785C	R406C P240L	WT	WT	F3017L	WT	G3597Afs*3 A3109T	WT	T2506Hfs*63	WT	WT	WT	S142P K4676Nfs*8	WT	S34P	WT	R1696W T1799A	WT	WT	A162T	WT	WT	WT	T1939M	WT	WT	WT	R414K	WT	V4332A	WT	WT	WT	P21Lfs*2	WT	WT	L1842Yfs*10 H1195Q	S2307G
coadread_dfci_2016	coadread_dfci_2016_207430	WT	E1019G	T1309M P1610L A1551T	R135L	WT	WT	X436_splice	S3988Pfs*25 K3800E	A6465V	WT	G3501C	WT	WT	WT	WT	WT	WT	WT	W1632G	D2842G	WT	X1555_splice V1827L F2308S	H3354R	WT	WT	WT	WT	A3118T	I1511V	G1136C	E2053D	K2114R	WT	WT	WT	I353V	N2492S	T553A	WT	R2830H	WT	WT	WT	R1125W	WT	WT	WT	V471Gfs*16
coadread_dfci_2016	coadread_dfci_2016_116	K1999T K604N K399Q L2934V E229* R1922I	WT	WT	WT	S1747Y	E1071* F3738L P1631H E975* D4194Y A1010T	R1323I S480L E1929D	R781I L2180I	E2010* D1385N	S902F	WT	V1077G F2857C I1402V	K2E	N1961H A3718T E4847K K3950N N4986H A450S Q4732H I2561V	L2367I	K389N	R4479I I1287L	WT	WT	L2812I	M457I K1214N	G2712S	WT	F1845C	F124C	E623* V1065A	R1370* Q1120K	E1226* D1316A	V644A E454K	K240N L165F	D1691N	K2124N	E561D	WT	R2190W S355Y V1688A	L1121I A515S	S1326L	F737L F1835S N2725T	E418D	WT	S1854R	G1215D	G1648S E2226* D1757Y	WT	E25* N209H E95K E213D	A1278V L2393M S2341Y L664V	WT	D4575N E1016* K1348N K3685R L2501M Q4257H
coadread_dfci_2016	coadread_dfci_2016_1241	P506Lfs*9 Q4332R T3345M	WT	R4175H	V1299G	WT	X3904_splice	WT	R3586W R1030C	R81Q	WT	WT	WT	R244H	W525* V1917Afs*6	WT	V268A	N126Ifs*20	WT	WT	R2286Gfs*25	R766C W2797R R3398C L2285Qfs*32	WT	R147H A4666V A933T	WT	WT	G854Vfs*8	Q345Afs*12	WT	A44T	WT	WT	N2169del	WT	WT	C146Y	WT	WT	X2043_splice	P798Q	R3952C G320A	WT	X708_splice T2156M X1538_splice	K149E	N1289Mfs*16	WT	K104Qfs*38	WT	WT
coadread_dfci_2016	coadread_dfci_2016_3701	WT	S486R	WT	WT	WT	I4278M	WT	M3265Cfs*3 E3883A G3029*	P2755T A6603T	T1281M	WT	WT	WT	WT	WT	A999T	WT	WT	WT	WT	WT	WT	X680_splice	A495T	Q1237R I3291V W1388L	WT	WT	S2783L	WT	WT	G802S	WT	WT	WT	WT	WT	WT	WT	WT	WT	S2531*	T245S	WT	WT	WT	WT	WT	WT
coadread_dfci_2016	coadread_dfci_2016_3640	P506Lfs*9	R933C	WT	WT	WT	Y2627C	N1592S	WT	WT	WT	WT	WT	WT	WT	WT	P1261L	Q1583*	WT	WT	WT	WT	WT	T991A L3191P	WT	WT	WT	WT	WT	WT	WT	WT	WT	R956H	WT	WT	A811V	WT	WT	Y364C	WT	A601V	WT	WT	WT	WT	P2518S	WT	X4555_splice
coadread_dfci_2016	coadread_dfci_2016_2448	A3306V Y4051H	WT	WT	WT	R1332Gfs*11 L837Yfs*46 R866H	WT	X436_splice	I3362V	E2033K	K452E	K3189T	WT	WT	A122T L3711= Y87H	WT	G808R	N126Ifs*20	WT	T1309Pfs*62 H3551R P1841S F3922Ifs*67	WT	WT	M369V	WT	E1468K R2021H	WT	WT	WT	H1346=	R4C	V1346Lfs*21	V368M	WT	WT	R1809Q	WT	WT	R992H	WT	L581F	WT	V222I A1201V	R2476* Q2209Dfs*13 S2366N	V1100M	S623L	WT	WT	WT	WT
coadread_dfci_2016	coadread_dfci_2016_1222	WT	G997Dfs*40	A1746V P2631Q	WT	WT	A3538S	WT	S822G	WT	R761C T204A E432D H844Q	WT	WT	WT	M3741I	WT	WT	WT	A3414T	WT	R509H P1623Lfs*26	WT	WT	WT	WT	WT	WT	WT	P2853Hfs*2	WT	WT	R558H	WT	P886L	P1004Q	I1849V	T1957M	V2038I	WT	WT	D1068N	WT	WT	P284Rfs*26 E2033* R1611Q	WT	WT	WT	WT	Q4339R
coadread_dfci_2016	coadread_dfci_2016_197	Y3889H	WT	WT	D720G	P984Hfs*9	K2078T G3570Efs*50	N1526K X436_splice	WT	M561I	WT	G2499C P2631H	S602T	WT	WT	WT	WT	WT	WT	N1154S	WT	WT	G2815D	R1452G	WT	V1203M V1682I	WT	WT	N1989S L2655I	WT	E668G	WT	WT	WT	R628*	WT	E1093Pfs*7	WT	WT	G722del	K3972Rfs*58	P97H	WT	E1699D	WT	WT	WT	WT	WT
coadread_dfci_2016	coadread_dfci_2016_267922	WT	G997Dfs*40	WT	WT	WT	WT	R245* V1888I	WT	WT	WT	A3172V	WT	A2690V	WT	WT	WT	F1765Lfs*21	WT	WT	V2390L	WT	WT	WT	WT	WT	WT	E1553D	WT	WT	A2016S G1691D	R482Q I2003N	P439S	WT	R1498H	WT	R1745C	WT	WT	P799L	A1586T	R196Q	WT	WT	N1289Mfs*16	WT	R2235Q	WT	WT
coadread_dfci_2016	coadread_dfci_2016_1212	N1616D P4394Lfs*68	WT	I4979T	WT	WT	V1381I	G1194*	WT	E3276K	WT	R3409C I746V I1926V	WT	WT	WT	G818R	R294H P817Qfs*22	WT	WT	WT	WT	WT	WT	N2900S	WT	WT	G854Vfs*8 R1286C	WT	WT	R377C	F655Sfs*9 A2272T	P1559H	WT	WT	WT	A2503V	WT	WT	T1102M	WT	V3033A A3810T	A1188V	WT	WT	WT	WT	WT	WT	V4276Wfs*6 A4994V
coadread_dfci_2016	coadread_dfci_2016_306558	WT	G997Rfs*8	T4761M	T1254A A357T	WT	WT	WT	WT	P6509H F6007Lfs*8	WT	P3210L	WT	WT	A3141T	WT	S997I	WT	A3006S	WT	Y2521Mfs*90	WT	WT	WT	V712M	S34L	X2316_splice	WT	P761L	A1181V	WT	WT	WT	R904C	S839Y	WT	WT	R2331C V2214M E2729K	WT	Q797P A650Rfs*62	WT	V2337I	R953K G1602R	A1499Lfs*25	WT	WT	WT	S807Y	A3866=
coadread_dfci_2016	coadread_dfci_2016_102	F1584L	WT	L1988M	WT	WT	WT	WT	WT	R3938C X79_splice	WT	WT	D1690N R2434Q	WT	WT	WT	WT	L2452M	WT	WT	WT	WT	G3072W	WT	WT	WT	WT	WT	WT	L142Sfs*5	WT	G1647D	WT	WT	WT	WT	WT	WT	N2308D	L275S	WT	V222I V752I	WT	WT	WT	WT	A1053V	WT	WT
coadread_dfci_2016	coadread_dfci_2016_3729	WT	WT	WT	R689H	WT	Y1602H	WT	X2502_splice	R3260H	K1230N	WT	L89M	WT	WT	G1376D	WT	WT	A2492T T1634M	R3492W	G589S	G938D	A2022V	WT	WT	WT	WT	WT	WT	WT	WT	WT	W1098R	WT	WT	G60S D1884N	WT	R2247H A1538V	WT	WT	WT	WT	WT	R1567H	R297C	WT	R670C R1261L	WT	WT
coadread_dfci_2016	coadread_dfci_2016_3646	S843Lfs*44	WT	S623A	WT	WT	WT	P1828H	WT	R1256H	WT	WT	A106T R406H	F474Lfs*17	WT	WT	S928G	WT	WT	R2848W	WT	WT	WT	WT	L199*	WT	I210Ffs*9	WT	L3919P	WT	D1809N	WT	C1436Y	WT	WT	A2361V	WT	H550Y	WT	V218M	WT	T1143A P769H V689I	WT	WT	WT	WT	WT	WT	W933*
coadread_dfci_2016	coadread_dfci_2016_3235	I3559M	R1304* K958N	WT	WT	R898I	L1986I R3004W I4149V	A412T E830* F1515C	S2773L	E3028* E5748*	R1008*	L737I	X2309_splice S1037P	WT	E117*	E530K R2636* X1003_splice Q3391H N1482H	A326T E313D	L118F A608T	WT	WT	R999C	E360D E2785* H2408P	WT	WT	WT	Y1299H P3460S	K2532N R2402I K914N	K525N V886I	Y2366H	E613K	P587S N1334T R1866I	WT	R2319*	WT	WT	R898H	Q395*	L1158I	WT	WT	WT	R884H	M1856I	WT	WT	V832I	S1592L	WT	X363_splice
coadread_dfci_2016	coadread_dfci_2016_233366	WT	WT	WT	WT	WT	WT	WT	R2968*	WT	WT	WT	D1331E	WT	R3497* L4132M	WT	T325M	WT	WT	R2250Gfs*54 V701M	R1742*	R771H	R2744C	WT	WT	WT	WT	R928Q	WT	WT	WT	WT	WT	WT	R479H	WT	WT	WT	WT	WT	WT	WT	C2324R	WT	N1289Kfs*16	A279V G485V	WT	WT	L1173Ffs*11
coadread_dfci_2016	coadread_dfci_2016_2624	WT	WT	P1325L	K791Rfs*28 A455=	WT	WT	S1125G	A1498T S38N	WT	WT	E1676K N4125Qfs*13 H1059R	WT	WT	WT	WT	WT	V3656I	WT	WT	E984G	R977C R1531H	G1437V	WT	A1471V	WT	WT	WT	WT	WT	WT	WT	E1888*	WT	WT	WT	P77T	WT	WT	V8I R642G	A2331Pfs*3	WT	D1202E	R419Sfs*73 T198M P275Q	R853*	WT	WT	WT	WT
coadread_dfci_2016	coadread_dfci_2016_3080	N2439I	WT	T3840M	WT	E2076* A2385V	H1850R	WT	A3555T	WT	WT	WT	WT	WT	D448Y	WT	R546H	WT	V3068M	WT	G2335D	P223H	Q713*	WT	WT	WT	T219A	WT	WT	A574T	WT	WT	R1408H Q854K G376Vfs*13	WT	WT	WT	WT	WT	WT	WT	WT	WT	T507A	Q165H	A620T	WT	WT	WT	WT
coadread_dfci_2016	coadread_dfci_2016_345	WT	E761Afs*21	A110T	WT	WT	WT	WT	X2502_splice	N1600Ifs*6	WT	WT	WT	WT	WT	WT	WT	WT	WT	G1792Efs*17	WT	WT	L1108R	X2933_splice	N864Tfs*30	R913C	WT	WT	WT	L1062=	S1152L	WT	WT	P1201L	WT	WT	T1728M	WT	WT	WT	WT	R196W	G1854R	P805H	WT	WT	WT	R3496H	L3439M
coadread_dfci_2016	coadread_dfci_2016_293	V4053A	WT	WT	X1030_splice	R1065W	WT	WT	X2502_splice	WT	WT	WT	WT	WT	WT	G1406R	WT	WT	WT	WT	T987R	WT	WT	T236A	F333Lfs*46	WT	G854Vfs*8	WT	W509C	WT	R714* E942Gfs*2	G1252D	P3120S	WT	R832T	WT	WT	WT	R647*	P920Rfs*6 A648P	R1817*	E2137K	WT	P1917S S626Y	WT	WT	WT	WT	WT
coadread_dfci_2016	coadread_dfci_2016_3319	WT	S1190G	G1163Afs*14	G475V	WT	WT	V1397F	WT	K2317E H6395Y	WT	R4106W	WT	WT	WT	WT	WT	WT	R1996C L2223Wfs*28	WT	G2583E A241T T271I	V1321I	N496K	WT	A1879V	WT	WT	WT	D3083G	WT	WT	WT	X2692_splice	WT	R245Q S2067P	WT	WT	R2118C V2305I	R616H	V524I	WT	P1035S	WT	WT	WT	WT	WT	WT	WT
coadread_tcga	TCGA-AA-3672-01	R2232H	WT	A3496T	S601A	WT	S1548I D2757Y	N1906Kfs*26	Y3548C	WT	WT	WT	A634T	Y319C V572I	L183R	W2744C	E312A	WT	WT	WT	WT	WT	WT	A535T	T815M	G1467C	WT	WT	WT	WT	WT	P1141L	WT	A57T	A2225T	N1913S	WT	WT	WT	WT	P3112Lfs*13	WT	WT	WT	WT	WT	WT	WT	R2870H Q97*
coadread_dfci_2016	coadread_dfci_2016_3024	WT	WT	A1408T	WT	WT	WT	WT	WT	N2215Ifs*12 X1526_splice	WT	T1477M	G3072*	WT	WT	V3446A	WT	K1225Nfs*9	WT	WT	WT	WT	P46L	WT	WT	WT	Y1762H T826M	WT	A2938V V3474A	V656I S1622I	S467R	WT	E1764G	WT	WT	WT	WT	WT	WT	WT	WT	A510T	L255Q	WT	T862N	WT	WT	WT	WT
coadread_dfci_2016	coadread_dfci_2016_3181	WT	WT	WT	WT	H2060N	WT	X698_splice	WT	WT	R1671C	WT	WT	WT	WT	R513C	M515I	F1301Sfs*67	X2683_splice	WT	WT	S149G	G1031V	WT	A1289T	WT	WT	WT	S3515Ffs*26	V630M	WT	WT	WT	WT	G28D	WT	R1018H K1350N	WT	WT	WT	R187*	WT	WT	G301V	WT	WT	WT	L1842Yfs*10	R4474W Q3893P
coadread_dfci_2016	coadread_dfci_2016_1791	WT	WT	WT	W1226Cfs*46	WT	WT	WT	L58*	WT	L1019Wfs*7	WT	WT	WT	WT	WT	WT	N4020D	WT	WT	WT	WT	WT	D2940N A4835T	WT	A1006D	WT	V448I D555Gfs*113	WT	WT	D895N	V809M	C1436W	W1162*	R462H	D2642G T695Rfs*81	Y1024C T1572A G381D	G1589Efs*18	WT	WT	WT	V1566M	G1344D	WT	P1255S	WT	WT	G504C	WT
coadread_dfci_2016	coadread_dfci_2016_68	R3032C K627N	WT	D909N D5595N	V1244M	WT	WT	WT	WT	Q6685*	R295H	L1240Ffs*64	WT	R529Q H2698Nfs*25 K1371del	WT	T2007M V322I L1128I	WT	WT	WT	T1542M	WT	R242C X1248_splice	WT	D348N	WT	V2534Efs*25	WT	WT	WT	WT	WT	WT	WT	WT	V66I	WT	WT	WT	WT	WT	WT	WT	G688S	WT	WT	WT	K1843Rfs*31	R3388W	K4382N
coadread_dfci_2016	coadread_dfci_2016_1202	T4440M	WT	WT	R968H	R1007Q	WT	WT	T1716A	K677Nfs*30 K344Sfs*9	F1212Lfs*26	WT	A2761T	WT	WT	WT	WT	V1033M	WT	WT	R1863W	A2193T	WT	N402Ifs*9 X3224_splice	WT	A2547V	WT	WT	G2193Rfs*6	WT	WT	WT	WT	WT	R44H R1827Q R2119H	A1177V	WT	WT	WT	A452T	WT	R1993W T413M	WT	WT	A932V	WT	WT	WT	L1173Wfs*8 X732_splice
coadread_dfci_2016	coadread_dfci_2016_242594	WT	WT	WT	WT	R3077* X2243_splice	WT	WT	WT	D6376G	WT	WT	R1391Q	WT	WT	WT	R365H	WT	G240D	WT	WT	WT	E1992* H2774R L1537I	WT	WT	WT	WT	Y1220H	G3444C	WT	WT	WT	N2168S	WT	WT	WT	X1571_splice	WT	WT	WT	WT	E2018Sfs*6	WT	R958C	E1070D	WT	D2349G	R1183*	WT
coadread_dfci_2016	coadread_dfci_2016_3262	R526H	WT	A4797T T2827M	WT	R114Q	WT	L465S	G2114*	F4992Lfs*13	R708H	T3990Hfs*92	WT	E66D	WT	WT	WT	WT	WT	R1023H	WT	WT	P997S	WT	WT	WT	G854Vfs*8	WT	WT	WT	A943Rfs*40	WT	Q95*	V1096M	WT	WT	R1461H	Y2091C	WT	WT	G2963Afs*142	WT	WT	R950H	WT	WT	WT	WT	R404I
coadread_dfci_2016	coadread_dfci_2016_3064	WT	WT	WT	WT	P1488H	M2272V	WT	Q2639H	R6381L V4124M	WT	WT	D2368H	M2632V	WT	WT	T153M	WT	R1181H	WT	WT	WT	G1504S	N2329S	WT	WT	G854Vfs*8	WT	WT	WT	WT	C1348Y K259E Q1478R C1348W Y537H	N1916Tfs*48 Y2804Tfs*15	P1374S M1397I	WT	E718K	WT	R883Q	WT	WT	K4136= S3931Rfs*99	P1759T	V1031M	A429T	WT	WT	T80R	WT	M3389V E2810D
coadread_dfci_2016	coadread_dfci_2016_3690	WT	WT	WT	WT	R758C	R3763C	WT	WT	WT	WT	R1506C	WT	WT	E4038K	C136Y	X1_splice	WT	WT	WT	WT	Y2200H	WT	WT	A967V	WT	WT	WT	WT	A685V	WT	V215M	S633N	WT	R509*	R17*	R307H	R1878C	V629I	WT	WT	D2634Tfs*71	X1418_splice X708_splice	WT	P1292S	WT	WT	WT	WT
coadread_dfci_2016	coadread_dfci_2016_60	R3651*	WT	WT	R296C	L1463S	R4143C	WT	WT	M230T	WT	P914L	WT	WT	WT	V322I	I772M	WT	R3036H P3018L	R1408C A3573=	WT	R117Q	WT	WT	WT	WT	WT	WT	WT	WT	WT	P1414S	WT	A1274T	WT	WT	K1877Nfs*8	WT	G354R	G151D	G2177R	G1213S A2031V	WT	WT	WT	WT	WT	WT	WT
coadread_dfci_2016	coadread_dfci_2016_1748	X59_splice	WT	K3695E P3910L K4494I P2455Rfs*20	G245S	L837Yfs*46	WT	WT	WT	WT	WT	WT	WT	WT	WT	WT	WT	WT	A212T	WT	V74I	A1052V	WT	V3052Cfs*13	R767W G1475R	WT	WT	WT	A2890V	WT	P141H	WT	WT	N1294D	WT	WT	WT	WT	WT	A906Qfs*20 *959fs	S152L T533I	WT	WT	WT	WT	I27F F188Lfs*17	R812Q	WT	H1388Y
coadread_dfci_2016	coadread_dfci_2016_3321	G2339S	WT	E814K	R879H	WT	WT	WT	WT	WT	WT	WT	T607M	R810C D1833G	WT	WT	WT	V306A	WT	WT	WT	A1308T	WT	K4878N	WT	WT	X2316_splice	K850Sfs*16 X1127_splice	L3443M	WT	WT	V195M	WT	WT	K1766T	A1174V	V1615A	G1589Efs*18 A1164S	H562Y	Y717H	A338D G552= P1454H V1867Wfs*94	WT	WT	WT	S1259R Q718R	WT	T1187A	WT	WT
coadread_dfci_2016	coadread_dfci_2016_3263	R2740H	WT	WT	WT	WT	WT	WT	R3684W P2671S	R5877Q	WT	R3218C	WT	R440W	WT	WT	WT	S24N I2399V	WT	WT	WT	WT	WT	WT	WT	R3H G2153D	WT	R1071C E1306K	WT	T1558Sfs*8	WT	R1803W	T53M K1775Nfs*16	G1196S	WT	WT	WT	WT	WT	E750G	WT	V606M	V711M T2005A	WT	WT	*1238Yext*26	G720V R829H	L748Ffs*20	WT
coadread_dfci_2016	coadread_dfci_2016_1849	WT	WT	S3537C S3462Afs*29	L1385M	A1809T	X1085_splice	WT	WT	H5515Y X1947_splice X1526_splice	Q414*	A3592V A33T	T607M Q1190H	WT	WT	X2334_splice	Q1242H	WT	WT	WT	P2085Lfs*164	R1729Q A1804Qfs*17	E1915*	WT	WT	WT	WT	WT	G3800D	WT	WT	A1767T	WT	WT	WT	R1494Q R460W	R1335Q X312_splice G50D D1086G	V635M	WT	R734H R929W H730Y	X3924_splice	WT	WT	WT	WT	Q1096R	K1843Rfs*31 P225H	WT	R5092*
coadread_dfci_2016	coadread_dfci_2016_3503	WT	WT	S1496L V5197I	WT	R438Q	A442T	WT	WT	WT	R43C	WT	WT	WT	WT	C289S A1202T V1368L	WT	WT	WT	WT	G2769S	WT	WT	V640I	WT	WT	WT	WT	WT	WT	R929H	R1982C	WT	WT	WT	WT	P1726L R1335W	N2648D	S2874Lfs*7	WT	A2533V	WT	V2281M	WT	WT	Y715F	WT	WT	WT
coadread_dfci_2016	coadread_dfci_2016_230737	WT	WT	WT	R1019W	WT	WT	WT	WT	R5714H A4771V X1526_splice T5581M	E843* W32*	Q3898*	V2743M	WT	WT	WT	WT	WT	WT	WT	R1688C	WT	X2698_splice T2611I L3030M	S4894Kfs*7 E2849K	WT	WT	WT	WT	WT	WT	Q873H	WT	WT	R283G	R2017C	WT	WT	WT	A2107V	WT	WT	WT	K1850Rfs*7	WT	WT	WT	WT	WT	WT
coadread_dfci_2016	coadread_dfci_2016_3091	Y5*	WT	WT	WT	WT	WT	P1420H	WT	WT	WT	WT	P2837H	H397R	M3993I	C3395S	WT	G1744D	A3046S	WT	WT	WT	R256H A1043T P1499H C2294*	WT	WT	WT	G854Vfs*8	WT	WT	WT	WT	WT	WT	P385S P169L R1394H	WT	R2174H	E1093Kfs*6	A2356V	WT	A317T	WT	WT	I1952N	WT	WT	WT	WT	E2004Rfs*9	P609T
coadread_dfci_2016	coadread_dfci_2016_3611	K450N F4066V	R946*	T4364A	F93L D1061N	S2775R	WT	A238D P617T I771M	WT	F2839V E2852*	WT	WT	E2324K A248T	P2408S	S2411P	WT	WT	R2041H	WT	WT	WT	R2682Q I2630T	S265Y	WT	R1956*	WT	E611G	WT	WT	WT	WT	WT	WT	WT	R657H	WT	L1121I	N443S	E69D	WT	WT	WT	WT	WT	WT	E84D	WT	WT	WT
coadread_dfci_2016	coadread_dfci_2016_189255	N749D	R758Gfs*24 R1371S	T4893M	WT	WT	C1851F	E1595K	WT	WT	WT	WT	A1029V	G1425*	WT	S489I	E314del	E3784=	WT	R732W R2250Gfs*54	G475S	X1248_splice	C473F	WT	WT	Y1793H	WT	WT	WT	WT	WT	WT	P858H	E1152K	WT	WT	WT	R1343H	WT	WT	R588H V2792M	WT	WT	WT	WT	WT	WT	WT	WT
coadread_dfci_2016	coadread_dfci_2016_2379	WT	R531*	WT	R209W	WT	WT	X436_splice	R1411H	WT	WT	WT	D2991G	WT	WT	R1547H	R294C	E2496K A2088T	R1181H	A1245T D3891N	WT	WT	WT	WT	WT	R1782C Q2642*	WT	T1828M	WT	WT	WT	WT	WT	WT	WT	WT	WT	WT	WT	WT	WT	A2188V	WT	WT	R803H	V832I	K1843Rfs*31	WT	WT
coadread_dfci_2016	coadread_dfci_2016_3225	W179R R1713C	WT	T4611M	WT	WT	WT	WT	T745M	WT	WT	WT	WT	WT	WT	WT	WT	P4030L P2696L	R2193C	S2022A	M1108I	R1405C	WT	WT	WT	WT	WT	WT	A336T	WT	WT	WT	WT	WT	WT	WT	WT	WT	WT	WT	E2693K A907V	WT	W740C	WT	WT	WT	N1609Kfs*39	WT	WT
coadread_dfci_2016	coadread_dfci_2016_546	T2185A	WT	WT	WT	R3041* R1893Q	WT	WT	WT	R6284C	WT	E3853K T1341M V2016A	WT	WT	G4547R	G3027R	WT	WT	P3464H	K3694N	WT	WT	WT	WT	WT	R651C	G854Vfs*8	R1480H	WT	WT	WT	R2176H T2564A	A1088S L2589P	WT	WT	WT	WT	WT	WT	WT	T807M	WT	WT	WT	R311K	R1050H	WT	WT	R4272* Q357Vfs*16
coadread_dfci_2016	coadread_dfci_2016_3451	P2649S	WT	WT	WT	N312D R132P	R4364Q	P907S	X2502_splice	T6593Nfs*2	WT	S3593L	WT	WT	WT	P403T	WT	WT	WT	WT	WT	WT	E494G	R1768H	WT	R3453*	WT	WT	Y3727*	WT	WT	WT	WT	WT	WT	WT	WT	E2363Rfs*23	G1700=	WT	E881K	P1204L	X1538_splice E166V	WT	A932V	R1049C Y7Tfs*6	WT	WT	X107_splice K3470N
coadread_dfci_2016	coadread_dfci_2016_354	WT	S1240Afs*15	WT	WT	WT	T4421Nfs*34	WT	WT	WT	H876R	WT	R389W Q2352H	WT	WT	I71Lfs*3	WT	WT	H3202Pfs*18	WT	N1616T	V3095A	WT	L501S	WT	WT	WT	WT	WT	WT	WT	WT	WT	WT	WT	D2356G R2619H	WT	D1521N	WT	A317S	R363H	WT	WT	WT	WT	WT	WT	WT	WT
coadread_dfci_2016	coadread_dfci_2016_280091	WT	WT	WT	WT	WT	T4421Qfs*72 G3570Efs*50	WT	WT	Q6669H	WT	R293W Q1772H	G888Vfs*8	G2213V	WT	WT	K280N	WT	WT	P3514L R3003C D2695N	D2138Tfs*111 T26M	WT	WT	WT	WT	W1694*	R2025H	WT	WT	S600N	WT	F2218L	WT	WT	R294*	T1225M	WT	WT	WT	WT	WT	C2378S	D1684Y	WT	WT	V832I	WT	WT	S809R
coadread_dfci_2016	coadread_dfci_2016_3721	WT	WT	WT	WT	WT	WT	WT	P2108S	WT	WT	WT	WT	WT	WT	WT	WT	WT	X1043_splice	WT	WT	WT	WT	WT	WT	WT	WT	WT	WT	R531W	V2326A X55_splice	WT	WT	WT	WT	WT	WT	R1452H	WT	WT	WT	WT	R107Q	P284Rfs*26 A52V	WT	WT	WT	WT	V717A
coadread_dfci_2016	coadread_dfci_2016_3643	Q926Nfs*19	WT	WT	WT	WT	P4378L D3256Y	WT	R146*	S1830Vfs*11	WT	WT	WT	WT	WT	WT	WT	R2989Gfs*20	WT	WT	WT	A964V	D1036N D2658Y	WT	WT	WT	WT	WT	R1787C	WT	R1960Q	WT	A953T	E31K	D1546G	WT	G381Afs*38	WT	WT	P736S	WT	G325R R1357W A1391V	WT	WT	WT	A139T	WT	P2398L	WT
coadread_dfci_2016	coadread_dfci_2016_1762	WT	WT	E4423K	WT	WT	A3750V	WT	K2789N	K185N	WT	WT	WT	WT	WT	WT	WT	WT	R2788L	V3473M A2905V	WT	WT	WT	WT	WT	WT	WT	WT	I3349T E4055Rfs*50	WT	WT	WT	R3036H G2749C	WT	T1939M	WT	WT	WT	WT	WT	WT	WT	Q301Sfs*23	WT	WT	WT	WT	WT	WT
coadread_dfci_2016	coadread_dfci_2016_3641	WT	A1063V	WT	WT	WT	WT	WT	WT	L359P P6048S X469_splice	X257_splice A223D	L3810M	WT	A1279D	WT	WT	WT	WT	WT	WT	R2623M	WT	R1475C	WT	WT	WT	WT	WT	WT	WT	WT	R1543W	C1125Mfs*4	WT	WT	G60S	WT	WT	WT	WT	P1192S	T455A	WT	WT	S90Afs*4	R1102M G853Rfs*42	WT	WT	WT
coadread_dfci_2016	coadread_dfci_2016_3269	E3887del	K279Nfs*8	WT	WT	R2723H	WT	I232V	WT	WT	WT	WT	WT	WT	WT	WT	WT	Y2461H	S2883G	WT	WT	WT	G2299R	WT	WT	F2228I	WT	WT	WT	WT	WT	V1678A	WT	WT	WT	WT	WT	WT	WT	WT	WT	WT	WT	WT	WT	R483Q	WT	WT	K4111N R927W
coadread_dfci_2016	coadread_dfci_2016_352983	WT	A1178Dfs*77	WT	E1365*	S2787N	WT	WT	WT	D6055N	WT	WT	WT	R1099W	WT	WT	P891H	WT	S2460N	WT	WT	WT	P596T	WT	WT	WT	P634H	WT	WT	WT	WT	WT	WT	WT	WT	WT	WT	S2512T	T1865P	WT	X3785_splice	G1559C	WT	G2022S R425M	WT	WT	WT	X531_splice	WT
coadread_dfci_2016	coadread_dfci_2016_1225	WT	WT	WT	S216L	WT	WT	WT	WT	WT	WT	I4285V	WT	WT	WT	WT	WT	WT	WT	Y3011C	WT	WT	WT	WT	WT	WT	WT	WT	WT	WT	WT	P1246H	R3085Q	WT	WT	WT	R1906G	WT	WT	WT	WT	WT	WT	WT	WT	WT	P1098L	A2407= V503I	WT
coadread_dfci_2016	coadread_dfci_2016_92	I514T	WT	A1283S	WT	WT	WT	N815D	WT	WT	WT	Q2829R	WT	WT	WT	WT	WT	WT	WT	WT	WT	S225I	WT	WT	R810Q	WT	WT	WT	WT	WT	WT	WT	WT	D913G	WT	R460Q	WT	G336R	A1664V	WT	WT	WT	A723V	S772L	WT	WT	WT	A2115S	F47V
coadread_dfci_2016	coadread_dfci_2016_261	D2535Y	WT	P4357L	WT	WT	A1819T	WT	I3284N	R6035H A6465V	WT	WT	WT	G1518=	S3826A	T3150P	K35T P595L	WT	WT	A99T	WT	WT	WT	G2381=	WT	WT	X1799_splice	WT	A2890D	WT	E1788D	WT	G752D	WT	WT	WT	WT	WT	WT	WT	WT	WT	WT	WT	WT	WT	A2658Rfs*8	WT	R56M
coadread_dfci_2016	coadread_dfci_2016_341	X1827_splice	WT	T1981I A5128T	D309N	WT	G3570Efs*50	X436_splice	X2502_splice	WT	WT	F4079Lfs*80	WT	G510S	WT	WT	WT	Y4425H	G1767V	WT	WT	V2905I	WT	WT	WT	WT	R433H	WT	R3640W	WT	A476V	WT	WT	WT	WT	T2561M	WT	WT	V629I	G735R	E2236K	G2078S	G319V	G2022R	WT	WT	WT	WT	WT
coadread_dfci_2016	coadread_dfci_2016_3658	WT	R1315Efs*13	WT	WT	WT	I192T	WT	WT	I4481V	WT	WT	WT	WT	WT	WT	S1124L	WT	WT	WT	X1449_splice	WT	WT	WT	WT	WT	D1315G	WT	WT	R1137C	WT	WT	WT	WT	WT	WT	R349C	WT	WT	WT	WT	WT	WT	WT	R921*	WT	WT	X531_splice	V4276Wfs*6
coadread_dfci_2016	coadread_dfci_2016_2641	WT	WT	WT	WT	WT	WT	WT	L58*	WT	V1386I	WT	WT	WT	R4843H L4125F	WT	WT	R933H	WT	WT	WT	WT	WT	WT	WT	WT	WT	WT	I2016Yfs*5	WT	WT	I658F	R2138Q	WT	WT	WT	WT	R1856W	WT	WT	WT	WT	WT	WT	WT	WT	K1843Rfs*31	WT	WT
coadread_dfci_2016	coadread_dfci_2016_55	WT	WT	WT	WT	R2768Q A2551V	WT	P263A	WT	WT	WT	WT	WT	WT	C4958F	D2588G	WT	WT	WT	G2571V	WT	WT	N75T	WT	R942C	WT	WT	WT	WT	WT	WT	WT	WT	WT	WT	WT	WT	WT	WT	L188I	WT	WT	WT	WT	N1289Kfs*5	WT	WT	WT	WT
coadread_dfci_2016	coadread_dfci_2016_3152	WT	WT	W2320C	WT	WT	WT	X436_splice D504V	T2292A	A3809V	WT	R3823H G2805V	WT	WT	W4656*	A1578V	G1064D	WT	S3349C	WT	WT	X1248_splice S605Ffs*6	WT	WT	WT	WT	WT	WT	WT	Y10C	N1671Ifs*4 L1088Afs*4	V2267I	R499H	R956C	WT	WT	WT	WT	A2536T	WT	WT	WT	R1028*	T1460M	WT	WT	K1843Rfs*31	V347A	K3438Nfs*2
coadread_dfci_2016	coadread_dfci_2016_1231	WT	T294Qfs*70	WT	WT	WT	WT	WT	R585H F3616del	WT	WT	A3300V T3211M	WT	WT	R60Q	V3070I T2797M	WT	WT	R2180W G1973S P753L	WT	R1054H	WT	WT	WT	WT	WT	WT	WT	R834W	R1067W	WT	I1564T	R1450*	A1243T	R320W	WT	WT	WT	WT	WT	T569M	WT	WT	WT	WT	T343M	K104Qfs*38	WT	H4009R
coadread_dfci_2016	coadread_dfci_2016_523	WT	WT	WT	WT	L2035S	S1830N M1542I	WT	WT	WT	WT	P3144L	V1861Cfs*50	WT	WT	WT	WT	R881H	WT	WT	WT	WT	WT	G849R	R2101Q	R3110*	WT	D967N	WT	WT	T1800M	V2548A	WT	A1034V A1170T	WT	WT	WT	WT	WT	WT	WT	WT	WT	WT	WT	WT	WT	WT	R927W
coadread_dfci_2016	coadread_dfci_2016_2197	WT	WT	G1231S	WT	P1878Hfs*89	WT	K1263Rfs*2 N1908Tfs*18 V125Wfs*11	WT	WT	WT	WT	WT	WT	WT	WT	WT	WT	WT	R1085Q	WT	WT	WT	S2355L	D753N	A2360T	T1046Hfs*17	WT	WT	WT	WT	WT	WT	WT	WT	V1188I	Y835H	WT	A458V	WT	WT	A1086T	WT	WT	WT	WT	WT	WT	WT
coadread_dfci_2016	coadread_dfci_2016_4500	S3836Afs*21	WT	T4431A T2432M	WT	V2222M	D2106N	A1550Lfs*8	WT	WT	WT	WT	WT	WT	V4521I	WT	WT	WT	WT	Y3559H	WT	WT	P540L	WT	WT	WT	WT	R917L	WT	WT	WT	WT	S2424L	WT	P981L	WT	WT	R1070C	WT	P904R	V2363M G3110R	WT	S390L	WT	WT	WT	WT	WT	WT
coadread_dfci_2016	coadread_dfci_2016_683	WT	K279Nfs*8	E659K P4386L X453_splice T2311I	WT	WT	WT	WT	WT	WT	V511A	WT	WT	WT	S3016R	T1741M	WT	WT	WT	R3253W	WT	WT	WT	WT	P1286L	WT	WT	V860A	R1604H V332A	WT	WT	A2344T	T1207A	WT	R772C	R1906*	WT	D571H Q1950R	WT	WT	WT	WT	WT	WT	WT	WT	S2362L	WT	WT
coadread_dfci_2016	coadread_dfci_2016_368	WT	WT	WT	S293N	E552A A1393T	WT	WT	WT	WT	WT	WT	WT	WT	D4290N	A1733T	WT	WT	WT	E2573A	N859D	WT	WT	WT	WT	WT	WT	WT	WT	WT	WT	WT	R1262W	WT	WT	WT	WT	WT	WT	WT	WT	T1603M	WT	WT	WT	WT	A38V	WT	WT
coadread_dfci_2016	coadread_dfci_2016_2936	L99*	WT	WT	R809H	Q1247Sfs*57	H458R	WT	I3284Nfs*10	V6089I X1526_splice	WT	A3962T	WT	N481Kfs*6	P785T	WT	WT	N126Ifs*20	WT	L164Ffs*49 R2550H	H500R	Y2007H	WT	WT	WT	WT	WT	X1127_splice	G5E	WT	WT	R1370*	WT	WT	WT	WT	A676V	A392V	WT	WT	WT	WT	WT	WT	C909Vfs*5	S336R	WT	D414V	WT
coadread_dfci_2016	coadread_dfci_2016_458	WT	WT	A3603V	V802M Y1256H	WT	WT	WT	WT	WT	WT	A1943T I31M	WT	WT	WT	WT	WT	WT	WT	WT	WT	WT	WT	WT	WT	WT	WT	WT	WT	T744M	WT	T1963M	WT	D1095N	WT	WT	WT	WT	WT	R912W	WT	Y1938H A721V	WT	WT	WT	WT	WT	WT	WT
coadread_dfci_2016	coadread_dfci_2016_2564	WT	WT	WT	WT	L811*	WT	WT	L3487Pfs*24	D6356Y	V1007A	WT	WT	R712H	WT	WT	A829S	G1007Efs*19	WT	WT	WT	WT	WT	WT	WT	WT	WT	WT	WT	WT	T1435S	WT	WT	R792*	WT	WT	WT	WT	R1563*	WT	WT	WT	WT	WT	WT	WT	WT	T2676M	R370Q P125S
coadread_dfci_2016	coadread_dfci_2016_2354	WT	WT	WT	T1205A	WT	WT	WT	WT	WT	WT	D2091G	WT	WT	P4117S	WT	WT	WT	WT	WT	WT	WT	WT	WT	WT	WT	WT	D246N	P2867L	WT	WT	WT	WT	WT	WT	WT	WT	WT	WT	WT	WT	WT	WT	WT	WT	WT	WT	R2431S	WT
coadread_dfci_2016	coadread_dfci_2016_3535	WT	WT	WT	WT	WT	WT	WT	WT	P6530L	F637I	WT	WT	WT	WT	X3079_splice	WT	WT	WT	WT	WT	WT	R2C P1169T	WT	E663Sfs*78	WT	WT	WT	V388A	WT	A741V	WT	WT	L1018M	WT	E629D	WT	WT	A453V	Q806P	WT	WT	WT	S1749Efs*32	WT	WT	WT	L1842Yfs*10 N2745D	WT
coadread_dfci_2016	coadread_dfci_2016_2944	WT	WT	WT	WT	WT	A3689V	WT	Q3918H	WT	R1384Q	WT	WT	WT	R924K	WT	V518M	A4471V A4166V	R3180H	R3664W	WT	WT	A3000T	WT	T1838A	G1104V	WT	WT	WT	WT	A1731V	R1167H	WT	WT	WT	WT	S1844L	WT	WT	WT	WT	WT	WT	WT	WT	S448N	R2479H	F80V	R4237C
coadread_tcga	TCGA-AA-A022-01	WT	WT	WT	WT	WT	WT	WT	Q2962R	WT	R382W R295H	WT	WT	WT	L1231P	A563V	WT	WT	WT	WT	WT	WT	S2281Y G755S	WT	WT	WT	WT	E1256A	WT	D854Tfs*33 T465A	WT	WT	WT	R205H	WT	R2026*	WT	WT	R2855H R429W	WT	WT	R2520Vfs*16	E2343*	WT	A919T	WT	WT	L362Yfs*17	WT
coadread_dfci_2016	coadread_dfci_2016_227039	X3826_splice	WT	WT	WT	WT	WT	WT	S3901Rfs*40	K6569E	WT	WT	WT	WT	WT	WT	E155K A792T	WT	WT	WT	WT	WT	WT	WT	WT	WT	T249M	WT	WT	WT	WT	WT	WT	WT	C891Y	WT	WT	WT	WT	WT	WT	WT	WT	WT	WT	WT	P2038L S677G	WT	WT
coadread_tcga	TCGA-AA-3966-01	Q312R	WT	T2080A E2447Vfs*233	WT	WT	WT	I1753V	WT	WT	WT	WT	WT	R763*	S874Y L3453W	WT	R657H	WT	WT	WT	G381E	WT	WT	K3953N	WT	WT	WT	G170R G1349S	WT	WT	T1800M	WT	WT	WT	R1717C	R34W	WT	G1460D	WT	WT	WT	WT	WT	WT	WT	I85S	V523L	L1060Cfs*41	R4534H
coadread_dfci_2016	coadread_dfci_2016_390	Q3876Sfs*30	WT	WT	WT	WT	WT	WT	WT	X1526_splice A27=	WT	N4125Tfs*34	WT	WT	WT	G955S	A329V	WT	WT	WT	WT	R2251*	WT	P4644S	WT	WT	WT	WT	WT	WT	WT	K2547E	D1446G	WT	WT	WT	WT	WT	WT	WT	WT	WT	R1725H	WT	R803C	WT	WT	WT	R1746C
coadread_dfci_2016	coadread_dfci_2016_162841	E2899K	S71N I962Ffs*16	WT	WT	WT	WT	WT	WT	WT	WT	WT	R488W	K1003N	WT	WT	WT	R2255H	WT	WT	WT	WT	WT	WT	A1501T	WT	WT	WT	WT	WT	WT	WT	WT	WT	WT	WT	WT	WT	WT	WT	S2444L	WT	WT	WT	WT	WT	WT	WT	WT
coadread_dfci_2016	coadread_dfci_2016_134258	R4273H	WT	P3032H A3543T	WT	WT	A4355V	WT	K1054N	WT	WT	WT	WT	WT	WT	WT	WT	S2641R D2243N	WT	WT	WT	WT	WT	A4035T	V449I	WT	WT	WT	WT	WT	WT	G2370D	WT	A1543V S1169Kfs*78	WT	Y2250Mfs*4	WT	WT	WT	WT	WT	WT	WT	WT	WT	WT	WT	A1771T	R115Q
coadread_dfci_2016	coadread_dfci_2016_140903	WT	WT	A585T W80R R1348H	WT	WT	R1627H	WT	WT	WT	WT	WT	WT	WT	WT	WT	WT	WT	R2193C	WT	WT	WT	WT	X1108_splice	WT	WT	WT	WT	I2340T	WT	WT	E637G	R1588H	WT	R1788Q	WT	P1212Lfs*4	WT	WT	WT	A291T	WT	WT	L961P	WT	WT	WT	WT	WT
coadread_dfci_2016	coadread_dfci_2016_3202	N2531D	WT	WT	WT	WT	WT	WT	WT	WT	WT	WT	WT	WT	WT	WT	WT	WT	X775_splice	WT	WT	WT	R1475C	WT	WT	R2290H	WT	H1587R E1679D	WT	WT	WT	WT	WT	WT	P2073del	WT	WT	WT	WT	Y765H	WT	WT	WT	T82I	WT	WT	WT	X531_splice	WT
coadread_dfci_2016	coadread_dfci_2016_3498	WT	R424*	T1894M	T70M	WT	K873Nfs*4	WT	L58*	WT	WT	WT	D2245G	WT	WT	WT	WT	WT	R890H	WT	WT	A589G	A3000T	WT	WT	WT	WT	WT	WT	WT	WT	H2471Tfs*58	WT	WT	WT	WT	WT	WT	WT	WT	WT	WT	WT	WT	WT	WT	WT	WT	WT
coadread_dfci_2016	coadread_dfci_2016_3174	WT	W45G	WT	WT	WT	WT	A1417S	WT	WT	R995C	WT	WT	WT	F1172Sfs*19	WT	A1246E	WT	WT	R127M	WT	A264T	R2988H G1440R	WT	WT	WT	Q1627*	WT	G3736D	WT	T1575M	WT	C844Y	WT	R514H R2060*	WT	V501A	R2307W	L588S	WT	WT	WT	WT	WT	WT	WT	WT	WT	WT
coadread_dfci_2016	coadread_dfci_2016_4430	WT	WT	T4815M	WT	WT	WT	X640_splice	E296G	WT	F540S	M582T	WT	WT	R1668H	WT	WT	WT	WT	WT	WT	R977C	R1334I	WT	WT	T706K	WT	WT	WT	WT	WT	WT	R1408C	WT	WT	WT	WT	WT	WT	WT	WT	L144M	A733T	A1354V	WT	WT	WT	R2332H R1876G	I3047N K1175Nfs*6
coadread_tcga	TCGA-AA-3877-01	WT	WT	WT	WT	WT	WT	WT	WT	WT	WT	WT	WT	WT	WT	WT	WT	WT	WT	WT	WT	WT	WT	WT	WT	WT	WT	WT	R2986Q R2935Q	WT	WT	WT	WT	WT	WT	WT	WT	T1610I R1725Q	WT	WT	R2195W S960N	D535Mfs*34	WT	WT	WT	WT	WT	WT	WT
coadread_dfci_2016	coadread_dfci_2016_3094	WT	WT	WT	A1417S	WT	WT	R1584M E456K	X2245_splice	Y198H	F1212Lfs*26	WT	WT	T2514A	D193Y	WT	WT	F4484L L2737M	WT	WT	WT	WT	V266A E465D	R3028C	WT	P70Q	WT	WT	WT	WT	WT	L1534F	WT	WT	WT	WT	WT	R1865W	WT	K575R	WT	G1457S	WT	D1515N	Q305*	WT	WT	WT	A1582V
coadread_dfci_2016	coadread_dfci_2016_3676	WT	WT	WT	T1281M	WT	WT	WT	WT	WT	WT	A4321T	WT	WT	WT	WT	A62Hfs*11	WT	WT	R2260C	WT	WT	WT	WT	WT	WT	G3027Wfs*19	WT	WT	WT	WT	WT	WT	WT	WT	WT	WT	WT	WT	WT	WT	WT	WT	E1053K	WT	WT	R529Q	R941M	WT
coadread_dfci_2016	coadread_dfci_2016_1230	WT	WT	WT	WT	WT	WT	WT	WT	WT	K706Nfs*25	WT	WT	WT	S1596C	WT	WT	WT	WT	WT	WT	K889Sfs*46	WT	P3941S	WT	WT	P3003Qfs*74	WT	WT	WT	WT	A1138V	WT	WT	WT	WT	WT	WT	WT	WT	WT	G1602S	WT	WT	WT	WT	WT	WT	WT
coadread_dfci_2016	coadread_dfci_2016_112	WT	WT	WT	T122M	WT	E1697K	V410M	WT	WT	P908L	WT	WT	R1084C	WT	WT	A167V	A445V R3957H	WT	WT	Q206R	G3366E	A1943V C980G C159R G379E	G1131S	WT	V3365I	A888V	WT	WT	R187W	E1539K	WT	WT	WT	R742K	R2174H	WT	R1261C	WT	WT	V3540I T807M G1605R	WT	WT	WT	WT	WT	WT	R2332C	WT
coadread_dfci_2016	coadread_dfci_2016_2257	A2287D	WT	WT	WT	L1395S	WT	WT	WT	WT	R1556G V1716Lfs*9	WT	WT	L18*	WT	WT	G1094S	WT	WT	WT	WT	WT	WT	WT	WT	WT	WT	WT	V500I	WT	WT	WT	WT	WT	WT	WT	WT	WT	WT	WT	WT	WT	WT	WT	WT	WT	WT	WT	WT
coadread_dfci_2016	coadread_dfci_2016_3422	WT	WT	T2619A A1817V	WT	WT	WT	WT	S1353G	X6620_splice	WT	WT	WT	WT	L4170M	E1204V	WT	WT	WT	WT	WT	WT	WT	WT	WT	WT	WT	WT	WT	WT	WT	I2542V	WT	R366* R1189L	WT	WT	WT	WT	G116E	WT	WT	WT	WT	WT	WT	WT	R308C R308H	WT	WT
coadread_tcga	TCGA-AA-3516-01	WT	R1164*	WT	WT	WT	WT	K1506I	A3628V	S6077N	WT	WT	WT	WT	WT	WT	WT	WT	WT	WT	G1545D	WT	WT	WT	S1878G	D1611H	WT	WT	WT	H383R	T2262I	WT	F1267V	WT	WT	WT	WT	WT	A1371T	WT	WT	WT	WT	WT	WT	WT	WT	WT	WT
coadread_dfci_2016	coadread_dfci_2016_111	P513H	WT	WT	WT	WT	WT	WT	WT	WT	WT	H191Q	WT	WT	WT	WT	WT	T2357M P4247H	WT	S3712P	WT	WT	WT	WT	WT	WT	WT	V615=	WT	A587T	WT	WT	WT	WT	R158Q	WT	WT	WT	WT	WT	WT	WT	WT	WT	H1114Y	WT	WT	WT	WT
coadread_tcga	TCGA-AA-3845-01	WT	WT	WT	WT	K200N	WT	WT	WT	WT	S980L	WT	WT	E66D	WT	WT	WT	WT	WT	WT	WT	I1717*	WT	WT	R491C	WT	R581H	Y209C	P157H	WT	WT	WT	WT	WT	WT	WT	WT	R1740C	WT	WT	WT	WT	R67Q	WT	WT	WT	WT	WT	WT
coadread_dfci_2016	coadread_dfci_2016_3653	WT	WT	WT	WT	WT	WT	WT	WT	WT	WT	WT	WT	WT	WT	WT	R651H	P4520T	WT	R3555C	R270L R1575C	R2442* Y2452C	R2988C	K367N	WT	WT	WT	R1357W	WT	Q242P	WT	WT	WT	R248C S706I	WT	WT	WT	WT	WT	WT	WT	WT	WT	WT	R903I	WT	V362I	WT	WT
coadread_dfci_2016	coadread_dfci_2016_3025	WT	WT	WT	WT	WT	WT	WT	WT	WT	WT	WT	WT	WT	WT	WT	L452I K402R	WT	WT	WT	V74I	WT	WT	WT	WT	WT	WT	WT	WT	WT	WT	WT	WT	R1051Q	WT	WT	A1351T	WT	WT	R897C	WT	WT	WT	R419Sfs*73	WT	WT	WT	WT	WT
coadread_tcga	TCGA-AA-3821-01	WT	WT	WT	WT	P1404S	WT	WT	WT	WT	WT	WT	WT	WT	WT	WT	WT	WT	WT	WT	WT	WT	WT	*5006fs R1958Q D1982A	WT	WT	M1698L R1286H	WT	S2438N	WT	WT	MK2134IE	WT	WT	WT	E1919Gfs*37 D774G	WT	WT	WT	WT	G1786R	WT	WT	WT	WT	WT	Q2337R	WT	G1396R
coadread_dfci_2016	coadread_dfci_2016_3399	WT	R434Q R22Q R804*	WT	S1131L	WT	WT	WT	WT	WT	WT	WT	WT	WT	WT	WT	WT	WT	WT	WT	WT	WT	WT	WT	E2035K	WT	WT	WT	WT	WT	WT	WT	WT	WT	WT	WT	WT	G1929R	WT	WT	WT	WT	WT	WT	R708C	WT	WT	R2489C	WT
coadread_dfci_2016	coadread_dfci_2016_2423	WT	WT	WT	WT	WT	WT	WT	WT	WT	WT	WT	WT	WT	K4959E	WT	WT	V2089I	WT	WT	WT	WT	WT	WT	WT	WT	D1315N	WT	WT	WT	WT	WT	WT	WT	WT	WT	WT	WT	WT	WT	WT	WT	WT	WT	WT	WT	WT	WT	WT
coadread_dfci_2016	coadread_dfci_2016_302124	T4202A	WT	WT	WT	WT	WT	WT	WT	WT	WT	WT	WT	WT	WT	WT	WT	WT	WT	WT	WT	WT	WT	R2479G	WT	WT	WT	WT	WT	WT	WT	WT	WT	WT	WT	WT	WT	WT	A2536T	P763S	WT	A1252V	WT	WT	WT	WT	WT	WT	WT
coadread_dfci_2016	coadread_dfci_2016_2372	WT	WT	WT	WT	T1704M R156H	WT	L1048R Q1949*	WT	WT	WT	WT	WT	WT	WT	WT	WT	WT	WT	WT	WT	WT	WT	WT	WT	WT	WT	K1006T	WT	WT	WT	WT	WT	WT	WT	WT	WT	WT	WT	G130V	WT	WT	WT	WT	WT	WT	WT	WT	WT
coadread_dfci_2016	coadread_dfci_2016_4538	WT	WT	WT	A706V	WT	T3421M	WT	WT	WT	WT	WT	WT	WT	WT	WT	WT	WT	WT	WT	WT	WT	WT	X3281_splice	WT	WT	WT	WT	WT	WT	WT	WT	WT	WT	WT	WT	WT	WT	WT	WT	WT	WT	WT	WT	WT	WT	WT	WT	WT
coadread_dfci_2016	coadread_dfci_2016_115875	WT	WT	WT	WT	WT	R1872*	WT	WT	K2676E	WT	WT	WT	D843N	WT	WT	WT	T2369M	WT	WT	WT	T235A T567P I628F	G2770R	WT	WT	WT	WT	K1277N	WT	WT	WT	I2487T	WT	WT	R636H	WT	E1093Kfs*6	N1988S	WT	WT	WT	G2593V	WT	WT	WT	A324V	R953Q	WT	L4948P
coadread_dfci_2016	coadread_dfci_2016_462	R4063*	WT	WT	WT	WT	WT	WT	WT	WT	WT	WT	WT	WT	WT	R1576H	WT	WT	WT	WT	WT	WT	WT	WT	WT	WT	WT	WT	V2632I	WT	WT	WT	WT	WT	WT	WT	V589I	WT	WT	V716M	T1147M	WT	WT	WT	R902C	WT	WT	WT	WT
coadread_dfci_2016	coadread_dfci_2016_2281	R552C	WT	WT	WT	WT	WT	WT	G3670R S2187R	WT	WT	A192T	WT	WT	WT	R1345Q	WT	D2910N	P676S	WT	WT	WT	P997S	X4427_splice	WT	WT	WT	WT	WT	WT	WT	WT	WT	G1133R	WT	WT	WT	WT	WT	WT	WT	WT	WT	WT	WT	WT	WT	WT	WT
coadread_dfci_2016	coadread_dfci_2016_2227	WT	WT	WT	WT	R966W	WT	WT	WT	WT	WT	WT	R2432W	WT	L1846R	WT	WT	WT	WT	WT	WT	WT	WT	WT	WT	WT	WT	WT	T973M	WT	WT	WT	WT	WT	WT	WT	I1037V	WT	WT	G90R	WT	WT	WT	P1480L	WT	F572L	A1122V	N2585Ifs*74	WT
coadread_dfci_2016	coadread_dfci_2016_2674	WT	WT	WT	WT	WT	WT	WT	WT	WT	R159*	WT	WT	G2681S	WT	WT	WT	WT	WT	WT	WT	WT	WT	WT	WT	WT	WT	WT	WT	WT	WT	A2533V	WT	WT	WT	WT	R1939H	WT	WT	WT	T569M	WT	WT	WT	WT	WT	WT	WT	WT
coadread_dfci_2016	coadread_dfci_2016_3184	WT	WT	WT	WT	WT	WT	WT	WT	WT	WT	WT	WT	WT	WT	WT	WT	WT	F2764L	E3572K	WT	WT	WT	WT	WT	WT	WT	WT	WT	WT	WT	WT	WT	WT	WT	WT	WT	WT	WT	WT	WT	WT	WT	WT	WT	WT	WT	WT	WT
coadread_dfci_2016	coadread_dfci_2016_4514	WT	WT	WT	WT	WT	WT	WT	WT	WT	WT	WT	WT	WT	WT	WT	WT	WT	WT	WT	WT	WT	WT	R4279H	WT	E3251K	WT	WT	WT	WT	WT	WT	WT	WT	WT	WT	WT	WT	WT	WT	R537W	WT	WT	WT	WT	R727Q	WT	WT	R3770W
coadread_dfci_2016	coadread_dfci_2016_677	WT	WT	WT	WT	WT	WT	WT	WT	WT	WT	WT	WT	R1507Q	WT	WT	WT	WT	WT	WT	WT	WT	WT	WT	WT	WT	WT	WT	WT	WT	WT	WT	WT	WT	E1417K	WT	WT	R2307W	WT	R444H	WT	WT	WT	WT	WT	WT	V2047M	WT	WT
coadread_dfci_2016	coadread_dfci_2016_3249	WT	WT	WT	K1414R	WT	WT	WT	WT	WT	V1503A	D2874G	WT	R1084H	WT	WT	R1030H	WT	WT	WT	WT	WT	WT	WT	R810Q	WT	WT	WT	WT	WT	R714*	WT	WT	WT	WT	WT	WT	WT	WT	WT	WT	WT	WT	WT	WT	E583A	WT	WT	WT
coadread_dfci_2016	coadread_dfci_2016_2762	WT	WT	G487S	WT	R1893W	T4421Qfs*72 A860S	WT	WT	WT	WT	WT	K1959N	WT	WT	WT	WT	WT	WT	WT	R509C	Q424P	WT	WT	WT	WT	WT	WT	WT	E1661K	WT	R1291H	WT	G1196S	WT	WT	WT	WT	WT	WT	WT	WT	WT	WT	WT	WT	WT	WT	D3764V
coadread_dfci_2016	coadread_dfci_2016_1250	WT	WT	WT	WT	R132C	WT	WT	WT	WT	WT	WT	WT	WT	WT	WT	WT	WT	WT	WT	WT	WT	WT	WT	WT	WT	WT	WT	WT	WT	WT	WT	WT	WT	WT	WT	WT	WT	WT	WT	WT	WT	WT	WT	WT	WT	WT	WT	WT
coadread_dfci_2016	coadread_dfci_2016_207	L1333Wfs*19	G997Rfs*8	WT	L1426Cfs*66	Q2769R	WT	WT	WT	A589T	WT	WT	WT	WT	WT	WT	WT	WT	WT	WT	WT	WT	WT	G1138D	WT	WT	G854Vfs*8	WT	WT	WT	WT	WT	WT	WT	WT	WT	WT	WT	WT	WT	G2765Afs*31	K169Sfs*73	WT	WT	WT	WT	WT	WT	WT
coadread_dfci_2016	coadread_dfci_2016_613	WT	WT	V4857M R5094W A736T	T1459M	WT	WT	N1592S	WT	WT	WT	WT	WT	WT	WT	WT	Y566H A465V	WT	WT	WT	WT	WT	WT	G2359D	WT	WT	WT	WT	WT	L48M	A2016V	Y1316C	WT	WT	WT	WT	WT	WT	WT	WT	V3092M	WT	WT	G1761E	WT	WT	WT	G1712*	WT
coadread_dfci_2016	coadread_dfci_2016_3446	WT	WT	C4986R	WT	WT	WT	WT	WT	WT	WT	WT	WT	WT	WT	WT	E696K	WT	WT	WT	WT	WT	WT	D587Y	WT	WT	WT	WT	WT	WT	WT	WT	WT	P971S	WT	WT	WT	WT	WT	WT	WT	R678H	WT	WT	WT	WT	WT	WT	WT
coadread_dfci_2016	coadread_dfci_2016_352566	WT	WT	WT	WT	WT	WT	WT	WT	WT	WT	WT	WT	WT	I4473T	WT	WT	WT	L1790P	WT	N588Kfs*20	WT	WT	WT	WT	WT	WT	WT	WT	WT	WT	WT	WT	A1243T	WT	WT	G917C	WT	WT	WT	WT	WT	WT	WT	WT	WT	R2836G	WT	WT
coadread_dfci_2016	coadread_dfci_2016_407	L4461F	E897K	C695Y	WT	V2835M	WT	WT	WT	WT	WT	K3189T	WT	WT	WT	WT	WT	WT	WT	WT	WT	A2767V	A2122T	WT	WT	WT	WT	WT	K1167del	WT	WT	WT	WT	WT	WT	WT	WT	R1452C	WT	WT	WT	WT	WT	WT	WT	WT	WT	WT	Q2589L
coadread_dfci_2016	coadread_dfci_2016_2946	WT	WT	WT	WT	Q2769R	K440Nfs*11	WT	WT	WT	WT	WT	WT	WT	WT	WT	WT	WT	WT	WT	WT	WT	WT	WT	R2021C R474C	WT	WT	WT	WT	WT	WT	WT	WT	WT	WT	WT	WT	WT	WT	WT	WT	WT	WT	WT	WT	WT	WT	WT	WT
coadread_dfci_2016	coadread_dfci_2016_3610	WT	WT	WT	WT	WT	WT	WT	WT	WT	WT	WT	WT	E1077K	WT	WT	WT	WT	WT	WT	WT	X2996_splice	WT	WT	WT	S2391Y	WT	WT	WT	WT	WT	WT	WT	WT	WT	WT	WT	WT	WT	WT	WT	WT	WT	WT	WT	WT	WT	WT	WT
coadread_dfci_2016	coadread_dfci_2016_62	WT	WT	WT	WT	WT	WT	WT	WT	WT	WT	WT	WT	WT	WT	WT	WT	V1274F	WT	WT	WT	WT	WT	WT	WT	WT	WT	WT	WT	WT	WT	WT	WT	D1088N	R1886H	WT	G205R	WT	WT	WT	WT	WT	WT	WT	WT	WT	V362I	WT	WT
coadread_dfci_2016	coadread_dfci_2016_605	WT	T1202M	WT	WT	A100V	WT	G551E	WT	WT	WT	WT	WT	WT	WT	WT	R128H	WT	A2343T	WT	WT	WT	WT	W3405R	WT	WT	V1916I	WT	WT	R412C	WT	WT	R1400* R1149W	WT	WT	WT	WT	WT	WT	Q180H	WT	WT	WT	WT	WT	WT	WT	WT	WT
coadread_dfci_2016	coadread_dfci_2016_2565	WT	G997Dfs*40	R5134C	WT	WT	WT	WT	WT	WT	WT	WT	WT	WT	WT	WT	WT	WT	A1582V	WT	WT	R597Q	WT	WT	WT	WT	P2084S	WT	E3683G	R531Q	WT	WT	WT	WT	WT	WT	WT	WT	A453V	WT	WT	WT	WT	WT	N1206Mfs*5	WT	WT	WT	WT
coadread_dfci_2016	coadread_dfci_2016_312708	WT	WT	WT	WT	WT	WT	WT	WT	WT	WT	WT	WT	WT	WT	WT	WT	WT	WT	WT	G90S	WT	WT	WT	WT	WT	A809S	WT	WT	WT	WT	WT	WT	WT	WT	WT	WT	WT	WT	WT	WT	WT	WT	WT	WT	WT	WT	R2105W	WT
coadread_dfci_2016	coadread_dfci_2016_372	WT	WT	WT	WT	WT	WT	WT	WT	WT	WT	WT	WT	P312L	WT	WT	WT	WT	WT	WT	WT	WT	WT	WT	WT	WT	WT	WT	WT	WT	WT	WT	WT	A353V	WT	WT	WT	WT	WT	WT	WT	WT	WT	WT	WT	WT	WT	WT	WT
coadread_dfci_2016	coadread_dfci_2016_3253	WT	WT	WT	WT	WT	T2055M	WT	WT	R1222Q	WT	WT	WT	WT	WT	WT	WT	WT	WT	WT	WT	R766C	WT	WT	WT	WT	WT	WT	WT	WT	WT	WT	WT	WT	WT	WT	WT	WT	WT	WT	WT	WT	WT	WT	WT	F580L	WT	WT	WT
coadread_dfci_2016	coadread_dfci_2016_33	WT	WT	WT	WT	WT	WT	WT	WT	WT	WT	WT	WT	G1518=	WT	WT	WT	WT	WT	WT	WT	WT	F1651V	WT	WT	WT	WT	WT	A1969V	WT	WT	WT	WT	WT	WT	WT	WT	WT	WT	WT	WT	WT	WT	WT	WT	WT	WT	WT	WT
coadread_dfci_2016	coadread_dfci_2016_287	WT	WT	WT	WT	WT	WT	WT	WT	WT	E618*	WT	WT	WT	WT	WT	WT	WT	WT	WT	WT	WT	WT	WT	WT	WT	WT	WT	WT	WT	WT	WT	WT	WT	WT	WT	WT	WT	WT	WT	WT	WT	WT	WT	WT	WT	WT	WT	WT
coadread_dfci_2016	coadread_dfci_2016_4503	WT	WT	WT	T1254M	WT	WT	WT	WT	WT	WT	WT	WT	WT	WT	WT	R671Q	WT	WT	WT	T1050M	WT	WT	WT	WT	WT	WT	WT	WT	WT	WT	WT	WT	WT	WT	WT	WT	WT	WT	WT	WT	WT	WT	R1096W	WT	WT	WT	WT	WT
coadread_dfci_2016	coadread_dfci_2016_3110	WT	WT	WT	WT	WT	WT	WT	WT	WT	WT	WT	WT	WT	WT	WT	WT	WT	WT	WT	WT	I1992N	WT	WT	WT	WT	WT	R1104Q	WT	WT	WT	WT	WT	WT	WT	WT	T1674M	WT	WT	WT	WT	WT	WT	WT	WT	WT	WT	WT	WT
coadread_dfci_2016	coadread_dfci_2016_2365	WT	WT	V938I	WT	WT	E4454K	WT	WT	WT	WT	WT	WT	WT	WT	WT	WT	T1055M	WT	D2695N	WT	P3311A	WT	WT	V429M	WT	WT	WT	WT	WT	WT	WT	WT	WT	R693Q	WT	WT	WT	WT	WT	WT	WT	WT	R14H	WT	WT	WT	WT	WT
coadread_dfci_2016	coadread_dfci_2016_132	WT	WT	V4764I	WT	WT	A1620T	WT	WT	WT	WT	WT	WT	WT	WT	WT	WT	WT	WT	WT	WT	WT	R2360C	R4375Q	WT	WT	WT	WT	WT	R198Q	WT	WT	WT	WT	WT	WT	WT	WT	WT	WT	WT	R527C	WT	WT	WT	WT	G2044S	WT	WT
coadread_dfci_2016	coadread_dfci_2016_3301	WT	WT	WT	WT	G2739R	WT	WT	WT	WT	WT	WT	WT	G215V	WT	X2919_splice	WT	WT	WT	WT	WT	WT	WT	WT	WT	L1804F	WT	WT	WT	WT	WT	WT	L2565F	WT	WT	WT	WT	WT	WT	WT	WT	WT	WT	WT	WT	WT	WT	WT	WT
coadread_dfci_2016	coadread_dfci_2016_42	WT	WT	WT	WT	WT	WT	WT	WT	WT	WT	WT	WT	WT	WT	WT	WT	WT	WT	WT	WT	WT	WT	WT	WT	WT	WT	WT	WT	WT	WT	WT	G2561S	WT	WT	WT	WT	WT	WT	A729V	WT	WT	WT	WT	WT	WT	WT	WT	WT
coadread_dfci_2016	coadread_dfci_2016_299	WT	WT	P3866S	WT	WT	WT	WT	WT	WT	WT	WT	WT	WT	WT	WT	WT	WT	WT	WT	WT	WT	WT	WT	WT	WT	WT	WT	WT	WT	WT	WT	WT	WT	WT	WT	WT	WT	WT	WT	WT	WT	WT	WT	WT	WT	WT	WT	WT
coadread_dfci_2016	coadread_dfci_2016_2225	Q2914K	WT	WT	WT	WT	WT	WT	WT	WT	WT	WT	WT	WT	WT	WT	WT	WT	WT	T3049S	WT	WT	WT	WT	WT	WT	WT	WT	WT	WT	WT	WT	WT	WT	WT	WT	WT	WT	WT	WT	WT	WT	WT	WT	WT	WT	WT	WT	WT
coadread_dfci_2016	coadread_dfci_2016_402	WT	WT	WT	WT	WT	WT	WT	WT	WT	WT	WT	WT	WT	WT	WT	WT	D340Efs*14	WT	R1012H	WT	WT	WT	WT	WT	R1010H A26V	WT	WT	WT	WT	L27I	WT	WT	N64H	WT	WT	R349C	WT	WT	A658V	V3831I	WT	WT	WT	K513Q D893V	WT	WT	WT	WT
coadread_dfci_2016	coadread_dfci_2016_331889	F802Lfs*18	WT	WT	WT	WT	WT	WT	V578A	WT	WT	WT	WT	WT	WT	WT	WT	WT	WT	L1252P	WT	WT	WT	WT	WT	WT	WT	WT	WT	WT	WT	R1811Q R1803W F1932L	WT	WT	WT	WT	WT	WT	H1185R D2695Y	V678I	WT	WT	WT	WT	S843N	R874W	WT	WT	WT
coadread_dfci_2016	coadread_dfci_2016_3415	WT	WT	WT	WT	WT	WT	WT	WT	WT	WT	WT	WT	WT	WT	WT	WT	WT	WT	WT	WT	WT	WT	WT	WT	WT	WT	WT	WT	WT	V1085L	WT	WT	WT	WT	WT	WT	WT	WT	WT	WT	WT	WT	WT	WT	WT	WT	WT	WT
coadread_dfci_2016	coadread_dfci_2016_336	WT	WT	WT	WT	WT	WT	WT	WT	WT	WT	WT	WT	WT	WT	WT	WT	WT	WT	WT	WT	WT	WT	WT	WT	WT	WT	WT	WT	WT	WT	WT	WT	WT	WT	WT	R672Q	WT	WT	WT	R534C	T857M	WT	WT	WT	WT	WT	A2407=	WT
coadread_dfci_2016	coadread_dfci_2016_3427	WT	WT	WT	WT	G3039E	F3927C	WT	WT	D6556N	WT	WT	WT	WT	WT	WT	WT	WT	WT	WT	WT	WT	WT	WT	WT	WT	WT	WT	WT	WT	WT	WT	WT	WT	WT	H2245Y	WT	WT	WT	WT	WT	WT	WT	WT	WT	WT	WT	WT	WT
coadread_dfci_2016	coadread_dfci_2016_2932	WT	WT	R2628H	N174S	P3130Hfs*2	WT	V469A	WT	WT	WT	WT	WT	WT	WT	WT	WT	WT	L148P	WT	WT	WT	WT	WT	WT	WT	WT	WT	WT	WT	N1009D	WT	WT	WT	WT	WT	V593M	WT	WT	WT	T3204M	R443C	WT	WT	WT	WT	WT	WT	WT
coadread_dfci_2016	coadread_dfci_2016_3437	WT	R499Q	WT	WT	WT	WT	WT	WT	WT	WT	D1714N S2401Y	WT	WT	V3662I	WT	WT	WT	WT	A2860T	WT	WT	WT	WT	WT	WT	WT	WT	WT	H354Q	WT	WT	WT	WT	WT	WT	WT	WT	WT	WT	WT	WT	G1284S	WT	WT	M1?	R177H	WT	X4901_splice
coadread_dfci_2016	coadread_dfci_2016_213	WT	WT	WT	WT	WT	WT	WT	WT	WT	WT	WT	WT	R158Q	WT	Q2778L	WT	WT	WT	WT	H979Y	WT	WT	WT	WT	WT	WT	WT	WT	WT	WT	WT	WT	WT	R1098Q	WT	WT	WT	WT	WT	WT	WT	WT	R71C	WT	WT	WT	WT	WT
coadread_dfci_2016	coadread_dfci_2016_498	WT	WT	WT	WT	WT	WT	WT	WT	WT	WT	WT	R3007Q	WT	L4412V	WT	WT	WT	WT	WT	WT	WT	WT	G3480R	WT	WT	WT	WT	WT	WT	WT	WT	F1348L	WT	WT	WT	WT	WT	WT	WT	WT	WT	WT	WT	WT	WT	WT	WT	WT
coadread_dfci_2016	coadread_dfci_2016_636	X497_splice	WT	WT	WT	WT	WT	WT	WT	WT	WT	WT	WT	WT	WT	WT	WT	WT	WT	WT	WT	WT	WT	WT	WT	WT	WT	WT	WT	WT	WT	D1565N	WT	WT	WT	WT	WT	WT	WT	WT	WT	WT	WT	WT	WT	WT	WT	WT	WT
coadread_dfci_2016	coadread_dfci_2016_2999	WT	WT	WT	WT	WT	WT	R577W V454I	WT	WT	WT	WT	WT	WT	W1823S	WT	WT	WT	WT	WT	WT	WT	WT	E1249G	WT	WT	WT	WT	WT	WT	WT	WT	WT	A586P	WT	WT	WT	WT	WT	WT	WT	WT	WT	WT	WT	WT	WT	WT	WT
coadread_dfci_2016	coadread_dfci_2016_561	WT	WT	WT	R746C	WT	WT	WT	WT	WT	X257_splice	WT	WT	WT	WT	WT	WT	WT	WT	WT	WT	WT	WT	WT	WT	WT	WT	WT	WT	WT	WT	WT	WT	WT	WT	WT	WT	WT	WT	WT	WT	WT	WT	WT	WT	WT	WT	WT	WT
coadread_dfci_2016	coadread_dfci_2016_3205	WT	T1318M	WT	WT	WT	WT	WT	WT	WT	WT	WT	WT	WT	I1007S	WT	WT	WT	WT	WT	WT	WT	WT	WT	WT	WT	WT	WT	WT	WT	WT	WT	WT	WT	WT	S40P	R1617W	WT	WT	E934Q	V2749M	WT	WT	WT	WT	WT	WT	WT	WT
coadread_dfci_2016	coadread_dfci_2016_306	WT	WT	WT	WT	WT	WT	WT	WT	WT	R1498C	WT	WT	WT	WT	WT	WT	WT	WT	WT	WT	WT	WT	WT	WT	WT	WT	WT	WT	WT	WT	WT	WT	WT	WT	WT	WT	WT	WT	WT	WT	WT	WT	WT	WT	WT	WT	WT	WT
coadread_dfci_2016	coadread_dfci_2016_2323	WT	WT	WT	WT	WT	WT	WT	WT	WT	WT	WT	WT	WT	WT	WT	WT	WT	WT	WT	WT	WT	WT	WT	WT	WT	WT	WT	WT	WT	WT	WT	R249C	WT	WT	T1642M	WT	WT	WT	WT	WT	WT	WT	WT	WT	WT	WT	WT	WT
coadread_dfci_2016	coadread_dfci_2016_3442	WT	WT	WT	WT	WT	WT	WT	WT	WT	WT	F2903S	WT	WT	WT	WT	WT	WT	WT	WT	G1030R	WT	WT	WT	WT	WT	WT	WT	WT	WT	WT	WT	WT	WT	WT	WT	WT	WT	WT	WT	R3232C	WT	WT	WT	WT	WT	WT	WT	WT
coadread_dfci_2016	coadread_dfci_2016_2982	WT	WT	WT	WT	P2894L	WT	WT	WT	WT	WT	WT	WT	R1507W	WT	Y1389=	R125H	WT	WT	WT	WT	R2032C	WT	WT	P1152L	WT	WT	WT	WT	WT	WT	WT	WT	WT	R1498H	WT	WT	WT	WT	WT	WT	WT	WT	WT	WT	WT	WT	WT	WT
coadread_dfci_2016	coadread_dfci_2016_114	WT	WT	WT	WT	WT	WT	WT	A3628V	WT	WT	WT	WT	WT	WT	WT	WT	WT	WT	WT	WT	WT	WT	WT	WT	WT	WT	WT	WT	WT	WT	WT	WT	WT	WT	WT	WT	WT	WT	WT	R537W R2523C	WT	WT	WT	WT	WT	WT	WT	WT
coadread_dfci_2016	coadread_dfci_2016_3704	WT	R456Q	E34K	WT	WT	WT	WT	WT	A2382V Q2351Afs*35	E660G	F1574Sfs*25	WT	G2681S	WT	WT	WT	WT	WT	WT	WT	WT	WT	WT	A1341T	WT	WT	WT	WT	WT	WT	WT	WT	WT	WT	WT	A394T	WT	WT	WT	WT	WT	WT	R920Q	WT	WT	WT	WT	L1173Wfs*8
coadread_dfci_2016	coadread_dfci_2016_430	WT	WT	WT	WT	WT	WT	WT	WT	WT	WT	WT	WT	R895H	WT	WT	WT	WT	WT	WT	WT	WT	WT	WT	WT	WT	WT	WT	WT	WT	WT	WT	WT	WT	WT	WT	WT	G646R	WT	WT	WT	WT	WT	WT	WT	WT	WT	WT	WT
coadread_dfci_2016	coadread_dfci_2016_687	WT	WT	WT	WT	WT	WT	WT	WT	WT	WT	WT	WT	WT	WT	WT	WT	WT	WT	WT	WT	WT	WT	WT	WT	WT	WT	WT	WT	WT	WT	WT	WT	WT	WT	R1380W	WT	WT	WT	WT	WT	D337N	P1669S	WT	WT	WT	WT	WT	WT
coadread_dfci_2016	coadread_dfci_2016_3005	WT	WT	WT	WT	WT	WT	WT	WT	WT	WT	WT	WT	R155Q	WT	WT	WT	S1157Y	WT	WT	R654S	WT	WT	WT	WT	WT	WT	WT	WT	WT	WT	V2456I	WT	WT	WT	WT	WT	WT	WT	WT	WT	WT	WT	WT	WT	A691S H962Q	WT	WT	N755K
coadread_dfci_2016	coadread_dfci_2016_1798	WT	WT	WT	WT	WT	WT	WT	WT	WT	WT	V2052I	WT	WT	WT	WT	WT	WT	WT	WT	WT	WT	WT	WT	WT	WT	WT	P1686L	WT	WT	WT	WT	WT	WT	R198H	WT	WT	WT	WT	WT	WT	WT	WT	WT	WT	WT	WT	WT	WT
coadread_dfci_2016	coadread_dfci_2016_84	WT	WT	WT	WT	WT	WT	WT	WT	WT	WT	WT	R739H	WT	WT	WT	WT	WT	WT	R2994Q	WT	WT	WT	R4889*	X1369_splice	WT	WT	WT	WT	WT	WT	WT	WT	P1033Rfs*46	WT	WT	WT	WT	T211A	T298M	WT	WT	WT	WT	WT	WT	R2245H	R1450G K1960Sfs*10	V1983Ffs*13 S20N
coadread_dfci_2016	coadread_dfci_2016_4525	WT	WT	WT	WT	WT	WT	WT	WT	WT	WT	WT	WT	R155Q	WT	WT	WT	R1099C	WT	WT	WT	WT	WT	WT	WT	WT	WT	WT	WT	WT	WT	WT	WT	WT	WT	WT	WT	WT	WT	WT	WT	WT	WT	WT	WT	WT	WT	WT	WT
coadread_tcga	TCGA-AA-3525-01	WT	V1173M	WT	WT	WT	WT	WT	WT	WT	WT	WT	WT	WT	WT	WT	WT	WT	WT	WT	WT	WT	WT	WT	WT	V284M	WT	WT	WT	WT	WT	WT	WT	WT	R1874W	WT	WT	WT	WT	WT	WT	WT	WT	WT	WT	WT	V1845Rfs*6	WT	WT
coadread_dfci_2016	coadread_dfci_2016_2764	WT	WT	WT	WT	A1793G	WT	WT	WT	WT	WT	WT	WT	WT	WT	WT	WT	WT	WT	WT	WT	WT	WT	WT	WT	WT	WT	WT	WT	WT	WT	WT	WT	WT	WT	WT	WT	WT	WT	G653C	WT	WT	WT	WT	WT	WT	WT	A1598V	WT
coadread_tcga	TCGA-AA-3518-01	WT	WT	WT	WT	Y853H	WT	WT	WT	WT	WT	WT	WT	WT	WT	WT	WT	WT	WT	WT	WT	WT	WT	WT	WT	WT	WT	WT	WT	WT	WT	WT	WT	WT	WT	WT	WT	WT	WT	WT	WT	WT	A73V	WT	WT	WT	G456R	C314Y	WT
coadread_dfci_2016	coadread_dfci_2016_2945	WT	WT	WT	WT	WT	WT	WT	WT	WT	WT	WT	WT	WT	L1864V	WT	WT	WT	WT	WT	WT	WT	WT	WT	WT	WT	WT	WT	WT	WT	WT	WT	WT	V838I	WT	WT	WT	WT	WT	WT	WT	WT	WT	WT	WT	WT	WT	WT	WT
coadread_dfci_2016	coadread_dfci_2016_3669	WT	WT	WT	WT	T650A	WT	WT	WT	WT	WT	WT	WT	WT	WT	WT	WT	WT	WT	WT	WT	WT	WT	I4471V	WT	WT	WT	WT	A1579T	WT	WT	WT	E1764K	WT	WT	WT	WT	WT	WT	WT	WT	WT	WT	WT	WT	WT	WT	WT	WT
coadread_dfci_2016	coadread_dfci_2016_253	WT	WT	WT	WT	WT	WT	WT	WT	WT	WT	R3236C	WT	WT	WT	WT	WT	WT	WT	WT	WT	WT	WT	WT	WT	WT	WT	WT	WT	WT	WT	WT	WT	G1212D	WT	WT	WT	WT	WT	WT	WT	WT	WT	WT	WT	WT	WT	WT	WT
coadread_dfci_2016	coadread_dfci_2016_304	WT	WT	WT	WT	WT	WT	WT	WT	WT	WT	WT	WT	WT	WT	WT	WT	WT	WT	WT	WT	WT	WT	WT	WT	WT	WT	WT	WT	R97H	WT	WT	WT	WT	WT	WT	WT	WT	WT	WT	WT	WT	WT	WT	WT	WT	WT	WT	WT
coadread_dfci_2016	coadread_dfci_2016_3182	WT	WT	WT	WT	R182W	WT	WT	WT	WT	WT	WT	WT	WT	WT	WT	WT	WT	WT	WT	WT	WT	WT	T2729A	WT	WT	WT	WT	WT	WT	WT	WT	WT	WT	WT	WT	WT	WT	WT	WT	WT	WT	WT	WT	WT	WT	WT	WT	WT
coadread_dfci_2016	coadread_dfci_2016_2812	WT	WT	WT	WT	WT	WT	WT	WT	WT	WT	WT	WT	WT	WT	WT	WT	WT	WT	G1305C	WT	L1256I	WT	WT	WT	WT	WT	WT	WT	WT	WT	WT	WT	WT	WT	WT	WT	WT	WT	WT	WT	WT	WT	T271M	WT	WT	WT	WT	WT
coadread_dfci_2016	coadread_dfci_2016_2445	WT	WT	WT	WT	WT	WT	WT	WT	WT	WT	WT	WT	WT	WT	WT	WT	WT	WT	WT	WT	WT	WT	WT	WT	WT	WT	WT	WT	WT	WT	WT	WT	WT	WT	WT	WT	WT	WT	WT	WT	WT	WT	WT	WT	WT	WT	WT	WT
coadread_dfci_2016	coadread_dfci_2016_3305	WT	WT	WT	WT	D2872N	WT	WT	WT	WT	WT	WT	WT	WT	WT	WT	WT	WT	WT	WT	WT	WT	WT	WT	WT	WT	WT	WT	WT	WT	WT	WT	WT	WT	WT	WT	WT	WT	E575G	WT	WT	WT	WT	WT	WT	WT	WT	WT	WT
coadread_dfci_2016	coadread_dfci_2016_2635	WT	WT	WT	WT	WT	WT	WT	WT	WT	WT	WT	WT	WT	WT	WT	WT	WT	WT	WT	WT	WT	WT	WT	WT	WT	WT	WT	WT	WT	WT	WT	WT	WT	WT	WT	P1088A	WT	WT	WT	WT	WT	WT	WT	WT	S477T	WT	WT	WT
coadread_dfci_2016	coadread_dfci_2016_1216	WT	WT	WT	WT	WT	WT	WT	WT	WT	WT	WT	WT	A151T	WT	WT	WT	WT	WT	WT	WT	WT	WT	WT	WT	WT	WT	WT	WT	WT	WT	WT	WT	WT	WT	WT	WT	WT	WT	WT	WT	WT	WT	WT	WT	WT	WT	WT	WT
coadread_dfci_2016	coadread_dfci_2016_167191	WT	WT	WT	WT	WT	WT	WT	WT	WT	WT	WT	WT	WT	WT	WT	WT	K50N	WT	WT	WT	WT	WT	WT	WT	WT	WT	WT	WT	WT	WT	WT	WT	WT	WT	WT	R73C	WT	R516W	WT	A2449S	WT	WT	G1407R	WT	WT	WT	E2350K	WT
coadread_dfci_2016	coadread_dfci_2016_3169	WT	WT	T4795S	WT	WT	WT	WT	WT	WT	WT	WT	WT	WT	WT	WT	WT	WT	R3550W	WT	WT	WT	WT	WT	WT	WT	WT	WT	WT	WT	WT	WT	WT	WT	P1358L	WT	WT	WT	WT	WT	WT	WT	WT	WT	WT	WT	WT	WT	WT
coadread_dfci_2016	coadread_dfci_2016_2954	WT	WT	WT	WT	WT	WT	WT	WT	WT	WT	WT	WT	WT	WT	WT	WT	E1303K	WT	WT	WT	WT	WT	WT	WT	WT	WT	WT	WT	WT	WT	WT	WT	WT	WT	WT	WT	WT	WT	WT	WT	R285H	WT	S264L	WT	WT	WT	WT	WT
coadread_dfci_2016	coadread_dfci_2016_485	WT	R306Q	WT	WT	A1264V R1352W	WT	WT	WT	WT	WT	WT	R2628Q	T2562M	WT	WT	WT	WT	WT	WT	WT	WT	WT	WT	WT	WT	WT	WT	WT	WT	WT	WT	WT	WT	E83K	WT	WT	WT	WT	WT	WT	WT	WT	WT	WT	WT	WT	WT	WT
coadread_dfci_2016	coadread_dfci_2016_250	WT	WT	WT	WT	WT	WT	E22K	WT	E2033K	WT	WT	WT	WT	WT	WT	WT	WT	WT	WT	WT	WT	WT	WT	WT	WT	WT	WT	WT	WT	D1814Y	Q1577H	WT	WT	WT	WT	WT	WT	WT	WT	WT	WT	WT	WT	WT	WT	WT	WT	WT
coadread_dfci_2016	coadread_dfci_2016_3172	WT	WT	WT	WT	WT	WT	WT	WT	WT	WT	WT	WT	WT	WT	WT	WT	WT	WT	WT	WT	WT	WT	WT	WT	WT	WT	WT	WT	WT	WT	WT	WT	WT	WT	WT	WT	WT	WT	WT	WT	WT	G264S	WT	WT	WT	WT	WT	WT
coadread_dfci_2016	coadread_dfci_2016_164668	WT	WT	WT	WT	WT	WT	WT	V3533M	WT	WT	WT	WT	WT	WT	WT	WT	WT	WT	WT	WT	WT	WT	WT	WT	WT	WT	WT	WT	WT	WT	WT	WT	WT	WT	WT	WT	WT	WT	WT	WT	WT	WT	WT	R16W	WT	WT	E1109K	WT
coadread_tcga	TCGA-A6-2672-01	WT	WT	WT	WT	WT	WT	WT	WT	WT	S1012N F928I	WT	T1571A	WT	WT	P2168S	WT	WT	WT	WT	WT	WT	WT	WT	WT	WT	WT	WT	WT	WT	WT	WT	WT	WT	WT	WT	WT	WT	WT	WT	WT	WT	WT	WT	WT	WT	WT	WT	WT
coadread_tcga	TCGA-AA-A01P-01	WT	WT	WT	WT	WT	WT	WT	WT	WT	WT	WT	WT	WT	WT	WT	WT	WT	WT	WT	WT	WT	WT	WT	WT	WT	WT	WT	WT	WT	WT	A1081Rfs*17	WT	WT	WT	WT	WT	WT	S1054Y	WT	WT	WT	G1357=	WT	WT	WT	WT	WT	WT
coadread_dfci_2016	coadread_dfci_2016_607	WT	WT	WT	WT	WT	WT	WT	WT	WT	WT	WT	WT	WT	WT	WT	WT	WT	WT	WT	WT	WT	WT	WT	WT	WT	WT	WT	WT	WT	WT	WT	WT	WT	WT	WT	WT	WT	WT	WT	WT	WT	WT	WT	WT	WT	WT	WT	WT
coadread_dfci_2016	coadread_dfci_2016_1208	WT	WT	WT	WT	WT	WT	WT	WT	WT	WT	WT	WT	WT	WT	WT	WT	WT	WT	R1082Q	WT	WT	WT	WT	WT	WT	WT	WT	WT	WT	WT	WT	R683Sfs*21	WT	WT	WT	WT	WT	WT	WT	WT	WT	WT	WT	WT	WT	WT	WT	WT
coadread_dfci_2016	coadread_dfci_2016_1254	WT	WT	WT	WT	WT	WT	WT	WT	V6817M	WT	T2287M	D676E	WT	WT	WT	WT	WT	WT	WT	WT	WT	WT	WT	WT	WT	WT	WT	WT	WT	F1111L	R1370Q	WT	WT	WT	WT	WT	WT	WT	WT	WT	WT	WT	WT	WT	WT	WT	WT	Q295*
coadread_dfci_2016	coadread_dfci_2016_3430	WT	WT	WT	WT	WT	WT	WT	WT	WT	WT	WT	P26Q	WT	WT	WT	WT	WT	WT	WT	WT	WT	WT	WT	WT	WT	WT	WT	WT	WT	WT	WT	D2877N	WT	WT	A1258T	WT	WT	WT	WT	WT	R1272C	WT	WT	WT	WT	WT	WT	WT
coadread_dfci_2016	coadread_dfci_2016_1761	WT	R894C	WT	WT	WT	WT	WT	WT	WT	WT	WT	WT	WT	WT	WT	WT	WT	WT	WT	WT	WT	WT	WT	WT	WT	WT	WT	WT	WT	WT	WT	WT	WT	WT	WT	WT	WT	WT	WT	WT	WT	WT	WT	WT	E1202*	WT	WT	WT
coadread_dfci_2016	coadread_dfci_2016_344	WT	R1199H	WT	WT	WT	WT	WT	WT	WT	R1127C	R3218C	WT	WT	WT	WT	WT	WT	WT	WT	WT	WT	WT	WT	WT	WT	WT	WT	WT	WT	WT	WT	WT	WT	WT	WT	WT	WT	WT	WT	WT	WT	WT	WT	WT	WT	WT	WT	WT
coadread_dfci_2016	coadread_dfci_2016_3602	WT	R1284Q	WT	WT	WT	WT	WT	WT	WT	G1013S	WT	WT	WT	WT	WT	WT	R933H	WT	WT	WT	WT	WT	WT	WT	E2072K	WT	WT	WT	WT	WT	WT	WT	WT	WT	WT	WT	WT	WT	WT	R3849Q	WT	WT	WT	WT	A1182V P679S	WT	WT	WT
coadread_dfci_2016	coadread_dfci_2016_1797	WT	WT	WT	WT	WT	WT	WT	WT	WT	WT	WT	WT	WT	WT	WT	WT	WT	WT	WT	WT	WT	WT	WT	WT	WT	T139I	WT	WT	WT	WT	WT	WT	WT	WT	WT	WT	A383T	WT	WT	WT	WT	WT	G333S	WT	WT	WT	WT	WT
coadread_tcga	TCGA-AA-3833-01	WT	WT	WT	A982T	WT	WT	WT	WT	WT	WT	WT	WT	L216P	WT	WT	WT	WT	WT	WT	WT	WT	V472L	R4743C	WT	WT	WT	WT	WT	WT	WT	WT	K2951N	WT	WT	WT	WT	Q639R	R436W	WT	WT	WT	WT	P2277H	WT	WT	WT	WT	WT
coadread_dfci_2016	coadread_dfci_2016_2342	WT	WT	WT	WT	WT	WT	WT	WT	WT	WT	WT	WT	WT	WT	WT	WT	WT	WT	WT	WT	WT	WT	WT	WT	WT	WT	WT	WT	R625C	WT	WT	WT	WT	WT	S243N	WT	WT	WT	WT	WT	WT	WT	WT	WT	WT	WT	WT	WT
coadread_dfci_2016	coadread_dfci_2016_3088	WT	WT	WT	WT	WT	WT	WT	WT	WT	WT	WT	WT	WT	WT	WT	WT	WT	WT	WT	WT	WT	WT	WT	A97V	WT	WT	R394L	WT	D798N	WT	WT	WT	WT	WT	WT	WT	WT	WT	WT	WT	WT	WT	WT	WT	WT	WT	WT	WT
coadread_dfci_2016	coadread_dfci_2016_292	WT	WT	WT	S1159I	WT	WT	WT	WT	WT	WT	WT	WT	WT	WT	WT	WT	WT	T2644I	WT	R1054C	WT	WT	WT	WT	WT	T1931P	WT	WT	WT	WT	WT	WT	WT	WT	WT	WT	WT	WT	L112V	WT	WT	WT	WT	K916M	WT	WT	WT	WT
coadread_dfci_2016	coadread_dfci_2016_50	WT	WT	WT	WT	WT	WT	WT	WT	WT	WT	I1039=	WT	WT	WT	WT	WT	WT	WT	WT	WT	WT	WT	WT	WT	WT	WT	WT	WT	WT	WT	WT	WT	R145C	WT	WT	WT	WT	WT	WT	WT	WT	WT	WT	WT	WT	WT	WT	WT
coadread_dfci_2016	coadread_dfci_2016_3651	WT	WT	WT	WT	WT	WT	WT	WT	WT	WT	WT	WT	WT	WT	WT	WT	WT	WT	WT	WT	WT	WT	WT	R1496C	WT	WT	WT	WT	E964K	WT	WT	WT	WT	WT	WT	WT	WT	WT	WT	WT	WT	WT	WT	WT	WT	E1019K	WT	WT
coadread_dfci_2016	coadread_dfci_2016_236849	WT	WT	WT	WT	WT	WT	WT	WT	WT	WT	WT	WT	WT	WT	M44I	WT	WT	WT	WT	WT	WT	WT	WT	WT	WT	WT	WT	WT	R1658H	WT	WT	WT	WT	WT	WT	WT	WT	WT	WT	T1438=	WT	WT	WT	WT	WT	WT	WT	WT
coadread_dfci_2016	coadread_dfci_2016_1848	WT	WT	WT	WT	WT	WT	WT	WT	WT	WT	WT	WT	WT	WT	WT	WT	WT	WT	WT	WT	WT	WT	WT	WT	WT	WT	WT	WT	WT	WT	WT	WT	WT	WT	WT	WT	WT	WT	R343H	WT	R1272C	WT	WT	WT	WT	WT	WT	WT
coadread_dfci_2016	coadread_dfci_2016_2220	WT	WT	WT	WT	WT	WT	WT	WT	WT	WT	WT	WT	WT	WT	WT	R742H	WT	WT	WT	WT	WT	WT	WT	WT	WT	WT	WT	WT	WT	WT	WT	WT	WT	WT	WT	A1951T	WT	WT	WT	WT	WT	P620L	WT	R921*	WT	WT	WT	WT
coadread_dfci_2016	coadread_dfci_2016_1206	WT	WT	WT	WT	WT	WT	WT	WT	WT	WT	WT	WT	WT	WT	WT	WT	WT	WT	WT	WT	WT	WT	WT	WT	WT	WT	WT	WT	WT	WT	WT	WT	WT	WT	WT	WT	WT	WT	WT	WT	WT	WT	A1009V	WT	WT	WT	WT	WT
coadread_dfci_2016	coadread_dfci_2016_2992	Q2778E	WT	WT	WT	WT	WT	R1560H	WT	WT	WT	WT	WT	R937Q	WT	WT	WT	WT	WT	R2835H	WT	WT	WT	WT	WT	WT	WT	WT	WT	WT	WT	WT	WT	WT	WT	WT	WT	WT	WT	WT	WT	WT	WT	E1843V	WT	WT	WT	WT	WT
coadread_dfci_2016	coadread_dfci_2016_1745	WT	WT	WT	WT	WT	WT	WT	WT	WT	WT	WT	WT	WT	WT	WT	WT	WT	WT	WT	WT	WT	WT	WT	WT	WT	WT	WT	WT	WT	WT	WT	WT	WT	WT	WT	WT	WT	WT	WT	WT	WT	WT	WT	WT	WT	WT	WT	WT
coadread_dfci_2016	coadread_dfci_2016_3483	WT	WT	WT	WT	WT	WT	WT	WT	WT	WT	WT	WT	WT	WT	WT	WT	WT	WT	WT	C2041F	WT	WT	WT	WT	WT	WT	WT	WT	T338M	WT	WT	WT	WT	WT	WT	WT	WT	WT	WT	WT	WT	WT	WT	WT	WT	R308H	WT	WT
coadread_dfci_2016	coadread_dfci_2016_2963	WT	WT	WT	WT	WT	WT	WT	WT	WT	WT	D2860G	WT	WT	WT	WT	WT	WT	WT	WT	C1425Y	WT	WT	WT	WT	WT	WT	WT	WT	WT	WT	WT	WT	WT	WT	WT	WT	WT	WT	WT	WT	WT	WT	G557D	WT	WT	WT	WT	WT
coadread_dfci_2016	coadread_dfci_2016_688	WT	WT	WT	WT	WT	WT	WT	WT	WT	WT	WT	WT	R529W	WT	WT	WT	WT	WT	WT	WT	WT	WT	WT	WT	WT	WT	WT	WT	WT	WT	WT	WT	WT	WT	WT	WT	WT	WT	WT	WT	WT	WT	WT	WT	WT	WT	WT	WT
coadread_dfci_2016	coadread_dfci_2016_3029	WT	WT	WT	WT	WT	WT	WT	WT	WT	WT	WT	WT	WT	WT	WT	WT	WT	WT	WT	WT	WT	WT	WT	WT	WT	WT	WT	WT	WT	WT	WT	WT	WT	WT	WT	WT	WT	WT	WT	WT	WT	WT	WT	WT	WT	WT	WT	WT
coadread_dfci_2016	coadread_dfci_2016_3010	WT	R946Q	WT	WT	WT	WT	WT	WT	WT	WT	WT	WT	WT	WT	WT	WT	WT	G603S	WT	WT	WT	WT	T14S	WT	WT	WT	WT	WT	WT	WT	WT	WT	WT	R777H	WT	WT	WT	WT	WT	WT	WT	WT	WT	WT	WT	WT	WT	WT
coadread_dfci_2016	coadread_dfci_2016_93	WT	WT	WT	WT	WT	WT	WT	WT	WT	D1099N	WT	WT	WT	WT	WT	WT	WT	WT	E1101K	WT	WT	WT	WT	WT	WT	WT	WT	WT	WT	WT	WT	WT	WT	WT	WT	WT	WT	WT	WT	WT	WT	WT	WT	WT	WT	WT	WT	WT
coadread_dfci_2016	coadread_dfci_2016_3421	WT	WT	G42=	WT	WT	WT	WT	WT	WT	T1320M	WT	WT	WT	WT	WT	WT	WT	WT	WT	L491M	WT	WT	WT	WT	WT	WT	WT	WT	WT	WT	WT	WT	WT	WT	WT	WT	WT	WT	WT	WT	WT	WT	WT	WT	WT	WT	WT	WT
coadread_dfci_2016	coadread_dfci_2016_3534	WT	WT	WT	WT	WT	V3688M	P1602Q	WT	WT	WT	WT	WT	WT	WT	WT	F278V	WT	WT	WT	WT	WT	WT	WT	WT	WT	WT	WT	WT	WT	WT	R2133H	WT	S852R	WT	WT	WT	WT	WT	WT	WT	WT	P1908S	WT	WT	WT	WT	WT	WT
coadread_dfci_2016	coadread_dfci_2016_256	WT	WT	WT	WT	L1090Pfs*37	WT	WT	WT	WT	WT	D1738E	WT	WT	WT	WT	WT	WT	WT	WT	WT	WT	WT	WT	T1561M	WT	WT	WT	WT	WT	WT	WT	WT	WT	WT	WT	WT	WT	WT	WT	WT	WT	WT	WT	WT	WT	WT	WT	WT
coadread_dfci_2016	coadread_dfci_2016_1236	WT	WT	WT	WT	WT	WT	WT	WT	WT	WT	R1774W	WT	WT	WT	WT	WT	WT	WT	WT	WT	WT	WT	WT	WT	WT	WT	WT	WT	WT	WT	WT	WT	V34I	WT	WT	WT	WT	WT	WT	WT	WT	WT	WT	T1198M	WT	WT	WT	WT
coadread_dfci_2016	coadread_dfci_2016_1244	WT	WT	WT	T521M	WT	WT	WT	WT	WT	WT	WT	WT	WT	WT	WT	WT	WT	WT	WT	WT	WT	WT	WT	WT	WT	A1084D	WT	WT	WT	WT	WT	WT	WT	WT	WT	WT	WT	WT	WT	WT	WT	WT	WT	WT	WT	WT	WT	WT
coadread_dfci_2016	coadread_dfci_2016_1804	WT	WT	WT	WT	WT	WT	Q305L	WT	WT	WT	WT	WT	WT	WT	WT	WT	S1310L	WT	WT	WT	WT	WT	WT	WT	WT	WT	WT	WT	WT	WT	WT	WT	WT	WT	WT	WT	WT	WT	WT	WT	WT	WT	WT	WT	WT	WT	WT	WT
coadread_dfci_2016	coadread_dfci_2016_195	WT	WT	WT	WT	WT	WT	WT	WT	WT	WT	WT	WT	WT	WT	WT	WT	WT	WT	WT	WT	WT	WT	WT	WT	R3453*	WT	R264Q	WT	WT	WT	WT	WT	WT	WT	Y2325N	WT	WT	WT	WT	WT	WT	WT	WT	WT	WT	WT	G1587R	WT
coadread_dfci_2016	coadread_dfci_2016_123	WT	WT	WT	WT	WT	WT	WT	WT	WT	WT	WT	WT	WT	WT	WT	WT	WT	WT	WT	R590Q	WT	WT	WT	WT	WT	WT	WT	WT	WT	WT	WT	WT	WT	R2103Q	WT	WT	WT	WT	WT	WT	WT	WT	WT	WT	WT	WT	WT	WT
coadread_dfci_2016	coadread_dfci_2016_1760	WT	WT	WT	WT	WT	WT	WT	WT	WT	WT	WT	WT	WT	WT	WT	WT	WT	WT	WT	WT	WT	WT	WT	Y809H	WT	WT	WT	WT	WT	WT	WT	WT	WT	WT	WT	WT	WT	WT	WT	WT	WT	WT	WT	WT	L302H	WT	WT	WT
coadread_dfci_2016	coadread_dfci_2016_3019	WT	WT	WT	WT	WT	WT	WT	WT	WT	WT	WT	WT	WT	WT	WT	WT	S4375L	WT	WT	WT	WT	WT	R4214W	WT	WT	WT	WT	WT	WT	WT	WT	R2356H	WT	WT	WT	WT	WT	WT	WT	WT	WT	WT	WT	WT	*1238Yext*26	WT	WT	WT
coadread_dfci_2016	coadread_dfci_2016_662	WT	WT	WT	WT	WT	WT	WT	WT	WT	WT	WT	WT	D2713N	WT	WT	WT	WT	WT	WT	WT	WT	WT	WT	WT	WT	WT	WT	WT	WT	WT	WT	WT	WT	WT	WT	WT	WT	WT	G359V	WT	WT	WT	WT	WT	WT	WT	WT	WT
coadread_dfci_2016	coadread_dfci_2016_3481	WT	WT	WT	WT	WT	WT	WT	WT	WT	K97=	WT	WT	WT	WT	WT	WT	WT	WT	WT	F2686S	WT	WT	WT	WT	WT	WT	WT	WT	WT	D79Y	WT	WT	WT	WT	WT	WT	WT	WT	WT	WT	WT	WT	WT	R981M	WT	WT	WT	WT
coadread_dfci_2016	coadread_dfci_2016_251	WT	WT	WT	WT	WT	WT	WT	WT	WT	WT	WT	WT	P2128L R1507W	WT	WT	WT	WT	WT	WT	WT	R3198H	WT	WT	WT	R32H	R754* G2281V	R394C	WT	WT	WT	WT	WT	WT	R666H	R1428W	WT	WT	WT	WT	WT	WT	WT	WT	WT	WT	WT	WT	WT
coadread_dfci_2016	coadread_dfci_2016_3621	WT	WT	WT	WT	R2002C	WT	WT	WT	WT	WT	WT	WT	WT	WT	WT	WT	WT	WT	WT	WT	WT	WT	WT	WT	WT	WT	WT	WT	WT	WT	WT	WT	WT	WT	V2527M R898H	WT	WT	WT	WT	WT	WT	WT	S215F	WT	WT	WT	WT	WT
coadread_dfci_2016	coadread_dfci_2016_419	WT	WT	WT	WT	WT	WT	WT	WT	WT	WT	WT	WT	WT	WT	WT	WT	WT	WT	WT	WT	WT	WT	WT	WT	WT	WT	WT	WT	WT	WT	WT	WT	WT	WT	WT	WT	WT	WT	WT	WT	WT	WT	WT	WT	WT	WT	WT	WT
coadread_dfci_2016	coadread_dfci_2016_3330	WT	WT	R4904C	WT	WT	WT	WT	WT	WT	WT	WT	WT	WT	WT	WT	WT	WT	WT	WT	WT	WT	WT	WT	WT	WT	WT	WT	WT	I1045Mfs*57	WT	WT	WT	WT	WT	WT	WT	WT	WT	WT	WT	WT	WT	WT	WT	WT	WT	A1687V	WT
coadread_dfci_2016	coadread_dfci_2016_676	WT	R804Q	G3911E	WT	WT	WT	WT	WT	WT	WT	WT	WT	WT	WT	WT	WT	WT	WT	WT	WT	WT	WT	WT	WT	E1353K E2279D	WT	WT	R2576C	WT	WT	WT	WT	WT	WT	WT	WT	WT	WT	WT	WT	WT	WT	WT	WT	WT	WT	WT	WT
coadread_tcga	TCGA-AA-A00R-01	WT	R1284* R477W	WT	WT	WT	WT	WT	WT	WT	WT	WT	WT	WT	WT	WT	WT	WT	WT	WT	WT	WT	WT	WT	WT	WT	WT	WT	WT	WT	WT	WT	WT	WT	WT	WT	WT	WT	A504V	WT	WT	WT	WT	WT	WT	WT	WT	WT	WT
coadread_dfci_2016	coadread_dfci_2016_2759	WT	WT	WT	WT	WT	WT	WT	WT	WT	WT	WT	WT	WT	WT	WT	WT	WT	R1390W	WT	WT	WT	WT	WT	WT	WT	WT	WT	WT	WT	WT	WT	WT	WT	R245Q	WT	WT	WT	WT	WT	WT	WT	WT	WT	WT	WT	WT	S2177L	WT
coadread_dfci_2016	coadread_dfci_2016_2966	WT	WT	WT	WT	WT	WT	WT	WT	WT	WT	WT	WT	D1018Y	WT	WT	WT	R2021C	WT	WT	WT	WT	WT	WT	WT	WT	WT	WT	WT	WT	WT	WT	WT	WT	WT	WT	WT	WT	T964K	WT	WT	WT	WT	WT	WT	WT	WT	WT	WT
coadread_dfci_2016	coadread_dfci_2016_463	WT	WT	WT	WT	WT	WT	WT	WT	WT	WT	P69S	WT	WT	WT	WT	WT	WT	WT	P466A	WT	WT	D1866N	WT	D753N	WT	WT	WT	WT	R1010C	WT	WT	WT	WT	WT	WT	WT	WT	WT	WT	WT	WT	WT	G2022S	WT	WT	WT	WT	WT
coadread_dfci_2016	coadread_dfci_2016_2808	WT	WT	WT	WT	WT	WT	WT	WT	WT	WT	T3303M	WT	WT	WT	WT	WT	WT	G1214V	WT	WT	WT	WT	H2276N	WT	V2065I	WT	WT	WT	WT	WT	WT	V2411I	WT	WT	WT	WT	WT	WT	WT	WT	WT	WT	WT	WT	WT	WT	WT	WT
coadread_dfci_2016	coadread_dfci_2016_255	X894_splice	WT	WT	WT	WT	WT	WT	WT	WT	WT	WT	WT	R1375Q	WT	WT	WT	WT	WT	WT	WT	WT	WT	WT	S446Y	WT	WT	WT	WT	WT	WT	WT	WT	WT	V1410I	WT	WT	WT	WT	WT	WT	WT	WT	A2366S	WT	WT	WT	WT	WT
coadread_dfci_2016	coadread_dfci_2016_3049	WT	WT	WT	WT	W146R	WT	WT	WT	WT	WT	WT	WT	WT	WT	WT	WT	WT	WT	WT	WT	WT	WT	WT	WT	WT	WT	WT	WT	WT	WT	WT	WT	WT	WT	WT	WT	WT	WT	WT	WT	WT	WT	WT	WT	WT	WT	WT	WT
coadread_dfci_2016	coadread_dfci_2016_291403	WT	WT	WT	WT	WT	WT	WT	WT	WT	WT	WT	WT	WT	WT	WT	WT	WT	WT	WT	WT	WT	WT	WT	WT	WT	WT	R1064Q	WT	WT	WT	WT	WT	WT	WT	WT	WT	WT	WT	WT	WT	WT	WT	WT	WT	WT	WT	WT	WT
coadread_dfci_2016	coadread_dfci_2016_3045	WT	WT	WT	WT	WT	WT	P1436L	WT	WT	WT	WT	WT	R1234W	WT	WT	WT	T2517M	WT	WT	WT	WT	R227H R230C S524N	WT	WT	WT	WT	R572*	WT	G341R	WT	WT	WT	WT	WT	WT	WT	A702V	WT	S279Y	WT	D605N	WT	WT	WT	WT	R2235Q	WT	WT
coadread_dfci_2016	coadread_dfci_2016_437	WT	WT	WT	WT	WT	WT	WT	WT	WT	WT	E2851*	WT	WT	WT	WT	WT	WT	WT	WT	WT	WT	S2587F	WT	WT	WT	WT	WT	WT	WT	WT	WT	WT	WT	WT	WT	WT	WT	WT	WT	R543C	WT	WT	WT	WT	WT	WT	WT	WT
coadread_dfci_2016	coadread_dfci_2016_2768	WT	WT	WT	WT	R1007Q	A4443T	WT	WT	WT	WT	WT	WT	WT	WT	WT	WT	WT	WT	WT	WT	WT	WT	WT	WT	WT	WT	WT	WT	WT	WT	WT	WT	P791L	WT	WT	WT	WT	WT	WT	WT	WT	WT	WT	WT	WT	WT	T2663M	WT
coadread_dfci_2016	coadread_dfci_2016_2261	WT	WT	WT	WT	WT	WT	WT	WT	WT	WT	WT	WT	WT	WT	WT	WT	WT	WT	WT	WT	WT	WT	WT	WT	WT	WT	WT	WT	WT	WT	WT	WT	WT	WT	WT	WT	R1639C	WT	WT	WT	WT	WT	WT	WT	WT	WT	WT	WT
coadread_dfci_2016	coadread_dfci_2016_4491	WT	WT	WT	WT	WT	Q838*	WT	R2102H	WT	WT	WT	WT	WT	T3033M	WT	WT	WT	R3042C	WT	WT	WT	WT	WT	WT	WT	R1399H	WT	WT	WT	WT	WT	WT	WT	WT	E2542K	R1025*	WT	WT	WT	WT	WT	WT	WT	WT	WT	WT	WT	WT
coadread_dfci_2016	coadread_dfci_2016_3632	WT	WT	WT	WT	WT	WT	WT	WT	WT	WT	WT	WT	WT	WT	WT	WT	WT	WT	R2994Q	WT	WT	WT	WT	R1462H	R3002T	WT	WT	WT	WT	WT	WT	WT	WT	WT	R1154Q	WT	WT	WT	P310L L283I	WT	WT	WT	WT	WT	WT	WT	WT	WT
coadread_dfci_2016	coadread_dfci_2016_197908	WT	WT	WT	WT	WT	WT	WT	WT	WT	WT	WT	WT	S1491L	WT	D3073N	WT	WT	WT	WT	WT	WT	WT	WT	WT	WT	WT	WT	WT	WT	WT	WT	WT	WT	WT	WT	WT	WT	WT	WT	WT	WT	WT	WT	WT	WT	WT	WT	WT
coadread_dfci_2016	coadread_dfci_2016_412	WT	WT	WT	WT	WT	WT	WT	WT	WT	WT	WT	WT	WT	WT	WT	WT	WT	WT	WT	WT	WT	WT	WT	WT	WT	WT	WT	WT	E702K	WT	WT	WT	WT	WT	WT	WT	WT	WT	WT	WT	WT	WT	WT	WT	WT	WT	WT	WT
coadread_dfci_2016	coadread_dfci_2016_270033	WT	WT	WT	WT	WT	WT	WT	WT	WT	WT	T4356M	WT	WT	WT	R3148W	WT	WT	WT	WT	WT	WT	WT	WT	WT	WT	D1309V	WT	WT	WT	WT	WT	WT	WT	WT	WT	WT	WT	WT	WT	WT	WT	S846L	WT	WT	WT	WT	WT	WT
coadread_dfci_2016	coadread_dfci_2016_1772	WT	WT	G4083W	WT	WT	WT	WT	WT	WT	WT	WT	WT	WT	WT	WT	WT	WT	WT	WT	WT	WT	WT	WT	WT	WT	WT	WT	WT	WT	K2502*	WT	WT	WT	WT	WT	WT	WT	WT	WT	WT	WT	WT	WT	WT	WT	WT	WT	WT
coadread_dfci_2016	coadread_dfci_2016_343654	WT	WT	WT	WT	WT	WT	WT	WT	WT	WT	WT	WT	WT	WT	WT	WT	WT	WT	WT	WT	WT	WT	WT	WT	WT	WT	WT	WT	WT	WT	WT	WT	WT	WT	WT	WT	WT	WT	WT	WT	WT	WT	WT	WT	WT	WT	WT	WT
coadread_dfci_2016	coadread_dfci_2016_302873	WT	WT	WT	WT	WT	WT	WT	WT	WT	WT	WT	WT	WT	WT	WT	WT	WT	WT	WT	R1054H	WT	WT	WT	WT	WT	WT	X1460_splice E201G	WT	WT	WT	WT	WT	WT	WT	WT	WT	WT	WT	WT	WT	WT	WT	WT	WT	WT	WT	WT	WT
coadread_dfci_2016	coadread_dfci_2016_2417	WT	WT	WT	WT	WT	WT	WT	WT	WT	WT	WT	WT	WT	WT	T1490N	WT	WT	WT	WT	WT	WT	WT	WT	WT	WT	WT	WT	WT	WT	WT	WT	WT	WT	WT	WT	WT	WT	WT	WT	WT	WT	WT	WT	WT	WT	WT	WT	WT
coadread_dfci_2016	coadread_dfci_2016_2441	WT	WT	WT	WT	WT	WT	WT	WT	D6481N	D134Y	D3243N	WT	WT	WT	WT	WT	WT	WT	Q341L	WT	WT	WT	WT	WT	WT	WT	WT	WT	WT	WT	WT	WT	WT	R432Q	WT	WT	WT	WT	WT	WT	WT	WT	WT	WT	WT	WT	WT	WT
coadread_dfci_2016	coadread_dfci_2016_276701	WT	WT	WT	WT	WT	WT	G632S	WT	WT	WT	WT	WT	WT	WT	WT	WT	WT	WT	WT	WT	WT	WT	WT	WT	WT	WT	WT	WT	WT	WT	WT	WT	WT	WT	WT	WT	WT	WT	WT	WT	WT	I242T	E2188D	WT	WT	WT	WT	WT
coadread_dfci_2016	coadread_dfci_2016_3414	WT	WT	T3840M	WT	WT	WT	WT	WT	WT	WT	WT	WT	WT	WT	WT	WT	WT	WT	WT	WT	WT	WT	WT	WT	WT	WT	WT	WT	WT	WT	WT	WT	WT	WT	WT	WT	WT	WT	WT	WT	WT	WT	WT	WT	WT	WT	WT	WT
coadread_dfci_2016	coadread_dfci_2016_3178	WT	WT	WT	WT	WT	WT	WT	WT	WT	WT	WT	WT	WT	WT	WT	WT	WT	WT	WT	WT	WT	WT	WT	WT	T444M	WT	WT	WT	WT	WT	WT	WT	WT	WT	WT	WT	WT	D2414Y	WT	WT	WT	WT	WT	WT	WT	WT	WT	WT
coadread_dfci_2016	coadread_dfci_2016_2214	WT	WT	WT	WT	WT	WT	WT	WT	WT	WT	WT	WT	WT	WT	WT	WT	WT	WT	WT	WT	WT	WT	WT	WT	WT	WT	WT	WT	WT	WT	WT	WT	WT	WT	WT	WT	WT	WT	WT	WT	WT	WT	WT	WT	WT	WT	WT	WT
coadread_dfci_2016	coadread_dfci_2016_2359	WT	WT	WT	WT	WT	WT	A1020T	WT	WT	WT	WT	WT	WT	Q3511R	WT	WT	WT	WT	WT	WT	WT	WT	WT	WT	WT	Y1061*	WT	WT	WT	WT	WT	WT	WT	WT	WT	WT	WT	WT	WT	WT	WT	WT	WT	H76Y	WT	WT	WT	WT
coadread_dfci_2016	coadread_dfci_2016_1845	WT	WT	WT	WT	WT	WT	WT	WT	WT	WT	WT	WT	WT	WT	WT	WT	WT	WT	WT	WT	WT	WT	WT	WT	WT	WT	WT	WT	WT	WT	WT	WT	WT	WT	WT	WT	WT	WT	WT	P3028S	WT	R2476*	WT	WT	WT	WT	WT	WT
coadread_dfci_2016	coadread_dfci_2016_2397	P2423L	WT	WT	A1390T	WT	WT	WT	WT	WT	WT	WT	WT	WT	WT	WT	R365H	WT	WT	WT	WT	WT	WT	WT	WT	A354S	WT	WT	T1870N	WT	R2142C	WT	WT	S1375L	WT	WT	WT	WT	WT	P505S	WT	S2042L	WT	WT	WT	WT	WT	WT	WT
coadread_dfci_2016	coadread_dfci_2016_224049	WT	R774Q	WT	WT	WT	WT	WT	WT	WT	C245F	WT	WT	WT	WT	WT	WT	WT	WT	P430S	WT	WT	WT	WT	WT	WT	WT	WT	WT	WT	WT	WT	WT	T812I	WT	WT	WT	WT	WT	WT	WT	V2404I	WT	WT	WT	R519*	WT	WT	WT
coadread_dfci_2016	coadread_dfci_2016_3351	WT	WT	WT	WT	WT	WT	WT	WT	WT	WT	WT	WT	WT	WT	WT	WT	WT	WT	WT	WT	WT	WT	WT	WT	WT	WT	WT	WT	WT	WT	WT	WT	WT	WT	WT	WT	WT	WT	WT	WT	WT	WT	WT	WT	WT	WT	WT	WT
coadread_dfci_2016	coadread_dfci_2016_2263	WT	WT	WT	WT	WT	WT	S1162F	WT	WT	WT	A1379E	WT	WT	WT	WT	WT	WT	WT	WT	WT	WT	WT	WT	WT	WT	WT	G1365R	WT	WT	WT	WT	WT	WT	WT	WT	WT	WT	WT	WT	WT	WT	WT	WT	WT	L1158I	WT	WT	WT
coadread_dfci_2016	coadread_dfci_2016_3316	WT	WT	WT	WT	WT	WT	WT	WT	WT	WT	WT	WT	WT	WT	WT	WT	WT	WT	WT	WT	WT	A15V	WT	WT	WT	WT	WT	WT	WT	WT	WT	WT	WT	WT	WT	WT	WT	WT	WT	WT	WT	WT	WT	WT	WT	WT	WT	WT
coadread_dfci_2016	coadread_dfci_2016_295702	WT	WT	WT	WT	WT	WT	WT	WT	WT	WT	WT	WT	WT	WT	WT	WT	WT	WT	WT	WT	WT	WT	WT	R709Q	WT	WT	WT	WT	WT	WT	WT	WT	WT	WT	WT	WT	WT	WT	WT	WT	WT	WT	WT	WT	WT	WT	WT	WT
coadread_dfci_2016	coadread_dfci_2016_2370	WT	WT	WT	WT	WT	WT	WT	WT	WT	WT	WT	WT	WT	WT	WT	WT	WT	WT	WT	WT	WT	E1354Q	WT	WT	WT	WT	WT	WT	WT	WT	WT	WT	WT	WT	WT	WT	WT	WT	WT	WT	WT	WT	WT	WT	WT	WT	WT	WT
coadread_dfci_2016	coadread_dfci_2016_311	WT	WT	WT	WT	WT	WT	WT	WT	L492H	WT	WT	WT	WT	WT	WT	WT	WT	WT	E1869Q	WT	WT	WT	WT	WT	WT	WT	WT	WT	WT	WT	WT	WT	WT	WT	WT	WT	WT	WT	WT	WT	WT	WT	WT	WT	WT	WT	WT	WT
coadread_dfci_2016	coadread_dfci_2016_2995	WT	WT	T1916M	WT	WT	WT	WT	WT	WT	WT	WT	WT	WT	WT	WT	WT	WT	WT	WT	WT	WT	WT	WT	WT	WT	WT	WT	WT	WT	WT	WT	WT	WT	WT	WT	WT	WT	WT	WT	WT	WT	WT	WT	R965C	WT	WT	WT	WT
coadread_dfci_2016	coadread_dfci_2016_3105	WT	WT	R619W	WT	WT	WT	WT	WT	WT	WT	WT	WT	WT	WT	WT	WT	WT	WT	WT	WT	WT	WT	WT	WT	WT	WT	WT	WT	WT	WT	WT	WT	WT	WT	WT	WT	WT	WT	WT	WT	WT	WT	Q2111K	WT	WT	WT	WT	WT
coadread_dfci_2016	coadread_dfci_2016_491	WT	WT	WT	WT	WT	WT	WT	WT	WT	WT	WT	WT	WT	WT	WT	WT	WT	WT	WT	WT	WT	WT	WT	WT	WT	WT	WT	WT	WT	WT	WT	G1824S	WT	WT	WT	WT	WT	WT	WT	WT	WT	WT	WT	WT	WT	WT	WT	WT
coadread_dfci_2016	coadread_dfci_2016_280	WT	WT	WT	WT	WT	WT	WT	M3870K	WT	WT	WT	WT	WT	WT	WT	WT	WT	WT	WT	WT	WT	WT	WT	WT	WT	WT	WT	WT	WT	WT	WT	WT	WT	WT	WT	WT	WT	WT	WT	WT	WT	WT	WT	WT	WT	WT	WT	WT
coadread_dfci_2016	coadread_dfci_2016_182584	WT	WT	WT	WT	WT	WT	WT	WT	WT	WT	WT	WT	WT	WT	WT	WT	WT	WT	WT	WT	WT	WT	WT	WT	WT	WT	WT	WT	WT	WT	WT	WT	WT	WT	R56W	WT	WT	WT	WT	WT	WT	WT	WT	WT	WT	V786I	WT	WT
coadread_dfci_2016	coadread_dfci_2016_1251	WT	WT	WT	WT	WT	A2532T	WT	WT	WT	WT	WT	WT	WT	WT	WT	WT	WT	WT	WT	WT	WT	WT	WT	WT	WT	WT	WT	WT	WT	WT	WT	WT	WT	WT	WT	WT	WT	WT	WT	R2188H	WT	WT	WT	WT	WT	WT	WT	WT
coadread_dfci_2016	coadread_dfci_2016_2266	WT	WT	WT	WT	WT	WT	WT	WT	WT	WT	WT	WT	WT	WT	WT	WT	WT	WT	WT	WT	WT	WT	WT	WT	WT	WT	WT	WT	WT	WT	WT	WT	WT	WT	WT	WT	WT	WT	WT	WT	WT	WT	WT	WT	WT	WT	WT	WT
coadread_dfci_2016	coadread_dfci_2016_3116	WT	WT	WT	WT	WT	WT	WT	WT	WT	WT	WT	WT	WT	WT	WT	WT	WT	WT	WT	WT	WT	WT	WT	WT	WT	WT	WT	WT	WT	WT	WT	WT	WT	WT	WT	WT	WT	WT	WT	WT	WT	WT	R152Q	WT	WT	WT	WT	S3401N
coadread_dfci_2016	coadread_dfci_2016_165	WT	WT	WT	WT	WT	WT	WT	WT	WT	WT	WT	WT	WT	WT	WT	WT	WT	WT	WT	WT	WT	WT	WT	WT	WT	A703V	WT	WT	T1374S	L926F V1046I	WT	WT	WT	WT	WT	WT	WT	WT	WT	WT	WT	WT	R145W	WT	WT	WT	WT	WT
coadread_dfci_2016	coadread_dfci_2016_259101	WT	WT	WT	WT	WT	WT	T641P	WT	WT	WT	WT	WT	WT	WT	WT	WT	WT	WT	WT	WT	WT	WT	WT	WT	WT	WT	WT	WT	WT	WT	WT	WT	WT	WT	WT	R1621Q	WT	WT	WT	WT	WT	WT	WT	WT	Y1094C	WT	WT	WT
coadread_dfci_2016	coadread_dfci_2016_492	WT	WT	WT	WT	WT	WT	WT	WT	WT	WT	WT	WT	WT	WT	WT	WT	WT	WT	WT	WT	WT	WT	WT	A316T	WT	WT	F1482S	WT	L314F	WT	WT	V910A	WT	WT	WT	WT	WT	WT	WT	WT	WT	WT	WT	WT	WT	WT	WT	WT
coadread_dfci_2016	coadread_dfci_2016_1747	WT	WT	WT	WT	P1325L	WT	WT	WT	WT	WT	WT	WT	WT	WT	WT	WT	WT	WT	WT	WT	WT	WT	WT	WT	WT	WT	WT	WT	T2M	WT	WT	WT	WT	WT	WT	WT	WT	WT	L232Q	WT	WT	WT	WT	WT	T171K	WT	WT	WT
coadread_dfci_2016	coadread_dfci_2016_2289	WT	WT	WT	WT	WT	WT	WT	WT	WT	WT	WT	I691N	WT	WT	M2543I	WT	WT	WT	WT	G1589W	WT	WT	WT	WT	WT	WT	WT	WT	WT	WT	WT	WT	WT	WT	WT	WT	WT	WT	WT	WT	WT	WT	WT	T1266M	WT	WT	WT	WT
coadread_dfci_2016	coadread_dfci_2016_2406	WT	E906K	WT	WT	T1347M	WT	WT	WT	WT	WT	WT	WT	WT	WT	WT	WT	WT	WT	WT	WT	WT	WT	WT	WT	R3207C	WT	WT	WT	WT	WT	WT	WT	WT	WT	WT	WT	WT	WT	WT	WT	WT	WT	WT	WT	WT	WT	WT	WT
coadread_dfci_2016	coadread_dfci_2016_497	WT	WT	WT	WT	WT	WT	WT	WT	WT	WT	WT	WT	WT	WT	WT	WT	WT	WT	WT	WT	N533D	WT	WT	WT	WT	WT	WT	WT	WT	WT	WT	WT	WT	WT	WT	WT	WT	WT	WT	WT	WT	WT	WT	WT	WT	WT	WT	WT
coadread_tcga	TCGA-AA-3543-01	WT	WT	WT	WT	WT	WT	WT	WT	WT	WT	WT	WT	WT	WT	WT	WT	WT	WT	WT	C1395F	R490H	D1093G	WT	WT	WT	WT	WT	WT	WT	WT	WT	WT	WT	WT	WT	WT	WT	WT	WT	WT	WT	WT	WT	WT	WT	WT	R40Q	WT
coadread_dfci_2016	coadread_dfci_2016_3273	WT	WT	WT	V1244M	WT	WT	WT	WT	WT	WT	WT	WT	WT	WT	WT	R546H	WT	WT	WT	WT	WT	WT	WT	R1477C E950K	WT	WT	WT	WT	WT	WT	WT	WT	WT	WT	WT	WT	WT	WT	WT	WT	WT	WT	WT	WT	WT	WT	WT	WT
coadread_dfci_2016	coadread_dfci_2016_1240	WT	WT	WT	WT	WT	WT	WT	WT	WT	WT	WT	WT	WT	WT	WT	WT	WT	WT	WT	WT	WT	WT	WT	WT	WT	WT	WT	WT	WT	WT	WT	WT	WT	WT	WT	WT	WT	WT	WT	WT	WT	WT	WT	WT	WT	WT	R1802W	WT
coadread_dfci_2016	coadread_dfci_2016_2388	WT	WT	WT	WT	G3037A	WT	WT	WT	WT	WT	WT	WT	WT	WT	R1378C	WT	WT	WT	WT	WT	WT	WT	WT	WT	WT	WT	WT	WT	WT	WT	WT	WT	WT	WT	WT	WT	WT	WT	WT	WT	WT	WT	WT	WT	WT	WT	P1239L	WT
coadread_dfci_2016	coadread_dfci_2016_3508	WT	WT	WT	WT	WT	WT	WT	WT	WT	WT	WT	WT	WT	WT	WT	WT	WT	WT	WT	WT	WT	WT	WT	D1444N	WT	WT	WT	WT	WT	WT	WT	WT	WT	WT	WT	WT	R773C	WT	WT	WT	WT	WT	WT	WT	P907S	WT	WT	WT
coadread_dfci_2016	coadread_dfci_2016_1742	WT	WT	WT	WT	WT	WT	WT	WT	WT	WT	E3239K	WT	WT	WT	WT	WT	WT	WT	WT	WT	WT	WT	WT	WT	R274C	WT	WT	WT	WT	WT	WT	WT	WT	WT	WT	WT	WT	WT	WT	WT	R580W	WT	WT	WT	WT	WT	WT	WT
coadread_dfci_2016	coadread_dfci_2016_196972	WT	WT	WT	WT	WT	WT	WT	WT	WT	WT	WT	WT	WT	WT	WT	WT	L949*	R126C Q2615*	WT	WT	WT	WT	WT	WT	WT	WT	WT	WT	WT	WT	WT	WT	WT	WT	WT	WT	WT	WT	WT	WT	S617L	X996_splice	WT	WT	WT	WT	WT	WT
coadread_dfci_2016	coadread_dfci_2016_471	WT	WT	WT	WT	WT	WT	WT	WT	WT	WT	WT	WT	WT	WT	WT	WT	WT	WT	WT	WT	WT	WT	WT	WT	WT	WT	WT	WT	WT	WT	WT	WT	WT	WT	WT	WT	WT	WT	WT	WT	WT	WT	WT	WT	WT	WT	WT	D4350N
coadread_dfci_2016	coadread_dfci_2016_621	WT	WT	WT	WT	WT	WT	WT	WT	WT	WT	WT	WT	WT	WT	WT	WT	WT	WT	E3467K	WT	WT	WT	WT	WT	WT	WT	WT	WT	WT	WT	WT	WT	WT	WT	WT	WT	WT	WT	WT	WT	WT	WT	WT	WT	WT	WT	WT	WT
coadread_dfci_2016	coadread_dfci_2016_229707	WT	WT	WT	WT	WT	WT	WT	WT	WT	WT	WT	WT	WT	R1833Q	WT	WT	WT	WT	WT	WT	WT	WT	WT	WT	WT	WT	WT	WT	WT	WT	WT	WT	WT	WT	WT	WT	WT	WT	WT	WT	WT	WT	WT	WT	WT	WT	WT	WT
coadread_dfci_2016	coadread_dfci_2016_24	WT	WT	WT	WT	WT	WT	WT	WT	WT	WT	WT	WT	WT	WT	WT	WT	WT	WT	WT	WT	WT	WT	WT	WT	WT	WT	WT	WT	WT	WT	WT	WT	WT	R496W G1430D	WT	R73H	WT	WT	WT	WT	WT	WT	WT	WT	WT	WT	WT	WT
coadread_dfci_2016	coadread_dfci_2016_3502	WT	WT	WT	WT	WT	WT	WT	WT	WT	WT	A3289S	WT	WT	WT	WT	WT	WT	WT	R930C	WT	WT	WT	WT	WT	WT	WT	WT	WT	WT	WT	WT	WT	V1199I	WT	WT	WT	WT	WT	WT	WT	WT	WT	WT	WT	WT	WT	WT	WT
coadread_dfci_2016	coadread_dfci_2016_1221	WT	WT	WT	WT	WT	WT	WT	WT	E5491*	WT	WT	WT	R236Q	WT	WT	G1123V	WT	WT	WT	WT	WT	WT	WT	WT	WT	P2752S	WT	WT	WT	WT	WT	WT	WT	WT	WT	WT	WT	WT	WT	WT	WT	WT	WT	WT	WT	WT	WT	WT
coadread_dfci_2016	coadread_dfci_2016_694	WT	WT	WT	WT	WT	WT	WT	WT	WT	WT	WT	WT	WT	WT	WT	WT	WT	WT	WT	WT	WT	WT	WT	WT	WT	WT	WT	WT	WT	WT	WT	WT	WT	WT	WT	WT	WT	WT	WT	WT	WT	WT	WT	WT	WT	WT	WT	WT
coadread_dfci_2016	coadread_dfci_2016_3714	WT	WT	WT	WT	WT	WT	WT	WT	WT	WT	WT	R2781H	WT	K161E	WT	WT	WT	A2726V	WT	WT	WT	WT	WT	WT	WT	R1054*	WT	WT	WT	WT	WT	WT	WT	WT	WT	WT	R880W	WT	WT	WT	L1656I	WT	WT	WT	WT	WT	WT	WT
coadread_dfci_2016	coadread_dfci_2016_3187	WT	WT	WT	WT	WT	WT	WT	WT	WT	WT	WT	WT	WT	WT	WT	WT	WT	WT	WT	WT	WT	WT	WT	WT	WT	WT	WT	R772Q	WT	WT	WT	WT	N1221K	WT	WT	WT	WT	WT	WT	WT	WT	WT	S26L	WT	WT	WT	WT	WT
coadread_dfci_2016	coadread_dfci_2016_3539	WT	WT	WT	WT	WT	WT	WT	WT	R3818M	WT	WT	WT	WT	WT	WT	WT	WT	WT	I690T	WT	WT	WT	WT	WT	R2955C	WT	WT	WT	WT	WT	WT	WT	WT	WT	D2154N S243N	P423L	WT	WT	WT	WT	R1357W	WT	WT	WT	WT	WT	WT	WT
coadread_dfci_2016	coadread_dfci_2016_3194	WT	WT	WT	W128*	WT	WT	WT	WT	WT	R1275*	WT	WT	WT	WT	WT	WT	WT	WT	WT	WT	WT	WT	WT	WT	WT	WT	WT	WT	WT	WT	WT	WT	R874C	WT	WT	WT	WT	WT	WT	V2363M	WT	WT	WT	WT	WT	WT	WT	WT
coadread_dfci_2016	coadread_dfci_2016_270588	WT	WT	WT	WT	WT	WT	WT	WT	WT	WT	WT	S3140G	WT	WT	WT	WT	WT	WT	WT	WT	WT	WT	WT	WT	WT	WT	WT	WT	WT	WT	WT	WT	WT	WT	WT	WT	WT	WT	WT	WT	WT	WT	WT	WT	I40T	WT	WT	WT
coadread_dfci_2016	coadread_dfci_2016_73	WT	WT	A5130S	R1068*	WT	WT	WT	WT	WT	WT	WT	WT	WT	WT	WT	WT	WT	WT	WT	WT	WT	WT	WT	WT	WT	WT	WT	WT	R729H	WT	WT	WT	WT	WT	WT	WT	V769M	WT	WT	WT	WT	WT	WT	WT	WT	WT	WT	WT
coadread_dfci_2016	coadread_dfci_2016_3709	WT	WT	WT	WT	WT	WT	WT	WT	WT	WT	WT	WT	WT	WT	WT	WT	WT	WT	WT	WT	WT	WT	WT	WT	WT	WT	WT	WT	WT	WT	WT	WT	WT	WT	A2602T	WT	WT	S2330Y	WT	WT	WT	WT	WT	WT	WT	WT	WT	WT
coadread_dfci_2016	coadread_dfci_2016_2416	WT	WT	P3525L	WT	WT	WT	WT	WT	WT	WT	WT	WT	WT	WT	WT	WT	WT	WT	WT	WT	WT	WT	WT	WT	WT	WT	WT	WT	R1417M	WT	WT	WT	WT	WT	WT	WT	V2114I	WT	WT	WT	WT	WT	WT	WT	V834I	WT	WT	WT
coadread_dfci_2016	coadread_dfci_2016_3104	WT	WT	WT	WT	WT	WT	WT	T2030I	WT	WT	WT	WT	WT	WT	WT	WT	WT	WT	WT	WT	WT	WT	WT	R1504C	WT	G2987V	WT	WT	WT	WT	WT	WT	WT	WT	WT	WT	WT	WT	WT	WT	WT	WT	WT	WT	WT	WT	WT	WT
coadread_dfci_2016	coadread_dfci_2016_2984	WT	WT	WT	WT	WT	WT	WT	WT	WT	WT	WT	WT	W1478*	WT	WT	WT	WT	WT	V3232I	WT	WT	WT	WT	WT	WT	WT	WT	WT	WT	WT	WT	V2882M	WT	WT	WT	WT	WT	WT	WT	WT	WT	WT	WT	WT	WT	WT	WT	WT
coadread_dfci_2016	coadread_dfci_2016_3542	WT	A1441T	WT	WT	WT	WT	WT	WT	L2025F	WT	R1942C	WT	WT	WT	WT	WT	WT	WT	WT	WT	WT	WT	WT	WT	WT	WT	WT	WT	WT	WT	WT	WT	T955M R1010W	WT	WT	WT	WT	WT	WT	WT	WT	WT	WT	WT	WT	R331*	WT	WT
coadread_dfci_2016	coadread_dfci_2016_4505	WT	WT	P3154L	WT	WT	WT	WT	WT	WT	WT	WT	WT	WT	WT	WT	WT	WT	WT	WT	WT	WT	WT	WT	WT	WT	WT	WT	WT	WT	WT	WT	WT	WT	WT	WT	WT	WT	WT	WT	WT	WT	WT	WT	WT	WT	WT	WT	WT
coadread_dfci_2016	coadread_dfci_2016_2974	WT	WT	WT	WT	WT	WT	WT	WT	WT	WT	WT	WT	WT	WT	WT	WT	WT	WT	WT	WT	WT	WT	WT	WT	WT	WT	WT	WT	R520W	WT	WT	WT	WT	WT	WT	WT	WT	WT	WT	WT	WT	WT	WT	WT	WT	Q20K	WT	WT
coadread_dfci_2016	coadread_dfci_2016_647	WT	R869Q	WT	WT	WT	WT	WT	WT	WT	WT	WT	WT	WT	T4026M	R2030Q	WT	WT	WT	WT	WT	WT	WT	WT	WT	WT	WT	WT	WT	WT	WT	WT	WT	WT	WT	WT	WT	WT	WT	A594V	WT	WT	WT	WT	WT	WT	WT	WT	R298C
coadread_dfci_2016	coadread_dfci_2016_1844	WT	WT	WT	WT	WT	WT	WT	WT	WT	WT	WT	WT	WT	WT	WT	S341L	WT	T349I	WT	WT	R854C	WT	WT	WT	WT	WT	WT	WT	WT	WT	WT	WT	WT	WT	WT	WT	WT	WT	WT	WT	WT	R1162*	WT	WT	WT	WT	WT	WT
coadread_dfci_2016	coadread_dfci_2016_103320	WT	WT	WT	WT	WT	WT	WT	WT	WT	WT	WT	WT	WT	WT	WT	WT	WT	WT	WT	WT	WT	WT	WT	WT	WT	WT	WT	WT	WT	WT	WT	WT	WT	WT	WT	WT	WT	WT	WT	A770T	WT	WT	WT	WT	WT	WT	WT	WT
coadread_dfci_2016	coadread_dfci_2016_328	WT	WT	WT	WT	WT	WT	WT	WT	WT	WT	WT	G1415R	WT	A3414T	WT	WT	WT	WT	WT	WT	WT	WT	S2603C	A730T T1446M	V826I	WT	WT	WT	WT	R2238W	WT	WT	WT	WT	WT	WT	WT	WT	WT	WT	WT	WT	WT	WT	WT	WT	WT	WT
coadread_dfci_2016	coadread_dfci_2016_3255	WT	WT	WT	WT	WT	WT	WT	WT	WT	WT	WT	WT	WT	WT	WT	WT	WT	WT	WT	WT	WT	WT	WT	WT	WT	WT	WT	WT	WT	WT	WT	WT	WT	WT	WT	WT	WT	WT	WT	WT	WT	WT	WT	WT	Q1152K	WT	WT	WT
coadread_dfci_2016	coadread_dfci_2016_359705	WT	WT	WT	WT	WT	WT	WT	WT	WT	WT	WT	WT	WT	WT	WT	WT	A3544V	WT	WT	WT	WT	WT	WT	WT	WT	WT	WT	WT	WT	WT	WT	WT	WT	WT	WT	WT	WT	WT	WT	WT	WT	WT	WT	WT	WT	WT	WT	WT
coadread_dfci_2016	coadread_dfci_2016_3112	WT	WT	WT	WT	WT	WT	WT	WT	WT	WT	WT	WT	WT	WT	WT	WT	WT	WT	WT	WT	WT	WT	WT	WT	WT	WT	WT	WT	WT	WT	WT	WT	WT	WT	WT	WT	WT	WT	WT	WT	WT	WT	WT	WT	WT	WT	WT	WT
coadread_dfci_2016	coadread_dfci_2016_2413	WT	WT	P1901L	WT	WT	WT	WT	WT	WT	WT	WT	WT	WT	WT	WT	WT	WT	WT	WT	WT	WT	WT	WT	WT	WT	WT	WT	WT	WT	WT	WT	WT	WT	WT	WT	WT	WT	D1369N	WT	WT	WT	WT	WT	WT	WT	WT	WT	WT
coadread_dfci_2016	coadread_dfci_2016_2763	WT	WT	P4643L	WT	WT	WT	WT	WT	WT	WT	WT	WT	WT	N2998H	WT	WT	WT	WT	D3458N	WT	WT	WT	WT	WT	WT	WT	WT	WT	WT	WT	WT	H292N	WT	WT	WT	WT	WT	WT	WT	WT	G603R	WT	WT	WT	WT	WT	WT	WT
coadread_dfci_2016	coadread_dfci_2016_3645	WT	WT	WT	WT	WT	T3566K	WT	WT	WT	WT	WT	WT	WT	WT	WT	WT	WT	WT	WT	WT	WT	WT	WT	WT	WT	WT	WT	WT	WT	WT	WT	WT	WT	WT	WT	WT	WT	WT	WT	WT	WT	WT	WT	WT	WT	WT	WT	WT
coadread_dfci_2016	coadread_dfci_2016_2304	WT	WT	WT	WT	WT	WT	WT	WT	WT	WT	WT	WT	WT	WT	WT	WT	WT	WT	WT	WT	WT	WT	WT	WT	WT	WT	WT	WT	WT	WT	WT	WT	WT	WT	WT	WT	WT	WT	WT	WT	WT	WT	WT	WT	WT	WT	D1215Y	WT
coadread_dfci_2016	coadread_dfci_2016_2400	WT	WT	WT	WT	R2771Q	WT	WT	WT	WT	WT	WT	WT	WT	WT	WT	WT	WT	WT	WT	WT	WT	WT	WT	WT	WT	WT	WT	WT	WT	WT	WT	WT	WT	WT	WT	WT	WT	WT	WT	WT	WT	WT	V1405I	WT	WT	WT	WT	WT
coadread_dfci_2016	coadread_dfci_2016_693	WT	WT	WT	WT	WT	WT	WT	WT	WT	WT	WT	WT	WT	WT	WT	WT	WT	WT	WT	WT	WT	WT	WT	WT	WT	WT	WT	WT	WT	WT	WT	WT	WT	WT	WT	WT	WT	WT	WT	WT	WT	WT	WT	WT	WT	WT	S2308L	WT
coadread_dfci_2016	coadread_dfci_2016_418	WT	WT	WT	R1068*	WT	WT	WT	WT	WT	WT	WT	WT	WT	WT	WT	WT	WT	WT	WT	WT	WT	WT	WT	WT	WT	WT	WT	WT	WT	WT	WT	WT	WT	R2039C	WT	WT	WT	WT	WT	WT	WT	WT	WT	WT	WT	WT	WT	WT
coadread_dfci_2016	coadread_dfci_2016_4534	WT	WT	WT	WT	WT	WT	WT	WT	E3324K	WT	WT	WT	WT	WT	WT	WT	WT	WT	WT	WT	WT	WT	R3539H	WT	WT	WT	R512Q	WT	WT	WT	WT	WT	WT	WT	R2648C	D775Y	WT	WT	WT	WT	WT	WT	WT	WT	WT	WT	WT	WT
coadread_dfci_2016	coadread_dfci_2016_3022	WT	WT	WT	WT	WT	A3423G	WT	WT	WT	WT	WT	WT	WT	WT	WT	WT	WT	WT	T1325I	WT	WT	WT	WT	WT	WT	WT	WT	WT	WT	WT	WT	WT	WT	R2119C	WT	WT	WT	WT	WT	WT	WT	WT	WT	WT	WT	WT	WT	WT
coadread_dfci_2016	coadread_dfci_2016_1187	WT	WT	WT	WT	WT	WT	WT	WT	WT	WT	WT	WT	WT	WT	WT	WT	WT	WT	WT	WT	WT	WT	WT	WT	WT	WT	WT	WT	WT	WT	WT	WT	WT	WT	WT	WT	WT	WT	WT	WT	WT	WT	WT	WT	WT	WT	WT	WT
coadread_dfci_2016	coadread_dfci_2016_46	WT	WT	WT	WT	WT	WT	WT	WT	WT	WT	WT	WT	WT	WT	WT	WT	WT	WT	WT	WT	WT	WT	WT	WT	WT	WT	WT	WT	WT	WT	WT	WT	WT	WT	WT	D1661N	WT	WT	WT	WT	WT	WT	WT	WT	WT	WT	WT	WT
coadread_dfci_2016	coadread_dfci_2016_4529	WT	WT	WT	WT	WT	WT	WT	WT	WT	WT	WT	WT	WT	D608G	WT	WT	WT	WT	WT	WT	WT	WT	WT	WT	WT	WT	WT	WT	WT	WT	WT	WT	WT	WT	WT	WT	WT	WT	WT	WT	WT	WT	WT	WT	WT	WT	WT	WT
coadread_dfci_2016	coadread_dfci_2016_2389	WT	WT	WT	WT	WT	WT	WT	WT	WT	WT	WT	WT	WT	WT	WT	WT	WT	WT	WT	WT	WT	WT	WT	WT	WT	WT	WT	WT	WT	WT	WT	WT	WT	WT	WT	WT	WT	WT	WT	WT	WT	WT	WT	WT	WT	WT	WT	WT
coadread_dfci_2016	coadread_dfci_2016_374	WT	WT	WT	WT	WT	WT	WT	WT	WT	WT	WT	WT	C482Y	WT	WT	WT	WT	WT	WT	WT	WT	WT	WT	WT	WT	WT	WT	WT	WT	R929H	WT	WT	WT	WT	WT	WT	WT	WT	WT	WT	WT	WT	WT	WT	WT	WT	WT	WT
coadread_dfci_2016	coadread_dfci_2016_360138	WT	WT	WT	WT	WT	WT	WT	WT	WT	WT	WT	WT	WT	WT	WT	WT	WT	WT	WT	R2846H	WT	WT	WT	R1477H	WT	WT	M510I	WT	WT	R1514C	WT	WT	WT	WT	WT	WT	WT	WT	WT	WT	WT	WT	WT	WT	WT	WT	WT	WT
coadread_dfci_2016	coadread_dfci_2016_1161	WT	WT	WT	WT	WT	WT	WT	WT	WT	WT	WT	WT	WT	WT	WT	WT	WT	WT	WT	WT	WT	WT	WT	WT	WT	WT	WT	WT	WT	WT	WT	WT	WT	WT	WT	WT	WT	WT	WT	WT	WT	WT	WT	L762M	WT	WT	T3150I	WT
coadread_dfci_2016	coadread_dfci_2016_3549	WT	WT	WT	WT	WT	WT	WT	WT	WT	R372C	WT	WT	WT	WT	WT	WT	WT	WT	WT	WT	WT	WT	WT	WT	WT	WT	WT	WT	R79C	WT	WT	WT	WT	WT	WT	WT	WT	WT	WT	WT	WT	WT	WT	WT	WT	WT	WT	WT
coadread_dfci_2016	coadread_dfci_2016_224	WT	WT	WT	WT	WT	WT	WT	WT	WT	WT	WT	WT	WT	WT	WT	WT	WT	WT	WT	A2265V	WT	WT	WT	WT	WT	WT	WT	WT	WT	WT	A1979T	WT	WT	WT	WT	WT	WT	F737Sfs*4	WT	WT	E158Q	WT	WT	WT	WT	WT	WT	WT
coadread_dfci_2016	coadread_dfci_2016_2369	WT	R656H	WT	WT	WT	WT	WT	WT	WT	WT	V2746I	WT	WT	WT	WT	WT	D1554N	WT	WT	WT	WT	WT	WT	WT	WT	WT	WT	L2091F	WT	WT	S800N	WT	WT	WT	WT	WT	WT	WT	WT	WT	WT	WT	WT	WT	WT	WT	WT	E146K
coadread_dfci_2016	coadread_dfci_2016_3523	R3801H	WT	S4633R	WT	WT	L278V	WT	WT	WT	WT	WT	WT	WT	WT	WT	K1027*	WT	WT	WT	WT	WT	WT	WT	WT	WT	WT	R1590K	WT	R449C	WT	WT	WT	WT	WT	WT	WT	WT	A1371T T2767K	WT	WT	WT	WT	WT	WT	WT	WT	WT	WT
coadread_dfci_2016	coadread_dfci_2016_4508	WT	WT	WT	WT	WT	WT	WT	WT	WT	WT	WT	WT	WT	WT	WT	R761Q	WT	WT	WT	WT	WT	WT	WT	WT	I252=	T1001N	WT	WT	WT	WT	WT	WT	S1062L	WT	WT	WT	WT	WT	WT	WT	WT	WT	WT	WT	WT	WT	WT	WT
coadread_dfci_2016	coadread_dfci_2016_142275	WT	WT	WT	WT	WT	WT	WT	WT	WT	WT	WT	WT	WT	WT	WT	WT	WT	WT	WT	WT	WT	WT	WT	WT	WT	WT	WT	WT	WT	WT	WT	WT	WT	WT	WT	WT	WT	WT	WT	WT	WT	WT	WT	WT	WT	WT	WT	WT
coadread_dfci_2016	coadread_dfci_2016_316	WT	WT	WT	WT	WT	WT	WT	WT	WT	WT	WT	WT	WT	WT	WT	WT	WT	WT	WT	WT	WT	WT	WT	WT	WT	WT	WT	WT	WT	WT	WT	WT	R625W	WT	WT	WT	WT	WT	WT	WT	WT	WT	WT	A385S	WT	WT	WT	WT
coadread_dfci_2016	coadread_dfci_2016_106	WT	WT	WT	WT	WT	WT	WT	WT	WT	WT	WT	WT	WT	WT	WT	WT	WT	WT	WT	WT	WT	WT	WT	WT	WT	WT	WT	WT	WT	WT	WT	WT	WT	WT	WT	WT	WT	WT	WT	WT	WT	WT	WT	R257Q	WT	WT	WT	WT
coadread_dfci_2016	coadread_dfci_2016_1160	WT	WT	WT	WT	WT	WT	WT	WT	WT	WT	R2174Q	WT	WT	WT	WT	WT	WT	R3359*	WT	WT	R854C	WT	WT	WT	WT	WT	WT	WT	G341R	WT	WT	WT	WT	WT	WT	WT	WT	WT	WT	WT	WT	WT	WT	WT	WT	WT	WT	WT
coadread_dfci_2016	coadread_dfci_2016_2430	WT	WT	WT	WT	WT	WT	WT	WT	WT	WT	WT	WT	WT	WT	WT	WT	WT	WT	WT	WT	WT	WT	WT	WT	WT	WT	WT	WT	WT	WT	WT	WT	WT	WT	WT	WT	WT	WT	WT	WT	A1188T	WT	WT	WT	WT	WT	WT	WT
coadread_dfci_2016	coadread_dfci_2016_1226	WT	WT	P4273L	WT	WT	WT	WT	WT	WT	WT	WT	WT	WT	WT	WT	WT	WT	WT	WT	WT	A59S	G2899R	WT	WT	WT	WT	WT	WT	WT	WT	WT	WT	WT	WT	WT	WT	WT	WT	WT	V2163M	WT	WT	WT	WT	WT	WT	WT	WT
coadread_dfci_2016	coadread_dfci_2016_164221	WT	WT	WT	WT	WT	WT	WT	WT	WT	WT	WT	WT	WT	WT	WT	WT	WT	WT	WT	WT	WT	WT	WT	WT	WT	R1924C	WT	WT	WT	WT	WT	WT	WT	WT	WT	WT	WT	WT	WT	WT	WT	WT	WT	WT	WT	WT	WT	WT
coadread_dfci_2016	coadread_dfci_2016_1153	WT	WT	WT	WT	WT	L1053I	WT	WT	WT	WT	WT	WT	WT	WT	D2014N	WT	WT	A498V	WT	WT	WT	WT	WT	WT	WT	WT	WT	WT	WT	WT	WT	WT	WT	WT	WT	WT	WT	WT	WT	WT	WT	WT	WT	WT	WT	WT	WT	WT
coadread_dfci_2016	coadread_dfci_2016_3668	WT	WT	WT	WT	WT	WT	WT	WT	WT	WT	WT	WT	WT	WT	WT	WT	WT	WT	WT	WT	WT	WT	WT	WT	WT	WT	WT	WT	WT	WT	WT	WT	WT	WT	WT	WT	R1378Q	WT	WT	WT	WT	WT	WT	WT	WT	WT	WT	WT
coadread_dfci_2016	coadread_dfci_2016_262114	WT	WT	WT	WT	WT	WT	R134Q	WT	WT	WT	WT	WT	WT	WT	WT	WT	WT	WT	WT	WT	WT	WT	WT	WT	D1421N	WT	WT	WT	WT	WT	WT	WT	WT	WT	WT	WT	I2135N	WT	WT	WT	WT	WT	WT	WT	WT	WT	WT	WT
coadread_dfci_2016	coadread_dfci_2016_3191	WT	R1181H	WT	WT	WT	WT	WT	WT	WT	WT	WT	WT	WT	WT	WT	WT	WT	WT	WT	WT	WT	WT	WT	WT	WT	WT	WT	WT	WT	WT	WT	WT	WT	WT	WT	WT	WT	WT	WT	WT	WT	WT	WT	WT	R341*	WT	T263A	WT
coadread_dfci_2016	coadread_dfci_2016_3546	WT	WT	WT	R1068*	WT	WT	WT	WT	WT	WT	WT	WT	WT	WT	WT	WT	WT	WT	WT	WT	WT	WT	WT	WT	E2174K	WT	WT	WT	WT	WT	WT	WT	WT	WT	WT	WT	WT	WT	WT	WT	WT	WT	WT	WT	WT	WT	WT	WT
coadread_dfci_2016	coadread_dfci_2016_3680	WT	WT	WT	WT	WT	WT	WT	WT	WT	WT	WT	Q2510H	WT	WT	WT	WT	WT	WT	WT	WT	WT	WT	WT	WT	WT	WT	WT	WT	WT	WT	WT	WT	WT	WT	WT	WT	A383T	WT	WT	WT	WT	WT	WT	WT	WT	WT	WT	WT
coadread_dfci_2016	coadread_dfci_2016_2991	WT	WT	WT	WT	WT	WT	Q92P	WT	WT	WT	WT	WT	WT	WT	WT	WT	WT	WT	WT	WT	WT	WT	WT	WT	WT	WT	WT	WT	WT	WT	WT	WT	WT	WT	WT	WT	WT	WT	WT	WT	WT	WT	WT	WT	WT	WT	WT	WT
coadread_dfci_2016	coadread_dfci_2016_504	WT	WT	WT	WT	A1363V	R344K	WT	WT	WT	WT	WT	WT	WT	WT	WT	WT	WT	WT	WT	WT	WT	WT	WT	WT	WT	WT	WT	WT	WT	WT	WT	WT	WT	WT	WT	WT	WT	WT	WT	WT	WT	WT	WT	WT	WT	WT	WT	WT
coadread_dfci_2016	coadread_dfci_2016_3053	WT	WT	WT	WT	WT	WT	WT	WT	WT	WT	WT	WT	WT	WT	WT	WT	WT	WT	WT	WT	WT	N1253S V1269F	WT	WT	WT	WT	X1461_splice	WT	WT	WT	WT	WT	WT	R403H	WT	WT	WT	WT	WT	WT	WT	WT	WT	WT	WT	WT	WT	WT
coadread_dfci_2016	coadread_dfci_2016_1247	WT	WT	WT	WT	WT	WT	WT	WT	WT	WT	WT	WT	WT	WT	WT	WT	WT	WT	WT	WT	WT	WT	WT	WT	WT	Q2940*	WT	WT	WT	WT	WT	WT	WT	R432Q	WT	WT	WT	WT	WT	WT	WT	WT	WT	WT	WT	WT	WT	WT
coadread_dfci_2016	coadread_dfci_2016_2969	WT	WT	WT	WT	WT	WT	WT	WT	WT	WT	WT	WT	WT	WT	WT	WT	WT	WT	WT	WT	WT	N2047T	WT	WT	WT	WT	WT	WT	WT	WT	WT	WT	WT	WT	WT	WT	WT	E1624G	WT	WT	WT	WT	WT	WT	WT	V939I	WT	WT
coadread_dfci_2016	coadread_dfci_2016_2775	WT	WT	WT	WT	WT	WT	WT	R2535*	WT	WT	WT	WT	WT	WT	WT	WT	WT	WT	WT	WT	WT	WT	WT	WT	WT	WT	WT	WT	WT	WT	WT	WT	WT	WT	WT	WT	WT	WT	WT	WT	WT	WT	I2196V	WT	WT	WT	WT	WT
coadread_dfci_2016	coadread_dfci_2016_2265	WT	R808Q	WT	WT	WT	WT	WT	WT	WT	WT	WT	WT	WT	WT	WT	WT	WT	WT	WT	R1099H	WT	WT	WT	WT	WT	G872R	WT	WT	WT	WT	WT	WT	WT	WT	WT	WT	WT	WT	WT	WT	WT	WT	WT	WT	WT	WT	WT	WT
coadread_dfci_2016	coadread_dfci_2016_2271	WT	WT	WT	WT	WT	WT	WT	WT	WT	R989Q	WT	WT	WT	WT	WT	WT	WT	WT	WT	A2679T	WT	WT	WT	WT	WT	WT	WT	WT	WT	WT	WT	WT	WT	WT	WT	WT	WT	WT	WT	WT	WT	WT	WT	WT	WT	WT	WT	WT
coadread_dfci_2016	coadread_dfci_2016_4536	WT	WT	WT	WT	WT	WT	WT	WT	WT	WT	WT	WT	WT	WT	WT	WT	R2454Q	WT	WT	WT	WT	WT	WT	WT	WT	WT	WT	WT	WT	WT	WT	WT	WT	WT	WT	WT	WT	WT	WT	WT	WT	WT	WT	WT	WT	WT	WT	WT
coadread_dfci_2016	coadread_dfci_2016_2394	WT	WT	WT	S951I	WT	WT	WT	WT	WT	WT	WT	X2803_splice	WT	WT	WT	WT	WT	R1627C	WT	WT	WT	WT	R1309Q	WT	WT	WT	WT	WT	WT	WT	WT	WT	WT	WT	WT	WT	WT	WT	WT	WT	D825N	WT	WT	WT	WT	WT	WT	WT
coadread_dfci_2016	coadread_dfci_2016_202	WT	WT	WT	WT	WT	WT	WT	WT	WT	WT	WT	WT	WT	WT	WT	WT	G2114R	WT	WT	WT	WT	WT	P3269S	WT	WT	WT	WT	WT	WT	WT	WT	WT	WT	WT	WT	WT	WT	S1564N	WT	WT	WT	R1630Q	WT	WT	WT	WT	WT	WT
coadread_dfci_2016	coadread_dfci_2016_3108	WT	R477W	WT	WT	WT	WT	WT	WT	WT	WT	WT	WT	WT	WT	WT	WT	WT	WT	WT	WT	WT	WT	WT	WT	WT	WT	WT	WT	R1647W	WT	WT	WT	WT	WT	WT	WT	WT	WT	WT	WT	WT	WT	WT	WT	V132F	WT	WT	WT
coadread_dfci_2016	coadread_dfci_2016_1193	WT	WT	WT	WT	R1098W	WT	WT	WT	WT	WT	WT	WT	WT	WT	WT	WT	WT	R1152W	WT	WT	WT	WT	WT	WT	WT	WT	WT	WT	WT	WT	WT	X95_splice	WT	WT	WT	WT	WT	WT	WT	WT	WT	WT	WT	WT	WT	WT	R3375W	WT
coadread_dfci_2016	coadread_dfci_2016_2941	WT	WT	WT	WT	WT	WT	WT	WT	WT	WT	WT	WT	WT	WT	WT	WT	WT	WT	R2629H	WT	WT	WT	WT	WT	WT	WT	WT	WT	WT	WT	WT	WT	WT	WT	WT	WT	WT	WT	WT	WT	WT	T1367S	WT	WT	WT	WT	WT	WT
coadread_dfci_2016	coadread_dfci_2016_2250	WT	WT	WT	WT	WT	WT	WT	WT	WT	WT	WT	WT	WT	WT	WT	WT	WT	WT	WT	WT	WT	WT	WT	WT	WT	X1148_splice	WT	WT	WT	WT	WT	WT	WT	WT	WT	WT	WT	WT	WT	WT	WT	WT	WT	WT	WT	WT	WT	WT
coadread_dfci_2016	coadread_dfci_2016_628	WT	WT	WT	WT	S1277F	WT	WT	WT	WT	WT	WT	WT	WT	WT	WT	A424T	WT	WT	WT	WT	X807_splice	WT	WT	WT	WT	WT	WT	WT	G970S	WT	WT	WT	WT	WT	WT	R1437P	WT	WT	WT	WT	WT	WT	WT	WT	WT	WT	WT	WT
coadread_dfci_2016	coadread_dfci_2016_214901	WT	WT	WT	WT	WT	WT	WT	WT	WT	G954S	WT	WT	WT	WT	WT	WT	WT	WT	WT	A2859T	WT	WT	WT	WT	WT	WT	WT	WT	WT	WT	V2431M	WT	WT	WT	WT	WT	WT	A2843T	WT	WT	R2139W	Q1640L T1642I	WT	WT	WT	WT	WT	WT
coadread_dfci_2016	coadread_dfci_2016_1205	WT	WT	WT	WT	WT	WT	Y1131C	WT	V5554G	WT	WT	WT	WT	WT	WT	WT	WT	WT	WT	WT	WT	WT	WT	WT	Q176K	WT	WT	WT	WT	WT	WT	WT	WT	WT	WT	WT	WT	WT	R347W	WT	WT	WT	WT	WT	WT	R529Q	WT	WT
coadread_dfci_2016	coadread_dfci_2016_1157	WT	WT	WT	WT	WT	WT	WT	WT	WT	WT	WT	WT	WT	WT	WT	WT	WT	WT	WT	WT	WT	WT	WT	WT	WT	WT	V1470M	WT	WT	WT	WT	G475V	WT	WT	WT	WT	WT	WT	WT	WT	WT	WT	WT	WT	WT	WT	WT	WT
coadread_dfci_2016	coadread_dfci_2016_3304	WT	WT	WT	WT	WT	WT	WT	WT	WT	G1316V	WT	WT	WT	WT	WT	WT	WT	WT	WT	WT	WT	WT	WT	WT	WT	WT	WT	WT	WT	WT	WT	WT	WT	WT	WT	WT	WT	WT	C612S	WT	WT	WT	WT	WT	WT	WT	WT	WT
coadread_dfci_2016	coadread_dfci_2016_444	R25H	WT	WT	WT	WT	WT	WT	WT	WT	WT	WT	WT	WT	WT	WT	WT	WT	WT	WT	WT	WT	WT	WT	WT	WT	WT	WT	WT	WT	WT	WT	WT	WT	WT	C533Y	WT	WT	WT	WT	WT	WT	WT	WT	WT	WT	WT	WT	R3417* D2468N
coadread_dfci_2016	coadread_dfci_2016_112874	WT	WT	WT	WT	WT	WT	WT	WT	WT	WT	WT	E620Q	WT	WT	WT	WT	WT	WT	WT	WT	WT	WT	WT	WT	WT	WT	WT	WT	WT	WT	WT	WT	WT	WT	WT	WT	WT	WT	WT	WT	WT	WT	WT	WT	WT	WT	WT	WT
coadread_dfci_2016	coadread_dfci_2016_3485	WT	WT	WT	R440*	WT	WT	WT	WT	WT	WT	WT	WT	WT	WT	WT	WT	WT	WT	WT	WT	R1617Q	WT	WT	WT	WT	WT	WT	WT	WT	WT	WT	WT	WT	WT	WT	WT	WT	WT	WT	WT	WT	WT	WT	WT	WT	WT	WT	WT
coadread_dfci_2016	coadread_dfci_2016_2955	WT	WT	WT	WT	WT	WT	X1328_splice	WT	WT	WT	WT	WT	WT	WT	WT	WT	WT	WT	WT	WT	WT	WT	WT	WT	WT	WT	R749Q	WT	WT	WT	T1124K	WT	WT	WT	WT	S268*	WT	S1202R	WT	WT	WT	WT	WT	WT	WT	WT	WT	WT
coadread_dfci_2016	coadread_dfci_2016_323	WT	WT	WT	WT	WT	WT	WT	WT	WT	WT	WT	WT	WT	WT	WT	WT	WT	WT	WT	WT	WT	WT	WT	WT	WT	WT	WT	WT	WT	WT	WT	WT	WT	WT	WT	WT	WT	WT	WT	R4132Q	WT	WT	WT	L939F	WT	WT	WT	WT
coadread_dfci_2016	coadread_dfci_2016_3674	WT	WT	WT	WT	WT	WT	WT	WT	WT	WT	WT	WT	R1511C	WT	WT	WT	WT	WT	WT	WT	WT	WT	WT	WT	WT	WT	WT	WT	WT	WT	R2228Q	V78L	WT	S2644L	WT	D1784N	WT	WT	WT	WT	WT	WT	WT	WT	WT	WT	WT	WT
coadread_dfci_2016	coadread_dfci_2016_2247	WT	WT	WT	WT	WT	WT	WT	WT	WT	WT	WT	R389W D2051Y	WT	WT	WT	WT	WT	WT	WT	WT	WT	WT	WT	R1453H	WT	WT	WT	WT	WT	N1671Ifs*4	WT	WT	WT	WT	WT	WT	WT	G1084D	WT	R587H	WT	WT	WT	WT	WT	WT	WT	WT
coadread_dfci_2016	coadread_dfci_2016_2455	WT	WT	WT	WT	WT	WT	WT	WT	WT	WT	WT	WT	WT	WT	WT	WT	WT	WT	WT	WT	WT	WT	WT	WT	WT	WT	WT	WT	WT	WT	WT	WT	WT	R2103Q	WT	WT	WT	WT	WT	WT	WT	WT	WT	WT	WT	WT	WT	WT
coadread_dfci_2016	coadread_dfci_2016_426	WT	R66C	WT	WT	WT	WT	WT	WT	WT	WT	WT	WT	WT	WT	WT	WT	WT	WT	WT	WT	WT	WT	WT	WT	WT	WT	WT	WT	WT	WT	WT	WT	E1152K	WT	WT	WT	WT	WT	WT	WT	WT	WT	WT	WT	WT	WT	WT	WT
coadread_dfci_2016	coadread_dfci_2016_2621	WT	WT	WT	WT	WT	WT	WT	WT	WT	WT	WT	WT	WT	WT	WT	C1291R	WT	WT	WT	WT	WT	WT	WT	WT	WT	WT	WT	WT	WT	WT	WT	WT	WT	WT	WT	R1461C	WT	WT	WT	WT	WT	WT	WT	WT	WT	WT	WT	WT
coadread_dfci_2016	coadread_dfci_2016_277	WT	WT	WT	WT	WT	WT	WT	WT	WT	WT	P3210L	WT	WT	WT	WT	WT	WT	WT	WT	WT	WT	WT	WT	WT	WT	WT	WT	WT	WT	WT	WT	WT	WT	WT	WT	WT	WT	WT	WT	WT	WT	WT	WT	WT	WT	WT	WT	WT
coadread_dfci_2016	coadread_dfci_2016_3092	T1250M	WT	WT	WT	WT	WT	WT	WT	WT	WT	WT	WT	WT	WT	WT	WT	WT	WT	WT	WT	WT	WT	R2736Q	WT	WT	WT	WT	WT	WT	WT	WT	WT	WT	WT	WT	WT	WT	WT	WT	WT	WT	WT	WT	A869V	WT	WT	WT	WT
coadread_dfci_2016	coadread_dfci_2016_2769	WT	WT	WT	WT	WT	WT	K1580E	WT	WT	WT	WT	WT	WT	A4961E	WT	WT	WT	WT	WT	WT	WT	WT	WT	WT	WT	WT	WT	WT	WT	WT	WT	WT	WT	WT	WT	WT	WT	WT	WT	WT	WT	WT	WT	WT	WT	WT	WT	WT
coadread_dfci_2016	coadread_dfci_2016_3479	WT	WT	WT	WT	WT	WT	WT	WT	WT	WT	WT	WT	WT	WT	WT	WT	WT	A1020V	WT	WT	WT	WT	WT	WT	WT	WT	WT	WT	WT	WT	WT	WT	WT	WT	WT	WT	WT	WT	WT	WT	WT	WT	WT	WT	WT	WT	WT	WT
coadread_dfci_2016	coadread_dfci_2016_405	WT	WT	WT	WT	WT	WT	WT	WT	WT	WT	WT	WT	WT	WT	WT	WT	WT	WT	WT	WT	WT	WT	WT	WT	WT	WT	WT	WT	WT	WT	WT	WT	WT	WT	WT	WT	WT	WT	WT	WT	WT	WT	WT	WT	WT	WT	WT	WT
coadread_dfci_2016	coadread_dfci_2016_2767	WT	WT	WT	WT	WT	WT	WT	L3315M	WT	WT	WT	WT	WT	WT	WT	WT	WT	WT	WT	WT	WT	WT	WT	WT	WT	WT	WT	WT	WT	WT	WT	G2682D	WT	WT	WT	WT	WT	WT	WT	M46I	A12T	WT	T1460M	WT	WT	WT	WT	WT
coadread_dfci_2016	coadread_dfci_2016_3660	WT	WT	T1981I	WT	WT	WT	WT	WT	WT	WT	WT	WT	WT	WT	WT	A308S	WT	WT	WT	WT	R1713C	WT	WT	WT	WT	WT	WT	WT	WT	WT	WT	WT	WT	WT	WT	WT	N1578I	WT	WT	WT	WT	WT	WT	WT	WT	WT	WT	WT
coadread_dfci_2016	coadread_dfci_2016_3062	WT	WT	WT	WT	WT	WT	WT	WT	WT	WT	WT	WT	WT	WT	WT	WT	WT	WT	WT	WT	WT	WT	WT	WT	WT	WT	WT	WT	WT	WT	WT	WT	WT	WT	G2610S	WT	WT	WT	WT	WT	WT	WT	WT	WT	WT	WT	WT	WT
coadread_dfci_2016	coadread_dfci_2016_3294	WT	WT	WT	WT	WT	WT	WT	WT	WT	WT	WT	WT	WT	WT	WT	WT	WT	WT	WT	WT	WT	WT	WT	WT	WT	WT	WT	WT	WT	WT	WT	WT	WT	WT	WT	WT	WT	WT	WT	WT	WT	WT	WT	WT	R320T	WT	WT	WT
coadread_dfci_2016	coadread_dfci_2016_2967	WT	WT	WT	WT	WT	WT	WT	WT	WT	WT	WT	WT	WT	WT	WT	WT	WT	WT	WT	WT	WT	WT	WT	WT	WT	WT	WT	WT	WT	WT	R1291H	WT	WT	WT	WT	WT	WT	WT	WT	WT	WT	WT	WT	WT	WT	WT	WT	WT
coadread_dfci_2016	coadread_dfci_2016_3265	WT	WT	WT	WT	WT	WT	WT	WT	WT	WT	WT	WT	WT	WT	WT	P543L	WT	WT	WT	WT	WT	WT	WT	WT	WT	WT	R772W	WT	WT	WT	WT	G1824D	WT	WT	WT	WT	WT	WT	WT	WT	WT	WT	WT	WT	WT	WT	WT	WT
coadread_dfci_2016	coadread_dfci_2016_3232	WT	WT	WT	WT	WT	WT	WT	WT	WT	WT	WT	WT	WT	WT	WT	WT	WT	WT	WT	WT	WT	WT	WT	WT	WT	WT	WT	WT	WT	A51T Y927C	WT	WT	WT	WT	WT	WT	WT	WT	WT	WT	WT	WT	P773L	WT	WT	WT	WT	WT
coadread_dfci_2016	coadread_dfci_2016_3725	WT	WT	WT	WT	WT	WT	WT	WT	WT	WT	WT	T567M	WT	WT	WT	WT	WT	R747Q	R2712H	WT	WT	WT	WT	WT	WT	WT	WT	WT	WT	WT	WT	WT	WT	WT	WT	WT	WT	WT	WT	WT	WT	WT	WT	WT	WT	WT	WT	WT
coadread_dfci_2016	coadread_dfci_2016_691	WT	R22Q	WT	WT	WT	A1899S	WT	WT	WT	WT	WT	WT	WT	WT	WT	WT	P4395S	WT	WT	WT	WT	WT	WT	WT	WT	WT	WT	WT	WT	WT	WT	WT	WT	R175Q	R2006C	WT	WT	WT	WT	WT	WT	WT	WT	WT	WT	WT	WT	WT
coadread_dfci_2016	coadread_dfci_2016_2457	WT	WT	WT	WT	WT	WT	WT	WT	WT	WT	WT	WT	WT	WT	WT	WT	WT	WT	WT	WT	WT	WT	R2462*	WT	WT	WT	WT	WT	WT	WT	WT	WT	WT	WT	WT	WT	WT	WT	WT	WT	WT	WT	WT	WT	WT	WT	WT	WT
coadread_dfci_2016	coadread_dfci_2016_3323	WT	WT	WT	WT	WT	WT	WT	D3451Y	WT	WT	WT	WT	D2713N	C3430R	WT	WT	WT	WT	WT	WT	WT	WT	WT	WT	WT	WT	WT	WT	WT	WT	WT	WT	D1088N R1023H	WT	WT	WT	WT	WT	WT	WT	WT	WT	WT	WT	WT	WT	WT	WT
coadread_dfci_2016	coadread_dfci_2016_1743	WT	WT	WT	WT	WT	WT	WT	WT	WT	WT	WT	WT	WT	WT	WT	WT	I3403S	WT	WT	WT	WT	WT	WT	WT	WT	WT	WT	WT	WT	WT	WT	WT	WT	WT	WT	WT	WT	WT	WT	WT	WT	WT	WT	WT	WT	WT	L2709V	WT
coadread_dfci_2016	coadread_dfci_2016_2364	WT	R103*	WT	WT	WT	WT	WT	WT	WT	WT	WT	WT	WT	WT	WT	R505Q	WT	WT	WT	WT	WT	WT	WT	WT	WT	WT	WT	WT	WT	WT	WT	WT	WT	WT	WT	WT	WT	WT	WT	WT	WT	WT	WT	WT	WT	WT	WT	WT
coadread_dfci_2016	coadread_dfci_2016_160282	WT	WT	WT	WT	WT	WT	WT	WT	WT	WT	WT	WT	WT	WT	WT	WT	WT	WT	WT	WT	WT	WT	WT	WT	WT	WT	WT	WT	WT	WT	WT	WT	WT	WT	WT	WT	WT	WT	WT	WT	WT	WT	WT	WT	WT	WT	WT	WT
coadread_dfci_2016	coadread_dfci_2016_3557	WT	WT	WT	WT	WT	WT	WT	WT	WT	WT	WT	A2771T	WT	WT	WT	WT	WT	WT	WT	WT	WT	WT	WT	WT	WT	WT	WT	WT	WT	WT	R2437Q	WT	WT	WT	WT	WT	WT	WT	WT	WT	WT	WT	WT	WT	WT	WT	WT	WT
coadread_dfci_2016	coadread_dfci_2016_3234	WT	WT	WT	WT	WT	WT	WT	WT	WT	WT	WT	WT	G2681S	WT	WT	WT	WT	WT	WT	WT	WT	WT	WT	WT	WT	WT	WT	WT	WT	R163Q	WT	WT	WT	WT	WT	WT	WT	WT	R347Q	P564L	WT	WT	WT	WT	WT	WT	T2663M	WT
coadread_dfci_2016	coadread_dfci_2016_615	WT	WT	WT	WT	WT	WT	WT	WT	WT	WT	WT	WT	WT	WT	WT	WT	WT	WT	WT	WT	WT	WT	WT	WT	WT	WT	WT	WT	WT	WT	WT	WT	WT	WT	WT	WT	WT	WT	WT	WT	WT	WT	WT	WT	WT	WT	WT	WT
coadread_dfci_2016	coadread_dfci_2016_1262	W3367*	WT	WT	WT	WT	WT	WT	WT	WT	WT	WT	WT	WT	WT	WT	WT	WT	WT	WT	WT	WT	WT	WT	WT	WT	WT	WT	WT	WT	WT	WT	WT	WT	WT	WT	WT	WT	WT	WT	WT	WT	WT	WT	WT	WT	WT	WT	WT
coadread_dfci_2016	coadread_dfci_2016_1224	WT	WT	WT	WT	WT	WT	WT	WT	WT	WT	WT	WT	WT	WT	WT	WT	WT	WT	WT	WT	WT	WT	WT	WT	WT	WT	WT	WT	WT	WT	WT	WT	WT	WT	WT	WT	WT	WT	WT	WT	P1929L	WT	R190C	WT	WT	WT	WT	WT
coadread_dfci_2016	coadread_dfci_2016_2284	WT	WT	WT	WT	WT	WT	WT	WT	WT	WT	WT	WT	R957Q	WT	WT	WT	WT	WT	WT	WT	WT	WT	WT	WT	WT	WT	WT	WT	WT	WT	WT	WT	WT	WT	WT	WT	V748I	WT	WT	WT	WT	WT	WT	WT	WT	WT	WT	WT
coadread_dfci_2016	coadread_dfci_2016_3002	WT	WT	WT	WT	WT	WT	WT	WT	WT	WT	WT	WT	WT	WT	WT	WT	WT	WT	WT	WT	WT	WT	WT	WT	WT	WT	WT	WT	WT	WT	WT	WT	WT	WT	WT	WT	WT	WT	WT	WT	WT	WT	WT	WT	WT	WT	WT	WT
coadread_dfci_2016	coadread_dfci_2016_603	WT	WT	WT	WT	WT	WT	WT	WT	WT	WT	WT	WT	WT	WT	WT	WT	WT	WT	WT	WT	WT	WT	WT	WT	WT	WT	WT	WT	WT	WT	WT	WT	WT	WT	WT	WT	WT	WT	WT	WT	R580W	WT	WT	WT	WT	WT	WT	WT
coadread_dfci_2016	coadread_dfci_2016_3671	WT	WT	WT	WT	WT	WT	WT	WT	WT	WT	WT	WT	WT	WT	WT	WT	WT	WT	WT	WT	WT	WT	WT	WT	WT	WT	WT	WT	WT	WT	WT	WT	WT	WT	WT	WT	WT	WT	WT	WT	WT	WT	WT	WT	WT	WT	WT	WT
coadread_dfci_2016	coadread_dfci_2016_223	WT	WT	WT	WT	WT	WT	WT	WT	WT	WT	WT	WT	WT	WT	WT	WT	WT	WT	WT	WT	WT	WT	WT	WT	WT	WT	WT	WT	E1136K	WT	WT	WT	WT	WT	WT	WT	WT	WT	WT	WT	WT	WT	WT	WT	WT	WT	WT	WT
coadread_dfci_2016	coadread_dfci_2016_1249	WT	WT	WT	WT	WT	WT	WT	WT	WT	WT	WT	WT	WT	WT	WT	WT	WT	WT	WT	WT	WT	WT	WT	WT	WT	WT	WT	WT	WT	WT	WT	WT	WT	WT	WT	Q312*	WT	WT	WT	WT	WT	WT	WT	WT	WT	WT	WT	WT
coadread_dfci_2016	coadread_dfci_2016_43	WT	WT	WT	WT	WT	WT	WT	WT	WT	WT	WT	WT	WT	WT	T2007M	WT	WT	WT	WT	WT	S435L	WT	WT	WT	WT	WT	WT	WT	WT	WT	WT	WT	WT	WT	WT	WT	WT	WT	WT	H726Q	WT	WT	WT	WT	WT	WT	WT	WT
coadread_dfci_2016	coadread_dfci_2016_4533	WT	WT	WT	WT	WT	WT	WT	WT	WT	WT	WT	WT	WT	WT	WT	WT	WT	WT	WT	WT	WT	WT	WT	WT	P520L	WT	R197H	WT	WT	WT	WT	WT	WT	X278_splice	WT	WT	WT	WT	WT	WT	WT	WT	WT	WT	WT	WT	WT	WT
coadread_dfci_2016	coadread_dfci_2016_214060	WT	WT	WT	WT	WT	WT	WT	WT	WT	WT	A1247V	WT	WT	WT	WT	WT	WT	WT	WT	WT	WT	WT	WT	WT	WT	WT	WT	WT	WT	WT	WT	WT	WT	WT	WT	WT	WT	WT	WT	WT	WT	WT	WT	WT	WT	WT	WT	WT
coadread_dfci_2016	coadread_dfci_2016_1156	WT	WT	WT	WT	WT	WT	WT	WT	WT	WT	WT	WT	WT	WT	WT	WT	WT	WT	WT	WT	WT	WT	WT	WT	WT	WT	WT	WT	WT	WT	WT	WT	WT	WT	WT	WT	WT	WT	WT	WT	WT	WT	WT	WT	WT	WT	WT	WT
coadread_dfci_2016	coadread_dfci_2016_204	WT	WT	WT	WT	WT	WT	WT	WT	WT	WT	WT	WT	WT	I4416M L4417*	WT	WT	WT	WT	WT	WT	WT	WT	WT	WT	WT	WT	WT	WT	WT	WT	WT	WT	WT	WT	WT	WT	WT	WT	R269C	WT	WT	WT	WT	WT	WT	WT	WT	WT
coadread_dfci_2016	coadread_dfci_2016_3440	WT	WT	WT	WT	WT	WT	WT	V168I	WT	WT	WT	WT	WT	WT	WT	WT	WT	WT	WT	WT	WT	WT	WT	WT	WT	WT	WT	WT	WT	WT	WT	V1754Sfs*13	R105C	WT	WT	WT	WT	WT	WT	WT	WT	WT	WT	WT	WT	WT	WT	WT
coadread_dfci_2016	coadread_dfci_2016_1794	WT	WT	WT	WT	WT	WT	WT	T2139A	WT	WT	WT	WT	WT	WT	WT	WT	WT	WT	WT	WT	WT	S535I	WT	WT	WT	WT	WT	WT	WT	WT	WT	WT	WT	WT	WT	WT	WT	WT	WT	T563M	WT	WT	WT	WT	WT	WT	WT	WT
coadread_dfci_2016	coadread_dfci_2016_101930	WT	WT	WT	WT	WT	WT	WT	WT	WT	WT	WT	WT	WT	WT	WT	WT	WT	WT	WT	WT	WT	WT	WT	D616N	WT	WT	WT	WT	WT	WT	WT	WT	G1127S	WT	WT	WT	WT	WT	WT	WT	WT	WT	WT	WT	WT	WT	WT	WT
coadread_dfci_2016	coadread_dfci_2016_604	WT	WT	WT	WT	WT	WT	WT	WT	WT	WT	WT	WT	WT	WT	WT	WT	WT	T466M	WT	WT	WT	WT	WT	WT	WT	WT	WT	WT	WT	WT	WT	WT	WT	WT	WT	WT	WT	WT	WT	WT	WT	WT	WT	WT	WT	WT	WT	WT
coadread_dfci_2016	coadread_dfci_2016_3712	WT	WT	WT	WT	WT	WT	WT	WT	WT	R372C	WT	WT	WT	WT	WT	WT	D1787A	WT	WT	WT	WT	WT	WT	WT	WT	WT	WT	WT	WT	WT	WT	WT	WT	WT	WT	WT	WT	WT	WT	WT	WT	WT	P267L	WT	WT	WT	WT	WT
coadread_dfci_2016	coadread_dfci_2016_4526	WT	WT	WT	WT	WT	WT	WT	WT	WT	WT	WT	WT	WT	WT	WT	WT	WT	WT	WT	WT	WT	WT	WT	WT	WT	WT	WT	WT	WT	WT	WT	WT	WT	WT	WT	WT	WT	WT	WT	WT	WT	WT	WT	WT	WT	WT	WT	WT
coadread_dfci_2016	coadread_dfci_2016_4537	WT	WT	WT	WT	WT	WT	WT	WT	WT	WT	WT	WT	WT	WT	L2153W	WT	WT	WT	WT	WT	WT	WT	WT	WT	WT	WT	WT	WT	WT	WT	WT	WT	WT	WT	WT	WT	WT	WT	WT	WT	WT	WT	WT	WT	WT	WT	WT	WT
coadread_dfci_2016	coadread_dfci_2016_2765	WT	WT	WT	V1244M E680*	WT	WT	WT	WT	WT	WT	WT	WT	WT	WT	WT	WT	WT	WT	WT	WT	WT	R1475C	WT	WT	WT	WT	WT	WT	WT	WT	WT	WT	WT	WT	WT	WT	WT	WT	WT	WT	WT	WT	WT	WT	WT	WT	WT	WT
coadread_dfci_2016	coadread_dfci_2016_3016	WT	WT	T3466A	P970T	WT	WT	WT	WT	WT	WT	WT	WT	WT	WT	WT	WT	WT	WT	WT	WT	WT	C849S	WT	WT	WT	V2480M	WT	WT	WT	WT	WT	WT	WT	WT	WT	WT	WT	WT	WT	WT	WT	WT	WT	R921*	WT	WT	WT	WT
coadread_dfci_2016	coadread_dfci_2016_358480	WT	WT	WT	R503W	WT	WT	WT	WT	WT	WT	WT	WT	WT	WT	WT	WT	WT	WT	WT	WT	WT	WT	WT	WT	WT	WT	WT	WT	WT	WT	WT	WT	WT	WT	WT	WT	WT	WT	WT	WT	WT	WT	R1582L	WT	WT	WT	WT	WT
coadread_dfci_2016	coadread_dfci_2016_222	WT	WT	WT	WT	WT	WT	WT	WT	WT	WT	WT	WT	WT	WT	WT	WT	L2848Q	WT	WT	WT	WT	WT	WT	WT	WT	WT	WT	WT	WT	WT	WT	WT	WT	WT	WT	WT	WT	WT	WT	WT	WT	WT	WT	WT	WT	WT	WT	WT
coadread_dfci_2016	coadread_dfci_2016_2260	WT	WT	WT	WT	WT	WT	WT	WT	WT	WT	E3796K S3584L	WT	WT	WT	WT	WT	WT	WT	WT	WT	WT	WT	WT	WT	WT	WT	WT	WT	WT	WT	WT	WT	WT	WT	WT	WT	WT	WT	WT	WT	WT	WT	WT	WT	WT	WT	WT	WT
coadread_dfci_2016	coadread_dfci_2016_30	WT	WT	WT	WT	WT	WT	WT	WT	WT	WT	WT	R1344C	WT	WT	WT	WT	WT	WT	WT	WT	WT	WT	WT	WT	WT	WT	WT	M3473I	WT	WT	WT	WT	WT	WT	WT	WT	WT	WT	WT	WT	WT	WT	WT	WT	WT	WT	WT	WT
coadread_dfci_2016	coadread_dfci_2016_1170	WT	WT	WT	WT	WT	WT	WT	WT	WT	WT	WT	WT	WT	WT	WT	WT	WT	WT	WT	WT	R1550K L2268F	WT	WT	WT	WT	WT	WT	WT	WT	WT	WT	WT	WT	WT	WT	WT	WT	WT	A654T	WT	WT	WT	WT	WT	WT	WT	WT	WT
coadread_dfci_2016	coadread_dfci_2016_2760	WT	WT	WT	WT	WT	WT	WT	WT	WT	WT	WT	WT	R122*	WT	WT	WT	WT	WT	WT	WT	WT	WT	WT	WT	WT	WT	WT	WT	WT	WT	WT	WT	WT	WT	WT	WT	WT	WT	WT	WT	WT	WT	WT	WT	WT	WT	WT	WT
coadread_dfci_2016	coadread_dfci_2016_283200	WT	WT	WT	WT	WT	E1481K	WT	WT	A4581V	WT	WT	WT	WT	WT	WT	WT	WT	WT	WT	WT	WT	WT	WT	WT	WT	WT	WT	WT	WT	WT	WT	WT	WT	WT	WT	WT	WT	WT	WT	WT	WT	WT	WT	WT	WT	WT	WT	WT
coadread_dfci_2016	coadread_dfci_2016_1232	WT	WT	WT	WT	WT	WT	WT	WT	WT	WT	WT	WT	WT	WT	WT	WT	WT	WT	WT	WT	WT	WT	WT	WT	WT	WT	WT	R2896H	WT	R1514C	WT	WT	WT	WT	WT	WT	WT	WT	WT	WT	WT	WT	WT	WT	WT	WT	WT	WT
coadread_dfci_2016	coadread_dfci_2016_3529	WT	WT	WT	WT	WT	WT	WT	WT	WT	V1329I	WT	WT	WT	WT	WT	WT	WT	WT	WT	WT	WT	WT	WT	WT	WT	WT	WT	WT	WT	WT	WT	WT	WT	WT	T695M	WT	WT	WT	WT	WT	WT	WT	WT	WT	WT	WT	WT	WT
coadread_dfci_2016	coadread_dfci_2016_3058	WT	WT	WT	WT	WT	WT	WT	WT	WT	R855Q	WT	WT	WT	WT	WT	WT	WT	WT	WT	WT	WT	WT	WT	WT	WT	WT	WT	WT	WT	WT	WT	WT	WT	WT	WT	WT	WT	WT	WT	WT	WT	WT	WT	WT	WT	WT	WT	WT
coadread_dfci_2016	coadread_dfci_2016_193667	WT	WT	WT	WT	WT	WT	WT	WT	WT	WT	WT	WT	WT	A4850V	WT	WT	WT	WT	WT	WT	WT	WT	WT	WT	WT	WT	WT	WT	WT	WT	WT	WT	WT	WT	WT	WT	WT	WT	WT	WT	WT	WT	WT	WT	WT	WT	WT	WT
coadread_dfci_2016	coadread_dfci_2016_3059	L3563I	WT	WT	WT	WT	WT	WT	WT	WT	M986I	WT	WT	WT	WT	WT	WT	WT	WT	WT	WT	WT	WT	WT	WT	WT	WT	WT	WT	WT	WT	WT	WT	WT	WT	WT	WT	WT	WT	WT	WT	WT	WT	WT	WT	WT	WT	WT	WT
coadread_dfci_2016	coadread_dfci_2016_3496	WT	WT	WT	WT	WT	WT	WT	WT	WT	WT	WT	WT	WT	WT	WT	WT	WT	WT	WT	WT	WT	WT	A1648T	WT	WT	WT	WT	WT	WT	WT	WT	WT	T1567I	WT	WT	WT	WT	WT	WT	WT	WT	WT	WT	WT	WT	WT	WT	WT
coadread_dfci_2016	coadread_dfci_2016_442	WT	WT	WT	WT	P1390A	WT	WT	WT	WT	WT	WT	WT	WT	WT	G1017S	WT	WT	WT	WT	WT	WT	WT	WT	WT	WT	WT	WT	WT	WT	WT	WT	WT	WT	WT	WT	WT	F2168S	WT	WT	WT	WT	WT	WT	WT	WT	WT	WT	WT
coadread_dfci_2016	coadread_dfci_2016_2438	WT	WT	WT	G252R E694G	WT	WT	WT	WT	WT	P1611S	WT	WT	WT	WT	WT	A308T G337S	WT	WT	WT	WT	WT	WT	WT	WT	WT	WT	WT	WT	WT	WT	WT	WT	WT	R2089Q	WT	WT	S1995L	Q1942Rfs*9	G90R	WT	WT	WT	WT	WT	WT	WT	WT	WT
coadread_dfci_2016	coadread_dfci_2016_2939	WT	WT	WT	WT	WT	WT	WT	WT	WT	WT	WT	WT	WT	WT	WT	WT	WT	WT	WT	WT	WT	WT	WT	WT	WT	WT	WT	WT	WT	WT	WT	WT	WT	WT	WT	WT	WT	WT	WT	WT	WT	WT	WT	WT	I85F	WT	WT	WT
coadread_dfci_2016	coadread_dfci_2016_1227	WT	WT	WT	V713M	WT	WT	WT	WT	WT	WT	A1943T	WT	WT	WT	WT	WT	WT	WT	WT	WT	WT	WT	WT	WT	WT	WT	WT	WT	WT	WT	WT	WT	WT	WT	WT	WT	WT	WT	WT	R397W	WT	WT	WT	WT	F161L	WT	WT	WT
coadread_dfci_2016	coadread_dfci_2016_2410	WT	WT	WT	WT	WT	WT	WT	WT	WT	WT	WT	WT	WT	WT	WT	WT	WT	WT	WT	WT	WT	WT	WT	WT	WT	WT	WT	WT	WT	WT	WT	WT	WT	WT	WT	WT	WT	WT	WT	WT	WT	WT	WT	WT	WT	WT	WT	WT
coadread_dfci_2016	coadread_dfci_2016_3038	WT	WT	WT	WT	WT	WT	WT	WT	WT	WT	WT	WT	WT	WT	WT	WT	WT	WT	WT	WT	WT	WT	WT	WT	Q2806H G106D	WT	WT	WT	WT	WT	WT	WT	WT	WT	WT	WT	WT	WT	WT	WT	WT	R1982Q	WT	WT	WT	WT	WT	WT
coadread_dfci_2016	coadread_dfci_2016_3673	WT	WT	WT	WT	WT	WT	WT	WT	WT	WT	WT	G2329R	WT	WT	WT	WT	WT	WT	WT	WT	WT	WT	WT	WT	WT	WT	WT	WT	WT	WT	WT	WT	WT	WT	WT	WT	WT	WT	A27V	WT	WT	M926L	WT	WT	WT	WT	WT	WT
coadread_dfci_2016	coadread_dfci_2016_201263	WT	WT	WT	WT	WT	WT	WT	R123W	WT	WT	WT	WT	WT	WT	WT	WT	A1063T	WT	WT	WT	WT	WT	WT	WT	WT	WT	WT	WT	R225W	WT	WT	WT	WT	WT	WT	R1913*	WT	WT	WT	WT	WT	WT	WT	WT	WT	WT	WT	WT
coadread_dfci_2016	coadread_dfci_2016_3298	WT	WT	T2026M	WT	WT	WT	WT	WT	WT	WT	WT	WT	WT	WT	WT	WT	WT	S1412=	WT	WT	WT	WT	WT	WT	WT	WT	WT	WT	WT	WT	WT	WT	WT	WT	WT	WT	WT	WT	WT	WT	WT	WT	WT	WT	WT	WT	WT	WT
coadread_dfci_2016	coadread_dfci_2016_4506	WT	WT	WT	WT	WT	WT	WT	WT	WT	WT	WT	WT	WT	WT	WT	WT	WT	WT	WT	WT	P672Q	WT	WT	WT	WT	WT	WT	WT	WT	WT	WT	WT	WT	WT	WT	WT	WT	WT	WT	WT	WT	WT	WT	WT	WT	WT	WT	WT
coadread_dfci_2016	coadread_dfci_2016_354207	WT	WT	WT	WT	WT	WT	WT	WT	WT	WT	WT	WT	WT	WT	WT	WT	E821K	WT	WT	WT	WT	WT	WT	WT	WT	WT	WT	WT	WT	WT	WT	WT	WT	WT	WT	WT	WT	WT	WT	WT	WT	WT	WT	WT	WT	WT	WT	WT
coadread_dfci_2016	coadread_dfci_2016_3644	WT	WT	WT	WT	WT	WT	T249N	WT	WT	WT	WT	WT	WT	WT	WT	WT	WT	WT	WT	WT	WT	WT	WT	WT	WT	WT	WT	WT	WT	WT	WT	WT	WT	WT	V2504I	WT	WT	WT	A729V	WT	WT	WT	WT	G927R	WT	WT	WT	WT
coadread_dfci_2016	coadread_dfci_2016_20	WT	WT	WT	WT	WT	WT	WT	WT	WT	WT	WT	WT	WT	WT	WT	WT	WT	WT	WT	WT	WT	WT	WT	WT	WT	WT	WT	WT	WT	WT	WT	WT	WT	WT	WT	WT	WT	WT	WT	WT	WT	WT	WT	WT	WT	WT	WT	WT
coadread_dfci_2016	coadread_dfci_2016_3639	WT	R758Gfs*24	WT	WT	WT	WT	WT	WT	WT	WT	WT	WT	WT	WT	WT	WT	WT	WT	WT	WT	H1199L	WT	WT	WT	WT	WT	WT	WT	WT	WT	WT	WT	WT	WT	WT	WT	E2279K	WT	WT	WT	WT	WT	WT	WT	WT	WT	WT	WT
coadread_dfci_2016	coadread_dfci_2016_2434	WT	WT	WT	WT	WT	WT	WT	WT	WT	WT	WT	WT	WT	WT	WT	WT	WT	WT	WT	WT	L1626I	WT	WT	WT	WT	WT	WT	WT	WT	WT	WT	WT	WT	WT	WT	WT	WT	WT	WT	WT	WT	WT	WT	WT	WT	WT	WT	WT
coadread_dfci_2016	coadread_dfci_2016_4520	WT	WT	WT	WT	WT	WT	WT	WT	WT	WT	WT	WT	WT	WT	WT	WT	WT	WT	WT	WT	WT	WT	WT	WT	WT	WT	WT	WT	R574W	WT	WT	WT	WT	WT	WT	WT	V1893M	WT	WT	WT	WT	G1308V	WT	WT	WT	WT	WT	WT
coadread_dfci_2016	coadread_dfci_2016_229051	WT	R576*	D418E	WT	WT	WT	L210F	WT	WT	WT	WT	WT	WT	WT	WT	E448K	WT	WT	WT	WT	WT	WT	WT	WT	WT	WT	WT	WT	WT	WT	WT	WT	WT	WT	WT	WT	WT	WT	WT	WT	WT	WT	WT	WT	WT	WT	R720*	WT
coadread_dfci_2016	coadread_dfci_2016_3705	WT	WT	WT	WT	WT	WT	WT	WT	WT	WT	WT	WT	WT	WT	WT	WT	WT	WT	T2676M	WT	WT	WT	WT	WT	WT	WT	R1370*	WT	WT	WT	WT	WT	WT	WT	WT	WT	WT	WT	WT	WT	WT	WT	WT	WT	WT	WT	WT	WT
coadread_dfci_2016	coadread_dfci_2016_1803	WT	WT	WT	WT	WT	WT	WT	WT	WT	WT	WT	WT	WT	WT	WT	WT	WT	WT	WT	WT	WT	WT	WT	WT	WT	WT	WT	WT	WT	WT	WT	WT	WT	WT	WT	WT	WT	WT	WT	WT	WT	WT	WT	WT	WT	WT	WT	WT
coadread_dfci_2016	coadread_dfci_2016_3439	WT	WT	WT	WT	WT	WT	WT	WT	WT	WT	WT	WT	WT	WT	WT	WT	WT	WT	WT	WT	WT	WT	WT	WT	WT	R1286H	WT	WT	WT	WT	L1574P	WT	WT	WT	WT	WT	WT	WT	WT	WT	WT	WT	WT	WT	WT	WT	WT	WT
coadread_dfci_2016	coadread_dfci_2016_2259	WT	WT	WT	WT	WT	WT	WT	WT	WT	WT	WT	WT	WT	WT	R1349C	WT	E4432K	WT	WT	WT	WT	WT	WT	WT	WT	WT	N18K	WT	WT	WT	WT	WT	WT	WT	WT	WT	WT	WT	WT	WT	WT	WT	WT	WT	WT	WT	WT	WT
coadread_dfci_2016	coadread_dfci_2016_3699	WT	WT	WT	WT	WT	WT	WT	WT	WT	WT	WT	WT	WT	WT	WT	WT	WT	WT	WT	WT	WT	WT	WT	WT	WT	WT	WT	WT	WT	WT	WT	WT	WT	WT	WT	WT	WT	WT	WT	WT	WT	WT	WT	WT	WT	WT	WT	WT
coadread_dfci_2016	coadread_dfci_2016_3204	WT	WT	WT	WT	WT	WT	WT	WT	WT	WT	WT	WT	WT	WT	WT	WT	WT	WT	WT	G1442S	WT	WT	WT	WT	WT	WT	WT	WT	V656I	WT	WT	WT	WT	WT	WT	WT	WT	WT	WT	WT	WT	WT	WT	WT	WT	WT	WT	WT
coadread_dfci_2016	coadread_dfci_2016_3338	WT	WT	WT	E221V	WT	WT	WT	WT	X6730_splice	WT	WT	WT	WT	WT	WT	WT	WT	R2068H	WT	WT	WT	WT	WT	WT	WT	WT	WT	WT	WT	WT	WT	WT	WT	R1969Q P477S	WT	WT	WT	WT	WT	WT	WT	WT	WT	WT	WT	WT	WT	WT
coadread_dfci_2016	coadread_dfci_2016_3170	WT	WT	WT	WT	WT	WT	WT	WT	WT	WT	WT	WT	WT	WT	WT	WT	WT	WT	V3895M	WT	WT	WT	WT	WT	WT	WT	WT	WT	WT	WT	WT	WT	WT	WT	WT	WT	WT	WT	WT	A3343V	WT	WT	WT	WT	WT	WT	WT	R3846W
coadread_dfci_2016	coadread_dfci_2016_2976	WT	WT	WT	WT	WT	WT	WT	WT	WT	WT	WT	WT	WT	WT	WT	WT	WT	WT	WT	C2637S	WT	WT	WT	WT	WT	WT	WT	WT	WT	WT	WT	WT	WT	WT	WT	WT	WT	WT	WT	WT	WT	WT	WT	WT	WT	WT	WT	WT
coadread_dfci_2016	coadread_dfci_2016_3527	WT	M1?	WT	WT	WT	WT	WT	WT	WT	WT	WT	WT	WT	WT	WT	WT	WT	WT	WT	WT	WT	WT	WT	WT	WT	WT	WT	V2527M	WT	WT	WT	WT	WT	WT	WT	WT	WT	WT	WT	WT	WT	WT	WT	WT	WT	WT	WT	WT
coadread_dfci_2016	coadread_dfci_2016_3650	WT	WT	WT	WT	WT	WT	R1405H	WT	WT	WT	WT	WT	WT	WT	WT	WT	WT	WT	WT	WT	WT	WT	WT	WT	WT	WT	WT	WT	WT	WT	WT	WT	WT	WT	WT	WT	WT	WT	WT	WT	WT	WT	WT	WT	WT	WT	WT	WT
coadread_tcga	TCGA-AA-3819-01	WT	WT	WT	WT	WT	WT	WT	WT	WT	WT	WT	WT	WT	WT	N2157Y	WT	F3734L	WT	WT	WT	WT	WT	WT	WT	WT	WT	WT	WT	N919K	WT	WT	WT	WT	WT	WT	WT	WT	WT	WT	WT	WT	WT	WT	WT	WT	WT	WT	WT
coadread_dfci_2016	coadread_dfci_2016_237969	WT	WT	WT	WT	WT	WT	WT	WT	WT	WT	WT	WT	WT	R3418H	WT	WT	WT	WT	WT	WT	WT	WT	WT	WT	WT	WT	WT	WT	WT	WT	WT	WT	WT	WT	WT	WT	WT	WT	WT	V529A	WT	WT	WT	WT	WT	WT	WT	WT
coadread_dfci_2016	coadread_dfci_2016_110220	WT	WT	WT	WT	WT	WT	WT	WT	WT	WT	WT	V1893I	WT	WT	WT	A792E	WT	WT	WT	WT	WT	WT	WT	WT	WT	WT	WT	WT	WT	WT	WT	WT	WT	WT	WT	WT	WT	WT	WT	WT	WT	R1725C	WT	WT	WT	WT	WT	WT
coadread_dfci_2016	coadread_dfci_2016_3665	WT	WT	WT	WT	WT	WT	WT	WT	WT	A748T	F3574C	WT	WT	WT	WT	WT	WT	WT	WT	WT	WT	WT	WT	WT	WT	WT	S1319N	WT	WT	WT	WT	WT	WT	WT	WT	WT	WT	WT	WT	WT	V591I	WT	WT	WT	WT	WT	WT	WT
coadread_dfci_2016	coadread_dfci_2016_2366	WT	WT	WT	WT	WT	WT	WT	WT	WT	WT	WT	T2354M	WT	WT	WT	WT	WT	WT	WT	WT	WT	WT	WT	WT	WT	WT	WT	WT	WT	WT	WT	WT	WT	WT	WT	WT	WT	T1394M	WT	WT	WT	WT	WT	WT	WT	WT	WT	WT
coadread_dfci_2016	coadread_dfci_2016_3099	WT	WT	WT	H494Q	WT	WT	WT	WT	WT	WT	WT	WT	WT	WT	WT	WT	WT	WT	WT	WT	WT	WT	WT	WT	S3000Y	WT	WT	WT	WT	S119R	WT	WT	WT	WT	WT	WT	WT	WT	WT	WT	WT	WT	WT	WT	WT	WT	WT	WT
coadread_dfci_2016	coadread_dfci_2016_3209	WT	WT	WT	R1005W	WT	WT	WT	WT	WT	WT	WT	WT	WT	WT	WT	WT	WT	WT	WT	WT	WT	WT	WT	WT	WT	WT	WT	WT	WT	WT	WT	WT	WT	WT	WT	WT	T894M	WT	WT	WT	WT	WT	WT	WT	WT	WT	WT	WT
coadread_dfci_2016	coadread_dfci_2016_1771	WT	WT	WT	WT	WT	WT	WT	WT	WT	WT	WT	WT	WT	WT	WT	V567M	WT	WT	WT	WT	WT	WT	WT	WT	WT	WT	WT	WT	WT	WT	WT	WT	WT	WT	WT	WT	WT	WT	WT	WT	WT	WT	WT	P225T	WT	WT	WT	WT
coadread_dfci_2016	coadread_dfci_2016_1191	WT	WT	C1220S	WT	WT	WT	WT	WT	WT	WT	F3574L	WT	WT	WT	WT	WT	WT	WT	WT	WT	WT	WT	WT	WT	WT	WT	WT	WT	WT	WT	WT	WT	WT	WT	WT	WT	WT	WT	WT	WT	WT	WT	WT	WT	WT	WT	WT	WT
coadread_dfci_2016	coadread_dfci_2016_231	WT	WT	WT	WT	WT	WT	WT	WT	WT	WT	WT	WT	WT	WT	WT	WT	WT	WT	WT	WT	WT	WT	WT	WT	WT	WT	WT	WT	WT	WT	WT	WT	WT	WT	WT	WT	WT	WT	WT	WT	WT	WT	WT	WT	WT	WT	WT	WT
coadread_dfci_2016	coadread_dfci_2016_2926	WT	WT	WT	WT	WT	WT	WT	WT	WT	WT	WT	WT	WT	WT	WT	G901R	WT	WT	WT	WT	WT	WT	WT	WT	WT	WT	WT	WT	WT	WT	WT	WT	WT	WT	WT	WT	WT	WT	WT	WT	WT	WT	WT	G341V	WT	WT	WT	WT
coadread_dfci_2016	coadread_dfci_2016_587	WT	WT	WT	WT	WT	WT	WT	WT	WT	WT	WT	WT	WT	WT	WT	WT	WT	WT	WT	WT	WT	WT	WT	R474H	WT	WT	WT	WT	WT	WT	WT	WT	WT	WT	WT	WT	WT	WT	WT	WT	WT	WT	WT	WT	WT	WT	R3496L	WT
coadread_dfci_2016	coadread_dfci_2016_2367	WT	WT	WT	P645L	WT	WT	WT	WT	WT	WT	WT	WT	WT	WT	WT	WT	WT	WT	WT	WT	WT	WT	WT	WT	WT	WT	WT	WT	WT	WT	WT	WT	WT	WT	WT	WT	WT	WT	WT	WT	WT	WT	WT	WT	WT	H1719Y H1719L	WT	WT
coadread_dfci_2016	coadread_dfci_2016_32	WT	WT	WT	WT	WT	WT	WT	WT	WT	WT	WT	WT	WT	WT	WT	WT	WT	WT	WT	WT	WT	WT	WT	WT	WT	WT	WT	WT	WT	WT	WT	WT	WT	WT	WT	WT	WT	WT	WT	WT	WT	WT	WT	WT	WT	WT	WT	WT
coadread_dfci_2016	coadread_dfci_2016_22	WT	WT	WT	WT	WT	WT	WT	WT	WT	WT	WT	WT	WT	WT	WT	WT	WT	WT	WT	WT	WT	WT	WT	WT	WT	WT	WT	WT	WT	WT	WT	WT	WT	WT	WT	WT	WT	WT	WT	WT	WT	WT	WT	WT	R288W	WT	WT	WT
coadread_dfci_2016	coadread_dfci_2016_2935	WT	WT	WT	WT	WT	WT	WT	WT	R1222Q	WT	WT	WT	G2681S	WT	WT	WT	WT	WT	WT	WT	WT	WT	WT	WT	WT	WT	WT	WT	WT	WT	WT	WT	P1374S	WT	WT	WT	WT	WT	WT	WT	WT	WT	WT	WT	WT	WT	WT	WT
coadread_dfci_2016	coadread_dfci_2016_101	WT	R894C	WT	WT	WT	WT	WT	WT	WT	WT	E1390K	WT	WT	WT	WT	WT	WT	WT	WT	WT	WT	WT	WT	WT	WT	WT	WT	V1350M	WT	WT	WT	WT	WT	WT	WT	WT	WT	WT	WT	WT	WT	WT	WT	WT	WT	WT	WT	WT
coadread_dfci_2016	coadread_dfci_2016_3698	WT	WT	WT	WT	WT	R2603Q	WT	WT	WT	WT	WT	WT	WT	WT	WT	WT	WT	WT	WT	WT	WT	WT	WT	WT	WT	WT	WT	WT	WT	WT	WT	WT	WT	WT	WT	WT	WT	WT	WT	WT	WT	WT	WT	WT	WT	WT	WT	WT
coadread_dfci_2016	coadread_dfci_2016_3683	WT	WT	WT	WT	WT	WT	A1062D	WT	WT	WT	WT	WT	WT	WT	WT	WT	WT	WT	WT	WT	WT	WT	WT	WT	WT	WT	WT	WT	WT	WT	WT	WT	WT	P1622L	WT	WT	WT	WT	WT	WT	WT	WT	WT	WT	WT	WT	WT	WT
coadread_dfci_2016	coadread_dfci_2016_631	WT	WT	WT	WT	WT	E3272K	WT	WT	WT	WT	WT	WT	WT	R3435C	WT	WT	WT	WT	WT	WT	WT	WT	WT	WT	WT	WT	WT	WT	WT	WT	WT	WT	WT	WT	WT	WT	WT	WT	WT	WT	WT	WT	WT	WT	WT	WT	WT	WT
coadread_dfci_2016	coadread_dfci_2016_3692	WT	WT	WT	WT	WT	WT	WT	WT	WT	WT	WT	WT	WT	WT	WT	WT	WT	WT	WT	WT	WT	WT	WT	WT	WT	WT	WT	WT	WT	WT	WT	WT	WT	WT	WT	WT	WT	WT	WT	WT	WT	WT	WT	WT	WT	WT	WT	WT
coadread_dfci_2016	coadread_dfci_2016_657	WT	WT	WT	WT	WT	WT	WT	WT	WT	WT	WT	WT	WT	WT	WT	WT	WT	WT	WT	WT	WT	WT	WT	WT	WT	WT	WT	WT	WT	WT	WT	WT	WT	WT	WT	WT	WT	WT	WT	WT	WT	WT	WT	WT	WT	WT	WT	N4891H
coadread_dfci_2016	coadread_dfci_2016_241681	WT	WT	I1593M	WT	WT	WT	WT	WT	WT	WT	WT	WT	WT	WT	WT	WT	WT	WT	WT	WT	WT	WT	WT	WT	WT	WT	WT	WT	WT	WT	WT	WT	WT	WT	WT	WT	WT	WT	WT	WT	WT	WT	WT	WT	WT	V806I	WT	WT
coadread_dfci_2016	coadread_dfci_2016_1195	WT	WT	WT	WT	WT	WT	WT	WT	WT	WT	WT	WT	WT	WT	WT	WT	WT	WT	WT	WT	WT	WT	WT	WT	WT	WT	WT	WT	D132N	WT	WT	WT	WT	WT	WT	WT	WT	WT	WT	WT	WT	WT	WT	WT	WT	WT	WT	WT
coadread_dfci_2016	coadread_dfci_2016_3398	WT	WT	WT	WT	WT	WT	WT	WT	WT	WT	WT	WT	WT	WT	WT	WT	WT	WT	WT	WT	WT	WT	WT	WT	WT	WT	WT	WT	WT	V2103I	WT	R2319Q	WT	WT	R1196W	R1437C	WT	A544V	WT	WT	WT	WT	WT	WT	WT	WT	WT	WT
coadread_dfci_2016	coadread_dfci_2016_3267	WT	WT	WT	WT	WT	R3498H	WT	WT	WT	WT	WT	WT	WT	WT	WT	WT	WT	WT	WT	WT	WT	WT	WT	WT	WT	WT	WT	WT	WT	WT	WT	WT	WT	WT	WT	WT	WT	WT	A745V	WT	WT	WT	WT	WT	WT	WT	WT	WT
coadread_dfci_2016	coadread_dfci_2016_3046	WT	WT	WT	WT	WT	WT	WT	WT	WT	WT	WT	WT	WT	WT	WT	WT	WT	WT	WT	WT	WT	WT	WT	WT	WT	WT	WT	N3633S	WT	WT	WT	WT	WT	WT	WT	WT	WT	WT	WT	WT	WT	F1082L	WT	WT	WT	WT	WT	WT
coadread_dfci_2016	coadread_dfci_2016_3144	WT	WT	WT	WT	WT	WT	WT	WT	WT	WT	D4136N	WT	WT	WT	WT	WT	WT	WT	WT	WT	WT	WT	WT	WT	WT	WT	WT	WT	WT	WT	WT	WT	WT	WT	WT	WT	WT	WT	WT	WT	WT	WT	WT	WT	WT	WT	WT	WT
coadread_dfci_2016	coadread_dfci_2016_2429	WT	WT	WT	WT	WT	WT	WT	WT	WT	WT	WT	WT	WT	WT	WT	WT	WT	WT	WT	WT	WT	WT	WT	WT	WT	WT	D521Y	WT	WT	WT	WT	WT	WT	WT	WT	WT	WT	WT	WT	WT	A872T	WT	WT	WT	WT	WT	WT	WT
coadread_dfci_2016	coadread_dfci_2016_649	WT	WT	M1769T	WT	WT	WT	WT	WT	WT	WT	WT	WT	WT	WT	WT	WT	WT	WT	WT	WT	WT	WT	WT	WT	WT	WT	WT	WT	Q1624*	WT	WT	WT	WT	WT	WT	WT	WT	WT	WT	WT	WT	WT	WT	R900W	WT	WT	WT	WT
coadread_dfci_2016	coadread_dfci_2016_3335	WT	WT	WT	WT	WT	WT	WT	WT	WT	WT	WT	WT	R529W	WT	WT	WT	WT	WT	R3652W	WT	WT	WT	WT	WT	WT	WT	WT	WT	WT	WT	WT	WT	WT	WT	WT	WT	WT	WT	WT	WT	WT	WT	WT	WT	WT	WT	WT	WT
coadread_dfci_2016	coadread_dfci_2016_475	WT	WT	WT	WT	WT	WT	WT	WT	WT	WT	WT	WT	WT	WT	WT	WT	WT	WT	WT	WT	WT	WT	WT	WT	WT	WT	WT	WT	WT	WT	WT	WT	WT	WT	WT	P596Q	WT	WT	G735R	WT	WT	WT	WT	WT	WT	V726I	WT	WT
coadread_dfci_2016	coadread_dfci_2016_3637	WT	WT	WT	WT	WT	WT	WT	WT	WT	WT	WT	WT	WT	WT	WT	WT	WT	WT	WT	WT	WT	WT	WT	WT	WT	WT	WT	WT	WT	WT	WT	WT	WT	WT	WT	WT	WT	WT	WT	T1438=	WT	WT	WT	WT	WT	WT	WT	WT
coadread_dfci_2016	coadread_dfci_2016_521	WT	WT	WT	WT	WT	WT	WT	WT	WT	WT	WT	WT	WT	WT	WT	WT	WT	WT	WT	WT	WT	WT	WT	WT	WT	WT	WT	WT	WT	WT	WT	WT	WT	WT	WT	WT	WT	R436Q	WT	WT	WT	WT	WT	WT	WT	WT	WT	WT
coadread_tcga	TCGA-AA-3664-01	WT	WT	WT	WT	WT	WT	WT	WT	WT	WT	WT	WT	WT	WT	WT	T151M	WT	WT	WT	WT	WT	WT	WT	WT	Q1603K	WT	WT	WT	WT	WT	WT	WT	WT	WT	WT	WT	WT	WT	WT	D820N	WT	WT	WT	WT	WT	WT	WT	WT
coadread_dfci_2016	coadread_dfci_2016_298012	WT	WT	WT	WT	WT	WT	WT	WT	WT	WT	WT	WT	WT	WT	WT	WT	WT	WT	WT	WT	WT	WT	WT	WT	WT	WT	WT	WT	WT	WT	WT	WT	WT	WT	WT	WT	WT	WT	WT	WT	WT	WT	WT	WT	WT	WT	WT	WT
coadread_dfci_2016	coadread_dfci_2016_2766	WT	WT	WT	WT	WT	WT	WT	WT	WT	WT	WT	WT	WT	WT	WT	WT	WT	WT	WT	WT	WT	WT	WT	WT	WT	WT	WT	WT	WT	WT	WT	WT	WT	WT	G1702S	WT	WT	A361T	WT	WT	WT	WT	WT	WT	WT	WT	WT	WT
coadread_dfci_2016	coadread_dfci_2016_2279	WT	WT	WT	WT	WT	P2315L	WT	WT	WT	R632Q	WT	WT	WT	WT	WT	WT	WT	WT	WT	WT	WT	WT	WT	WT	WT	P1996L	WT	WT	WT	WT	WT	WT	WT	WT	WT	WT	WT	WT	WT	WT	WT	WT	WT	WT	WT	WT	WT	WT
coadread_dfci_2016	coadread_dfci_2016_2647	WT	WT	WT	WT	WT	WT	WT	WT	WT	R1650*	WT	WT	WT	WT	WT	WT	WT	WT	WT	WT	WT	WT	WT	WT	WT	WT	E759K	WT	WT	WT	WT	WT	WT	WT	WT	WT	WT	S2641F	WT	WT	A2557T	WT	WT	WT	WT	WT	WT	WT
coadread_dfci_2016	coadread_dfci_2016_330	WT	WT	WT	WT	WT	WT	WT	WT	WT	WT	WT	E993Gfs*30	WT	WT	WT	WT	WT	WT	WT	WT	WT	WT	WT	WT	WT	WT	WT	WT	WT	WT	WT	WT	WT	WT	WT	WT	WT	WT	WT	WT	WT	WT	WT	WT	WT	WT	WT	WT
coadread_dfci_2016	coadread_dfci_2016_237641	WT	WT	WT	WT	WT	WT	WT	WT	WT	WT	WT	WT	WT	G4024D	WT	WT	WT	WT	WT	WT	WT	WT	WT	WT	WT	WT	WT	WT	WT	WT	WT	WT	WT	WT	WT	WT	WT	WT	WT	WT	WT	WT	WT	WT	WT	WT	WT	E1014K
coadread_dfci_2016	coadread_dfci_2016_645	WT	WT	WT	WT	WT	WT	WT	WT	WT	WT	WT	WT	WT	WT	WT	WT	WT	WT	WT	WT	WT	WT	WT	WT	WT	WT	WT	WT	WT	WT	WT	WT	WT	WT	WT	WT	WT	WT	WT	WT	WT	WT	WT	WT	WT	WT	WT	WT
coadread_dfci_2016	coadread_dfci_2016_519	WT	WT	WT	WT	WT	WT	WT	WT	WT	WT	WT	WT	WT	WT	WT	WT	WT	WT	WT	WT	WT	WT	WT	WT	WT	WT	WT	WT	WT	N2493D	WT	WT	WT	WT	WT	WT	WT	WT	WT	WT	WT	WT	WT	WT	T1025N	WT	WT	WT
coadread_dfci_2016	coadread_dfci_2016_3431	WT	WT	WT	WT	WT	WT	WT	WT	WT	WT	WT	WT	WT	WT	X3588_splice	WT	WT	WT	WT	WT	WT	WT	WT	WT	WT	WT	WT	WT	WT	WT	WT	WT	E878K	WT	WT	WT	WT	WT	WT	WT	WT	WT	WT	WT	WT	WT	WT	WT
coadread_dfci_2016	coadread_dfci_2016_1185	WT	WT	WT	WT	WT	X2988_splice	WT	WT	WT	WT	WT	WT	WT	WT	WT	WT	WT	WT	WT	WT	WT	WT	WT	WT	WT	WT	WT	WT	WT	WT	WT	WT	WT	WT	WT	WT	WT	WT	WT	WT	WT	WT	WT	WT	WT	WT	WT	WT
coadread_dfci_2016	coadread_dfci_2016_2948	WT	WT	WT	WT	E2270V	WT	WT	WT	WT	WT	WT	WT	WT	WT	WT	WT	WT	WT	WT	WT	WT	WT	WT	WT	WT	WT	WT	WT	WT	WT	WT	WT	WT	WT	WT	WT	WT	WT	WT	WT	WT	WT	WT	WT	WT	WT	WT	WT
coadread_dfci_2016	coadread_dfci_2016_365383	WT	WT	WT	WT	WT	WT	WT	WT	WT	WT	WT	WT	WT	WT	WT	WT	WT	WT	WT	WT	WT	WT	WT	WT	WT	WT	WT	WT	WT	L882F	WT	WT	WT	WT	WT	WT	WT	WT	WT	WT	WT	WT	WT	WT	WT	WT	WT	WT
coadread_dfci_2016	coadread_dfci_2016_2957	WT	WT	WT	WT	WT	WT	WT	WT	WT	WT	WT	WT	WT	WT	WT	WT	WT	R1575C	WT	WT	WT	WT	WT	WT	WT	WT	WT	WT	WT	WT	WT	WT	WT	WT	WT	WT	WT	WT	WT	WT	WT	WT	WT	WT	WT	WT	WT	WT
coadread_dfci_2016	coadread_dfci_2016_18	WT	WT	WT	WT	WT	WT	WT	WT	WT	R152*	WT	WT	WT	WT	WT	WT	WT	WT	WT	WT	WT	WT	WT	WT	WT	WT	WT	WT	WT	WT	WT	WT	WT	R695K	WT	WT	WT	WT	WT	WT	WT	WT	WT	WT	WT	WT	WT	WT
coadread_dfci_2016	coadread_dfci_2016_1190	WT	WT	WT	WT	WT	WT	WT	WT	WT	WT	WT	WT	WT	WT	WT	WT	WT	G100D	WT	WT	WT	WT	WT	WT	WT	WT	WT	WT	WT	WT	WT	WT	WT	WT	WT	WT	WT	WT	WT	WT	WT	WT	WT	WT	WT	WT	WT	WT
coadread_dfci_2016	coadread_dfci_2016_3484	WT	WT	WT	WT	WT	WT	WT	WT	WT	WT	WT	WT	WT	WT	WT	WT	WT	WT	WT	WT	WT	WT	WT	WT	WT	WT	WT	WT	WT	WT	WT	WT	WT	WT	WT	WT	WT	WT	WT	WT	WT	WT	WT	WT	WT	WT	WT	WT
coadread_dfci_2016	coadread_dfci_2016_66	WT	WT	WT	WT	R2297Q	WT	WT	WT	WT	WT	WT	WT	WT	WT	WT	WT	WT	WT	WT	WT	WT	WT	WT	WT	WT	WT	WT	WT	WT	WT	WT	WT	WT	WT	WT	WT	WT	WT	WT	WT	WT	WT	WT	WT	WT	WT	WT	WT
coadread_dfci_2016	coadread_dfci_2016_2454	WT	WT	WT	WT	WT	WT	WT	A1885G	R3421Q S1237L	WT	WT	WT	WT	WT	WT	WT	WT	WT	WT	WT	WT	WT	WT	WT	WT	WT	WT	WT	WT	WT	WT	WT	WT	WT	WT	WT	WT	WT	WT	WT	WT	WT	V1521M	WT	G172D	WT	WT	WT
coadread_dfci_2016	coadread_dfci_2016_3601	WT	WT	WT	WT	WT	WT	WT	WT	WT	WT	WT	WT	WT	WT	WT	WT	WT	WT	WT	WT	WT	WT	WT	WT	WT	WT	WT	WT	WT	WT	WT	WT	WT	WT	R1372H	R349H	WT	WT	WT	WT	WT	WT	WT	WT	WT	WT	WT	WT
coadread_dfci_2016	coadread_dfci_2016_240	WT	WT	WT	WT	WT	WT	WT	WT	WT	WT	WT	WT	WT	WT	WT	WT	WT	WT	WT	WT	WT	WT	WT	WT	D365N	WT	WT	WT	WT	WT	WT	WT	WT	WT	WT	WT	WT	WT	WT	WT	WT	WT	WT	WT	WT	WT	WT	WT
coadread_dfci_2016	coadread_dfci_2016_3405	WT	WT	WT	WT	WT	WT	WT	WT	WT	WT	WT	WT	WT	WT	WT	WT	WT	R937Q	WT	WT	WT	WT	WT	WT	WT	WT	WT	WT	WT	WT	WT	WT	WT	R1853H	WT	WT	WT	WT	WT	WT	WT	WT	WT	WT	WT	WT	WT	WT
coadread_dfci_2016	coadread_dfci_2016_3227	WT	WT	WT	WT	A2349V	WT	WT	WT	WT	WT	WT	WT	WT	WT	WT	WT	WT	WT	WT	WT	WT	WT	R50W	WT	WT	WT	WT	WT	WT	WT	WT	WT	WT	WT	WT	WT	WT	WT	WT	WT	V2012M	WT	WT	WT	WT	WT	WT	WT
coadread_dfci_2016	coadread_dfci_2016_1167	WT	WT	WT	WT	WT	WT	WT	WT	WT	WT	WT	WT	WT	WT	WT	WT	WT	WT	WT	WT	WT	WT	WT	WT	WT	WT	WT	WT	WT	WT	WT	WT	WT	S277T	WT	WT	R1900C	WT	WT	WT	WT	WT	WT	WT	WT	WT	WT	WT
coadread_dfci_2016	coadread_dfci_2016_4519	WT	WT	WT	WT	WT	WT	WT	WT	WT	WT	WT	WT	WT	WT	WT	WT	WT	WT	WT	WT	WT	WT	WT	WT	WT	WT	WT	WT	WT	WT	WT	WT	WT	WT	WT	WT	WT	WT	WT	WT	WT	WT	WT	WT	WT	WT	WT	WT
coadread_dfci_2016	coadread_dfci_2016_3509	WT	WT	WT	WT	WT	WT	T301M	WT	WT	WT	WT	WT	WT	WT	WT	WT	WT	WT	WT	WT	WT	WT	WT	WT	WT	WT	WT	WT	WT	WT	WT	WT	WT	WT	WT	WT	WT	WT	WT	WT	WT	WT	WT	P141L	WT	WT	WT	WT
coadread_dfci_2016	coadread_dfci_2016_464	WT	WT	WT	WT	WT	WT	WT	WT	WT	WT	WT	WT	WT	WT	WT	WT	WT	WT	WT	WT	WT	WT	WT	WT	WT	WT	WT	WT	WT	WT	WT	WT	WT	WT	WT	WT	WT	WT	WT	WT	WT	WT	WT	WT	WT	WT	WT	WT
coadread_dfci_2016	coadread_dfci_2016_1165	WT	WT	WT	WT	WT	WT	WT	WT	WT	WT	WT	WT	WT	WT	WT	WT	WT	WT	WT	WT	WT	WT	WT	WT	WT	WT	WT	WT	WT	WT	WT	WT	WT	WT	WT	WT	WT	WT	WT	WT	WT	WT	WT	WT	WT	WT	WT	WT
coadread_dfci_2016	coadread_dfci_2016_108	WT	WT	WT	WT	WT	WT	WT	WT	WT	WT	WT	WT	WT	WT	WT	WT	WT	WT	WT	WT	WT	WT	WT	T562M	WT	WT	WT	WT	WT	WT	WT	WT	WT	WT	WT	WT	WT	WT	WT	WT	WT	WT	WT	WT	WT	WT	WT	WT
coadread_dfci_2016	coadread_dfci_2016_180077	WT	WT	WT	WT	WT	WT	WT	WT	WT	WT	WT	WT	WT	WT	WT	WT	WT	WT	WT	WT	WT	WT	WT	WT	WT	WT	WT	WT	WT	WT	WT	WT	WT	WT	WT	WT	WT	WT	WT	WT	WT	WT	WT	WT	WT	WT	WT	WT
coadread_dfci_2016	coadread_dfci_2016_346942	WT	WT	WT	WT	WT	WT	WT	WT	WT	WT	WT	WT	WT	WT	WT	WT	WT	WT	WT	WT	WT	WT	WT	WT	WT	WT	WT	WT	WT	WT	WT	WT	WT	WT	WT	WT	WT	WT	WT	WT	WT	D455N	WT	WT	WT	WT	WT	WT
coadread_dfci_2016	coadread_dfci_2016_3558	WT	WT	WT	WT	WT	WT	WT	WT	WT	WT	WT	R455W	WT	WT	WT	WT	K1040Q	WT	WT	WT	WT	WT	WT	WT	WT	WT	WT	WT	WT	WT	WT	WT	WT	WT	WT	WT	WT	WT	WT	WT	WT	WT	WT	WT	WT	WT	WT	WT
coadread_dfci_2016	coadread_dfci_2016_429	S47*	R894C	WT	WT	WT	WT	WT	WT	WT	WT	WT	T1019A	WT	WT	WT	WT	WT	WT	WT	WT	WT	WT	WT	WT	WT	WT	WT	WT	WT	WT	WT	WT	WT	WT	WT	P625R	WT	WT	WT	WT	WT	WT	WT	WT	WT	WT	WT	WT
coadread_dfci_2016	coadread_dfci_2016_391	WT	WT	WT	WT	WT	WT	WT	WT	WT	WT	WT	T607M	WT	WT	WT	WT	WT	WT	WT	WT	WT	Y338N	WT	WT	WT	WT	WT	WT	WT	WT	WT	WT	WT	WT	WT	WT	R1900C	WT	WT	WT	WT	WT	WT	WT	WT	WT	WT	WT
coadread_dfci_2016	coadread_dfci_2016_496	WT	WT	WT	WT	WT	WT	WT	WT	WT	WT	WT	WT	WT	WT	WT	WT	WT	WT	WT	WT	WT	WT	WT	WT	WT	WT	L617F	WT	WT	WT	V1344M	WT	P1123S	WT	WT	WT	WT	WT	WT	WT	WT	WT	WT	WT	WT	WT	WT	WT
coadread_dfci_2016	coadread_dfci_2016_461	WT	WT	WT	WT	WT	S521R	WT	WT	WT	WT	WT	WT	WT	WT	WT	WT	WT	WT	WT	N447S	WT	WT	WT	WT	L1616*	WT	WT	WT	A787T	WT	WT	WT	WT	R1814Q	WT	WT	WT	WT	WT	WT	WT	WT	WT	WT	WT	WT	WT	WT
coadread_dfci_2016	coadread_dfci_2016_2568	WT	WT	WT	WT	WT	WT	WT	WT	WT	WT	WT	WT	WT	L2590M	L2046V	WT	WT	WT	WT	WT	WT	WT	WT	WT	WT	WT	M54L	WT	WT	WT	WT	WT	R105C	WT	WT	WT	WT	WT	WT	WT	WT	WT	WT	WT	WT	WT	WT	WT
coadread_dfci_2016	coadread_dfci_2016_3340	WT	WT	WT	WT	WT	WT	WT	WT	WT	WT	WT	WT	WT	WT	WT	WT	E675*	WT	WT	WT	WT	WT	WT	WT	WT	WT	WT	WT	WT	WT	WT	WT	WT	WT	R1154*	WT	WT	WT	WT	WT	WT	WT	WT	WT	WT	WT	WT	WT
coadread_dfci_2016	coadread_dfci_2016_2270	WT	WT	WT	WT	WT	WT	WT	WT	WT	WT	WT	WT	WT	WT	WT	WT	WT	WT	WT	WT	WT	WT	WT	WT	WT	WT	WT	WT	WT	WT	WT	WT	WT	WT	WT	WT	WT	WT	WT	WT	WT	WT	WT	WT	WT	WT	WT	WT
coadread_dfci_2016	coadread_dfci_2016_251808	WT	WT	Y5099*	WT	WT	WT	WT	WT	WT	WT	WT	WT	WT	WT	WT	WT	WT	R1759H	WT	WT	WT	WT	WT	WT	WT	WT	WT	WT	WT	WT	WT	WT	WT	WT	WT	WT	WT	WT	WT	T2957M	WT	WT	WT	WT	WT	WT	WT	WT
coadread_dfci_2016	coadread_dfci_2016_2664	WT	WT	WT	WT	WT	WT	WT	WT	WT	WT	WT	WT	WT	WT	WT	WT	WT	WT	WT	WT	WT	WT	E1863G	D1844V	WT	WT	WT	WT	WT	WT	WT	WT	WT	WT	WT	WT	WT	WT	WT	WT	WT	WT	WT	WT	WT	WT	WT	WT
coadread_dfci_2016	coadread_dfci_2016_378	WT	WT	WT	WT	WT	WT	WT	WT	WT	WT	WT	WT	WT	WT	WT	WT	WT	WT	WT	WT	WT	WT	WT	WT	WT	WT	WT	WT	WT	WT	WT	WT	WT	WT	WT	WT	WT	WT	WT	WT	WT	WT	WT	WT	WT	WT	WT	WT
coadread_dfci_2016	coadread_dfci_2016_3528	WT	WT	WT	WT	WT	WT	WT	WT	WT	R93W	WT	WT	WT	WT	WT	WT	WT	WT	WT	WT	WT	WT	WT	WT	WT	WT	WT	WT	WT	WT	WT	WT	WT	WT	WT	WT	WT	WT	WT	WT	WT	WT	WT	R266C	WT	WT	WT	WT
coadread_dfci_2016	coadread_dfci_2016_2458	WT	WT	WT	WT	WT	WT	WT	WT	WT	WT	WT	WT	WT	V1638M	WT	A62T	WT	WT	WT	WT	WT	WT	WT	WT	WT	WT	WT	WT	WT	WT	R1027C	WT	WT	WT	A1377V	WT	WT	WT	N513I	WT	WT	WT	WT	WT	WT	WT	WT	WT
coadread_dfci_2016	coadread_dfci_2016_3670	WT	WT	WT	WT	WT	WT	WT	WT	WT	WT	V2923M	WT	WT	WT	WT	WT	WT	WT	WT	WT	WT	WT	WT	WT	WT	WT	WT	WT	Q860K	WT	WT	WT	WT	WT	WT	WT	WT	WT	WT	WT	WT	WT	WT	WT	WT	WT	WT	WT
coadread_dfci_2016	coadread_dfci_2016_171816	WT	WT	WT	WT	WT	WT	WT	WT	WT	WT	WT	WT	WT	WT	WT	WT	WT	WT	WT	WT	WT	WT	WT	WT	WT	WT	WT	WT	WT	WT	WT	WT	WT	WT	WT	WT	WT	WT	WT	WT	WT	WT	WT	WT	WT	WT	WT	WT
coadread_dfci_2016	coadread_dfci_2016_3260	WT	WT	WT	WT	WT	WT	WT	WT	WT	WT	WT	WT	WT	WT	WT	WT	WT	WT	WT	WT	WT	WT	WT	WT	WT	WT	WT	WT	WT	WT	WT	WT	WT	WT	WT	WT	WT	WT	WT	WT	WT	WT	WT	WT	WT	WT	WT	WT
coadread_dfci_2016	coadread_dfci_2016_640	WT	WT	WT	WT	WT	WT	WT	WT	L6732M	WT	WT	WT	WT	WT	WT	WT	WT	WT	WT	WT	WT	WT	WT	WT	WT	WT	WT	WT	WT	WT	WT	WT	WT	WT	WT	WT	WT	WT	WT	WT	WT	WT	WT	WT	WT	WT	WT	WT
coadread_dfci_2016	coadread_dfci_2016_3678	WT	WT	WT	WT	WT	WT	WT	WT	WT	WT	WT	WT	WT	WT	WT	WT	WT	WT	WT	WT	WT	WT	WT	WT	WT	WT	WT	WT	WT	WT	WT	WT	WT	WT	WT	WT	WT	WT	WT	WT	X1585_splice	WT	WT	WT	WT	WT	WT	WT
coadread_dfci_2016	coadread_dfci_2016_308390	T91N	WT	WT	WT	WT	WT	WT	WT	WT	WT	WT	WT	WT	WT	WT	WT	WT	WT	WT	WT	WT	WT	WT	WT	WT	WT	WT	WT	WT	WT	WT	WT	WT	WT	WT	WT	WT	WT	WT	WT	WT	WT	WT	WT	WT	WT	WT	WT
coadread_dfci_2016	coadread_dfci_2016_311196	WT	WT	WT	WT	WT	WT	WT	WT	WT	WT	WT	WT	WT	WT	WT	WT	WT	WT	WT	WT	WT	WT	WT	WT	WT	WT	WT	WT	WT	WT	WT	WT	WT	WT	WT	WT	WT	WT	WT	WT	WT	WT	WT	WT	WT	WT	WT	WT
coadread_tcga	TCGA-AA-A02Y-01	WT	WT	WT	WT	WT	WT	WT	WT	WT	WT	WT	WT	WT	WT	WT	WT	WT	WT	WT	WT	WT	WT	WT	WT	WT	WT	WT	WT	WT	Q264K	WT	WT	WT	WT	WT	WT	WT	WT	WT	WT	WT	WT	WT	T357N	WT	WT	WT	WT
coadread_dfci_2016	coadread_dfci_2016_1196	WT	WT	WT	WT	WT	WT	WT	WT	WT	WT	WT	WT	WT	WT	WT	WT	WT	WT	WT	WT	WT	WT	WT	WT	WT	WT	WT	WT	WT	WT	WT	WT	WT	WT	V233I	WT	WT	WT	WT	WT	WT	WT	WT	WT	WT	WT	WT	WT
coadread_dfci_2016	coadread_dfci_2016_2929	WT	WT	WT	WT	WT	WT	WT	WT	WT	WT	WT	WT	WT	WT	WT	WT	WT	WT	WT	WT	WT	WT	WT	WT	E1085D	WT	WT	WT	WT	WT	WT	WT	WT	WT	WT	WT	WT	WT	WT	WT	WT	WT	WT	WT	WT	WT	WT	WT
coadread_dfci_2016	coadread_dfci_2016_3309	WT	WT	WT	WT	WT	WT	WT	WT	WT	WT	WT	WT	WT	WT	WT	WT	WT	WT	WT	WT	WT	WT	WT	WT	WT	WT	WT	WT	WT	WT	WT	WT	WT	WT	WT	WT	WT	WT	WT	WT	WT	WT	WT	WT	WT	WT	WT	WT
coadread_dfci_2016	coadread_dfci_2016_4522	WT	WT	WT	WT	WT	WT	WT	WT	WT	WT	WT	WT	WT	WT	WT	WT	WT	WT	WT	I243V	WT	WT	WT	WT	WT	WT	WT	WT	WT	WT	WT	WT	WT	WT	WT	WT	WT	WT	WT	WT	WT	WT	WT	WT	WT	WT	WT	WT
coadread_dfci_2016	coadread_dfci_2016_2439	WT	WT	WT	WT	WT	WT	WT	WT	WT	WT	WT	WT	S1673N	WT	R1349C	WT	WT	WT	WT	WT	WT	WT	WT	WT	WT	WT	WT	WT	WT	WT	WT	WT	WT	WT	WT	WT	WT	WT	WT	WT	WT	WT	WT	WT	WT	WT	WT	WT
coadread_dfci_2016	coadread_dfci_2016_3726	WT	WT	WT	WT	WT	WT	WT	WT	WT	WT	WT	WT	WT	WT	WT	WT	WT	WT	WT	WT	WT	WT	WT	WT	WT	WT	WT	WT	WT	WT	WT	WT	WT	WT	WT	WT	WT	WT	WT	WT	WT	WT	WT	WT	WT	WT	WT	WT
coadread_dfci_2016	coadread_dfci_2016_3336	WT	WT	WT	WT	WT	WT	WT	Q1135*	WT	WT	WT	S1205R	WT	WT	WT	WT	WT	WT	WT	WT	WT	WT	WT	G651V	WT	WT	WT	WT	WT	WT	WT	WT	WT	WT	R56W	WT	WT	WT	WT	WT	WT	WT	WT	WT	WT	WT	WT	WT
coadread_dfci_2016	coadread_dfci_2016_3443	WT	WT	WT	WT	WT	WT	WT	WT	WT	WT	WT	WT	WT	WT	WT	WT	WT	WT	WT	WT	WT	WT	WT	WT	WT	WT	WT	WT	WT	WT	WT	WT	WT	WT	WT	WT	WT	WT	WT	WT	WT	WT	WT	WT	WT	WT	WT	WT
coadread_dfci_2016	coadread_dfci_2016_186	WT	WT	WT	WT	WT	WT	WT	WT	WT	WT	WT	WT	WT	WT	WT	WT	WT	WT	WT	WT	WT	WT	WT	WT	WT	WT	WT	WT	WT	WT	WT	WT	WT	WT	WT	WT	WT	WT	WT	WT	WT	WT	WT	WT	WT	WT	WT	WT
coadread_dfci_2016	coadread_dfci_2016_3167	WT	WT	WT	WT	WT	WT	WT	WT	WT	WT	WT	WT	WT	WT	WT	WT	WT	WT	WT	WT	WT	WT	WT	WT	WT	WT	WT	WT	WT	WT	WT	WT	WT	WT	WT	WT	WT	WT	WT	WT	WT	WT	WT	WT	WT	WT	WT	WT
coadread_dfci_2016	coadread_dfci_2016_2252	WT	WT	WT	WT	WT	WT	WT	WT	WT	WT	WT	WT	WT	WT	WT	WT	WT	WT	WT	WT	WT	WT	WT	WT	WT	WT	WT	WT	WT	WT	WT	WT	WT	WT	WT	WT	WT	WT	WT	WT	WT	WT	WT	WT	WT	WT	WT	WT
coadread_dfci_2016	coadread_dfci_2016_366793	WT	WT	WT	WT	WT	WT	WT	WT	WT	WT	WT	WT	WT	WT	WT	WT	WT	WT	WT	WT	WT	WT	X3281_splice	WT	WT	WT	WT	A2902P	WT	WT	WT	WT	WT	WT	WT	WT	WT	WT	WT	WT	WT	WT	WT	WT	WT	WT	WT	WT
coadread_dfci_2016	coadread_dfci_2016_229	WT	WT	WT	WT	WT	R1843*	WT	H905Y	R3298*	WT	WT	WT	WT	WT	WT	WT	WT	WT	WT	WT	WT	WT	WT	WT	WT	WT	WT	WT	WT	WT	WT	WT	WT	WT	WT	WT	WT	WT	WT	WT	WT	WT	WT	WT	WT	WT	WT	WT
coadread_dfci_2016	coadread_dfci_2016_3706	WT	WT	WT	WT	WT	WT	WT	WT	WT	WT	WT	WT	WT	WT	WT	WT	WT	WT	WT	WT	WT	WT	WT	WT	WT	WT	WT	WT	E613K	WT	WT	WT	WT	WT	WT	WT	WT	WT	WT	WT	WT	WT	WT	S991I	WT	WT	WT	WT
coadread_dfci_2016	coadread_dfci_2016_2582	WT	WT	WT	WT	WT	WT	WT	WT	WT	WT	WT	WT	WT	WT	WT	WT	WT	WT	WT	WT	WT	WT	WT	WT	WT	WT	WT	WT	WT	WT	WT	WT	WT	WT	WT	WT	WT	WT	WT	WT	WT	WT	WT	WT	WT	WT	WT	WT
coadread_dfci_2016	coadread_dfci_2016_2938	WT	WT	WT	WT	WT	WT	WT	WT	WT	WT	WT	WT	WT	WT	WT	WT	WT	WT	WT	WT	WT	T1097M	WT	WT	WT	WT	WT	WT	WT	WT	WT	WT	WT	WT	WT	WT	WT	WT	WT	WT	WT	WT	WT	WT	WT	WT	WT	WT
coadread_dfci_2016	coadread_dfci_2016_353622	WT	WT	WT	WT	WT	WT	L1300*	WT	WT	WT	WT	WT	WT	WT	WT	WT	WT	WT	D2582N	WT	WT	WT	WT	WT	WT	WT	D1194N	WT	WT	WT	WT	WT	WT	WT	WT	WT	WT	WT	WT	WT	WT	WT	WT	WT	WT	WT	WT	WT
coadread_dfci_2016	coadread_dfci_2016_183221	WT	WT	WT	WT	WT	WT	WT	WT	WT	WT	WT	WT	WT	WT	WT	WT	WT	WT	WT	WT	WT	WT	WT	WT	WT	WT	WT	WT	WT	WT	WT	WT	WT	WT	WT	WT	WT	WT	WT	WT	WT	WT	WT	WT	WT	WT	WT	WT
coadread_dfci_2016	coadread_dfci_2016_2959	WT	WT	WT	WT	WT	WT	WT	WT	WT	WT	WT	WT	WT	WT	WT	WT	WT	WT	WT	WT	WT	WT	WT	WT	WT	WT	WT	WT	WT	WT	WT	WT	WT	WT	WT	T1855M	WT	WT	WT	WT	WT	WT	T296M	WT	WT	WT	WT	WT
coadread_dfci_2016	coadread_dfci_2016_1183	WT	WT	WT	WT	WT	WT	WT	P932L	WT	WT	WT	WT	WT	WT	WT	WT	WT	WT	WT	WT	WT	WT	WT	R767Q	WT	WT	WT	WT	WT	WT	WT	WT	WT	WT	WT	R1220Q	WT	WT	WT	WT	WT	WT	WT	WT	WT	WT	WT	WT
coadread_dfci_2016	coadread_dfci_2016_423	WT	WT	WT	WT	WT	WT	WT	WT	WT	WT	WT	WT	WT	WT	WT	WT	WT	WT	WT	WT	WT	WT	WT	WT	WT	WT	WT	WT	WT	WT	WT	WT	WT	WT	WT	WT	WT	WT	WT	WT	WT	WT	WT	WT	WT	A553V	WT	WT
coadread_dfci_2016	coadread_dfci_2016_2418	WT	WT	WT	WT	WT	WT	WT	WT	WT	WT	WT	WT	WT	WT	WT	WT	WT	WT	WT	WT	WT	WT	WT	V1010M	WT	WT	WT	D1349N	WT	WT	WT	WT	WT	WT	WT	WT	WT	WT	WT	WT	WT	WT	WT	WT	WT	WT	WT	WT
coadread_dfci_2016	coadread_dfci_2016_627	WT	WT	WT	WT	WT	WT	WT	WT	WT	WT	WT	WT	WT	WT	WT	D1204N	WT	WT	L86V	WT	WT	WT	WT	WT	WT	WT	WT	WT	WT	WT	WT	WT	L730I	WT	WT	WT	WT	WT	WT	WT	WT	WT	WT	WT	WT	WT	WT	WT
coadread_dfci_2016	coadread_dfci_2016_2398	WT	WT	WT	WT	WT	WT	WT	WT	WT	WT	WT	WT	WT	WT	WT	WT	WT	WT	WT	WT	WT	WT	WT	V449I	WT	WT	WT	WT	WT	WT	R2443W	WT	WT	WT	WT	WT	WT	WT	WT	WT	WT	WT	WT	WT	WT	WT	WT	WT
coadread_dfci_2016	coadread_dfci_2016_680	WT	WT	WT	WT	WT	WT	WT	WT	WT	WT	WT	WT	WT	WT	WT	WT	WT	WT	WT	WT	WT	WT	WT	WT	WT	WT	WT	WT	WT	WT	WT	WT	WT	WT	WT	WT	WT	WT	WT	WT	WT	WT	WT	WT	WT	WT	WT	WT
coadread_dfci_2016	coadread_dfci_2016_70	WT	WT	WT	WT	WT	WT	WT	WT	WT	WT	WT	WT	M2634V	WT	R1921C	WT	WT	WT	WT	WT	WT	WT	WT	WT	WT	WT	WT	D1409Y	WT	WT	WT	WT	WT	WT	WT	WT	WT	WT	WT	WT	WT	WT	WT	WT	WT	WT	WT	WT
coadread_dfci_2016	coadread_dfci_2016_3603	WT	WT	WT	WT	WT	WT	WT	WT	WT	R855Q	WT	WT	WT	WT	WT	WT	WT	WT	WT	WT	WT	WT	WT	WT	WT	WT	WT	WT	WT	WT	WT	WT	WT	WT	WT	WT	WT	WT	WT	WT	WT	G264S	WT	WT	WT	WT	WT	WT
coadread_dfci_2016	coadread_dfci_2016_3432	WT	WT	WT	WT	WT	WT	WT	WT	Q6302E	WT	WT	WT	WT	WT	WT	WT	WT	WT	WT	WT	WT	WT	WT	WT	WT	WT	WT	WT	WT	WT	WT	WT	WT	WT	WT	WT	WT	WT	WT	WT	WT	WT	WT	WT	WT	WT	WT	WT
coadread_dfci_2016	coadread_dfci_2016_348	WT	WT	WT	WT	WT	WT	WT	WT	WT	WT	WT	WT	WT	WT	WT	WT	WT	WT	WT	WT	WT	WT	WT	WT	WT	WT	WT	WT	WT	WT	WT	WT	WT	WT	WT	WT	WT	WT	WT	WT	WT	WT	WT	WT	WT	WT	WT	WT
coadread_dfci_2016	coadread_dfci_2016_3433	WT	WT	WT	V1001I	WT	WT	WT	WT	WT	WT	WT	WT	WT	WT	A2329D	WT	WT	WT	WT	WT	WT	WT	WT	WT	WT	WT	WT	WT	WT	WT	WT	WT	WT	WT	WT	WT	WT	WT	WT	WT	WT	WT	WT	WT	WT	WT	WT	WT
coadread_dfci_2016	coadread_dfci_2016_3020	WT	H403D	WT	WT	WT	WT	WT	WT	WT	WT	Y1546*	WT	WT	WT	WT	H765N R771S	WT	WT	WT	WT	WT	WT	WT	WT	WT	WT	WT	WT	WT	WT	WT	WT	WT	WT	WT	WT	WT	WT	WT	WT	WT	WT	WT	WT	WT	WT	WT	WT
coadread_dfci_2016	coadread_dfci_2016_2303	WT	WT	WT	WT	R2151H	WT	L1917R	WT	WT	WT	WT	WT	WT	WT	WT	WT	WT	WT	R3646Q	WT	WT	WT	WT	WT	L1849R	WT	WT	WT	WT	WT	WT	WT	WT	WT	WT	WT	WT	WT	WT	WT	WT	WT	WT	WT	WT	WT	WT	WT
coadread_dfci_2016	coadread_dfci_2016_3444	WT	R784*	WT	WT	WT	WT	Y400N	WT	WT	WT	WT	D375Y	WT	WT	WT	WT	WT	WT	WT	WT	WT	WT	WT	WT	WT	WT	WT	WT	WT	WT	WT	WT	WT	WT	WT	WT	WT	WT	WT	WT	WT	WT	WT	G550S	WT	WT	WT	WT
coadread_dfci_2016	coadread_dfci_2016_3048	WT	WT	WT	WT	WT	WT	WT	WT	WT	WT	WT	WT	WT	WT	WT	WT	WT	WT	R1341C	WT	WT	WT	WT	WT	WT	WT	WT	WT	WT	WT	WT	WT	WT	WT	WT	WT	WT	WT	WT	WT	WT	WT	WT	WT	WT	WT	WT	WT
coadread_dfci_2016	coadread_dfci_2016_2272	WT	WT	WT	WT	WT	WT	WT	WT	WT	WT	WT	WT	WT	WT	WT	WT	WT	WT	WT	WT	WT	WT	WT	WT	WT	WT	WT	WT	WT	WT	WT	WT	WT	WT	WT	WT	WT	WT	WT	WT	WT	WT	WT	WT	WT	WT	WT	WT
coadread_tcga	TCGA-AA-3831-01	WT	WT	WT	WT	WT	WT	WT	WT	WT	WT	WT	WT	WT	WT	WT	WT	WT	WT	WT	WT	WT	WT	WT	WT	WT	WT	WT	WT	WT	WT	WT	WT	WT	WT	WT	WT	WT	WT	WT	WT	WT	WT	WT	WT	P933A	WT	WT	WT
coadread_dfci_2016	coadread_dfci_2016_3011	WT	WT	WT	WT	WT	WT	WT	WT	WT	WT	A1478V	WT	WT	WT	WT	WT	WT	WT	WT	WT	WT	WT	WT	WT	WT	WT	WT	R3640Q	WT	WT	WT	WT	WT	WT	WT	WT	WT	WT	WT	WT	WT	WT	WT	WT	WT	WT	WT	WT
coadread_dfci_2016	coadread_dfci_2016_3720	WT	R221*	WT	WT	WT	WT	WT	WT	WT	WT	WT	WT	WT	WT	WT	WT	WT	WT	WT	WT	WT	WT	WT	WT	WT	WT	WT	A627G	WT	WT	WT	WT	WT	WT	WT	WT	WT	WT	WT	WT	WT	WT	T1460M	WT	WT	WT	WT	WT
coadread_dfci_2016	coadread_dfci_2016_1767	WT	WT	WT	WT	WT	WT	WT	WT	WT	WT	A3172V	WT	WT	WT	WT	WT	WT	WT	WT	WT	WT	WT	WT	WT	WT	WT	WT	WT	WT	WT	A1569T	WT	WT	WT	WT	WT	WT	R2125H	WT	WT	WT	WT	WT	WT	WT	WT	WT	WT
coadread_dfci_2016	coadread_dfci_2016_228	WT	WT	WT	WT	WT	WT	WT	WT	WT	WT	WT	WT	WT	E4847K	WT	WT	WT	WT	WT	WT	WT	WT	WT	WT	WT	WT	WT	WT	WT	WT	WT	WT	WT	WT	WT	WT	WT	WT	A107D	WT	WT	WT	WT	WT	WT	WT	WT	WT
coadread_dfci_2016	coadread_dfci_2016_2384	WT	WT	WT	WT	WT	WT	WT	WT	WT	WT	P2067S	WT	WT	WT	WT	WT	WT	WT	WT	WT	WT	WT	WT	WT	WT	WT	WT	WT	WT	WT	K1229Q	WT	WT	WT	WT	WT	WT	W2123*	WT	WT	WT	WT	WT	WT	WT	WT	WT	WT
coadread_dfci_2016	coadread_dfci_2016_3237	WT	WT	WT	WT	WT	WT	WT	WT	WT	WT	WT	WT	WT	WT	WT	WT	WT	WT	WT	WT	WT	WT	WT	WT	T784M	WT	WT	WT	WT	WT	WT	R1493H	WT	WT	WT	WT	WT	WT	WT	WT	WT	WT	WT	WT	WT	WT	WT	WT
coadread_dfci_2016	coadread_dfci_2016_3101	I190F D2443H	WT	WT	WT	WT	WT	WT	E1299*	WT	WT	WT	WT	WT	WT	WT	WT	WT	WT	WT	WT	WT	WT	WT	WT	WT	WT	WT	WT	WT	WT	WT	WT	WT	WT	WT	A13V	WT	WT	WT	WT	WT	WT	WT	WT	WT	WT	WT	WT
coadread_dfci_2016	coadread_dfci_2016_351	WT	WT	WT	WT	WT	WT	WT	WT	WT	WT	WT	WT	WT	WT	WT	WT	WT	WT	WT	WT	WT	WT	WT	WT	WT	WT	WT	WT	WT	WT	WT	WT	WT	WT	WT	WT	WT	WT	WT	WT	P1204L	WT	WT	WT	WT	WT	WT	WT
coadread_dfci_2016	coadread_dfci_2016_306835	WT	WT	WT	WT	WT	WT	WT	WT	WT	WT	WT	WT	WT	WT	WT	WT	WT	WT	WT	WT	WT	WT	WT	WT	WT	WT	WT	WT	WT	WT	WT	WT	WT	WT	WT	WT	WT	WT	WT	WT	WT	WT	WT	WT	WT	WT	WT	WT
coadread_dfci_2016	coadread_dfci_2016_3436	WT	WT	WT	WT	WT	WT	WT	WT	WT	WT	T755M	WT	WT	WT	WT	WT	WT	WT	WT	WT	WT	WT	WT	WT	WT	WT	WT	WT	WT	WT	WT	WT	WT	WT	WT	WT	WT	WT	D617N	WT	WT	WT	WT	WT	WT	WT	WT	R957Q
coadread_dfci_2016	coadread_dfci_2016_3417	WT	WT	WT	WT	WT	WT	WT	WT	WT	D622Y	WT	WT	WT	WT	WT	WT	WT	WT	WT	WT	WT	WT	WT	WT	WT	WT	WT	WT	WT	WT	WT	WT	WT	WT	WT	WT	WT	WT	WT	WT	WT	WT	WT	WT	WT	WT	WT	WT
coadread_dfci_2016	coadread_dfci_2016_3254	WT	WT	WT	WT	WT	WT	WT	WT	WT	WT	WT	WT	WT	WT	WT	WT	WT	WT	WT	WT	WT	WT	WT	WT	WT	WT	WT	WT	WT	WT	WT	WT	WT	WT	WT	T783A	WT	WT	WT	WT	WT	WT	WT	WT	WT	WT	WT	WT
coadread_dfci_2016	coadread_dfci_2016_3506	WT	WT	G146S	WT	WT	WT	WT	WT	WT	WT	WT	WT	WT	WT	WT	WT	WT	WT	WT	WT	WT	G825E	WT	WT	WT	WT	WT	WT	WT	WT	WT	WT	R366*	WT	WT	WT	WT	WT	WT	D30N	WT	WT	WT	WT	WT	WT	WT	WT
coadread_dfci_2016	coadread_dfci_2016_3261	WT	WT	WT	WT	WT	WT	WT	WT	WT	WT	WT	WT	WT	WT	WT	WT	WT	WT	WT	WT	WT	WT	WT	WT	WT	WT	WT	WT	WT	WT	WT	WT	WT	WT	WT	WT	WT	WT	WT	WT	WT	WT	WT	WT	WT	WT	WT	WT
coadread_dfci_2016	coadread_dfci_2016_610	WT	WT	WT	WT	WT	WT	WT	WT	WT	WT	WT	WT	WT	WT	WT	WT	WT	WT	WT	WT	WT	WT	WT	WT	WT	WT	WT	WT	WT	WT	WT	WT	WT	WT	WT	WT	WT	WT	WT	WT	WT	WT	WT	WT	WT	WT	WT	WT
coadread_dfci_2016	coadread_dfci_2016_1245	WT	WT	WT	WT	WT	WT	WT	WT	WT	WT	WT	WT	WT	WT	WT	WT	WT	WT	WT	WT	WT	WT	WT	WT	WT	WT	WT	WT	WT	WT	WT	WT	WT	WT	WT	WT	WT	WT	WT	WT	WT	WT	WT	WT	WT	WT	WT	WT
coadread_dfci_2016	coadread_dfci_2016_3270	WT	WT	WT	WT	WT	WT	WT	WT	WT	WT	WT	WT	WT	WT	WT	WT	WT	WT	WT	WT	WT	WT	R2653Q	WT	WT	WT	WT	WT	WT	WT	WT	WT	WT	WT	WT	WT	WT	WT	WT	WT	WT	WT	WT	WT	WT	WT	WT	WT
coadread_dfci_2016	coadread_dfci_2016_3226	WT	WT	WT	WT	WT	WT	WT	WT	WT	WT	WT	WT	WT	WT	WT	WT	WT	WT	WT	WT	WT	WT	WT	WT	WT	WT	WT	WT	WT	WT	WT	WT	WT	WT	WT	WT	WT	WT	WT	WT	WT	WT	WT	WT	WT	WT	WT	WT
coadread_dfci_2016	coadread_dfci_2016_3079	WT	WT	WT	WT	WT	WT	WT	WT	WT	WT	WT	WT	WT	R3489W	WT	WT	WT	WT	WT	WT	WT	WT	WT	WT	WT	WT	WT	WT	WT	WT	WT	WT	WT	WT	WT	WT	WT	WT	WT	WT	WT	WT	WT	WT	WT	WT	WT	WT
coadread_dfci_2016	coadread_dfci_2016_3654	WT	WT	WT	WT	WT	WT	WT	WT	WT	WT	WT	WT	WT	WT	WT	WT	WT	WT	WT	WT	WT	WT	WT	WT	WT	WT	WT	WT	WT	WT	WT	WT	WT	WT	WT	WT	WT	WT	WT	V1867M	WT	WT	WT	WT	WT	WT	WT	WT
coadread_dfci_2016	coadread_dfci_2016_3271	WT	WT	WT	WT	WT	WT	WT	WT	WT	WT	WT	WT	WT	WT	WT	WT	WT	WT	WT	WT	WT	WT	WT	P1710T	WT	WT	WT	WT	WT	WT	WT	WT	WT	WT	WT	WT	WT	WT	E913K	WT	WT	WT	WT	WT	N306K	WT	WT	WT
coadread_dfci_2016	coadread_dfci_2016_3563	WT	WT	WT	WT	WT	WT	WT	WT	WT	WT	WT	WT	WT	WT	WT	WT	WT	WT	WT	WT	WT	WT	WT	WT	WT	WT	WT	WT	WT	WT	WT	WT	WT	WT	WT	WT	WT	WT	WT	WT	WT	WT	WT	WT	WT	WT	WT	WT
coadread_dfci_2016	coadread_dfci_2016_1246	WT	WT	WT	WT	WT	WT	WT	WT	WT	WT	WT	WT	WT	WT	WT	WT	WT	WT	WT	WT	WT	WT	WT	WT	WT	R1086W	WT	WT	WT	WT	WT	WT	WT	WT	WT	WT	WT	WT	WT	WT	WT	WT	WT	WT	WT	WT	WT	WT
coadread_dfci_2016	coadread_dfci_2016_3450	WT	WT	WT	WT	WT	WT	WT	WT	WT	WT	WT	WT	WT	P885Q	R2283Q	WT	WT	WT	WT	WT	WT	WT	WT	WT	WT	WT	WT	WT	WT	WT	WT	WT	WT	WT	WT	WT	WT	WT	WT	WT	WT	WT	WT	WT	WT	WT	WT	WT
coadread_dfci_2016	coadread_dfci_2016_3710	WT	WT	WT	WT	WT	WT	WT	WT	WT	WT	WT	WT	WT	WT	WT	WT	WT	WT	WT	WT	R942C	WT	WT	WT	WT	WT	WT	A3539V D2598G	WT	WT	WT	WT	WT	WT	WT	WT	WT	WT	WT	WT	WT	WT	WT	WT	WT	WT	WT	WT
coadread_dfci_2016	coadread_dfci_2016_353	WT	WT	WT	WT	WT	WT	WT	WT	WT	WT	WT	WT	WT	WT	WT	WT	WT	WT	WT	WT	WT	WT	WT	WT	WT	WT	WT	WT	WT	WT	WT	WT	WT	WT	WT	WT	WT	WT	WT	WT	WT	WT	WT	WT	WT	WT	WT	WT
coadread_tcga	TCGA-AA-3850-01	WT	WT	WT	WT	R2381H	WT	WT	WT	WT	WT	WT	WT	WT	WT	WT	WT	R3098T	WT	WT	WT	WT	WT	WT	WT	WT	WT	WT	WT	WT	I1081T	WT	WT	WT	WT	WT	WT	WT	WT	WT	WT	WT	WT	WT	WT	WT	WT	WT	WT
coadread_dfci_2016	coadread_dfci_2016_2949	WT	WT	WT	A881V	WT	WT	WT	WT	WT	WT	WT	H1580Q	WT	WT	WT	WT	WT	WT	WT	WT	WT	WT	WT	WT	WT	WT	WT	WT	WT	WT	WT	WT	WT	WT	WT	WT	WT	WT	WT	WT	WT	WT	WT	WT	WT	WT	WT	WT
coadread_tcga	TCGA-AG-3600-01	WT	WT	WT	WT	WT	WT	WT	WT	WT	WT	WT	WT	WT	WT	WT	WT	WT	WT	WT	WT	WT	WT	WT	WT	WT	WT	E1022*	WT	WT	WT	WT	WT	WT	WT	WT	WT	WT	WT	WT	WT	WT	WT	WT	WT	Q1224H	WT	E1273Q	WT
coadread_dfci_2016	coadread_dfci_2016_1755	WT	WT	WT	WT	WT	WT	WT	WT	WT	WT	WT	WT	WT	D2511Y	WT	WT	WT	WT	WT	WT	WT	WT	WT	WT	WT	WT	WT	WT	WT	WT	WT	WT	WT	WT	WT	WT	WT	E2757*	WT	WT	WT	WT	WT	WT	WT	WT	WT	WT
coadread_tcga	TCGA-AA-3696-01	WT	WT	WT	WT	WT	WT	D260Y	WT	WT	WT	WT	WT	D661N	V1110I	WT	WT	WT	WT	WT	WT	WT	WT	WT	WT	WT	WT	WT	WT	WT	WT	WT	WT	WT	WT	WT	WT	WT	WT	WT	WT	WT	WT	WT	WT	WT	WT	WT	WT
coadread_tcga	TCGA-A6-2675-01	NS	NS	NS	NS	NS	NS	NS	NS	NS	NS	NS	NS	NS	NS	NS	NS	NS	NS	NS	NS	NS	NS	NS	NS	NS	NS	NS	NS	NS	NS	NS	NS	NS	NS	NS	NS	NS	NS	NS	NS	NS	NS	NS	NS	NS	NS	NS	NS
coadread_tcga	TCGA-A6-5667-01	NS	NS	NS	NS	NS	NS	NS	NS	NS	NS	NS	NS	NS	NS	NS	NS	NS	NS	NS	NS	NS	NS	NS	NS	NS	NS	NS	NS	NS	NS	NS	NS	NS	NS	NS	NS	NS	NS	NS	NS	NS	NS	NS	NS	NS	NS	NS	NS
coadread_tcga	TCGA-AA-3655-01	NS	NS	NS	NS	NS	NS	NS	NS	NS	NS	NS	NS	NS	NS	NS	NS	NS	NS	NS	NS	NS	NS	NS	NS	NS	NS	NS	NS	NS	NS	NS	NS	NS	NS	NS	NS	NS	NS	NS	NS	NS	NS	NS	NS	NS	NS	NS	NS
coadread_tcga	TCGA-AA-3660-01	NS	NS	NS	NS	NS	NS	NS	NS	NS	NS	NS	NS	NS	NS	NS	NS	NS	NS	NS	NS	NS	NS	NS	NS	NS	NS	NS	NS	NS	NS	NS	NS	NS	NS	NS	NS	NS	NS	NS	NS	NS	NS	NS	NS	NS	NS	NS	NS
coadread_tcga	TCGA-AA-3662-01	NS	NS	NS	NS	NS	NS	NS	NS	NS	NS	NS	NS	NS	NS	NS	NS	NS	NS	NS	NS	NS	NS	NS	NS	NS	NS	NS	NS	NS	NS	NS	NS	NS	NS	NS	NS	NS	NS	NS	NS	NS	NS	NS	NS	NS	NS	NS	NS
coadread_tcga	TCGA-AA-3663-01	NS	NS	NS	NS	NS	NS	NS	NS	NS	NS	NS	NS	NS	NS	NS	NS	NS	NS	NS	NS	NS	NS	NS	NS	NS	NS	NS	NS	NS	NS	NS	NS	NS	NS	NS	NS	NS	NS	NS	NS	NS	NS	NS	NS	NS	NS	NS	NS
coadread_tcga	TCGA-AA-3697-01	NS	NS	NS	NS	NS	NS	NS	NS	NS	NS	NS	NS	NS	NS	NS	NS	NS	NS	NS	NS	NS	NS	NS	NS	NS	NS	NS	NS	NS	NS	NS	NS	NS	NS	NS	NS	NS	NS	NS	NS	NS	NS	NS	NS	NS	NS	NS	NS
coadread_tcga	TCGA-AA-3712-01	NS	NS	NS	NS	NS	NS	NS	NS	NS	NS	NS	NS	NS	NS	NS	NS	NS	NS	NS	NS	NS	NS	NS	NS	NS	NS	NS	NS	NS	NS	NS	NS	NS	NS	NS	NS	NS	NS	NS	NS	NS	NS	NS	NS	NS	NS	NS	NS
coadread_tcga	TCGA-AA-3713-01	NS	NS	NS	NS	NS	NS	NS	NS	NS	NS	NS	NS	NS	NS	NS	NS	NS	NS	NS	NS	NS	NS	NS	NS	NS	NS	NS	NS	NS	NS	NS	NS	NS	NS	NS	NS	NS	NS	NS	NS	NS	NS	NS	NS	NS	NS	NS	NS
coadread_tcga	TCGA-AU-3779-01	NS	NS	NS	NS	NS	NS	NS	NS	NS	NS	NS	NS	NS	NS	NS	NS	NS	NS	NS	NS	NS	NS	NS	NS	NS	NS	NS	NS	NS	NS	NS	NS	NS	NS	NS	NS	NS	NS	NS	NS	NS	NS	NS	NS	NS	NS	NS	NS
coadread_tcga	TCGA-AU-6004-01	NS	NS	NS	NS	NS	NS	NS	NS	NS	NS	NS	NS	NS	NS	NS	NS	NS	NS	NS	NS	NS	NS	NS	NS	NS	NS	NS	NS	NS	NS	NS	NS	NS	NS	NS	NS	NS	NS	NS	NS	NS	NS	NS	NS	NS	NS	NS	NS
coadread_tcga	TCGA-AY-6196-01	NS	NS	NS	NS	NS	NS	NS	NS	NS	NS	NS	NS	NS	NS	NS	NS	NS	NS	NS	NS	NS	NS	NS	NS	NS	NS	NS	NS	NS	NS	NS	NS	NS	NS	NS	NS	NS	NS	NS	NS	NS	NS	NS	NS	NS	NS	NS	NS
coadread_tcga	TCGA-AY-6197-01	NS	NS	NS	NS	NS	NS	NS	NS	NS	NS	NS	NS	NS	NS	NS	NS	NS	NS	NS	NS	NS	NS	NS	NS	NS	NS	NS	NS	NS	NS	NS	NS	NS	NS	NS	NS	NS	NS	NS	NS	NS	NS	NS	NS	NS	NS	NS	NS
coadread_tcga	TCGA-AY-6386-01	NS	NS	NS	NS	NS	NS	NS	NS	NS	NS	NS	NS	NS	NS	NS	NS	NS	NS	NS	NS	NS	NS	NS	NS	NS	NS	NS	NS	NS	NS	NS	NS	NS	NS	NS	NS	NS	NS	NS	NS	NS	NS	NS	NS	NS	NS	NS	NS
coadread_tcga	TCGA-AZ-5407-01	NS	NS	NS	NS	NS	NS	NS	NS	NS	NS	NS	NS	NS	NS	NS	NS	NS	NS	NS	NS	NS	NS	NS	NS	NS	NS	NS	NS	NS	NS	NS	NS	NS	NS	NS	NS	NS	NS	NS	NS	NS	NS	NS	NS	NS	NS	NS	NS
coadread_tcga	TCGA-CK-4950-01	NS	NS	NS	NS	NS	NS	NS	NS	NS	NS	NS	NS	NS	NS	NS	NS	NS	NS	NS	NS	NS	NS	NS	NS	NS	NS	NS	NS	NS	NS	NS	NS	NS	NS	NS	NS	NS	NS	NS	NS	NS	NS	NS	NS	NS	NS	NS	NS
coadread_tcga	TCGA-CK-4952-01	NS	NS	NS	NS	NS	NS	NS	NS	NS	NS	NS	NS	NS	NS	NS	NS	NS	NS	NS	NS	NS	NS	NS	NS	NS	NS	NS	NS	NS	NS	NS	NS	NS	NS	NS	NS	NS	NS	NS	NS	NS	NS	NS	NS	NS	NS	NS	NS
coadread_tcga	TCGA-CM-4743-01	NS	NS	NS	NS	NS	NS	NS	NS	NS	NS	NS	NS	NS	NS	NS	NS	NS	NS	NS	NS	NS	NS	NS	NS	NS	NS	NS	NS	NS	NS	NS	NS	NS	NS	NS	NS	NS	NS	NS	NS	NS	NS	NS	NS	NS	NS	NS	NS
coadread_tcga	TCGA-CM-5344-01	NS	NS	NS	NS	NS	NS	NS	NS	NS	NS	NS	NS	NS	NS	NS	NS	NS	NS	NS	NS	NS	NS	NS	NS	NS	NS	NS	NS	NS	NS	NS	NS	NS	NS	NS	NS	NS	NS	NS	NS	NS	NS	NS	NS	NS	NS	NS	NS
coadread_tcga	TCGA-CM-5348-01	NS	NS	NS	NS	NS	NS	NS	NS	NS	NS	NS	NS	NS	NS	NS	NS	NS	NS	NS	NS	NS	NS	NS	NS	NS	NS	NS	NS	NS	NS	NS	NS	NS	NS	NS	NS	NS	NS	NS	NS	NS	NS	NS	NS	NS	NS	NS	NS
coadread_tcga	TCGA-CM-5349-01	NS	NS	NS	NS	NS	NS	NS	NS	NS	NS	NS	NS	NS	NS	NS	NS	NS	NS	NS	NS	NS	NS	NS	NS	NS	NS	NS	NS	NS	NS	NS	NS	NS	NS	NS	NS	NS	NS	NS	NS	NS	NS	NS	NS	NS	NS	NS	NS
coadread_tcga	TCGA-D5-6530-01	NS	NS	NS	NS	NS	NS	NS	NS	NS	NS	NS	NS	NS	NS	NS	NS	NS	NS	NS	NS	NS	NS	NS	NS	NS	NS	NS	NS	NS	NS	NS	NS	NS	NS	NS	NS	NS	NS	NS	NS	NS	NS	NS	NS	NS	NS	NS	NS
coadread_tcga	TCGA-D5-6531-01	NS	NS	NS	NS	NS	NS	NS	NS	NS	NS	NS	NS	NS	NS	NS	NS	NS	NS	NS	NS	NS	NS	NS	NS	NS	NS	NS	NS	NS	NS	NS	NS	NS	NS	NS	NS	NS	NS	NS	NS	NS	NS	NS	NS	NS	NS	NS	NS
coadread_tcga	TCGA-D5-6532-01	NS	NS	NS	NS	NS	NS	NS	NS	NS	NS	NS	NS	NS	NS	NS	NS	NS	NS	NS	NS	NS	NS	NS	NS	NS	NS	NS	NS	NS	NS	NS	NS	NS	NS	NS	NS	NS	NS	NS	NS	NS	NS	NS	NS	NS	NS	NS	NS
coadread_tcga	TCGA-D5-6533-01	NS	NS	NS	NS	NS	NS	NS	NS	NS	NS	NS	NS	NS	NS	NS	NS	NS	NS	NS	NS	NS	NS	NS	NS	NS	NS	NS	NS	NS	NS	NS	NS	NS	NS	NS	NS	NS	NS	NS	NS	NS	NS	NS	NS	NS	NS	NS	NS
coadread_tcga	TCGA-D5-6535-01	NS	NS	NS	NS	NS	NS	NS	NS	NS	NS	NS	NS	NS	NS	NS	NS	NS	NS	NS	NS	NS	NS	NS	NS	NS	NS	NS	NS	NS	NS	NS	NS	NS	NS	NS	NS	NS	NS	NS	NS	NS	NS	NS	NS	NS	NS	NS	NS
coadread_tcga	TCGA-D5-6536-01	NS	NS	NS	NS	NS	NS	NS	NS	NS	NS	NS	NS	NS	NS	NS	NS	NS	NS	NS	NS	NS	NS	NS	NS	NS	NS	NS	NS	NS	NS	NS	NS	NS	NS	NS	NS	NS	NS	NS	NS	NS	NS	NS	NS	NS	NS	NS	NS
coadread_tcga	TCGA-D5-6537-01	NS	NS	NS	NS	NS	NS	NS	NS	NS	NS	NS	NS	NS	NS	NS	NS	NS	NS	NS	NS	NS	NS	NS	NS	NS	NS	NS	NS	NS	NS	NS	NS	NS	NS	NS	NS	NS	NS	NS	NS	NS	NS	NS	NS	NS	NS	NS	NS
coadread_tcga	TCGA-D5-6538-01	NS	NS	NS	NS	NS	NS	NS	NS	NS	NS	NS	NS	NS	NS	NS	NS	NS	NS	NS	NS	NS	NS	NS	NS	NS	NS	NS	NS	NS	NS	NS	NS	NS	NS	NS	NS	NS	NS	NS	NS	NS	NS	NS	NS	NS	NS	NS	NS
coadread_tcga	TCGA-D5-6539-01	NS	NS	NS	NS	NS	NS	NS	NS	NS	NS	NS	NS	NS	NS	NS	NS	NS	NS	NS	NS	NS	NS	NS	NS	NS	NS	NS	NS	NS	NS	NS	NS	NS	NS	NS	NS	NS	NS	NS	NS	NS	NS	NS	NS	NS	NS	NS	NS
coadread_tcga	TCGA-D5-6540-01	NS	NS	NS	NS	NS	NS	NS	NS	NS	NS	NS	NS	NS	NS	NS	NS	NS	NS	NS	NS	NS	NS	NS	NS	NS	NS	NS	NS	NS	NS	NS	NS	NS	NS	NS	NS	NS	NS	NS	NS	NS	NS	NS	NS	NS	NS	NS	NS
coadread_tcga	TCGA-D5-6541-01	NS	NS	NS	NS	NS	NS	NS	NS	NS	NS	NS	NS	NS	NS	NS	NS	NS	NS	NS	NS	NS	NS	NS	NS	NS	NS	NS	NS	NS	NS	NS	NS	NS	NS	NS	NS	NS	NS	NS	NS	NS	NS	NS	NS	NS	NS	NS	NS
coadread_tcga	TCGA-F4-6463-01	NS	NS	NS	NS	NS	NS	NS	NS	NS	NS	NS	NS	NS	NS	NS	NS	NS	NS	NS	NS	NS	NS	NS	NS	NS	NS	NS	NS	NS	NS	NS	NS	NS	NS	NS	NS	NS	NS	NS	NS	NS	NS	NS	NS	NS	NS	NS	NS
coadread_tcga	TCGA-G4-6293-01	NS	NS	NS	NS	NS	NS	NS	NS	NS	NS	NS	NS	NS	NS	NS	NS	NS	NS	NS	NS	NS	NS	NS	NS	NS	NS	NS	NS	NS	NS	NS	NS	NS	NS	NS	NS	NS	NS	NS	NS	NS	NS	NS	NS	NS	NS	NS	NS
coadread_tcga	TCGA-G4-6295-01	NS	NS	NS	NS	NS	NS	NS	NS	NS	NS	NS	NS	NS	NS	NS	NS	NS	NS	NS	NS	NS	NS	NS	NS	NS	NS	NS	NS	NS	NS	NS	NS	NS	NS	NS	NS	NS	NS	NS	NS	NS	NS	NS	NS	NS	NS	NS	NS
coadread_tcga	TCGA-G4-6297-01	NS	NS	NS	NS	NS	NS	NS	NS	NS	NS	NS	NS	NS	NS	NS	NS	NS	NS	NS	NS	NS	NS	NS	NS	NS	NS	NS	NS	NS	NS	NS	NS	NS	NS	NS	NS	NS	NS	NS	NS	NS	NS	NS	NS	NS	NS	NS	NS
coadread_tcga	TCGA-G4-6298-01	NS	NS	NS	NS	NS	NS	NS	NS	NS	NS	NS	NS	NS	NS	NS	NS	NS	NS	NS	NS	NS	NS	NS	NS	NS	NS	NS	NS	NS	NS	NS	NS	NS	NS	NS	NS	NS	NS	NS	NS	NS	NS	NS	NS	NS	NS	NS	NS
coadread_tcga	TCGA-G4-6302-01	NS	NS	NS	NS	NS	NS	NS	NS	NS	NS	NS	NS	NS	NS	NS	NS	NS	NS	NS	NS	NS	NS	NS	NS	NS	NS	NS	NS	NS	NS	NS	NS	NS	NS	NS	NS	NS	NS	NS	NS	NS	NS	NS	NS	NS	NS	NS	NS
coadread_tcga	TCGA-G4-6307-01	NS	NS	NS	NS	NS	NS	NS	NS	NS	NS	NS	NS	NS	NS	NS	NS	NS	NS	NS	NS	NS	NS	NS	NS	NS	NS	NS	NS	NS	NS	NS	NS	NS	NS	NS	NS	NS	NS	NS	NS	NS	NS	NS	NS	NS	NS	NS	NS
coadread_tcga	TCGA-G4-6310-01	NS	NS	NS	NS	NS	NS	NS	NS	NS	NS	NS	NS	NS	NS	NS	NS	NS	NS	NS	NS	NS	NS	NS	NS	NS	NS	NS	NS	NS	NS	NS	NS	NS	NS	NS	NS	NS	NS	NS	NS	NS	NS	NS	NS	NS	NS	NS	NS
coadread_tcga	TCGA-G4-6311-01	NS	NS	NS	NS	NS	NS	NS	NS	NS	NS	NS	NS	NS	NS	NS	NS	NS	NS	NS	NS	NS	NS	NS	NS	NS	NS	NS	NS	NS	NS	NS	NS	NS	NS	NS	NS	NS	NS	NS	NS	NS	NS	NS	NS	NS	NS	NS	NS
coadread_tcga	TCGA-G4-6314-01	NS	NS	NS	NS	NS	NS	NS	NS	NS	NS	NS	NS	NS	NS	NS	NS	NS	NS	NS	NS	NS	NS	NS	NS	NS	NS	NS	NS	NS	NS	NS	NS	NS	NS	NS	NS	NS	NS	NS	NS	NS	NS	NS	NS	NS	NS	NS	NS
coadread_tcga	TCGA-G4-6315-01	NS	NS	NS	NS	NS	NS	NS	NS	NS	NS	NS	NS	NS	NS	NS	NS	NS	NS	NS	NS	NS	NS	NS	NS	NS	NS	NS	NS	NS	NS	NS	NS	NS	NS	NS	NS	NS	NS	NS	NS	NS	NS	NS	NS	NS	NS	NS	NS
coadread_tcga	TCGA-G4-6317-01	NS	NS	NS	NS	NS	NS	NS	NS	NS	NS	NS	NS	NS	NS	NS	NS	NS	NS	NS	NS	NS	NS	NS	NS	NS	NS	NS	NS	NS	NS	NS	NS	NS	NS	NS	NS	NS	NS	NS	NS	NS	NS	NS	NS	NS	NS	NS	NS
coadread_tcga	TCGA-G4-6320-01	NS	NS	NS	NS	NS	NS	NS	NS	NS	NS	NS	NS	NS	NS	NS	NS	NS	NS	NS	NS	NS	NS	NS	NS	NS	NS	NS	NS	NS	NS	NS	NS	NS	NS	NS	NS	NS	NS	NS	NS	NS	NS	NS	NS	NS	NS	NS	NS
coadread_tcga	TCGA-G4-6321-01	NS	NS	NS	NS	NS	NS	NS	NS	NS	NS	NS	NS	NS	NS	NS	NS	NS	NS	NS	NS	NS	NS	NS	NS	NS	NS	NS	NS	NS	NS	NS	NS	NS	NS	NS	NS	NS	NS	NS	NS	NS	NS	NS	NS	NS	NS	NS	NS
coadread_tcga	TCGA-G4-6322-01	NS	NS	NS	NS	NS	NS	NS	NS	NS	NS	NS	NS	NS	NS	NS	NS	NS	NS	NS	NS	NS	NS	NS	NS	NS	NS	NS	NS	NS	NS	NS	NS	NS	NS	NS	NS	NS	NS	NS	NS	NS	NS	NS	NS	NS	NS	NS	NS
coadread_tcga	TCGA-G4-6323-01	NS	NS	NS	NS	NS	NS	NS	NS	NS	NS	NS	NS	NS	NS	NS	NS	NS	NS	NS	NS	NS	NS	NS	NS	NS	NS	NS	NS	NS	NS	NS	NS	NS	NS	NS	NS	NS	NS	NS	NS	NS	NS	NS	NS	NS	NS	NS	NS
coadread_tcga	TCGA-A6-4105-01	NS	NS	NS	NS	NS	NS	NS	NS	NS	NS	NS	NS	NS	NS	NS	NS	NS	NS	NS	NS	NS	NS	NS	NS	NS	NS	NS	NS	NS	NS	NS	NS	NS	NS	NS	NS	NS	NS	NS	NS	NS	NS	NS	NS	NS	NS	NS	NS
coadread_tcga	TCGA-A6-6137-01	NS	NS	NS	NS	NS	NS	NS	NS	NS	NS	NS	NS	NS	NS	NS	NS	NS	NS	NS	NS	NS	NS	NS	NS	NS	NS	NS	NS	NS	NS	NS	NS	NS	NS	NS	NS	NS	NS	NS	NS	NS	NS	NS	NS	NS	NS	NS	NS
coadread_tcga	TCGA-A6-6138-01	NS	NS	NS	NS	NS	NS	NS	NS	NS	NS	NS	NS	NS	NS	NS	NS	NS	NS	NS	NS	NS	NS	NS	NS	NS	NS	NS	NS	NS	NS	NS	NS	NS	NS	NS	NS	NS	NS	NS	NS	NS	NS	NS	NS	NS	NS	NS	NS
coadread_tcga	TCGA-A6-6140-01	NS	NS	NS	NS	NS	NS	NS	NS	NS	NS	NS	NS	NS	NS	NS	NS	NS	NS	NS	NS	NS	NS	NS	NS	NS	NS	NS	NS	NS	NS	NS	NS	NS	NS	NS	NS	NS	NS	NS	NS	NS	NS	NS	NS	NS	NS	NS	NS
coadread_tcga	TCGA-A6-6141-01	NS	NS	NS	NS	NS	NS	NS	NS	NS	NS	NS	NS	NS	NS	NS	NS	NS	NS	NS	NS	NS	NS	NS	NS	NS	NS	NS	NS	NS	NS	NS	NS	NS	NS	NS	NS	NS	NS	NS	NS	NS	NS	NS	NS	NS	NS	NS	NS
coadread_tcga	TCGA-A6-6142-01	NS	NS	NS	NS	NS	NS	NS	NS	NS	NS	NS	NS	NS	NS	NS	NS	NS	NS	NS	NS	NS	NS	NS	NS	NS	NS	NS	NS	NS	NS	NS	NS	NS	NS	NS	NS	NS	NS	NS	NS	NS	NS	NS	NS	NS	NS	NS	NS
coadread_tcga	TCGA-A6-6648-01	NS	NS	NS	NS	NS	NS	NS	NS	NS	NS	NS	NS	NS	NS	NS	NS	NS	NS	NS	NS	NS	NS	NS	NS	NS	NS	NS	NS	NS	NS	NS	NS	NS	NS	NS	NS	NS	NS	NS	NS	NS	NS	NS	NS	NS	NS	NS	NS
coadread_tcga	TCGA-A6-6649-01	NS	NS	NS	NS	NS	NS	NS	NS	NS	NS	NS	NS	NS	NS	NS	NS	NS	NS	NS	NS	NS	NS	NS	NS	NS	NS	NS	NS	NS	NS	NS	NS	NS	NS	NS	NS	NS	NS	NS	NS	NS	NS	NS	NS	NS	NS	NS	NS
coadread_tcga	TCGA-A6-6650-01	NS	NS	NS	NS	NS	NS	NS	NS	NS	NS	NS	NS	NS	NS	NS	NS	NS	NS	NS	NS	NS	NS	NS	NS	NS	NS	NS	NS	NS	NS	NS	NS	NS	NS	NS	NS	NS	NS	NS	NS	NS	NS	NS	NS	NS	NS	NS	NS
coadread_tcga	TCGA-A6-6652-01	NS	NS	NS	NS	NS	NS	NS	NS	NS	NS	NS	NS	NS	NS	NS	NS	NS	NS	NS	NS	NS	NS	NS	NS	NS	NS	NS	NS	NS	NS	NS	NS	NS	NS	NS	NS	NS	NS	NS	NS	NS	NS	NS	NS	NS	NS	NS	NS
coadread_tcga	TCGA-A6-6653-01	NS	NS	NS	NS	NS	NS	NS	NS	NS	NS	NS	NS	NS	NS	NS	NS	NS	NS	NS	NS	NS	NS	NS	NS	NS	NS	NS	NS	NS	NS	NS	NS	NS	NS	NS	NS	NS	NS	NS	NS	NS	NS	NS	NS	NS	NS	NS	NS
coadread_tcga	TCGA-AZ-6598-01	NS	NS	NS	NS	NS	NS	NS	NS	NS	NS	NS	NS	NS	NS	NS	NS	NS	NS	NS	NS	NS	NS	NS	NS	NS	NS	NS	NS	NS	NS	NS	NS	NS	NS	NS	NS	NS	NS	NS	NS	NS	NS	NS	NS	NS	NS	NS	NS
coadread_tcga	TCGA-AZ-6599-01	NS	NS	NS	NS	NS	NS	NS	NS	NS	NS	NS	NS	NS	NS	NS	NS	NS	NS	NS	NS	NS	NS	NS	NS	NS	NS	NS	NS	NS	NS	NS	NS	NS	NS	NS	NS	NS	NS	NS	NS	NS	NS	NS	NS	NS	NS	NS	NS
coadread_tcga	TCGA-AZ-6600-01	NS	NS	NS	NS	NS	NS	NS	NS	NS	NS	NS	NS	NS	NS	NS	NS	NS	NS	NS	NS	NS	NS	NS	NS	NS	NS	NS	NS	NS	NS	NS	NS	NS	NS	NS	NS	NS	NS	NS	NS	NS	NS	NS	NS	NS	NS	NS	NS
coadread_tcga	TCGA-AZ-6601-01	NS	NS	NS	NS	NS	NS	NS	NS	NS	NS	NS	NS	NS	NS	NS	NS	NS	NS	NS	NS	NS	NS	NS	NS	NS	NS	NS	NS	NS	NS	NS	NS	NS	NS	NS	NS	NS	NS	NS	NS	NS	NS	NS	NS	NS	NS	NS	NS
coadread_tcga	TCGA-D5-6529-01	NS	NS	NS	NS	NS	NS	NS	NS	NS	NS	NS	NS	NS	NS	NS	NS	NS	NS	NS	NS	NS	NS	NS	NS	NS	NS	NS	NS	NS	NS	NS	NS	NS	NS	NS	NS	NS	NS	NS	NS	NS	NS	NS	NS	NS	NS	NS	NS
coadread_tcga	TCGA-F4-6459-01	NS	NS	NS	NS	NS	NS	NS	NS	NS	NS	NS	NS	NS	NS	NS	NS	NS	NS	NS	NS	NS	NS	NS	NS	NS	NS	NS	NS	NS	NS	NS	NS	NS	NS	NS	NS	NS	NS	NS	NS	NS	NS	NS	NS	NS	NS	NS	NS
coadread_tcga	TCGA-F4-6460-01	NS	NS	NS	NS	NS	NS	NS	NS	NS	NS	NS	NS	NS	NS	NS	NS	NS	NS	NS	NS	NS	NS	NS	NS	NS	NS	NS	NS	NS	NS	NS	NS	NS	NS	NS	NS	NS	NS	NS	NS	NS	NS	NS	NS	NS	NS	NS	NS
coadread_tcga	TCGA-F4-6461-01	NS	NS	NS	NS	NS	NS	NS	NS	NS	NS	NS	NS	NS	NS	NS	NS	NS	NS	NS	NS	NS	NS	NS	NS	NS	NS	NS	NS	NS	NS	NS	NS	NS	NS	NS	NS	NS	NS	NS	NS	NS	NS	NS	NS	NS	NS	NS	NS
coadread_tcga	TCGA-F4-6569-01	NS	NS	NS	NS	NS	NS	NS	NS	NS	NS	NS	NS	NS	NS	NS	NS	NS	NS	NS	NS	NS	NS	NS	NS	NS	NS	NS	NS	NS	NS	NS	NS	NS	NS	NS	NS	NS	NS	NS	NS	NS	NS	NS	NS	NS	NS	NS	NS
coadread_tcga	TCGA-F4-6570-01	NS	NS	NS	NS	NS	NS	NS	NS	NS	NS	NS	NS	NS	NS	NS	NS	NS	NS	NS	NS	NS	NS	NS	NS	NS	NS	NS	NS	NS	NS	NS	NS	NS	NS	NS	NS	NS	NS	NS	NS	NS	NS	NS	NS	NS	NS	NS	NS
coadread_tcga	TCGA-G4-6294-01	NS	NS	NS	NS	NS	NS	NS	NS	NS	NS	NS	NS	NS	NS	NS	NS	NS	NS	NS	NS	NS	NS	NS	NS	NS	NS	NS	NS	NS	NS	NS	NS	NS	NS	NS	NS	NS	NS	NS	NS	NS	NS	NS	NS	NS	NS	NS	NS
coadread_tcga	TCGA-G4-6299-01	NS	NS	NS	NS	NS	NS	NS	NS	NS	NS	NS	NS	NS	NS	NS	NS	NS	NS	NS	NS	NS	NS	NS	NS	NS	NS	NS	NS	NS	NS	NS	NS	NS	NS	NS	NS	NS	NS	NS	NS	NS	NS	NS	NS	NS	NS	NS	NS
coadread_tcga	TCGA-G4-6303-01	NS	NS	NS	NS	NS	NS	NS	NS	NS	NS	NS	NS	NS	NS	NS	NS	NS	NS	NS	NS	NS	NS	NS	NS	NS	NS	NS	NS	NS	NS	NS	NS	NS	NS	NS	NS	NS	NS	NS	NS	NS	NS	NS	NS	NS	NS	NS	NS
coadread_tcga	TCGA-G4-6306-01	NS	NS	NS	NS	NS	NS	NS	NS	NS	NS	NS	NS	NS	NS	NS	NS	NS	NS	NS	NS	NS	NS	NS	NS	NS	NS	NS	NS	NS	NS	NS	NS	NS	NS	NS	NS	NS	NS	NS	NS	NS	NS	NS	NS	NS	NS	NS	NS
coadread_tcga	TCGA-G4-6586-01	NS	NS	NS	NS	NS	NS	NS	NS	NS	NS	NS	NS	NS	NS	NS	NS	NS	NS	NS	NS	NS	NS	NS	NS	NS	NS	NS	NS	NS	NS	NS	NS	NS	NS	NS	NS	NS	NS	NS	NS	NS	NS	NS	NS	NS	NS	NS	NS
coadread_tcga	TCGA-G4-6588-01	NS	NS	NS	NS	NS	NS	NS	NS	NS	NS	NS	NS	NS	NS	NS	NS	NS	NS	NS	NS	NS	NS	NS	NS	NS	NS	NS	NS	NS	NS	NS	NS	NS	NS	NS	NS	NS	NS	NS	NS	NS	NS	NS	NS	NS	NS	NS	NS
coadread_tcga	TCGA-G4-6625-01	NS	NS	NS	NS	NS	NS	NS	NS	NS	NS	NS	NS	NS	NS	NS	NS	NS	NS	NS	NS	NS	NS	NS	NS	NS	NS	NS	NS	NS	NS	NS	NS	NS	NS	NS	NS	NS	NS	NS	NS	NS	NS	NS	NS	NS	NS	NS	NS
coadread_tcga	TCGA-G4-6626-01	NS	NS	NS	NS	NS	NS	NS	NS	NS	NS	NS	NS	NS	NS	NS	NS	NS	NS	NS	NS	NS	NS	NS	NS	NS	NS	NS	NS	NS	NS	NS	NS	NS	NS	NS	NS	NS	NS	NS	NS	NS	NS	NS	NS	NS	NS	NS	NS
coadread_tcga	TCGA-G4-6627-01	NS	NS	NS	NS	NS	NS	NS	NS	NS	NS	NS	NS	NS	NS	NS	NS	NS	NS	NS	NS	NS	NS	NS	NS	NS	NS	NS	NS	NS	NS	NS	NS	NS	NS	NS	NS	NS	NS	NS	NS	NS	NS	NS	NS	NS	NS	NS	NS
coadread_tcga	TCGA-DM-A0X9-01	NS	NS	NS	NS	NS	NS	NS	NS	NS	NS	NS	NS	NS	NS	NS	NS	NS	NS	NS	NS	NS	NS	NS	NS	NS	NS	NS	NS	NS	NS	NS	NS	NS	NS	NS	NS	NS	NS	NS	NS	NS	NS	NS	NS	NS	NS	NS	NS
coadread_tcga	TCGA-DM-A0XD-01	NS	NS	NS	NS	NS	NS	NS	NS	NS	NS	NS	NS	NS	NS	NS	NS	NS	NS	NS	NS	NS	NS	NS	NS	NS	NS	NS	NS	NS	NS	NS	NS	NS	NS	NS	NS	NS	NS	NS	NS	NS	NS	NS	NS	NS	NS	NS	NS
coadread_tcga	TCGA-DM-A0XF-01	NS	NS	NS	NS	NS	NS	NS	NS	NS	NS	NS	NS	NS	NS	NS	NS	NS	NS	NS	NS	NS	NS	NS	NS	NS	NS	NS	NS	NS	NS	NS	NS	NS	NS	NS	NS	NS	NS	NS	NS	NS	NS	NS	NS	NS	NS	NS	NS
coadread_tcga	TCGA-DM-A1D0-01	NS	NS	NS	NS	NS	NS	NS	NS	NS	NS	NS	NS	NS	NS	NS	NS	NS	NS	NS	NS	NS	NS	NS	NS	NS	NS	NS	NS	NS	NS	NS	NS	NS	NS	NS	NS	NS	NS	NS	NS	NS	NS	NS	NS	NS	NS	NS	NS
coadread_tcga	TCGA-DM-A1D4-01	NS	NS	NS	NS	NS	NS	NS	NS	NS	NS	NS	NS	NS	NS	NS	NS	NS	NS	NS	NS	NS	NS	NS	NS	NS	NS	NS	NS	NS	NS	NS	NS	NS	NS	NS	NS	NS	NS	NS	NS	NS	NS	NS	NS	NS	NS	NS	NS
coadread_tcga	TCGA-DM-A1D6-01	NS	NS	NS	NS	NS	NS	NS	NS	NS	NS	NS	NS	NS	NS	NS	NS	NS	NS	NS	NS	NS	NS	NS	NS	NS	NS	NS	NS	NS	NS	NS	NS	NS	NS	NS	NS	NS	NS	NS	NS	NS	NS	NS	NS	NS	NS	NS	NS
coadread_tcga	TCGA-DM-A1D7-01	NS	NS	NS	NS	NS	NS	NS	NS	NS	NS	NS	NS	NS	NS	NS	NS	NS	NS	NS	NS	NS	NS	NS	NS	NS	NS	NS	NS	NS	NS	NS	NS	NS	NS	NS	NS	NS	NS	NS	NS	NS	NS	NS	NS	NS	NS	NS	NS
coadread_tcga	TCGA-DM-A1D8-01	NS	NS	NS	NS	NS	NS	NS	NS	NS	NS	NS	NS	NS	NS	NS	NS	NS	NS	NS	NS	NS	NS	NS	NS	NS	NS	NS	NS	NS	NS	NS	NS	NS	NS	NS	NS	NS	NS	NS	NS	NS	NS	NS	NS	NS	NS	NS	NS
coadread_tcga	TCGA-DM-A1D9-01	NS	NS	NS	NS	NS	NS	NS	NS	NS	NS	NS	NS	NS	NS	NS	NS	NS	NS	NS	NS	NS	NS	NS	NS	NS	NS	NS	NS	NS	NS	NS	NS	NS	NS	NS	NS	NS	NS	NS	NS	NS	NS	NS	NS	NS	NS	NS	NS
coadread_tcga	TCGA-DM-A1DA-01	NS	NS	NS	NS	NS	NS	NS	NS	NS	NS	NS	NS	NS	NS	NS	NS	NS	NS	NS	NS	NS	NS	NS	NS	NS	NS	NS	NS	NS	NS	NS	NS	NS	NS	NS	NS	NS	NS	NS	NS	NS	NS	NS	NS	NS	NS	NS	NS
coadread_tcga	TCGA-DM-A1DB-01	NS	NS	NS	NS	NS	NS	NS	NS	NS	NS	NS	NS	NS	NS	NS	NS	NS	NS	NS	NS	NS	NS	NS	NS	NS	NS	NS	NS	NS	NS	NS	NS	NS	NS	NS	NS	NS	NS	NS	NS	NS	NS	NS	NS	NS	NS	NS	NS
coadread_tcga	TCGA-DM-A1HA-01	NS	NS	NS	NS	NS	NS	NS	NS	NS	NS	NS	NS	NS	NS	NS	NS	NS	NS	NS	NS	NS	NS	NS	NS	NS	NS	NS	NS	NS	NS	NS	NS	NS	NS	NS	NS	NS	NS	NS	NS	NS	NS	NS	NS	NS	NS	NS	NS
coadread_tcga	TCGA-A6-5656-01	NS	NS	NS	NS	NS	NS	NS	NS	NS	NS	NS	NS	NS	NS	NS	NS	NS	NS	NS	NS	NS	NS	NS	NS	NS	NS	NS	NS	NS	NS	NS	NS	NS	NS	NS	NS	NS	NS	NS	NS	NS	NS	NS	NS	NS	NS	NS	NS
coadread_tcga	TCGA-A6-5664-01	NS	NS	NS	NS	NS	NS	NS	NS	NS	NS	NS	NS	NS	NS	NS	NS	NS	NS	NS	NS	NS	NS	NS	NS	NS	NS	NS	NS	NS	NS	NS	NS	NS	NS	NS	NS	NS	NS	NS	NS	NS	NS	NS	NS	NS	NS	NS	NS
coadread_tcga	TCGA-A6-6651-01	NS	NS	NS	NS	NS	NS	NS	NS	NS	NS	NS	NS	NS	NS	NS	NS	NS	NS	NS	NS	NS	NS	NS	NS	NS	NS	NS	NS	NS	NS	NS	NS	NS	NS	NS	NS	NS	NS	NS	NS	NS	NS	NS	NS	NS	NS	NS	NS
coadread_tcga	TCGA-A6-6654-01	NS	NS	NS	NS	NS	NS	NS	NS	NS	NS	NS	NS	NS	NS	NS	NS	NS	NS	NS	NS	NS	NS	NS	NS	NS	NS	NS	NS	NS	NS	NS	NS	NS	NS	NS	NS	NS	NS	NS	NS	NS	NS	NS	NS	NS	NS	NS	NS
coadread_tcga	TCGA-A6-6780-01	NS	NS	NS	NS	NS	NS	NS	NS	NS	NS	NS	NS	NS	NS	NS	NS	NS	NS	NS	NS	NS	NS	NS	NS	NS	NS	NS	NS	NS	NS	NS	NS	NS	NS	NS	NS	NS	NS	NS	NS	NS	NS	NS	NS	NS	NS	NS	NS
coadread_tcga	TCGA-A6-6782-01	NS	NS	NS	NS	NS	NS	NS	NS	NS	NS	NS	NS	NS	NS	NS	NS	NS	NS	NS	NS	NS	NS	NS	NS	NS	NS	NS	NS	NS	NS	NS	NS	NS	NS	NS	NS	NS	NS	NS	NS	NS	NS	NS	NS	NS	NS	NS	NS
coadread_tcga	TCGA-AA-3489-01	NS	NS	NS	NS	NS	NS	NS	NS	NS	NS	NS	NS	NS	NS	NS	NS	NS	NS	NS	NS	NS	NS	NS	NS	NS	NS	NS	NS	NS	NS	NS	NS	NS	NS	NS	NS	NS	NS	NS	NS	NS	NS	NS	NS	NS	NS	NS	NS
coadread_tcga	TCGA-AA-3496-01	NS	NS	NS	NS	NS	NS	NS	NS	NS	NS	NS	NS	NS	NS	NS	NS	NS	NS	NS	NS	NS	NS	NS	NS	NS	NS	NS	NS	NS	NS	NS	NS	NS	NS	NS	NS	NS	NS	NS	NS	NS	NS	NS	NS	NS	NS	NS	NS
coadread_tcga	TCGA-AA-3511-01	NS	NS	NS	NS	NS	NS	NS	NS	NS	NS	NS	NS	NS	NS	NS	NS	NS	NS	NS	NS	NS	NS	NS	NS	NS	NS	NS	NS	NS	NS	NS	NS	NS	NS	NS	NS	NS	NS	NS	NS	NS	NS	NS	NS	NS	NS	NS	NS
coadread_tcga	TCGA-AD-6548-01	NS	NS	NS	NS	NS	NS	NS	NS	NS	NS	NS	NS	NS	NS	NS	NS	NS	NS	NS	NS	NS	NS	NS	NS	NS	NS	NS	NS	NS	NS	NS	NS	NS	NS	NS	NS	NS	NS	NS	NS	NS	NS	NS	NS	NS	NS	NS	NS
coadread_tcga	TCGA-AZ-4323-01	NS	NS	NS	NS	NS	NS	NS	NS	NS	NS	NS	NS	NS	NS	NS	NS	NS	NS	NS	NS	NS	NS	NS	NS	NS	NS	NS	NS	NS	NS	NS	NS	NS	NS	NS	NS	NS	NS	NS	NS	NS	NS	NS	NS	NS	NS	NS	NS
coadread_tcga	TCGA-AZ-4616-01	NS	NS	NS	NS	NS	NS	NS	NS	NS	NS	NS	NS	NS	NS	NS	NS	NS	NS	NS	NS	NS	NS	NS	NS	NS	NS	NS	NS	NS	NS	NS	NS	NS	NS	NS	NS	NS	NS	NS	NS	NS	NS	NS	NS	NS	NS	NS	NS
coadread_tcga	TCGA-AZ-6603-01	NS	NS	NS	NS	NS	NS	NS	NS	NS	NS	NS	NS	NS	NS	NS	NS	NS	NS	NS	NS	NS	NS	NS	NS	NS	NS	NS	NS	NS	NS	NS	NS	NS	NS	NS	NS	NS	NS	NS	NS	NS	NS	NS	NS	NS	NS	NS	NS
coadread_tcga	TCGA-AZ-6605-01	NS	NS	NS	NS	NS	NS	NS	NS	NS	NS	NS	NS	NS	NS	NS	NS	NS	NS	NS	NS	NS	NS	NS	NS	NS	NS	NS	NS	NS	NS	NS	NS	NS	NS	NS	NS	NS	NS	NS	NS	NS	NS	NS	NS	NS	NS	NS	NS
coadread_tcga	TCGA-AZ-6606-01	NS	NS	NS	NS	NS	NS	NS	NS	NS	NS	NS	NS	NS	NS	NS	NS	NS	NS	NS	NS	NS	NS	NS	NS	NS	NS	NS	NS	NS	NS	NS	NS	NS	NS	NS	NS	NS	NS	NS	NS	NS	NS	NS	NS	NS	NS	NS	NS
coadread_tcga	TCGA-AZ-6607-01	NS	NS	NS	NS	NS	NS	NS	NS	NS	NS	NS	NS	NS	NS	NS	NS	NS	NS	NS	NS	NS	NS	NS	NS	NS	NS	NS	NS	NS	NS	NS	NS	NS	NS	NS	NS	NS	NS	NS	NS	NS	NS	NS	NS	NS	NS	NS	NS
coadread_tcga	TCGA-AZ-6608-01	NS	NS	NS	NS	NS	NS	NS	NS	NS	NS	NS	NS	NS	NS	NS	NS	NS	NS	NS	NS	NS	NS	NS	NS	NS	NS	NS	NS	NS	NS	NS	NS	NS	NS	NS	NS	NS	NS	NS	NS	NS	NS	NS	NS	NS	NS	NS	NS
coadread_tcga	TCGA-CA-5254-01	NS	NS	NS	NS	NS	NS	NS	NS	NS	NS	NS	NS	NS	NS	NS	NS	NS	NS	NS	NS	NS	NS	NS	NS	NS	NS	NS	NS	NS	NS	NS	NS	NS	NS	NS	NS	NS	NS	NS	NS	NS	NS	NS	NS	NS	NS	NS	NS
coadread_tcga	TCGA-CA-5255-01	NS	NS	NS	NS	NS	NS	NS	NS	NS	NS	NS	NS	NS	NS	NS	NS	NS	NS	NS	NS	NS	NS	NS	NS	NS	NS	NS	NS	NS	NS	NS	NS	NS	NS	NS	NS	NS	NS	NS	NS	NS	NS	NS	NS	NS	NS	NS	NS
coadread_tcga	TCGA-CA-6715-01	NS	NS	NS	NS	NS	NS	NS	NS	NS	NS	NS	NS	NS	NS	NS	NS	NS	NS	NS	NS	NS	NS	NS	NS	NS	NS	NS	NS	NS	NS	NS	NS	NS	NS	NS	NS	NS	NS	NS	NS	NS	NS	NS	NS	NS	NS	NS	NS
coadread_tcga	TCGA-CA-6716-01	NS	NS	NS	NS	NS	NS	NS	NS	NS	NS	NS	NS	NS	NS	NS	NS	NS	NS	NS	NS	NS	NS	NS	NS	NS	NS	NS	NS	NS	NS	NS	NS	NS	NS	NS	NS	NS	NS	NS	NS	NS	NS	NS	NS	NS	NS	NS	NS
coadread_tcga	TCGA-CA-6717-01	NS	NS	NS	NS	NS	NS	NS	NS	NS	NS	NS	NS	NS	NS	NS	NS	NS	NS	NS	NS	NS	NS	NS	NS	NS	NS	NS	NS	NS	NS	NS	NS	NS	NS	NS	NS	NS	NS	NS	NS	NS	NS	NS	NS	NS	NS	NS	NS
coadread_tcga	TCGA-CA-6718-01	NS	NS	NS	NS	NS	NS	NS	NS	NS	NS	NS	NS	NS	NS	NS	NS	NS	NS	NS	NS	NS	NS	NS	NS	NS	NS	NS	NS	NS	NS	NS	NS	NS	NS	NS	NS	NS	NS	NS	NS	NS	NS	NS	NS	NS	NS	NS	NS
coadread_tcga	TCGA-CA-6719-01	NS	NS	NS	NS	NS	NS	NS	NS	NS	NS	NS	NS	NS	NS	NS	NS	NS	NS	NS	NS	NS	NS	NS	NS	NS	NS	NS	NS	NS	NS	NS	NS	NS	NS	NS	NS	NS	NS	NS	NS	NS	NS	NS	NS	NS	NS	NS	NS
coadread_tcga	TCGA-CK-6746-01	NS	NS	NS	NS	NS	NS	NS	NS	NS	NS	NS	NS	NS	NS	NS	NS	NS	NS	NS	NS	NS	NS	NS	NS	NS	NS	NS	NS	NS	NS	NS	NS	NS	NS	NS	NS	NS	NS	NS	NS	NS	NS	NS	NS	NS	NS	NS	NS
coadread_tcga	TCGA-CK-6747-01	NS	NS	NS	NS	NS	NS	NS	NS	NS	NS	NS	NS	NS	NS	NS	NS	NS	NS	NS	NS	NS	NS	NS	NS	NS	NS	NS	NS	NS	NS	NS	NS	NS	NS	NS	NS	NS	NS	NS	NS	NS	NS	NS	NS	NS	NS	NS	NS
coadread_tcga	TCGA-CK-6748-01	NS	NS	NS	NS	NS	NS	NS	NS	NS	NS	NS	NS	NS	NS	NS	NS	NS	NS	NS	NS	NS	NS	NS	NS	NS	NS	NS	NS	NS	NS	NS	NS	NS	NS	NS	NS	NS	NS	NS	NS	NS	NS	NS	NS	NS	NS	NS	NS
coadread_tcga	TCGA-CK-6751-01	NS	NS	NS	NS	NS	NS	NS	NS	NS	NS	NS	NS	NS	NS	NS	NS	NS	NS	NS	NS	NS	NS	NS	NS	NS	NS	NS	NS	NS	NS	NS	NS	NS	NS	NS	NS	NS	NS	NS	NS	NS	NS	NS	NS	NS	NS	NS	NS
coadread_tcga	TCGA-CM-4751-01	NS	NS	NS	NS	NS	NS	NS	NS	NS	NS	NS	NS	NS	NS	NS	NS	NS	NS	NS	NS	NS	NS	NS	NS	NS	NS	NS	NS	NS	NS	NS	NS	NS	NS	NS	NS	NS	NS	NS	NS	NS	NS	NS	NS	NS	NS	NS	NS
coadread_tcga	TCGA-CM-5863-01	NS	NS	NS	NS	NS	NS	NS	NS	NS	NS	NS	NS	NS	NS	NS	NS	NS	NS	NS	NS	NS	NS	NS	NS	NS	NS	NS	NS	NS	NS	NS	NS	NS	NS	NS	NS	NS	NS	NS	NS	NS	NS	NS	NS	NS	NS	NS	NS
coadread_tcga	TCGA-CM-6674-01	NS	NS	NS	NS	NS	NS	NS	NS	NS	NS	NS	NS	NS	NS	NS	NS	NS	NS	NS	NS	NS	NS	NS	NS	NS	NS	NS	NS	NS	NS	NS	NS	NS	NS	NS	NS	NS	NS	NS	NS	NS	NS	NS	NS	NS	NS	NS	NS
coadread_tcga	TCGA-CM-6675-01	NS	NS	NS	NS	NS	NS	NS	NS	NS	NS	NS	NS	NS	NS	NS	NS	NS	NS	NS	NS	NS	NS	NS	NS	NS	NS	NS	NS	NS	NS	NS	NS	NS	NS	NS	NS	NS	NS	NS	NS	NS	NS	NS	NS	NS	NS	NS	NS
coadread_tcga	TCGA-CM-6676-01	NS	NS	NS	NS	NS	NS	NS	NS	NS	NS	NS	NS	NS	NS	NS	NS	NS	NS	NS	NS	NS	NS	NS	NS	NS	NS	NS	NS	NS	NS	NS	NS	NS	NS	NS	NS	NS	NS	NS	NS	NS	NS	NS	NS	NS	NS	NS	NS
coadread_tcga	TCGA-CM-6677-01	NS	NS	NS	NS	NS	NS	NS	NS	NS	NS	NS	NS	NS	NS	NS	NS	NS	NS	NS	NS	NS	NS	NS	NS	NS	NS	NS	NS	NS	NS	NS	NS	NS	NS	NS	NS	NS	NS	NS	NS	NS	NS	NS	NS	NS	NS	NS	NS
coadread_tcga	TCGA-CM-6678-01	NS	NS	NS	NS	NS	NS	NS	NS	NS	NS	NS	NS	NS	NS	NS	NS	NS	NS	NS	NS	NS	NS	NS	NS	NS	NS	NS	NS	NS	NS	NS	NS	NS	NS	NS	NS	NS	NS	NS	NS	NS	NS	NS	NS	NS	NS	NS	NS
coadread_tcga	TCGA-CM-6679-01	NS	NS	NS	NS	NS	NS	NS	NS	NS	NS	NS	NS	NS	NS	NS	NS	NS	NS	NS	NS	NS	NS	NS	NS	NS	NS	NS	NS	NS	NS	NS	NS	NS	NS	NS	NS	NS	NS	NS	NS	NS	NS	NS	NS	NS	NS	NS	NS
coadread_tcga	TCGA-CM-6680-01	NS	NS	NS	NS	NS	NS	NS	NS	NS	NS	NS	NS	NS	NS	NS	NS	NS	NS	NS	NS	NS	NS	NS	NS	NS	NS	NS	NS	NS	NS	NS	NS	NS	NS	NS	NS	NS	NS	NS	NS	NS	NS	NS	NS	NS	NS	NS	NS
coadread_tcga	TCGA-F4-6703-01	NS	NS	NS	NS	NS	NS	NS	NS	NS	NS	NS	NS	NS	NS	NS	NS	NS	NS	NS	NS	NS	NS	NS	NS	NS	NS	NS	NS	NS	NS	NS	NS	NS	NS	NS	NS	NS	NS	NS	NS	NS	NS	NS	NS	NS	NS	NS	NS
coadread_tcga	TCGA-F4-6704-01	NS	NS	NS	NS	NS	NS	NS	NS	NS	NS	NS	NS	NS	NS	NS	NS	NS	NS	NS	NS	NS	NS	NS	NS	NS	NS	NS	NS	NS	NS	NS	NS	NS	NS	NS	NS	NS	NS	NS	NS	NS	NS	NS	NS	NS	NS	NS	NS
coadread_tcga	TCGA-F4-6805-01	NS	NS	NS	NS	NS	NS	NS	NS	NS	NS	NS	NS	NS	NS	NS	NS	NS	NS	NS	NS	NS	NS	NS	NS	NS	NS	NS	NS	NS	NS	NS	NS	NS	NS	NS	NS	NS	NS	NS	NS	NS	NS	NS	NS	NS	NS	NS	NS
coadread_tcga	TCGA-F4-6806-01	NS	NS	NS	NS	NS	NS	NS	NS	NS	NS	NS	NS	NS	NS	NS	NS	NS	NS	NS	NS	NS	NS	NS	NS	NS	NS	NS	NS	NS	NS	NS	NS	NS	NS	NS	NS	NS	NS	NS	NS	NS	NS	NS	NS	NS	NS	NS	NS
coadread_tcga	TCGA-F4-6807-01	NS	NS	NS	NS	NS	NS	NS	NS	NS	NS	NS	NS	NS	NS	NS	NS	NS	NS	NS	NS	NS	NS	NS	NS	NS	NS	NS	NS	NS	NS	NS	NS	NS	NS	NS	NS	NS	NS	NS	NS	NS	NS	NS	NS	NS	NS	NS	NS
coadread_tcga	TCGA-F4-6808-01	NS	NS	NS	NS	NS	NS	NS	NS	NS	NS	NS	NS	NS	NS	NS	NS	NS	NS	NS	NS	NS	NS	NS	NS	NS	NS	NS	NS	NS	NS	NS	NS	NS	NS	NS	NS	NS	NS	NS	NS	NS	NS	NS	NS	NS	NS	NS	NS
coadread_tcga	TCGA-F4-6809-01	NS	NS	NS	NS	NS	NS	NS	NS	NS	NS	NS	NS	NS	NS	NS	NS	NS	NS	NS	NS	NS	NS	NS	NS	NS	NS	NS	NS	NS	NS	NS	NS	NS	NS	NS	NS	NS	NS	NS	NS	NS	NS	NS	NS	NS	NS	NS	NS
coadread_tcga	TCGA-G4-6309-01	NS	NS	NS	NS	NS	NS	NS	NS	NS	NS	NS	NS	NS	NS	NS	NS	NS	NS	NS	NS	NS	NS	NS	NS	NS	NS	NS	NS	NS	NS	NS	NS	NS	NS	NS	NS	NS	NS	NS	NS	NS	NS	NS	NS	NS	NS	NS	NS
coadread_tcga	TCGA-G4-6628-01	NS	NS	NS	NS	NS	NS	NS	NS	NS	NS	NS	NS	NS	NS	NS	NS	NS	NS	NS	NS	NS	NS	NS	NS	NS	NS	NS	NS	NS	NS	NS	NS	NS	NS	NS	NS	NS	NS	NS	NS	NS	NS	NS	NS	NS	NS	NS	NS
coadread_tcga	TCGA-DM-A280-01	NS	NS	NS	NS	NS	NS	NS	NS	NS	NS	NS	NS	NS	NS	NS	NS	NS	NS	NS	NS	NS	NS	NS	NS	NS	NS	NS	NS	NS	NS	NS	NS	NS	NS	NS	NS	NS	NS	NS	NS	NS	NS	NS	NS	NS	NS	NS	NS
coadread_tcga	TCGA-DM-A282-01	NS	NS	NS	NS	NS	NS	NS	NS	NS	NS	NS	NS	NS	NS	NS	NS	NS	NS	NS	NS	NS	NS	NS	NS	NS	NS	NS	NS	NS	NS	NS	NS	NS	NS	NS	NS	NS	NS	NS	NS	NS	NS	NS	NS	NS	NS	NS	NS
coadread_tcga	TCGA-DM-A285-01	NS	NS	NS	NS	NS	NS	NS	NS	NS	NS	NS	NS	NS	NS	NS	NS	NS	NS	NS	NS	NS	NS	NS	NS	NS	NS	NS	NS	NS	NS	NS	NS	NS	NS	NS	NS	NS	NS	NS	NS	NS	NS	NS	NS	NS	NS	NS	NS
coadread_tcga	TCGA-DM-A288-01	NS	NS	NS	NS	NS	NS	NS	NS	NS	NS	NS	NS	NS	NS	NS	NS	NS	NS	NS	NS	NS	NS	NS	NS	NS	NS	NS	NS	NS	NS	NS	NS	NS	NS	NS	NS	NS	NS	NS	NS	NS	NS	NS	NS	NS	NS	NS	NS
coadread_tcga	TCGA-DM-A28A-01	NS	NS	NS	NS	NS	NS	NS	NS	NS	NS	NS	NS	NS	NS	NS	NS	NS	NS	NS	NS	NS	NS	NS	NS	NS	NS	NS	NS	NS	NS	NS	NS	NS	NS	NS	NS	NS	NS	NS	NS	NS	NS	NS	NS	NS	NS	NS	NS
coadread_tcga	TCGA-DM-A28C-01	NS	NS	NS	NS	NS	NS	NS	NS	NS	NS	NS	NS	NS	NS	NS	NS	NS	NS	NS	NS	NS	NS	NS	NS	NS	NS	NS	NS	NS	NS	NS	NS	NS	NS	NS	NS	NS	NS	NS	NS	NS	NS	NS	NS	NS	NS	NS	NS
coadread_tcga	TCGA-DM-A28E-01	NS	NS	NS	NS	NS	NS	NS	NS	NS	NS	NS	NS	NS	NS	NS	NS	NS	NS	NS	NS	NS	NS	NS	NS	NS	NS	NS	NS	NS	NS	NS	NS	NS	NS	NS	NS	NS	NS	NS	NS	NS	NS	NS	NS	NS	NS	NS	NS
coadread_tcga	TCGA-DM-A28F-01	NS	NS	NS	NS	NS	NS	NS	NS	NS	NS	NS	NS	NS	NS	NS	NS	NS	NS	NS	NS	NS	NS	NS	NS	NS	NS	NS	NS	NS	NS	NS	NS	NS	NS	NS	NS	NS	NS	NS	NS	NS	NS	NS	NS	NS	NS	NS	NS
coadread_tcga	TCGA-DM-A28G-01	NS	NS	NS	NS	NS	NS	NS	NS	NS	NS	NS	NS	NS	NS	NS	NS	NS	NS	NS	NS	NS	NS	NS	NS	NS	NS	NS	NS	NS	NS	NS	NS	NS	NS	NS	NS	NS	NS	NS	NS	NS	NS	NS	NS	NS	NS	NS	NS
coadread_tcga	TCGA-DM-A28H-01	NS	NS	NS	NS	NS	NS	NS	NS	NS	NS	NS	NS	NS	NS	NS	NS	NS	NS	NS	NS	NS	NS	NS	NS	NS	NS	NS	NS	NS	NS	NS	NS	NS	NS	NS	NS	NS	NS	NS	NS	NS	NS	NS	NS	NS	NS	NS	NS
coadread_tcga	TCGA-DM-A28K-01	NS	NS	NS	NS	NS	NS	NS	NS	NS	NS	NS	NS	NS	NS	NS	NS	NS	NS	NS	NS	NS	NS	NS	NS	NS	NS	NS	NS	NS	NS	NS	NS	NS	NS	NS	NS	NS	NS	NS	NS	NS	NS	NS	NS	NS	NS	NS	NS
coadread_tcga	TCGA-DM-A28M-01	NS	NS	NS	NS	NS	NS	NS	NS	NS	NS	NS	NS	NS	NS	NS	NS	NS	NS	NS	NS	NS	NS	NS	NS	NS	NS	NS	NS	NS	NS	NS	NS	NS	NS	NS	NS	NS	NS	NS	NS	NS	NS	NS	NS	NS	NS	NS	NS
coadread_tcga	TCGA-A6-6781-01	NS	NS	NS	NS	NS	NS	NS	NS	NS	NS	NS	NS	NS	NS	NS	NS	NS	NS	NS	NS	NS	NS	NS	NS	NS	NS	NS	NS	NS	NS	NS	NS	NS	NS	NS	NS	NS	NS	NS	NS	NS	NS	NS	NS	NS	NS	NS	NS
coadread_tcga	TCGA-AD-6888-01	NS	NS	NS	NS	NS	NS	NS	NS	NS	NS	NS	NS	NS	NS	NS	NS	NS	NS	NS	NS	NS	NS	NS	NS	NS	NS	NS	NS	NS	NS	NS	NS	NS	NS	NS	NS	NS	NS	NS	NS	NS	NS	NS	NS	NS	NS	NS	NS
coadread_tcga	TCGA-AD-6889-01	NS	NS	NS	NS	NS	NS	NS	NS	NS	NS	NS	NS	NS	NS	NS	NS	NS	NS	NS	NS	NS	NS	NS	NS	NS	NS	NS	NS	NS	NS	NS	NS	NS	NS	NS	NS	NS	NS	NS	NS	NS	NS	NS	NS	NS	NS	NS	NS
coadread_tcga	TCGA-AD-6890-01	NS	NS	NS	NS	NS	NS	NS	NS	NS	NS	NS	NS	NS	NS	NS	NS	NS	NS	NS	NS	NS	NS	NS	NS	NS	NS	NS	NS	NS	NS	NS	NS	NS	NS	NS	NS	NS	NS	NS	NS	NS	NS	NS	NS	NS	NS	NS	NS
coadread_tcga	TCGA-AD-6895-01	NS	NS	NS	NS	NS	NS	NS	NS	NS	NS	NS	NS	NS	NS	NS	NS	NS	NS	NS	NS	NS	NS	NS	NS	NS	NS	NS	NS	NS	NS	NS	NS	NS	NS	NS	NS	NS	NS	NS	NS	NS	NS	NS	NS	NS	NS	NS	NS
coadread_tcga	TCGA-AD-6899-01	NS	NS	NS	NS	NS	NS	NS	NS	NS	NS	NS	NS	NS	NS	NS	NS	NS	NS	NS	NS	NS	NS	NS	NS	NS	NS	NS	NS	NS	NS	NS	NS	NS	NS	NS	NS	NS	NS	NS	NS	NS	NS	NS	NS	NS	NS	NS	NS
coadread_tcga	TCGA-AD-6901-01	NS	NS	NS	NS	NS	NS	NS	NS	NS	NS	NS	NS	NS	NS	NS	NS	NS	NS	NS	NS	NS	NS	NS	NS	NS	NS	NS	NS	NS	NS	NS	NS	NS	NS	NS	NS	NS	NS	NS	NS	NS	NS	NS	NS	NS	NS	NS	NS
coadread_tcga	TCGA-AD-6963-01	NS	NS	NS	NS	NS	NS	NS	NS	NS	NS	NS	NS	NS	NS	NS	NS	NS	NS	NS	NS	NS	NS	NS	NS	NS	NS	NS	NS	NS	NS	NS	NS	NS	NS	NS	NS	NS	NS	NS	NS	NS	NS	NS	NS	NS	NS	NS	NS
coadread_tcga	TCGA-AD-6964-01	NS	NS	NS	NS	NS	NS	NS	NS	NS	NS	NS	NS	NS	NS	NS	NS	NS	NS	NS	NS	NS	NS	NS	NS	NS	NS	NS	NS	NS	NS	NS	NS	NS	NS	NS	NS	NS	NS	NS	NS	NS	NS	NS	NS	NS	NS	NS	NS
coadread_tcga	TCGA-AD-6965-01	NS	NS	NS	NS	NS	NS	NS	NS	NS	NS	NS	NS	NS	NS	NS	NS	NS	NS	NS	NS	NS	NS	NS	NS	NS	NS	NS	NS	NS	NS	NS	NS	NS	NS	NS	NS	NS	NS	NS	NS	NS	NS	NS	NS	NS	NS	NS	NS
coadread_tcga	TCGA-D5-5537-01	NS	NS	NS	NS	NS	NS	NS	NS	NS	NS	NS	NS	NS	NS	NS	NS	NS	NS	NS	NS	NS	NS	NS	NS	NS	NS	NS	NS	NS	NS	NS	NS	NS	NS	NS	NS	NS	NS	NS	NS	NS	NS	NS	NS	NS	NS	NS	NS
coadread_tcga	TCGA-D5-6534-01	NS	NS	NS	NS	NS	NS	NS	NS	NS	NS	NS	NS	NS	NS	NS	NS	NS	NS	NS	NS	NS	NS	NS	NS	NS	NS	NS	NS	NS	NS	NS	NS	NS	NS	NS	NS	NS	NS	NS	NS	NS	NS	NS	NS	NS	NS	NS	NS
coadread_tcga	TCGA-D5-6898-01	NS	NS	NS	NS	NS	NS	NS	NS	NS	NS	NS	NS	NS	NS	NS	NS	NS	NS	NS	NS	NS	NS	NS	NS	NS	NS	NS	NS	NS	NS	NS	NS	NS	NS	NS	NS	NS	NS	NS	NS	NS	NS	NS	NS	NS	NS	NS	NS
coadread_tcga	TCGA-D5-6920-01	NS	NS	NS	NS	NS	NS	NS	NS	NS	NS	NS	NS	NS	NS	NS	NS	NS	NS	NS	NS	NS	NS	NS	NS	NS	NS	NS	NS	NS	NS	NS	NS	NS	NS	NS	NS	NS	NS	NS	NS	NS	NS	NS	NS	NS	NS	NS	NS
coadread_tcga	TCGA-D5-6922-01	NS	NS	NS	NS	NS	NS	NS	NS	NS	NS	NS	NS	NS	NS	NS	NS	NS	NS	NS	NS	NS	NS	NS	NS	NS	NS	NS	NS	NS	NS	NS	NS	NS	NS	NS	NS	NS	NS	NS	NS	NS	NS	NS	NS	NS	NS	NS	NS
coadread_tcga	TCGA-D5-6923-01	NS	NS	NS	NS	NS	NS	NS	NS	NS	NS	NS	NS	NS	NS	NS	NS	NS	NS	NS	NS	NS	NS	NS	NS	NS	NS	NS	NS	NS	NS	NS	NS	NS	NS	NS	NS	NS	NS	NS	NS	NS	NS	NS	NS	NS	NS	NS	NS
coadread_tcga	TCGA-D5-6924-01	NS	NS	NS	NS	NS	NS	NS	NS	NS	NS	NS	NS	NS	NS	NS	NS	NS	NS	NS	NS	NS	NS	NS	NS	NS	NS	NS	NS	NS	NS	NS	NS	NS	NS	NS	NS	NS	NS	NS	NS	NS	NS	NS	NS	NS	NS	NS	NS
coadread_tcga	TCGA-D5-6926-01	NS	NS	NS	NS	NS	NS	NS	NS	NS	NS	NS	NS	NS	NS	NS	NS	NS	NS	NS	NS	NS	NS	NS	NS	NS	NS	NS	NS	NS	NS	NS	NS	NS	NS	NS	NS	NS	NS	NS	NS	NS	NS	NS	NS	NS	NS	NS	NS
coadread_tcga	TCGA-D5-6927-01	NS	NS	NS	NS	NS	NS	NS	NS	NS	NS	NS	NS	NS	NS	NS	NS	NS	NS	NS	NS	NS	NS	NS	NS	NS	NS	NS	NS	NS	NS	NS	NS	NS	NS	NS	NS	NS	NS	NS	NS	NS	NS	NS	NS	NS	NS	NS	NS
coadread_tcga	TCGA-D5-6928-01	NS	NS	NS	NS	NS	NS	NS	NS	NS	NS	NS	NS	NS	NS	NS	NS	NS	NS	NS	NS	NS	NS	NS	NS	NS	NS	NS	NS	NS	NS	NS	NS	NS	NS	NS	NS	NS	NS	NS	NS	NS	NS	NS	NS	NS	NS	NS	NS
coadread_tcga	TCGA-D5-6929-01	NS	NS	NS	NS	NS	NS	NS	NS	NS	NS	NS	NS	NS	NS	NS	NS	NS	NS	NS	NS	NS	NS	NS	NS	NS	NS	NS	NS	NS	NS	NS	NS	NS	NS	NS	NS	NS	NS	NS	NS	NS	NS	NS	NS	NS	NS	NS	NS
coadread_tcga	TCGA-D5-6930-01	NS	NS	NS	NS	NS	NS	NS	NS	NS	NS	NS	NS	NS	NS	NS	NS	NS	NS	NS	NS	NS	NS	NS	NS	NS	NS	NS	NS	NS	NS	NS	NS	NS	NS	NS	NS	NS	NS	NS	NS	NS	NS	NS	NS	NS	NS	NS	NS
coadread_tcga	TCGA-D5-6931-01	NS	NS	NS	NS	NS	NS	NS	NS	NS	NS	NS	NS	NS	NS	NS	NS	NS	NS	NS	NS	NS	NS	NS	NS	NS	NS	NS	NS	NS	NS	NS	NS	NS	NS	NS	NS	NS	NS	NS	NS	NS	NS	NS	NS	NS	NS	NS	NS
coadread_tcga	TCGA-D5-6932-01	NS	NS	NS	NS	NS	NS	NS	NS	NS	NS	NS	NS	NS	NS	NS	NS	NS	NS	NS	NS	NS	NS	NS	NS	NS	NS	NS	NS	NS	NS	NS	NS	NS	NS	NS	NS	NS	NS	NS	NS	NS	NS	NS	NS	NS	NS	NS	NS
coadread_tcga	TCGA-D5-7000-01	NS	NS	NS	NS	NS	NS	NS	NS	NS	NS	NS	NS	NS	NS	NS	NS	NS	NS	NS	NS	NS	NS	NS	NS	NS	NS	NS	NS	NS	NS	NS	NS	NS	NS	NS	NS	NS	NS	NS	NS	NS	NS	NS	NS	NS	NS	NS	NS
coadread_tcga	TCGA-F4-6854-01	NS	NS	NS	NS	NS	NS	NS	NS	NS	NS	NS	NS	NS	NS	NS	NS	NS	NS	NS	NS	NS	NS	NS	NS	NS	NS	NS	NS	NS	NS	NS	NS	NS	NS	NS	NS	NS	NS	NS	NS	NS	NS	NS	NS	NS	NS	NS	NS
coadread_tcga	TCGA-F4-6855-01	NS	NS	NS	NS	NS	NS	NS	NS	NS	NS	NS	NS	NS	NS	NS	NS	NS	NS	NS	NS	NS	NS	NS	NS	NS	NS	NS	NS	NS	NS	NS	NS	NS	NS	NS	NS	NS	NS	NS	NS	NS	NS	NS	NS	NS	NS	NS	NS
coadread_tcga	TCGA-F4-6856-01	NS	NS	NS	NS	NS	NS	NS	NS	NS	NS	NS	NS	NS	NS	NS	NS	NS	NS	NS	NS	NS	NS	NS	NS	NS	NS	NS	NS	NS	NS	NS	NS	NS	NS	NS	NS	NS	NS	NS	NS	NS	NS	NS	NS	NS	NS	NS	NS
coadread_tcga	TCGA-F4-6857-01	NS	NS	NS	NS	NS	NS	NS	NS	NS	NS	NS	NS	NS	NS	NS	NS	NS	NS	NS	NS	NS	NS	NS	NS	NS	NS	NS	NS	NS	NS	NS	NS	NS	NS	NS	NS	NS	NS	NS	NS	NS	NS	NS	NS	NS	NS	NS	NS
coadread_tcga	TCGA-G4-6304-01	NS	NS	NS	NS	NS	NS	NS	NS	NS	NS	NS	NS	NS	NS	NS	NS	NS	NS	NS	NS	NS	NS	NS	NS	NS	NS	NS	NS	NS	NS	NS	NS	NS	NS	NS	NS	NS	NS	NS	NS	NS	NS	NS	NS	NS	NS	NS	NS
coadread_tcga	TCGA-DM-A1HB-01	NS	NS	NS	NS	NS	NS	NS	NS	NS	NS	NS	NS	NS	NS	NS	NS	NS	NS	NS	NS	NS	NS	NS	NS	NS	NS	NS	NS	NS	NS	NS	NS	NS	NS	NS	NS	NS	NS	NS	NS	NS	NS	NS	NS	NS	NS	NS	NS
coadread_tcga	TCGA-DM-A286-01	NS	NS	NS	NS	NS	NS	NS	NS	NS	NS	NS	NS	NS	NS	NS	NS	NS	NS	NS	NS	NS	NS	NS	NS	NS	NS	NS	NS	NS	NS	NS	NS	NS	NS	NS	NS	NS	NS	NS	NS	NS	NS	NS	NS	NS	NS	NS	NS
coadread_tcga	TCGA-A6-2670-01	NS	NS	NS	NS	NS	NS	NS	NS	NS	NS	NS	NS	NS	NS	NS	NS	NS	NS	NS	NS	NS	NS	NS	NS	NS	NS	NS	NS	NS	NS	NS	NS	NS	NS	NS	NS	NS	NS	NS	NS	NS	NS	NS	NS	NS	NS	NS	NS
coadread_tcga	TCGA-A6-2674-01	WT	WT	WT	WT	Q1661E	WT	WT	WT	WT	WT	WT	WT	WT	WT	WT	WT	WT	WT	WT	WT	WT	WT	WT	WT	WT	WT	WT	WT	WT	WT	WT	WT	WT	WT	WT	WT	WT	WT	WT	WT	WT	WT	WT	WT	WT	WT	WT	WT
coadread_tcga	TCGA-A6-2677-01	WT	R758Sfs*104	WT	WT	WT	WT	WT	WT	WT	WT	WT	WT	WT	WT	WT	WT	WT	WT	WT	WT	WT	WT	WT	WT	WT	WT	WT	WT	WT	WT	WT	WT	WT	WT	WT	WT	WT	WT	WT	WT	WT	WT	WT	WT	WT	WT	WT	WT
coadread_tcga	TCGA-A6-2678-01	WT	WT	WT	WT	WT	WT	WT	WT	WT	WT	WT	WT	WT	WT	V3596M	WT	WT	WT	WT	WT	WT	WT	WT	WT	WT	WT	WT	WT	WT	WT	WT	WT	WT	WT	WT	WT	WT	WT	WT	WT	WT	WT	WT	WT	WT	WT	WT	WT
coadread_tcga	TCGA-A6-2683-01	WT	WT	WT	WT	WT	WT	WT	WT	WT	WT	WT	WT	WT	WT	WT	WT	WT	WT	WT	WT	WT	WT	WT	WT	WT	WT	WT	WT	WT	WT	WT	WT	WT	WT	WT	WT	WT	WT	WT	WT	WT	WT	WT	WT	WT	WT	R244C	WT
coadread_dfci_2016	coadread_dfci_2016_1184	WT	WT	WT	WT	WT	WT	WT	WT	WT	WT	WT	WT	WT	WT	WT	WT	WT	WT	WT	WT	WT	WT	WT	WT	WT	WT	WT	WT	WT	WT	WT	WT	WT	WT	WT	WT	WT	WT	WT	WT	WT	WT	WT	WT	WT	WT	WT	WT
coadread_tcga	TCGA-AA-3517-01	WT	WT	WT	WT	WT	WT	WT	WT	WT	WT	WT	WT	WT	WT	WT	WT	WT	WT	WT	WT	WT	WT	WT	WT	WT	WT	WT	WT	WT	WT	WT	WT	WT	WT	WT	WT	WT	WT	WT	WT	WT	WT	WT	WT	WT	WT	WT	WT
coadread_tcga	TCGA-AA-3519-01	WT	WT	WT	WT	WT	WT	WT	WT	WT	WT	WT	WT	WT	WT	WT	WT	WT	WT	WT	WT	WT	WT	WT	WT	WT	WT	WT	WT	WT	WT	WT	WT	WT	WT	WT	WT	WT	WT	F880C	WT	WT	WT	WT	WT	WT	WT	WT	WT
coadread_tcga	TCGA-AA-3520-01	WT	WT	WT	WT	WT	WT	WT	WT	WT	WT	WT	WT	WT	WT	WT	WT	WT	WT	WT	WT	WT	WT	WT	WT	WT	WT	WT	WT	WT	WT	WT	WT	WT	WT	WT	WT	WT	WT	WT	WT	WT	WT	WT	WT	WT	WT	WT	WT
coadread_tcga	TCGA-AA-3521-01	WT	WT	WT	WT	WT	WT	WT	WT	WT	WT	WT	WT	WT	WT	WT	WT	WT	WT	WT	WT	WT	WT	WT	WT	WT	WT	WT	WT	WT	WT	WT	WT	WT	WT	WT	WT	WT	WT	T31I	WT	WT	WT	WT	WT	WT	WT	WT	WT
coadread_tcga	TCGA-AA-3522-01	WT	WT	WT	WT	WT	WT	WT	WT	WT	WT	WT	WT	WT	WT	WT	WT	WT	WT	WT	WT	WT	WT	WT	WT	WT	WT	WT	WT	WT	WT	WT	WT	WT	WT	WT	WT	WT	WT	WT	WT	WT	WT	WT	WT	WT	WT	WT	WT
coadread_tcga	TCGA-AA-3524-01	WT	WT	WT	WT	WT	WT	WT	WT	WT	WT	WT	WT	WT	WT	WT	V1100M	WT	WT	WT	WT	WT	WT	WT	WT	WT	WT	WT	WT	WT	K2125M	WT	WT	WT	WT	WT	WT	WT	WT	WT	WT	WT	WT	WT	WT	WT	WT	WT	WT
coadread_tcga	TCGA-AA-3526-01	WT	WT	WT	WT	WT	WT	WT	WT	WT	WT	WT	WT	WT	WT	WT	WT	WT	WT	WT	WT	WT	WT	WT	WT	WT	WT	WT	WT	WT	WT	WT	WT	WT	WT	WT	WT	WT	WT	WT	WT	WT	WT	WT	WT	WT	WT	WT	WT
coadread_tcga	TCGA-AA-3527-01	WT	WT	WT	WT	WT	WT	WT	WT	WT	WT	WT	WT	WT	WT	WT	WT	WT	WT	WT	WT	WT	D2123H	WT	G525S	WT	WT	WT	WT	WT	V2442I P534L	WT	WT	WT	WT	WT	WT	WT	WT	WT	WT	WT	WT	WT	WT	WT	WT	WT	WT
coadread_dfci_2016	coadread_dfci_2016_3604	WT	WT	WT	WT	WT	WT	WT	R1821H	WT	WT	WT	WT	WT	WT	WT	WT	WT	WT	WT	WT	WT	WT	WT	WT	WT	WT	WT	WT	WT	WT	WT	WT	WT	WT	WT	WT	WT	WT	WT	WT	WT	WT	WT	WT	WT	WT	WT	WT
coadread_tcga	TCGA-AA-3531-01	WT	WT	WT	WT	WT	WT	WT	WT	WT	WT	WT	P439L	WT	WT	WT	WT	WT	WT	WT	WT	WT	WT	WT	WT	WT	WT	WT	WT	WT	WT	WT	WT	WT	WT	WT	WT	WT	WT	WT	WT	WT	WT	WT	WT	WT	WT	WT	WT
coadread_tcga	TCGA-AA-3532-01	WT	WT	WT	WT	WT	WT	WT	WT	WT	WT	WT	WT	WT	WT	WT	WT	WT	WT	WT	WT	WT	WT	WT	WT	P1066L	WT	WT	WT	WT	WT	WT	WT	WT	WT	WT	WT	WT	D1083E	WT	WT	WT	WT	WT	WT	WT	WT	WT	WT
coadread_dfci_2016	coadread_dfci_2016_663	WT	WT	WT	WT	WT	WT	WT	WT	WT	WT	WT	WT	V265I	WT	WT	WT	WT	WT	WT	WT	WT	WT	WT	WT	WT	WT	WT	WT	WT	WT	WT	WT	WT	WT	WT	WT	WT	WT	WT	WT	WT	WT	WT	WT	WT	WT	WT	WT
coadread_tcga	TCGA-AA-3538-01	WT	WT	WT	WT	WT	WT	WT	WT	WT	WT	WT	WT	WT	WT	WT	WT	WT	WT	WT	WT	WT	WT	WT	WT	WT	WT	WT	WT	WT	WT	WT	WT	WT	WT	WT	WT	WT	WT	WT	WT	WT	WT	WT	WT	WT	WT	WT	WT
coadread_tcga	TCGA-AA-3542-01	WT	WT	WT	WT	WT	WT	WT	WT	WT	K1317T	WT	WT	WT	WT	WT	WT	WT	WT	WT	N1821H	WT	F1979C	WT	WT	WT	WT	WT	WT	WT	WT	WT	A2247V	WT	WT	WT	WT	WT	WT	WT	WT	WT	WT	WT	WT	C1129S	WT	S1592F	WT
coadread_tcga	TCGA-AA-3544-01	WT	WT	WT	WT	WT	WT	WT	WT	WT	WT	WT	WT	WT	WT	R2674C	WT	WT	WT	WT	WT	WT	WT	WT	WT	WT	WT	WT	WT	WT	WT	WT	WT	WT	WT	WT	WT	WT	WT	WT	WT	WT	WT	WT	WT	WT	WT	WT	WT
coadread_tcga	TCGA-AA-3548-01	WT	WT	WT	WT	WT	WT	WT	WT	WT	WT	WT	WT	WT	WT	WT	WT	WT	WT	WT	WT	WT	WT	WT	WT	WT	WT	G170R	WT	WT	WT	WT	WT	WT	WT	WT	WT	WT	WT	WT	WT	WT	WT	WT	WT	WT	WT	WT	WT
coadread_tcga	TCGA-AA-3549-01	WT	WT	WT	WT	WT	WT	WT	WT	WT	WT	WT	WT	WT	WT	WT	WT	WT	WT	WT	WT	WT	WT	WT	WT	WT	WT	WT	WT	WT	WT	WT	WT	WT	WT	WT	WT	WT	WT	WT	WT	WT	WT	WT	WT	WT	WT	WT	WT
coadread_tcga	TCGA-AA-3552-01	WT	WT	WT	WT	WT	WT	WT	WT	WT	WT	WT	WT	WT	WT	WT	WT	WT	WT	WT	T1234M	WT	WT	WT	WT	WT	WT	K1058T	WT	WT	WT	WT	WT	WT	WT	WT	WT	WT	WT	WT	WT	WT	WT	WT	WT	WT	WT	WT	WT
coadread_tcga	TCGA-AA-3553-01	WT	WT	WT	WT	WT	WT	WT	WT	WT	WT	WT	WT	WT	WT	WT	WT	WT	WT	WT	WT	WT	WT	WT	WT	WT	WT	WT	WT	WT	WT	WT	WT	WT	WT	WT	WT	WT	WT	WT	WT	WT	WT	WT	WT	WT	WT	WT	WT
coadread_tcga	TCGA-AA-3555-01	WT	R646*	WT	WT	WT	WT	P198L S1661*	D2410N	WT	R1193C E801K	WT	WT	WT	WT	WT	WT	WT	WT	WT	I2570=	R854H	WT	WT	R371G	F2168V	WT	Y1220H	F1915L	WT	A2272D	WT	WT	WT	WT	WT	WT	WT	F2149L	WT	WT	WT	WT	WT	WT	I1037M I85M	WT	WT	WT
coadread_tcga	TCGA-AA-3556-01	WT	R797*	WT	WT	WT	WT	WT	WT	WT	WT	WT	WT	WT	WT	WT	WT	WT	WT	WT	WT	WT	WT	WT	WT	WT	WT	WT	WT	WT	WT	WT	WT	WT	WT	WT	WT	WT	WT	WT	WT	WT	WT	WT	WT	WT	WT	WT	WT
coadread_tcga	TCGA-AA-3558-01	WT	WT	WT	WT	WT	WT	WT	WT	WT	A401V	WT	WT	WT	WT	Q2903P	WT	WT	WT	WT	WT	WT	WT	WT	WT	WT	WT	G420=	Y73F	WT	WT	WT	WT	WT	WT	WT	WT	WT	WT	WT	WT	WT	WT	WT	WT	WT	WT	WT	WT
coadread_tcga	TCGA-AA-3560-01	WT	WT	WT	WT	WT	WT	WT	WT	WT	WT	WT	WT	WT	WT	WT	WT	WT	WT	WT	WT	WT	WT	WT	WT	WT	WT	WT	WT	WT	WT	WT	WT	WT	WT	WT	WT	WT	WT	WT	WT	WT	WT	WT	WT	WT	WT	WT	WT
coadread_tcga	TCGA-AA-3561-01	WT	WT	WT	WT	WT	WT	WT	WT	WT	WT	WT	WT	WT	WT	WT	WT	WT	WT	WT	WT	WT	WT	WT	WT	WT	WT	WT	WT	WT	WT	WT	WT	WT	WT	WT	WT	WT	WT	WT	WT	WT	WT	WT	WT	WT	WT	WT	WT
coadread_tcga	TCGA-AA-3562-01	WT	WT	WT	WT	WT	WT	WT	WT	WT	WT	WT	WT	WT	WT	WT	WT	WT	WT	WT	WT	WT	WT	WT	WT	WT	WT	WT	WT	WT	WT	WT	WT	WT	WT	WT	WT	WT	WT	WT	WT	WT	WT	WT	WT	WT	WT	WT	WT
coadread_dfci_2016	coadread_dfci_2016_191	WT	WT	WT	WT	WT	WT	WT	WT	WT	WT	WT	WT	WT	WT	WT	WT	WT	WT	WT	WT	WT	WT	WT	WT	WT	WT	WT	WT	WT	WT	WT	WT	WT	T2144R	WT	WT	WT	WT	WT	WT	WT	WT	WT	WT	WT	WT	WT	WT
coadread_tcga	TCGA-A6-2676-01	WT	WT	WT	WT	R2170W	WT	I1071V	WT	WT	WT	WT	WT	WT	WT	WT	WT	WT	WT	R2188C	WT	WT	WT	WT	L2137del	WT	WT	WT	WT	R1036* R79C	WT	WT	Q2333H	WT	WT	WT	WT	WT	WT	WT	WT	WT	V580G	WT	WT	WT	WT	N3089S	WT
coadread_tcga	TCGA-AA-3971-01	WT	WT	WT	WT	WT	WT	WT	WT	WT	WT	WT	WT	WT	WT	WT	WT	WT	WT	WT	WT	WT	WT	WT	WT	WT	WT	WT	WT	WT	WT	WT	WT	WT	WT	WT	WT	WT	WT	WT	WT	WT	WT	WT	WT	WT	WT	WT	WT
coadread_tcga	TCGA-AA-3514-01	WT	WT	WT	WT	WT	WT	WT	WT	WT	WT	WT	WT	WT	WT	WT	WT	WT	WT	WT	T2713M	WT	WT	WT	WT	WT	WT	WT	WT	WT	WT	WT	WT	WT	WT	WT	WT	WT	WT	WT	WT	WT	WT	WT	WT	WT	WT	WT	WT
coadread_tcga	TCGA-AA-3986-01	WT	WT	WT	G626R	WT	WT	WT	WT	WT	WT	WT	WT	WT	WT	WT	WT	WT	WT	WT	WT	WT	WT	WT	WT	WT	WT	WT	WT	WT	WT	WT	WT	WT	WT	WT	WT	WT	WT	WT	WT	WT	WT	WT	WT	WT	WT	WT	WT
coadread_dfci_2016	coadread_dfci_2016_1204	D1613G	WT	WT	WT	WT	WT	WT	WT	WT	WT	WT	S1251R	WT	WT	WT	WT	WT	WT	WT	WT	WT	WT	WT	WT	WT	WT	WT	WT	WT	WT	WT	WT	WT	WT	WT	WT	WT	WT	WT	WT	WT	WT	WT	WT	WT	WT	WT	WT
coadread_tcga	TCGA-AA-3554-01	WT	R413H	WT	WT	WT	WT	WT	WT	WT	WT	WT	WT	WT	WT	G3588V	WT	WT	WT	WT	R1164H	WT	P2420L	WT	WT	WT	WT	A1305V A1162V	WT	WT	WT	WT	WT	WT	WT	WT	WT	WT	WT	WT	WT	WT	WT	WT	WT	WT	WT	WT	WT
coadread_tcga	TCGA-AA-A00A-01	WT	WT	WT	WT	WT	WT	WT	WT	WT	WT	WT	WT	WT	WT	WT	WT	WT	WT	WT	WT	WT	WT	WT	WT	WT	WT	WT	WT	WT	Q2020P	WT	WT	WT	WT	WT	WT	WT	WT	WT	WT	WT	WT	WT	WT	WT	WT	WT	WT
coadread_tcga	TCGA-AA-A00D-01	WT	WT	WT	WT	WT	WT	WT	WT	WT	WT	WT	WT	WT	WT	WT	WT	WT	WT	WT	WT	WT	WT	WT	WT	WT	WT	V1175M	WT	WT	WT	WT	WT	WT	WT	WT	WT	WT	WT	WT	WT	WT	WT	WT	WT	WT	WT	WT	WT
coadread_tcga	TCGA-AA-A00E-01	P2423Q	WT	WT	WT	WT	WT	WT	WT	WT	A725T V427A	WT	WT	WT	WT	WT	R546H	WT	WT	WT	WT	R1795M A227T	WT	WT	WT	WT	WT	WT	WT	T352M G1473V	WT	WT	WT	WT	D1586G R2053H	WT	WT	WT	WT	T203M	WT	WT	WT	WT	WT	WT	WT	T2760P	WT
coadread_tcga	TCGA-AA-A00F-01	WT	WT	WT	WT	WT	WT	WT	WT	WT	WT	WT	WT	WT	WT	WT	WT	WT	WT	WT	WT	WT	WT	WT	WT	WT	WT	WT	W3054C	WT	WT	WT	WT	WT	WT	WT	WT	WT	WT	WT	WT	WT	WT	WT	WT	WT	WT	WT	WT
coadread_tcga	TCGA-AA-A00J-01	G4355D	R306*	WT	S450Y	WT	WT	P1624Q	WT	WT	WT	WT	I1646T T2405= G2966V	WT	WT	WT	WT	WT	WT	WT	WT	R3193L Y1980C	R2487Q	WT	D1112Y	WT	WT	N1400H	WT	V242M	Y2172H D470G	WT	K1058N D1837G	L690I	WT	WT	WT	WT	WT	WT	R1146H	WT	WT	WT	WT	WT	G1342*	N1938I	WT
coadread_tcga	TCGA-AA-A00K-01	WT	WT	WT	K207*	WT	WT	WT	WT	WT	WT	WT	WT	WT	WT	R2283W	R564W	WT	WT	WT	WT	WT	WT	WT	WT	WT	WT	WT	WT	WT	WT	WT	WT	WT	WT	WT	WT	WT	WT	WT	WT	WT	WT	WT	WT	WT	WT	WT	WT
coadread_tcga	TCGA-AA-A00L-01	WT	WT	WT	WT	WT	WT	WT	WT	WT	WT	WT	S1251R	WT	WT	WT	WT	WT	WT	WT	WT	WT	WT	WT	WT	WT	WT	WT	WT	WT	WT	WT	WT	WT	WT	WT	WT	WT	WT	WT	WT	WT	WT	WT	WT	WT	WT	WT	WT
coadread_dfci_2016	coadread_dfci_2016_3111	WT	WT	WT	WT	WT	WT	WT	WT	WT	WT	WT	WT	WT	WT	WT	WT	WT	WT	WT	WT	WT	WT	WT	WT	WT	WT	WT	WT	WT	WT	WT	WT	WT	WT	WT	WT	WT	WT	WT	WT	WT	WT	WT	WT	WT	WT	WT	WT
coadread_dfci_2016	coadread_dfci_2016_356	WT	WT	WT	WT	WT	WT	WT	WT	WT	WT	WT	WT	WT	WT	WT	WT	WT	WT	S1646F	WT	WT	WT	WT	WT	WT	WT	WT	WT	WT	WT	WT	WT	WT	WT	WT	WT	WT	WT	WT	WT	WT	WT	WT	WT	WT	WT	WT	WT
coadread_tcga	TCGA-AA-A00U-01	WT	WT	WT	WT	WT	WT	WT	WT	WT	WT	WT	WT	WT	WT	WT	WT	WT	WT	WT	WT	WT	WT	WT	WT	WT	WT	WT	WT	WT	K2301N	WT	WT	WT	WT	WT	WT	WT	WT	WT	WT	WT	WT	WT	WT	I149N	WT	WT	WT
coadread_tcga	TCGA-AA-A00W-01	WT	WT	WT	WT	WT	WT	WT	WT	WT	WT	WT	WT	WT	WT	WT	WT	WT	WT	WT	WT	WT	WT	WT	WT	WT	WT	WT	WT	WT	WT	WT	WT	WT	WT	WT	WT	WT	WT	WT	WT	WT	WT	WT	WT	WT	WT	WT	WT
coadread_tcga	TCGA-AA-A00Z-01	WT	WT	WT	WT	WT	WT	WT	WT	WT	WT	WT	WT	WT	WT	WT	WT	WT	WT	WT	WT	L828V	WT	WT	WT	WT	WT	WT	WT	WT	WT	WT	WT	WT	WT	WT	WT	WT	WT	WT	WT	WT	WT	WT	WT	WT	WT	WT	WT
coadread_tcga	TCGA-AA-A01F-01	WT	R103Q	WT	WT	WT	WT	WT	WT	WT	WT	WT	WT	WT	WT	WT	WT	WT	WT	WT	WT	WT	WT	WT	WT	WT	WT	WT	WT	WT	WT	WT	WT	WT	WT	WT	WT	WT	WT	WT	WT	WT	WT	WT	WT	WT	WT	WT	WT
coadread_tcga	TCGA-AA-A01G-01	WT	WT	WT	WT	WT	WT	WT	WT	WT	WT	WT	WT	WT	WT	WT	G1094S	WT	WT	WT	D2304N	WT	WT	WT	WT	WT	WT	WT	WT	WT	WT	WT	WT	WT	WT	WT	WT	WT	WT	WT	WT	WT	WT	WT	WT	WT	WT	WT	WT
coadread_tcga	TCGA-AA-A01Q-01	WT	R1007Tfs*2 R753S	WT	R879C	L696P	WT	WT	WT	WT	T1281M	WT	WT	A1976T	WT	WT	WT	WT	WT	WT	R999H	WT	WT	WT	WT	WT	WT	WT	WT	WT	WT	WT	Y793C S1434L	A556T	WT	WT	WT	WT	WT	WT	WT	WT	WT	WT	WT	WT	E65Rfs*34	WT	WT
coadread_tcga	TCGA-A6-A565-01	NS	NS	NS	NS	NS	NS	NS	NS	NS	NS	NS	NS	NS	NS	NS	NS	NS	NS	NS	NS	NS	NS	NS	NS	NS	NS	NS	NS	NS	NS	NS	NS	NS	NS	NS	NS	NS	NS	NS	NS	NS	NS	NS	NS	NS	NS	NS	NS
coadread_tcga	TCGA-A6-A566-01	NS	NS	NS	NS	NS	NS	NS	NS	NS	NS	NS	NS	NS	NS	NS	NS	NS	NS	NS	NS	NS	NS	NS	NS	NS	NS	NS	NS	NS	NS	NS	NS	NS	NS	NS	NS	NS	NS	NS	NS	NS	NS	NS	NS	NS	NS	NS	NS
coadread_tcga	TCGA-A6-A567-01	NS	NS	NS	NS	NS	NS	NS	NS	NS	NS	NS	NS	NS	NS	NS	NS	NS	NS	NS	NS	NS	NS	NS	NS	NS	NS	NS	NS	NS	NS	NS	NS	NS	NS	NS	NS	NS	NS	NS	NS	NS	NS	NS	NS	NS	NS	NS	NS
coadread_tcga	TCGA-A6-A56B-01	NS	NS	NS	NS	NS	NS	NS	NS	NS	NS	NS	NS	NS	NS	NS	NS	NS	NS	NS	NS	NS	NS	NS	NS	NS	NS	NS	NS	NS	NS	NS	NS	NS	NS	NS	NS	NS	NS	NS	NS	NS	NS	NS	NS	NS	NS	NS	NS
coadread_tcga	TCGA-A6-A5ZU-01	NS	NS	NS	NS	NS	NS	NS	NS	NS	NS	NS	NS	NS	NS	NS	NS	NS	NS	NS	NS	NS	NS	NS	NS	NS	NS	NS	NS	NS	NS	NS	NS	NS	NS	NS	NS	NS	NS	NS	NS	NS	NS	NS	NS	NS	NS	NS	NS
coadread_tcga	TCGA-AD-A5EJ-01	NS	NS	NS	NS	NS	NS	NS	NS	NS	NS	NS	NS	NS	NS	NS	NS	NS	NS	NS	NS	NS	NS	NS	NS	NS	NS	NS	NS	NS	NS	NS	NS	NS	NS	NS	NS	NS	NS	NS	NS	NS	NS	NS	NS	NS	NS	NS	NS
coadread_tcga	TCGA-AD-A5EK-01	NS	NS	NS	NS	NS	NS	NS	NS	NS	NS	NS	NS	NS	NS	NS	NS	NS	NS	NS	NS	NS	NS	NS	NS	NS	NS	NS	NS	NS	NS	NS	NS	NS	NS	NS	NS	NS	NS	NS	NS	NS	NS	NS	NS	NS	NS	NS	NS
coadread_tcga	TCGA-AY-A54L-01	NS	NS	NS	NS	NS	NS	NS	NS	NS	NS	NS	NS	NS	NS	NS	NS	NS	NS	NS	NS	NS	NS	NS	NS	NS	NS	NS	NS	NS	NS	NS	NS	NS	NS	NS	NS	NS	NS	NS	NS	NS	NS	NS	NS	NS	NS	NS	NS
coadread_tcga	TCGA-NH-A50T-01	NS	NS	NS	NS	NS	NS	NS	NS	NS	NS	NS	NS	NS	NS	NS	NS	NS	NS	NS	NS	NS	NS	NS	NS	NS	NS	NS	NS	NS	NS	NS	NS	NS	NS	NS	NS	NS	NS	NS	NS	NS	NS	NS	NS	NS	NS	NS	NS
coadread_tcga	TCGA-NH-A50V-01	NS	NS	NS	NS	NS	NS	NS	NS	NS	NS	NS	NS	NS	NS	NS	NS	NS	NS	NS	NS	NS	NS	NS	NS	NS	NS	NS	NS	NS	NS	NS	NS	NS	NS	NS	NS	NS	NS	NS	NS	NS	NS	NS	NS	NS	NS	NS	NS
coadread_tcga	TCGA-QG-A5YV-01	NS	NS	NS	NS	NS	NS	NS	NS	NS	NS	NS	NS	NS	NS	NS	NS	NS	NS	NS	NS	NS	NS	NS	NS	NS	NS	NS	NS	NS	NS	NS	NS	NS	NS	NS	NS	NS	NS	NS	NS	NS	NS	NS	NS	NS	NS	NS	NS
coadread_tcga	TCGA-QG-A5YW-01	NS	NS	NS	NS	NS	NS	NS	NS	NS	NS	NS	NS	NS	NS	NS	NS	NS	NS	NS	NS	NS	NS	NS	NS	NS	NS	NS	NS	NS	NS	NS	NS	NS	NS	NS	NS	NS	NS	NS	NS	NS	NS	NS	NS	NS	NS	NS	NS
coadread_tcga	TCGA-QG-A5YX-01	NS	NS	NS	NS	NS	NS	NS	NS	NS	NS	NS	NS	NS	NS	NS	NS	NS	NS	NS	NS	NS	NS	NS	NS	NS	NS	NS	NS	NS	NS	NS	NS	NS	NS	NS	NS	NS	NS	NS	NS	NS	NS	NS	NS	NS	NS	NS	NS
coadread_tcga	TCGA-QG-A5Z1-01	NS	NS	NS	NS	NS	NS	NS	NS	NS	NS	NS	NS	NS	NS	NS	NS	NS	NS	NS	NS	NS	NS	NS	NS	NS	NS	NS	NS	NS	NS	NS	NS	NS	NS	NS	NS	NS	NS	NS	NS	NS	NS	NS	NS	NS	NS	NS	NS
coadread_tcga	TCGA-QG-A5Z2-01	NS	NS	NS	NS	NS	NS	NS	NS	NS	NS	NS	NS	NS	NS	NS	NS	NS	NS	NS	NS	NS	NS	NS	NS	NS	NS	NS	NS	NS	NS	NS	NS	NS	NS	NS	NS	NS	NS	NS	NS	NS	NS	NS	NS	NS	NS	NS	NS
coadread_tcga	TCGA-AA-A004-01	WT	WT	WT	WT	WT	WT	WT	WT	WT	WT	WT	WT	WT	WT	WT	WT	WT	WT	WT	WT	WT	WT	WT	R491H	WT	WT	WT	WT	WT	K209R	WT	WT	WT	WT	WT	WT	WT	WT	WT	WT	WT	WT	WT	R1112W	WT	WT	WT	WT
coadread_tcga	TCGA-AA-A00N-01	R1627H K1926N	R1341*	WT	A860V	WT	W1127* G497* R2002*	WT	F2936L A511T V3072A	E2231K K3103N K547N K2744N	WT	WT	WT	WT	WT	D2359Y	WT	E4454K	WT	P430L	R717C	S2420P T2138A S1467F	WT	R4504C K1797N	F1845S	Y1247C	R2025H K496R	T1096A	E1564*	D1247G	D91Y	WT	L2687I C346R L2861I	WT	WT	R1195W P983S E1403K R1576*	WT	L1158I	P2345L L1731I D362N	WT	WT	WT	R784Q	WT	H987N E861D	E1041D	T297A	R1183Q G3327V	E146K R2769* E4128K N1669H
coadread_tcga	TCGA-AA-A00O-01	WT	WT	WT	WT	WT	WT	WT	WT	WT	WT	WT	WT	WT	WT	WT	WT	WT	WT	WT	WT	WT	WT	WT	WT	WT	WT	WT	WT	WT	WT	WT	WT	WT	R1839S	WT	WT	WT	WT	WT	WT	WT	WT	WT	WT	WT	WT	WT	WT
coadread_tcga	TCGA-AA-A010-01	R1713H G16* K1964N I2609S T3561M	R1345*	L3615P	S750* G327R	Q1594H	E510* E1071* E1145D S3825F D4015Y	T301M K1607T N592S E1927* S1692T A552D	R146Q F2475V X551_splice	R2298K K3570T S5232R A5873V	S781Y	A4222V E695D	V1156Gfs*14 D1275G F2846S	F1823C	R4043H E815D E2676* X96_splice X3334_splice X3735_splice	S3146Y D2619E R707H	X1299_splice	D2382N E3538D N652H	WT	L1698I S1738L	P113L S1280L	A3032T Q2632H R1328I	K2849N S2260Y E1935* X2003_splice	S4937Y S2559F P4333T	WT	Y3390C L2944I P2875L S625P	E2493K A1500V D918A S469I R56I	R572Q R36Q D192N H513N X1549_splice	E223* X296_splice	WT	V2046A S1027I K240T	S1194L G1596D	R499C R1802C E2754*	WT	S506Y	N1492D	T800M L544F	Y625D	F2149L E2261* D2018Y D1160Y A895T	WT	WT	WT	A2109S R842S G353D	WT	E349K R284H	R1102M E533* L318F	H2143N A2610V	L3041I F2850L F2655L R1181C V84D	E1479D E1350* F693C D413Y L81I
coadread_tcga	TCGA-AA-A017-01	WT	WT	WT	WT	WT	WT	WT	WT	WT	WT	WT	R443Q	WT	WT	WT	WT	WT	WT	WT	WT	WT	R230C	WT	WT	WT	WT	WT	WT	WT	WT	WT	WT	WT	WT	WT	WT	WT	WT	WT	WT	WT	WT	WT	WT	WT	WT	WT	WT
coadread_tcga	TCGA-AA-A01C-01	NS	NS	NS	NS	NS	NS	NS	NS	NS	NS	NS	NS	NS	NS	NS	NS	NS	NS	NS	NS	NS	NS	NS	NS	NS	NS	NS	NS	NS	NS	NS	NS	NS	NS	NS	NS	NS	NS	NS	NS	NS	NS	NS	NS	NS	NS	NS	NS
coadread_tcga	TCGA-AA-A01D-01	WT	WT	WT	WT	WT	WT	WT	WT	WT	WT	WT	WT	WT	WT	WT	WT	WT	WT	WT	WT	WT	WT	WT	WT	WT	WT	WT	WT	WT	WT	WT	WT	WT	WT	WT	WT	WT	WT	WT	WT	WT	V722M	WT	WT	WT	WT	WT	WT
coadread_tcga	TCGA-AA-A01I-01	WT	WT	WT	WT	WT	WT	WT	WT	WT	WT	WT	WT	WT	WT	WT	WT	WT	WT	WT	WT	WT	R1849S	WT	WT	WT	R1965H	WT	WT	WT	WT	WT	WT	WT	WT	T2202M	WT	WT	WT	WT	WT	WT	WT	WT	WT	WT	WT	WT	WT
coadread_tcga	TCGA-AA-A01K-01	WT	WT	WT	WT	WT	WT	WT	WT	WT	WT	WT	WT	WT	WT	S759N	WT	WT	WT	WT	WT	WT	WT	WT	WT	WT	WT	WT	WT	WT	WT	WT	WT	WT	WT	WT	WT	WT	WT	WT	WT	WT	WT	WT	WT	K587N	WT	WT	WT
coadread_tcga	TCGA-AA-A024-01	WT	WT	WT	WT	WT	WT	WT	WT	WT	WT	WT	WT	WT	WT	WT	WT	WT	WT	WT	WT	WT	WT	WT	WT	WT	WT	WT	WT	WT	WT	WT	WT	WT	WT	WT	WT	WT	WT	WT	WT	WT	WT	WT	WT	WT	WT	WT	WT
coadread_tcga	TCGA-AA-A029-01	WT	WT	WT	WT	WT	WT	WT	WT	WT	WT	WT	WT	WT	V4788M	WT	WT	WT	WT	WT	WT	WT	WT	WT	WT	WT	WT	WT	WT	WT	WT	WT	WT	WT	WT	WT	WT	WT	WT	WT	WT	WT	WT	WT	WT	WT	WT	WT	WT
coadread_tcga	TCGA-AA-A02E-01	NS	NS	NS	NS	NS	NS	NS	NS	NS	NS	NS	NS	NS	NS	NS	NS	NS	NS	NS	NS	NS	NS	NS	NS	NS	NS	NS	NS	NS	NS	NS	NS	NS	NS	NS	NS	NS	NS	NS	NS	NS	NS	NS	NS	NS	NS	NS	NS
coadread_tcga	TCGA-AA-A02F-01	WT	WT	WT	WT	WT	WT	WT	WT	WT	WT	WT	WT	WT	WT	WT	WT	WT	WT	WT	WT	WT	E293D	WT	WT	WT	WT	WT	WT	WT	WT	WT	WT	WT	WT	WT	WT	WT	WT	WT	WT	WT	WT	WT	WT	WT	WT	WT	WT
coadread_tcga	TCGA-AA-A02H-01	WT	WT	WT	WT	WT	WT	WT	WT	WT	WT	WT	WT	WT	WT	WT	WT	WT	WT	WT	WT	WT	WT	WT	WT	WT	WT	WT	WT	WT	WT	WT	WT	WT	WT	WT	WT	WT	WT	WT	WT	WT	WT	WT	WT	WT	WT	WT	WT
coadread_tcga	TCGA-AA-A02J-01	WT	WT	WT	WT	WT	WT	WT	WT	WT	WT	WT	WT	WT	WT	WT	WT	WT	WT	WT	WT	WT	WT	WT	WT	WT	WT	WT	WT	F1659L	WT	WT	WT	WT	WT	WT	WT	WT	WT	WT	WT	WT	WT	WT	WT	WT	WT	WT	WT
coadread_tcga	TCGA-AA-A02R-01	NS	NS	NS	NS	NS	NS	NS	NS	NS	NS	NS	NS	NS	NS	NS	NS	NS	NS	NS	NS	NS	NS	NS	NS	NS	NS	NS	NS	NS	NS	NS	NS	NS	NS	NS	NS	NS	NS	NS	NS	NS	NS	NS	NS	NS	NS	NS	NS
coadread_tcga	TCGA-AA-A02W-01	WT	WT	WT	WT	WT	WT	WT	WT	WT	WT	WT	WT	WT	WT	WT	WT	WT	WT	WT	WT	WT	WT	WT	WT	WT	WT	WT	WT	WT	WT	WT	WT	WT	WT	WT	WT	WT	WT	WT	WT	WT	WT	WT	WT	WT	WT	WT	WT
coadread_dfci_2016	coadread_dfci_2016_3102	WT	WT	WT	WT	WT	WT	WT	WT	WT	WT	WT	WT	WT	WT	WT	WT	WT	WT	WT	WT	WT	WT	WT	WT	WT	WT	WT	WT	WT	WT	WT	WT	WT	WT	WT	WT	WT	WT	WT	WT	WT	WT	WT	WT	WT	WT	WT	WT
coadread_tcga	TCGA-AA-3666-01	WT	WT	WT	WT	WT	WT	WT	WT	WT	WT	WT	WT	WT	Q3859H	WT	WT	WT	WT	WT	WT	WT	WT	WT	WT	WT	WT	WT	WT	WT	WT	WT	WT	WT	WT	WT	WT	WT	WT	WT	WT	WT	WT	WT	WT	WT	WT	WT	WT
coadread_tcga	TCGA-AA-3667-01	WT	WT	WT	WT	WT	WT	WT	V163F	S2426N	WT	WT	WT	WT	H4032Q	WT	WT	WT	WT	WT	WT	WT	WT	WT	WT	WT	WT	WT	WT	WT	WT	WT	WT	WT	WT	WT	WT	WT	WT	WT	WT	WT	WT	WT	WT	WT	WT	WT	WT
coadread_dfci_2016	coadread_dfci_2016_2283	WT	WT	WT	WT	WT	WT	WT	WT	WT	WT	WT	WT	WT	WT	WT	WT	WT	WT	WT	WT	WT	WT	WT	WT	WT	T63M	WT	WT	WT	WT	WT	WT	WT	WT	WT	WT	WT	WT	WT	WT	WT	WT	WT	WT	WT	WT	WT	WT
coadread_tcga	TCGA-AA-3673-01	WT	WT	WT	WT	WT	WT	WT	WT	WT	WT	WT	WT	WT	WT	WT	WT	WT	WT	WT	WT	WT	WT	WT	WT	WT	WT	WT	WT	WT	WT	WT	WT	WT	WT	WT	WT	WT	WT	WT	WT	WT	WT	V1100M	S763T	WT	WT	WT	WT
coadread_tcga	TCGA-AA-3675-01	NS	NS	NS	NS	NS	NS	NS	NS	NS	NS	NS	NS	NS	NS	NS	NS	NS	NS	NS	NS	NS	NS	NS	NS	NS	NS	NS	NS	NS	NS	NS	NS	NS	NS	NS	NS	NS	NS	NS	NS	NS	NS	NS	NS	NS	NS	NS	NS
coadread_tcga	TCGA-AA-3678-01	WT	WT	WT	WT	WT	T1391K	WT	WT	WT	WT	WT	WT	WT	WT	WT	WT	WT	WT	WT	WT	WT	WT	WT	WT	WT	WT	WT	WT	WT	WT	WT	WT	WT	WT	WT	R899H	A489T	WT	WT	WT	WT	WT	WT	WT	WT	WT	WT	WT
coadread_tcga	TCGA-AA-3679-01	WT	WT	WT	WT	WT	WT	WT	WT	WT	WT	WT	WT	WT	WT	WT	WT	WT	WT	WT	WT	WT	WT	WT	WT	WT	WT	WT	WT	WT	WT	WT	WT	WT	WT	WT	WT	WT	WT	WT	WT	WT	WT	WT	WT	H326Y	WT	WT	WT
coadread_tcga	TCGA-AA-3680-01	WT	WT	WT	WT	WT	WT	WT	WT	WT	WT	WT	WT	WT	WT	WT	WT	WT	WT	WT	WT	WT	WT	WT	WT	F1176L	WT	WT	WT	WT	WT	WT	V2281Cfs*12	WT	WT	WT	WT	WT	WT	WT	WT	WT	WT	WT	WT	WT	WT	WT	WT
coadread_tcga	TCGA-AA-3681-01	WT	WT	WT	WT	WT	WT	WT	WT	WT	WT	WT	WT	WT	WT	WT	WT	WT	WT	WT	WT	WT	WT	WT	WT	WT	WT	WT	WT	WT	WT	WT	WT	WT	WT	R2228H	WT	WT	WT	WT	WT	WT	WT	WT	WT	WT	WT	WT	WT
coadread_tcga	TCGA-AA-3684-01	WT	WT	WT	M1375I	WT	WT	WT	WT	WT	WT	WT	A159V	WT	WT	L3216F	WT	WT	WT	WT	WT	WT	WT	WT	WT	WT	WT	WT	WT	WT	WT	WT	WT	WT	WT	WT	WT	WT	WT	WT	WT	WT	WT	WT	WT	WT	S1756G	WT	WT
coadread_tcga	TCGA-AA-3685-01	WT	WT	WT	WT	WT	WT	WT	WT	WT	WT	WT	WT	WT	WT	WT	WT	WT	WT	WT	WT	WT	WT	WT	WT	WT	WT	WT	WT	WT	WT	WT	WT	WT	WT	WT	WT	WT	WT	WT	WT	WT	WT	WT	WT	WT	WT	WT	WT
coadread_tcga	TCGA-AA-3688-01	WT	WT	WT	WT	WT	WT	WT	WT	WT	WT	WT	WT	WT	F3939L	WT	WT	WT	WT	WT	WT	WT	WT	WT	WT	WT	WT	WT	WT	WT	WT	WT	WT	WT	WT	WT	WT	WT	WT	WT	WT	WT	WT	WT	WT	WT	WT	WT	WT
coadread_tcga	TCGA-AA-3692-01	WT	WT	WT	WT	WT	WT	WT	WT	WT	WT	WT	WT	WT	WT	WT	WT	WT	WT	WT	WT	WT	WT	WT	WT	WT	WT	WT	WT	WT	WT	WT	WT	WT	WT	WT	WT	WT	WT	WT	WT	WT	WT	WT	WT	WT	WT	WT	WT
coadread_tcga	TCGA-AA-3693-01	WT	WT	WT	WT	WT	WT	WT	WT	WT	WT	WT	WT	WT	WT	WT	WT	WT	WT	WT	WT	WT	D2974N	WT	WT	WT	WT	WT	WT	WT	WT	WT	WT	WT	WT	WT	WT	WT	WT	WT	WT	WT	WT	WT	WT	WT	WT	WT	WT
coadread_tcga	TCGA-AA-3695-01	WT	WT	WT	WT	WT	WT	WT	WT	WT	WT	WT	WT	WT	WT	WT	WT	WT	WT	WT	WT	WT	WT	WT	WT	K2147E	WT	WT	WT	WT	WT	WT	WT	WT	WT	WT	WT	WT	WT	A636V	WT	WT	WT	A1510T	WT	WT	WT	WT	WT
coadread_dfci_2016	coadread_dfci_2016_3288	WT	WT	WT	WT	WT	WT	WT	WT	WT	WT	WT	WT	WT	WT	WT	WT	WT	WT	WT	WT	WT	WT	WT	WT	WT	WT	WT	WT	WT	WT	WT	WT	WT	WT	WT	WT	WT	WT	WT	WT	WT	WT	WT	WT	WT	WT	WT	WT
coadread_tcga	TCGA-AA-3715-01	WT	WT	WT	WT	WT	I837F	L347R	N1245K	S769F R3430M D6691N	R1193H I646T	WT	WT	R236*	WT	WT	R191C	M2864T	WT	N1995S	WT	WT	E245K	WT	P1422S	A1989V A2049V	WT	K1058T	A3011T M1888T R1194* P59H	V656I	WT	V1665A H2023R	WT	R1182W	WT	WT	WT	WT	WT	WT	WT	WT	R1952H	WT	Q1038K	T195P	D1740H	K2535N	WT
coadread_tcga	TCGA-AA-3812-01	WT	WT	WT	WT	WT	WT	WT	WT	WT	WT	WT	WT	WT	WT	WT	WT	WT	WT	D3621N	WT	WT	WT	WT	WT	WT	WT	WT	WT	WT	WT	WT	WT	WT	WT	WT	WT	WT	V1918L	WT	WT	WT	WT	WT	WT	WT	WT	WT	WT
coadread_tcga	TCGA-AA-3814-01	WT	WT	WT	WT	WT	WT	WT	WT	WT	WT	WT	WT	WT	WT	WT	WT	WT	WT	WT	WT	WT	WT	WT	WT	WT	WT	WT	WT	WT	WT	WT	WT	WT	WT	WT	WT	WT	WT	WT	WT	WT	WT	WT	WT	WT	WT	WT	WT
coadread_tcga	TCGA-AA-3818-01	WT	WT	WT	WT	WT	WT	WT	WT	WT	WT	WT	F1370C	WT	WT	WT	WT	WT	WT	WT	WT	WT	WT	WT	WT	R2292C	WT	WT	WT	WT	WT	WT	WT	WT	WT	WT	WT	WT	WT	WT	WT	WT	WT	WT	WT	K864N	WT	WT	WT
coadread_tcga	TCGA-AG-A00H-01	WT	WT	WT	WT	WT	WT	WT	WT	WT	WT	WT	WT	WT	WT	WT	WT	WT	WT	WT	WT	WT	WT	WT	WT	WT	T1619S	WT	WT	WT	WT	WT	WT	WT	WT	WT	WT	WT	WT	WT	WT	WT	WT	WT	WT	WT	WT	WT	WT
coadread_dfci_2016	coadread_dfci_2016_2934	WT	R797*	WT	WT	WT	WT	WT	WT	WT	WT	WT	WT	WT	WT	WT	WT	I4241S	WT	WT	WT	WT	WT	WT	WT	WT	WT	WT	WT	WT	WT	WT	WT	WT	WT	WT	WT	WT	WT	WT	WT	G195S	WT	WT	WT	WT	WT	WT	WT
coadread_tcga	TCGA-AA-3534-01	WT	WT	WT	WT	WT	WT	WT	WT	WT	WT	WT	WT	WT	WT	WT	WT	WT	WT	WT	WT	WT	WT	WT	WT	WT	WT	WT	WT	WT	WT	WT	WT	WT	WT	WT	WT	WT	WT	WT	WT	WT	WT	WT	WT	D786Y	WT	WT	WT
coadread_tcga	TCGA-AA-3837-01	WT	WT	WT	WT	WT	WT	WT	WT	WT	WT	WT	WT	WT	A2656V	WT	WT	WT	WT	WT	WT	WT	WT	K3909E	WT	Q1603E	WT	WT	WT	WT	WT	WT	WT	WT	WT	WT	WT	WT	WT	WT	WT	WT	WT	R23H	WT	WT	WT	WT	WT
coadread_tcga	TCGA-AA-3841-01	NS	NS	NS	NS	NS	NS	NS	NS	NS	NS	NS	NS	NS	NS	NS	NS	NS	NS	NS	NS	NS	NS	NS	NS	NS	NS	NS	NS	NS	NS	NS	NS	NS	NS	NS	NS	NS	NS	NS	NS	NS	NS	NS	NS	NS	NS	NS	NS
coadread_tcga	TCGA-AA-3848-01	WT	WT	A3146P	WT	WT	WT	WT	WT	WT	WT	WT	WT	WT	WT	WT	WT	WT	WT	WT	WT	WT	WT	WT	WT	WT	K831T	WT	WT	WT	WT	WT	WT	WT	WT	WT	WT	WT	WT	WT	WT	WT	WT	WT	WT	WT	WT	WT	WT
coadread_tcga	TCGA-AA-3852-01	WT	WT	WT	WT	WT	WT	WT	WT	WT	WT	WT	WT	WT	WT	WT	WT	WT	WT	WT	WT	WT	WT	WT	WT	WT	WT	WT	WT	WT	WT	WT	WT	WT	WT	WT	WT	F1617I	WT	WT	WT	WT	E1993K	WT	WT	WT	WT	WT	WT
coadread_tcga	TCGA-AA-3854-01	WT	WT	WT	WT	WT	R2189*	WT	WT	WT	WT	WT	WT	WT	WT	WT	D1179N	WT	WT	WT	WT	WT	WT	WT	WT	WT	WT	WT	WT	WT	WT	R437C	WT	WT	WT	WT	WT	WT	WT	WT	WT	WT	WT	WT	WT	WT	WT	WT	WT
coadread_tcga	TCGA-AA-3856-01	WT	WT	WT	WT	WT	WT	WT	WT	WT	R842Q	WT	WT	WT	WT	WT	WT	WT	WT	WT	WT	WT	WT	WT	WT	WT	I530L	WT	WT	WT	WT	WT	WT	WT	WT	WT	WT	WT	WT	WT	WT	WT	WT	WT	WT	WT	WT	WT	WT
coadread_tcga	TCGA-AA-3858-01	WT	WT	WT	WT	WT	WT	WT	WT	WT	WT	WT	WT	WT	WT	WT	S500Y	WT	WT	WT	WT	WT	WT	WT	WT	WT	WT	WT	WT	WT	WT	WT	WT	WT	WT	WT	WT	WT	WT	WT	WT	WT	WT	WT	WT	WT	WT	WT	WT
coadread_tcga	TCGA-AA-3860-01	WT	WT	WT	WT	S1516A	WT	WT	WT	WT	WT	WT	WT	WT	WT	WT	WT	WT	WT	WT	WT	WT	WT	WT	WT	WT	WT	WT	WT	WT	WT	WT	WT	WT	WT	WT	WT	WT	WT	WT	WT	WT	WT	WT	WT	WT	WT	WT	WT
coadread_tcga	TCGA-AA-3875-01	WT	WT	WT	WT	WT	WT	WT	WT	WT	WT	WT	WT	WT	WT	WT	WT	WT	WT	WT	WT	WT	WT	WT	WT	WT	WT	WT	WT	WT	WT	WT	R2383*	WT	S584F	WT	WT	WT	WT	WT	WT	WT	WT	WT	WT	WT	WT	WT	WT
coadread_tcga	TCGA-3L-AA1B-01	NS	NS	NS	NS	NS	NS	NS	NS	NS	NS	NS	NS	NS	NS	NS	NS	NS	NS	NS	NS	NS	NS	NS	NS	NS	NS	NS	NS	NS	NS	NS	NS	NS	NS	NS	NS	NS	NS	NS	NS	NS	NS	NS	NS	NS	NS	NS	NS
coadread_tcga	TCGA-4N-A93T-01	NS	NS	NS	NS	NS	NS	NS	NS	NS	NS	NS	NS	NS	NS	NS	NS	NS	NS	NS	NS	NS	NS	NS	NS	NS	NS	NS	NS	NS	NS	NS	NS	NS	NS	NS	NS	NS	NS	NS	NS	NS	NS	NS	NS	NS	NS	NS	NS
coadread_tcga	TCGA-AY-A69D-01	NS	NS	NS	NS	NS	NS	NS	NS	NS	NS	NS	NS	NS	NS	NS	NS	NS	NS	NS	NS	NS	NS	NS	NS	NS	NS	NS	NS	NS	NS	NS	NS	NS	NS	NS	NS	NS	NS	NS	NS	NS	NS	NS	NS	NS	NS	NS	NS
coadread_tcga	TCGA-AY-A71X-01	NS	NS	NS	NS	NS	NS	NS	NS	NS	NS	NS	NS	NS	NS	NS	NS	NS	NS	NS	NS	NS	NS	NS	NS	NS	NS	NS	NS	NS	NS	NS	NS	NS	NS	NS	NS	NS	NS	NS	NS	NS	NS	NS	NS	NS	NS	NS	NS
coadread_tcga	TCGA-NH-A50U-01	NS	NS	NS	NS	NS	NS	NS	NS	NS	NS	NS	NS	NS	NS	NS	NS	NS	NS	NS	NS	NS	NS	NS	NS	NS	NS	NS	NS	NS	NS	NS	NS	NS	NS	NS	NS	NS	NS	NS	NS	NS	NS	NS	NS	NS	NS	NS	NS
coadread_tcga	TCGA-NH-A5IV-01	NS	NS	NS	NS	NS	NS	NS	NS	NS	NS	NS	NS	NS	NS	NS	NS	NS	NS	NS	NS	NS	NS	NS	NS	NS	NS	NS	NS	NS	NS	NS	NS	NS	NS	NS	NS	NS	NS	NS	NS	NS	NS	NS	NS	NS	NS	NS	NS
coadread_tcga	TCGA-NH-A6GA-01	NS	NS	NS	NS	NS	NS	NS	NS	NS	NS	NS	NS	NS	NS	NS	NS	NS	NS	NS	NS	NS	NS	NS	NS	NS	NS	NS	NS	NS	NS	NS	NS	NS	NS	NS	NS	NS	NS	NS	NS	NS	NS	NS	NS	NS	NS	NS	NS
coadread_tcga	TCGA-NH-A6GB-01	NS	NS	NS	NS	NS	NS	NS	NS	NS	NS	NS	NS	NS	NS	NS	NS	NS	NS	NS	NS	NS	NS	NS	NS	NS	NS	NS	NS	NS	NS	NS	NS	NS	NS	NS	NS	NS	NS	NS	NS	NS	NS	NS	NS	NS	NS	NS	NS
coadread_tcga	TCGA-RU-A8FL-01	NS	NS	NS	NS	NS	NS	NS	NS	NS	NS	NS	NS	NS	NS	NS	NS	NS	NS	NS	NS	NS	NS	NS	NS	NS	NS	NS	NS	NS	NS	NS	NS	NS	NS	NS	NS	NS	NS	NS	NS	NS	NS	NS	NS	NS	NS	NS	NS
coadread_tcga	TCGA-SS-A7HO-01	NS	NS	NS	NS	NS	NS	NS	NS	NS	NS	NS	NS	NS	NS	NS	NS	NS	NS	NS	NS	NS	NS	NS	NS	NS	NS	NS	NS	NS	NS	NS	NS	NS	NS	NS	NS	NS	NS	NS	NS	NS	NS	NS	NS	NS	NS	NS	NS
coadread_tcga	TCGA-T9-A92H-01	NS	NS	NS	NS	NS	NS	NS	NS	NS	NS	NS	NS	NS	NS	NS	NS	NS	NS	NS	NS	NS	NS	NS	NS	NS	NS	NS	NS	NS	NS	NS	NS	NS	NS	NS	NS	NS	NS	NS	NS	NS	NS	NS	NS	NS	NS	NS	NS
coadread_tcga	TCGA-A6-3807-01	WT	WT	WT	WT	WT	WT	WT	WT	WT	WT	WT	R2527H	WT	WT	WT	WT	WT	WT	WT	WT	WT	WT	WT	WT	F1365I	WT	WT	WT	WT	WT	WT	WT	WT	WT	WT	WT	WT	WT	WT	WT	WT	WT	WT	WT	WT	WT	WT	WT
coadread_tcga	TCGA-A6-3808-01	WT	WT	WT	WT	WT	WT	D1227N	WT	WT	WT	WT	WT	WT	WT	WT	WT	WT	WT	WT	WT	WT	WT	R2547Q	WT	WT	WT	WT	WT	WT	WT	WT	WT	WT	WT	WT	WT	WT	WT	WT	WT	WT	R1284H	WT	WT	WT	WT	WT	W3322*
coadread_tcga	TCGA-A6-3809-01	NS	NS	NS	NS	NS	NS	NS	NS	NS	NS	NS	NS	NS	NS	NS	NS	NS	NS	NS	NS	NS	NS	NS	NS	NS	NS	NS	NS	NS	NS	NS	NS	NS	NS	NS	NS	NS	NS	NS	NS	NS	NS	NS	NS	NS	NS	NS	NS
coadread_tcga	TCGA-A6-3810-01	V1590G	WT	WT	WT	WT	WT	P1759H	WT	WT	P1194=	WT	WT	WT	WT	WT	WT	WT	WT	WT	WT	WT	WT	WT	WT	WT	WT	WT	WT	G475S	WT	WT	WT	WT	WT	WT	WT	WT	WT	WT	WT	WT	G1124R	WT	WT	WT	WT	WT	E4082K
coadread_tcga	TCGA-AA-3530-01	WT	WT	WT	WT	WT	F1515S	WT	WT	WT	WT	WT	WT	WT	WT	WT	WT	WT	WT	WT	WT	WT	WT	WT	WT	WT	WT	WT	WT	WT	P1798L	WT	WT	WT	WT	WT	WT	WT	WT	WT	WT	WT	WT	WT	WT	WT	WT	A2477D	WT
coadread_tcga	TCGA-AA-3710-01	WT	WT	WT	K1224N	WT	WT	WT	WT	E4713D	WT	WT	R1408H	E2120V R1301Q	WT	A3616T	WT	WT	WT	WT	WT	WT	WT	P518L	WT	WT	WT	WT	WT	Q635P	WT	WT	WT	WT	R670H	WT	WT	R455Q	WT	WT	WT	WT	WT	WT	WT	WT	WT	G1287*	WT
coadread_tcga	TCGA-AA-3811-01	WT	WT	WT	WT	WT	A2622T	WT	WT	WT	WT	WT	WT	R222W E1751D	WT	WT	WT	D2622E N2590K	WT	WT	WT	V2025A	WT	K4209I S4359T	V822M	WT	WT	WT	WT	WT	WT	E1408*	R1277*	WT	WT	WT	WT	R905C	WT	WT	WT	WT	V1777M	WT	WT	WT	WT	WT	WT
coadread_tcga	TCGA-AA-3815-01	NS	NS	NS	NS	NS	NS	NS	NS	NS	NS	NS	NS	NS	NS	NS	NS	NS	NS	NS	NS	NS	NS	NS	NS	NS	NS	NS	NS	NS	NS	NS	NS	NS	NS	NS	NS	NS	NS	NS	NS	NS	NS	NS	NS	NS	NS	NS	NS
coadread_dfci_2016	coadread_dfci_2016_3545	D720H	WT	WT	WT	WT	WT	WT	WT	WT	WT	WT	WT	WT	WT	WT	WT	WT	WT	WT	WT	WT	WT	WT	WT	WT	WT	WT	WT	WT	WT	WT	WT	WT	WT	WT	WT	WT	WT	WT	WT	WT	WT	WT	WT	WT	WT	WT	WT
coadread_tcga	TCGA-AA-3842-01	WT	WT	WT	WT	WT	WT	WT	WT	WT	WT	WT	WT	WT	WT	WT	WT	WT	WT	WT	WT	WT	WT	WT	WT	WT	WT	WT	WT	WT	WT	WT	WT	WT	WT	WT	WT	WT	WT	WT	WT	WT	WT	WT	WT	E888K	WT	R1381W	WT
coadread_tcga	TCGA-AA-3844-01	WT	WT	WT	WT	WT	WT	WT	WT	WT	WT	WT	WT	WT	WT	WT	WT	WT	WT	WT	WT	WT	WT	WT	R810*	WT	WT	WT	WT	WT	WT	WT	WT	WT	WT	WT	WT	WT	WT	WT	WT	WT	WT	WT	WT	WT	WT	WT	WT
coadread_tcga	TCGA-AA-A01X-01	WT	WT	WT	WT	WT	WT	WT	WT	WT	WT	WT	WT	WT	WT	WT	WT	WT	WT	WT	WT	WT	WT	WT	T1891M	WT	WT	WT	WT	WT	R1546H	WT	WT	WT	WT	WT	WT	WT	WT	WT	WT	WT	WT	WT	WT	WT	WT	WT	WT
coadread_tcga	TCGA-AA-3846-01	WT	WT	WT	WT	WT	WT	WT	WT	WT	WT	WT	WT	WT	D4276N	I3068F	WT	WT	WT	WT	WT	WT	WT	WT	WT	WT	WT	WT	WT	WT	WT	WT	WT	WT	WT	WT	WT	WT	WT	WT	WT	WT	WT	WT	WT	WT	WT	WT	WT
coadread_tcga	TCGA-AG-3901-01	WT	WT	WT	WT	WT	WT	WT	WT	WT	WT	WT	WT	WT	WT	WT	WT	WT	WT	WT	WT	WT	WT	WT	WT	WT	WT	WT	WT	WT	WT	WT	WT	WT	WT	WT	WT	WT	WT	WT	WT	WT	WT	WT	WT	WT	WT	WT	WT
coadread_tcga	TCGA-AA-3851-01	WT	WT	WT	D909N	WT	WT	WT	WT	WT	WT	WT	WT	WT	WT	WT	WT	WT	WT	WT	WT	WT	WT	WT	WT	WT	WT	WT	WT	WT	WT	WT	WT	WT	WT	WT	WT	WT	WT	WT	WT	WT	WT	WT	WT	WT	WT	WT	WT
coadread_tcga	TCGA-AA-3855-01	WT	WT	WT	WT	WT	WT	WT	WT	WT	WT	WT	WT	WT	WT	WT	G637S	WT	WT	WT	WT	WT	WT	WT	WT	WT	WT	WT	WT	WT	WT	WT	WT	WT	WT	WT	WT	WT	WT	WT	WT	WT	WT	WT	WT	WT	WT	WT	WT
coadread_tcga	TCGA-AA-3861-01	NS	NS	NS	NS	NS	NS	NS	NS	NS	NS	NS	NS	NS	NS	NS	NS	NS	NS	NS	NS	NS	NS	NS	NS	NS	NS	NS	NS	NS	NS	NS	NS	NS	NS	NS	NS	NS	NS	NS	NS	NS	NS	NS	NS	NS	NS	NS	NS
coadread_tcga	TCGA-AA-3862-01	NS	NS	NS	NS	NS	NS	NS	NS	NS	NS	NS	NS	NS	NS	NS	NS	NS	NS	NS	NS	NS	NS	NS	NS	NS	NS	NS	NS	NS	NS	NS	NS	NS	NS	NS	NS	NS	NS	NS	NS	NS	NS	NS	NS	NS	NS	NS	NS
coadread_tcga	TCGA-AA-3864-01	R3032H	R808*	R5108C	WT	D2131N G3150R	W1410*	WT	R3223Q	WT	WT	WT	WT	A345T	G2858R	P380L	A62Hfs*11	A2456T	WT	S1122F	T1114M	R1437C	WT	R3028C R4214W	A137T V449I G1620S	WT	T1046Qfs*7	R260*	WT	V89M	WT	V1099I	E1310K	WT	T1939M	R1372H	WT	K2446E	A2583V	H19Y	V1950M	WT	WT	P2277S	WT	WT	G481S	WT	WT
coadread_tcga	TCGA-AA-3866-01	WT	WT	WT	WT	WT	WT	WT	WT	WT	WT	WT	WT	WT	WT	WT	WT	WT	WT	WT	WT	WT	WT	WT	WT	WT	WT	WT	WT	WT	WT	WT	WT	R366*	WT	WT	WT	WT	WT	WT	WT	WT	WT	WT	WT	WT	WT	WT	WT
coadread_tcga	TCGA-AA-3867-01	WT	WT	WT	WT	WT	WT	WT	WT	WT	WT	WT	WT	WT	WT	WT	WT	WT	WT	WT	WT	WT	WT	WT	WT	WT	WT	WT	WT	WT	WT	WT	WT	WT	WT	WT	V593M	WT	WT	WT	WT	WT	WT	WT	WT	WT	R1003H	WT	WT
coadread_tcga	TCGA-AA-3869-01	WT	WT	WT	WT	WT	WT	WT	WT	WT	WT	WT	WT	WT	WT	WT	WT	WT	WT	WT	WT	WT	WT	WT	WT	WT	WT	WT	WT	WT	WT	WT	WT	WT	WT	WT	WT	WT	WT	WT	WT	WT	WT	WT	WT	WT	WT	WT	WT
coadread_tcga	TCGA-AA-3870-01	WT	WT	WT	WT	WT	E2497V	WT	WT	E2533*	WT	WT	WT	WT	WT	WT	WT	WT	WT	WT	WT	WT	WT	WT	WT	WT	WT	WT	WT	WT	WT	WT	WT	WT	WT	WT	WT	WT	WT	WT	WT	WT	WT	WT	WT	WT	WT	WT	WT
coadread_tcga	TCGA-AA-3872-01	WT	WT	WT	WT	WT	WT	WT	WT	WT	WT	WT	WT	WT	WT	S1736=	WT	WT	WT	WT	WT	WT	WT	WT	WT	WT	WT	WT	WT	WT	WT	WT	WT	WT	WT	WT	WT	WT	WT	WT	WT	WT	WT	WT	WT	WT	WT	WT	WT
coadread_tcga	TCGA-AA-3529-01	WT	WT	WT	WT	WT	WT	WT	T3109S	WT	WT	WT	WT	WT	WT	WT	WT	WT	WT	WT	WT	WT	WT	WT	WT	WT	WT	WT	WT	WT	WT	WT	WT	WT	WT	WT	WT	WT	WT	WT	WT	WT	WT	WT	WT	WT	WT	WT	WT
coadread_tcga	TCGA-AA-3930-01	WT	WT	WT	WT	WT	WT	WT	WT	WT	WT	WT	WT	WT	WT	WT	WT	WT	WT	WT	WT	WT	WT	WT	WT	WT	WT	WT	WT	WT	WT	WT	WT	WT	WT	WT	D68N	WT	WT	WT	WT	WT	WT	WT	WT	WT	WT	WT	WT
coadread_tcga	TCGA-AA-3939-01	WT	WT	WT	WT	WT	WT	L686Q	WT	WT	WT	WT	WT	WT	WT	WT	WT	WT	WT	WT	WT	WT	WT	WT	WT	WT	R1301L	WT	WT	WT	WT	WT	WT	WT	WT	WT	WT	WT	WT	WT	WT	WT	WT	WT	WT	T716I	WT	WT	WT
coadread_tcga	TCGA-AA-3941-01	WT	WT	WT	WT	WT	WT	WT	WT	WT	WT	WT	WT	WT	WT	WT	WT	WT	WT	WT	WT	WT	WT	WT	WT	WT	WT	WT	WT	WT	WT	WT	WT	WT	WT	WT	WT	WT	F368L	WT	WT	WT	WT	WT	WT	WT	WT	WT	A4979T
coadread_tcga	TCGA-AA-3947-01	F2607Lfs*22	Q648H	WT	R481H	R3156H	WT	WT	WT	WT	WT	WT	F2840L	WT	WT	WT	WT	G2934Vfs*3	WT	S603N	A27T	K1247Rfs*21	K2781N	G3954*	Q1307K	Q771R	R2251H	WT	P4053H	WT	WT	WT	WT	WT	WT	G1394R	Q1013*	WT	E1595Sfs*11	WT	WT	WT	WT	WT	R1112W	WT	WT	N1207Tfs*16	WT
coadread_tcga	TCGA-AA-3949-01	WT	WT	WT	WT	WT	WT	D847N	WT	A2565T	WT	WT	WT	WT	M3993T	WT	WT	WT	WT	WT	WT	WT	WT	W3295R	WT	A319T	WT	WT	WT	WT	WT	WT	A1115T	WT	WT	T2540A	WT	WT	A520T	WT	WT	WT	WT	A955D	WT	WT	WT	WT	WT
coadread_tcga	TCGA-AA-3950-01	NS	NS	NS	NS	NS	NS	NS	NS	NS	NS	NS	NS	NS	NS	NS	NS	NS	NS	NS	NS	NS	NS	NS	NS	NS	NS	NS	NS	NS	NS	NS	NS	NS	NS	NS	NS	NS	NS	NS	NS	NS	NS	NS	NS	NS	NS	NS	NS
coadread_tcga	TCGA-AA-3952-01	WT	WT	WT	WT	WT	WT	WT	WT	WT	WT	WT	WT	WT	WT	WT	WT	WT	WT	WT	WT	WT	WT	WT	WT	WT	WT	WT	WT	WT	WT	WT	WT	WT	WT	WT	WT	WT	WT	WT	WT	WT	WT	WT	WT	WT	WT	WT	WT
coadread_tcga	TCGA-AA-3955-01	WT	WT	WT	WT	WT	WT	WT	WT	WT	WT	WT	WT	WT	WT	WT	WT	WT	WT	WT	WT	WT	WT	WT	WT	WT	WT	WT	WT	WT	WT	WT	WT	WT	WT	WT	WT	WT	WT	WT	WT	WT	WT	WT	WT	WT	WT	WT	WT
coadread_tcga	TCGA-AA-3956-01	R4023C	R552*	WT	WT	WT	WT	WT	I1808R	WT	WT	WT	WT	E1765Q	WT	WT	WT	WT	WT	WT	WT	WT	WT	WT	WT	WT	WT	WT	WT	WT	WT	WT	WT	WT	WT	WT	WT	WT	WT	WT	WT	WT	WT	WT	WT	D353N	WT	WT	WT
coadread_tcga	TCGA-AA-3968-01	NS	NS	NS	NS	NS	NS	NS	NS	NS	NS	NS	NS	NS	NS	NS	NS	NS	NS	NS	NS	NS	NS	NS	NS	NS	NS	NS	NS	NS	NS	NS	NS	NS	NS	NS	NS	NS	NS	NS	NS	NS	NS	NS	NS	NS	NS	NS	NS
coadread_tcga	TCGA-AA-3970-01	NS	NS	NS	NS	NS	NS	NS	NS	NS	NS	NS	NS	NS	NS	NS	NS	NS	NS	NS	NS	NS	NS	NS	NS	NS	NS	NS	NS	NS	NS	NS	NS	NS	NS	NS	NS	NS	NS	NS	NS	NS	NS	NS	NS	NS	NS	NS	NS
coadread_dfci_2016	coadread_dfci_2016_3476	WT	WT	WT	WT	WT	WT	WT	WT	WT	WT	WT	WT	WT	WT	WT	WT	WT	WT	WT	WT	WT	WT	WT	WT	WT	WT	V695I	WT	WT	WT	WT	WT	WT	WT	WT	WT	WT	WT	WT	WT	WT	WT	WT	WT	WT	WT	WT	WT
coadread_tcga	TCGA-AA-3972-01	WT	WT	WT	WT	WT	WT	WT	WT	WT	WT	WT	WT	WT	WT	WT	WT	S238N	WT	D813N	WT	WT	WT	WT	WT	WT	WT	WT	WT	WT	WT	WT	WT	V1045M	WT	WT	WT	WT	WT	WT	WT	WT	A1899T	WT	WT	WT	WT	WT	WT
coadread_tcga	TCGA-AA-3973-01	WT	WT	WT	WT	WT	WT	WT	WT	WT	WT	WT	WT	WT	WT	WT	WT	WT	WT	WT	WT	WT	WT	WT	WT	WT	WT	WT	WT	WT	WT	WT	WT	WT	WT	WT	WT	WT	WT	WT	WT	WT	WT	WT	WT	WT	WT	WT	WT
coadread_tcga	TCGA-AA-3975-01	T2650S	WT	WT	WT	WT	WT	WT	WT	WT	WT	WT	WT	WT	WT	WT	WT	WT	WT	WT	WT	WT	WT	WT	WT	WT	WT	WT	WT	WT	WT	WT	WT	WT	WT	WT	WT	WT	WT	WT	WT	WT	WT	WT	WT	WT	WT	WT	WT
coadread_tcga	TCGA-AA-3976-01	WT	WT	WT	WT	WT	WT	R594Q	WT	WT	WT	WT	WT	WT	WT	WT	WT	WT	WT	WT	WT	WT	WT	WT	V683I	WT	WT	WT	WT	WT	WT	WT	WT	WT	WT	WT	WT	WT	WT	WT	WT	WT	WT	WT	WT	WT	WT	WT	WT
coadread_tcga	TCGA-AA-3977-01	V2695I	R103Q	A2723del	WT	WT	E286* S2445L R2990C	I1556M V789G	F1430L	WT	D211Y	WT	P1158H	WT	V1590A E2143* V3635I R4826C	E431*	WT	E3136*	WT	WT	R116I	S1846Y	WT	WT	WT	V1941G S1687Y L364I	E2165* V633A D440N	A454V A408T E762*	E2699* E223*	F193L A725T	L165I	A455V	V652A D3062G	E1164K	WT	R293I C652* L1342M	N924H	F2079L R768C	E1624D D1995Y F2796C E2422D D2342G	WT	WT	WT	WT	A33D	F97L	G1001D	S1685*	WT	S2678L
coadread_tcga	TCGA-AA-3979-01	WT	WT	WT	WT	WT	WT	WT	WT	WT	WT	WT	WT	WT	WT	WT	WT	WT	WT	WT	WT	WT	WT	WT	WT	WT	WT	WT	R2576H	WT	WT	WT	WT	WT	WT	V475I	WT	WT	F2789L	WT	WT	WT	WT	A1268T	WT	WT	WT	WT	WT
coadread_tcga	TCGA-AA-3980-01	WT	WT	WT	WT	WT	WT	WT	S3666I	WT	WT	WT	WT	WT	WT	WT	WT	G4121*	WT	WT	WT	WT	WT	WT	WT	WT	WT	WT	WT	WT	WT	WT	WT	WT	WT	WT	WT	WT	WT	WT	WT	WT	WT	WT	WT	WT	WT	WT	WT
coadread_tcga	TCGA-AA-3982-01	WT	WT	WT	WT	WT	WT	K91N	WT	WT	WT	WT	WT	WT	WT	WT	WT	WT	WT	WT	WT	WT	WT	WT	WT	WT	WT	WT	WT	WT	WT	WT	WT	WT	WT	WT	WT	WT	WT	L543F	WT	WT	WT	WT	WT	WT	WT	WT	WT
coadread_tcga	TCGA-AA-3984-01	S1893F D1019N R1320C V3615A F4142C	WT	WT	WT	WT	R3346Q Y4194H	R245Q E1368K	WT	E3148K	H583N	WT	F1178L	F1154L	E1318* E2650G E2866* K4864Q	F668L	D123N	WT	WT	WT	K2435N S2193Y	V1670A E834* L306F	E3061K A1819V	WT	WT	S1378F	D2103N D1623Y A406T	G265D D329N	WT	WT	L894= K508E	WT	R1400*	R792Q	WT	WT	S750*	WT	WT	WT	A3100T	WT	WT	E1351D	S654P	WT	WT	A3034V R2750I F2005C	A2041T N4323H K2012T E735D
coadread_dfci_2016	coadread_dfci_2016_3677	WT	WT	WT	WT	WT	WT	WT	WT	WT	WT	WT	WT	WT	WT	WT	WT	WT	WT	WT	WT	WT	WT	WT	WT	WT	WT	WT	WT	WT	WT	WT	WT	WT	WT	WT	WT	WT	WT	WT	WT	WT	WT	WT	WT	WT	WT	WT	WT
coadread_tcga	TCGA-AA-3989-01	WT	WT	WT	WT	WT	R2596W	WT	WT	WT	WT	WT	WT	WT	WT	A2253D	WT	WT	WT	WT	WT	WT	A1427T	WT	D1250Y	WT	WT	WT	WT	WT	WT	WT	WT	WT	WT	WT	WT	WT	WT	WT	WT	WT	G352S	WT	WT	WT	WT	WT	WT
coadread_tcga	TCGA-4T-AA8H-01	NS	NS	NS	NS	NS	NS	NS	NS	NS	NS	NS	NS	NS	NS	NS	NS	NS	NS	NS	NS	NS	NS	NS	NS	NS	NS	NS	NS	NS	NS	NS	NS	NS	NS	NS	NS	NS	NS	NS	NS	NS	NS	NS	NS	NS	NS	NS	NS
coadread_tcga	TCGA-5M-AAT4-01	NS	NS	NS	NS	NS	NS	NS	NS	NS	NS	NS	NS	NS	NS	NS	NS	NS	NS	NS	NS	NS	NS	NS	NS	NS	NS	NS	NS	NS	NS	NS	NS	NS	NS	NS	NS	NS	NS	NS	NS	NS	NS	NS	NS	NS	NS	NS	NS
coadread_tcga	TCGA-5M-AAT5-01	NS	NS	NS	NS	NS	NS	NS	NS	NS	NS	NS	NS	NS	NS	NS	NS	NS	NS	NS	NS	NS	NS	NS	NS	NS	NS	NS	NS	NS	NS	NS	NS	NS	NS	NS	NS	NS	NS	NS	NS	NS	NS	NS	NS	NS	NS	NS	NS
coadread_tcga	TCGA-5M-AAT6-01	NS	NS	NS	NS	NS	NS	NS	NS	NS	NS	NS	NS	NS	NS	NS	NS	NS	NS	NS	NS	NS	NS	NS	NS	NS	NS	NS	NS	NS	NS	NS	NS	NS	NS	NS	NS	NS	NS	NS	NS	NS	NS	NS	NS	NS	NS	NS	NS
coadread_tcga	TCGA-5M-AATA-01	NS	NS	NS	NS	NS	NS	NS	NS	NS	NS	NS	NS	NS	NS	NS	NS	NS	NS	NS	NS	NS	NS	NS	NS	NS	NS	NS	NS	NS	NS	NS	NS	NS	NS	NS	NS	NS	NS	NS	NS	NS	NS	NS	NS	NS	NS	NS	NS
coadread_tcga	TCGA-5M-AATE-01	NS	NS	NS	NS	NS	NS	NS	NS	NS	NS	NS	NS	NS	NS	NS	NS	NS	NS	NS	NS	NS	NS	NS	NS	NS	NS	NS	NS	NS	NS	NS	NS	NS	NS	NS	NS	NS	NS	NS	NS	NS	NS	NS	NS	NS	NS	NS	NS
coadread_tcga	TCGA-AY-A8YK-01	NS	NS	NS	NS	NS	NS	NS	NS	NS	NS	NS	NS	NS	NS	NS	NS	NS	NS	NS	NS	NS	NS	NS	NS	NS	NS	NS	NS	NS	NS	NS	NS	NS	NS	NS	NS	NS	NS	NS	NS	NS	NS	NS	NS	NS	NS	NS	NS
coadread_tcga	TCGA-NH-A6GC-01	NS	NS	NS	NS	NS	NS	NS	NS	NS	NS	NS	NS	NS	NS	NS	NS	NS	NS	NS	NS	NS	NS	NS	NS	NS	NS	NS	NS	NS	NS	NS	NS	NS	NS	NS	NS	NS	NS	NS	NS	NS	NS	NS	NS	NS	NS	NS	NS
coadread_tcga	TCGA-NH-A8F7-01	NS	NS	NS	NS	NS	NS	NS	NS	NS	NS	NS	NS	NS	NS	NS	NS	NS	NS	NS	NS	NS	NS	NS	NS	NS	NS	NS	NS	NS	NS	NS	NS	NS	NS	NS	NS	NS	NS	NS	NS	NS	NS	NS	NS	NS	NS	NS	NS
coadread_tcga	TCGA-NH-A8F8-01	NS	NS	NS	NS	NS	NS	NS	NS	NS	NS	NS	NS	NS	NS	NS	NS	NS	NS	NS	NS	NS	NS	NS	NS	NS	NS	NS	NS	NS	NS	NS	NS	NS	NS	NS	NS	NS	NS	NS	NS	NS	NS	NS	NS	NS	NS	NS	NS
coadread_tcga	TCGA-QL-A97D-01	NS	NS	NS	NS	NS	NS	NS	NS	NS	NS	NS	NS	NS	NS	NS	NS	NS	NS	NS	NS	NS	NS	NS	NS	NS	NS	NS	NS	NS	NS	NS	NS	NS	NS	NS	NS	NS	NS	NS	NS	NS	NS	NS	NS	NS	NS	NS	NS
coadread_tcga	TCGA-WS-AB45-01	NS	NS	NS	NS	NS	NS	NS	NS	NS	NS	NS	NS	NS	NS	NS	NS	NS	NS	NS	NS	NS	NS	NS	NS	NS	NS	NS	NS	NS	NS	NS	NS	NS	NS	NS	NS	NS	NS	NS	NS	NS	NS	NS	NS	NS	NS	NS	NS
coadread_dfci_2016	coadread_dfci_2016_2262	WT	WT	WT	WT	WT	WT	WT	WT	WT	WT	WT	WT	WT	WT	WT	WT	WT	WT	WT	WT	WT	WT	WT	WT	WT	WT	WT	WT	WT	WT	WT	WT	WT	WT	WT	WT	WT	WT	WT	WT	WT	WT	WT	WT	WT	WT	WT	WT
coadread_tcga	TCGA-AA-3967-01	NS	NS	NS	NS	NS	NS	NS	NS	NS	NS	NS	NS	NS	NS	NS	NS	NS	NS	NS	NS	NS	NS	NS	NS	NS	NS	NS	NS	NS	NS	NS	NS	NS	NS	NS	NS	NS	NS	NS	NS	NS	NS	NS	NS	NS	NS	NS	NS
coadread_tcga	TCGA-AA-3994-01	WT	WT	WT	WT	WT	WT	WT	WT	WT	WT	WT	WT	WT	WT	WT	WT	WT	WT	WT	WT	WT	WT	WT	WT	WT	G108V	WT	WT	Q167H	WT	WT	WT	WT	WT	WT	WT	WT	WT	WT	WT	WT	WT	WT	Q1033K	WT	WT	WT	WT
coadread_tcga	TCGA-AY-4070-01	WT	WT	WT	WT	WT	WT	WT	WT	WT	WT	WT	WT	WT	WT	WT	WT	WT	WT	WT	WT	WT	WT	WT	WT	WT	WT	WT	WT	WT	WT	WT	WT	WT	WT	WT	WT	WT	WT	WT	WT	WT	WT	WT	WT	WT	G1011V	WT	WT
coadread_tcga	TCGA-AY-4071-01	WT	WT	WT	WT	WT	WT	WT	I3373V	WT	WT	WT	F2253C	WT	WT	WT	WT	WT	WT	WT	V471I	WT	WT	WT	WT	WT	WT	WT	WT	WT	WT	WT	WT	WT	WT	WT	WT	WT	WT	S346P	WT	WT	WT	WT	WT	WT	WT	WT	WT
coadread_tcga	TCGA-AG-3574-01	WT	WT	WT	WT	WT	WT	WT	WT	WT	WT	WT	WT	WT	WT	WT	WT	WT	WT	WT	WT	WT	WT	WT	WT	WT	WT	WT	WT	WT	WT	WT	WT	WT	WT	WT	WT	WT	WT	WT	WT	WT	WT	WT	WT	WT	WT	WT	WT
coadread_tcga	TCGA-AA-A01R-01	T3224S	T541M	P1235H	Q685*	R801H	WT	WT	V1092A V2746I	WT	WT	WT	WT	WT	WT	D1756E	WT	R3773H R227C	WT	R1012C	WT	WT	A2177V V61I	WT	WT	WT	WT	WT	E3912D T3337M	WT	WT	WT	WT	WT	WT	T2078M	E1591A	WT	Q1778H	WT	WT	WT	Y1302C	WT	H1261Y	WT	E2402K R958C	WT	WT
coadread_tcga	TCGA-AA-A01S-01	WT	WT	WT	WT	WT	WT	WT	WT	WT	WT	WT	WT	WT	WT	WT	WT	WT	WT	WT	WT	WT	WT	WT	WT	WT	WT	WT	WT	WT	WT	WT	WT	WT	WT	WT	WT	WT	WT	WT	WT	WT	WT	WT	WT	WT	WT	WT	WT
coadread_tcga	TCGA-AA-A01T-01	WT	WT	WT	WT	WT	WT	WT	WT	WT	WT	WT	K3042N	WT	WT	WT	WT	WT	WT	WT	WT	WT	WT	WT	WT	WT	WT	WT	WT	WT	WT	WT	WT	WT	WT	WT	WT	WT	WT	WT	WT	WT	WT	WT	WT	WT	WT	WT	WT
coadread_tcga	TCGA-AA-A01V-01	WT	WT	WT	WT	WT	WT	WT	WT	WT	WT	WT	WT	WT	WT	WT	WT	WT	WT	WT	I2832Sfs*65	WT	WT	WT	WT	WT	WT	N1321Kfs*10	WT	WT	WT	WT	WT	WT	WT	WT	WT	WT	WT	WT	WT	WT	WT	WT	I417L	WT	WT	WT	WT
coadread_tcga	TCGA-AG-3582-01	WT	WT	WT	WT	WT	WT	WT	WT	WT	WT	WT	WT	WT	WT	WT	WT	WT	WT	R110Q	WT	WT	WT	WT	WT	WT	WT	WT	WT	WT	WT	WT	WT	WT	WT	WT	WT	WT	WT	WT	WT	WT	WT	WT	WT	WT	WT	WT	WT
coadread_tcga	TCGA-AA-A01Z-01	WT	WT	WT	WT	WT	WT	WT	WT	WT	R855*	WT	WT	WT	WT	WT	WT	WT	WT	WT	WT	WT	WT	WT	WT	WT	WT	WT	WT	WT	WT	WT	WT	WT	WT	WT	WT	WT	WT	WT	WT	WT	WT	WT	WT	WT	WT	WT	WT
coadread_dfci_2016	coadread_dfci_2016_1854	WT	WT	WT	WT	WT	WT	WT	WT	WT	WT	WT	WT	WT	WT	WT	WT	WT	WT	WT	WT	WT	WT	WT	WT	WT	WT	M1293V	WT	WT	WT	WT	WT	WT	WT	WT	WT	WT	WT	WT	WT	WT	WT	WT	WT	WT	WT	WT	WT
coadread_tcga	TCGA-AA-A02K-01	NS	NS	NS	NS	NS	NS	NS	NS	NS	NS	NS	NS	NS	NS	NS	NS	NS	NS	NS	NS	NS	NS	NS	NS	NS	NS	NS	NS	NS	NS	NS	NS	NS	NS	NS	NS	NS	NS	NS	NS	NS	NS	NS	NS	NS	NS	NS	NS
coadread_tcga	TCGA-AA-A02O-01	WT	WT	WT	WT	WT	WT	WT	WT	WT	WT	WT	R406C	WT	WT	WT	WT	WT	WT	WT	WT	WT	WT	WT	WT	WT	R1993Q V1634I	WT	WT	WT	L1555I	WT	WT	WT	WT	V1078F	WT	WT	WT	WT	WT	WT	WT	WT	WT	WT	WT	WT	WT
coadread_tcga	TCGA-AA-A00Q-01	WT	WT	WT	WT	WT	WT	WT	WT	WT	WT	WT	WT	WT	WT	WT	WT	WT	WT	WT	WT	E3277=	WT	WT	WT	WT	WT	WT	R3077C	WT	WT	WT	WT	WT	WT	WT	WT	WT	WT	WT	WT	WT	WT	WT	WT	WT	WT	WT	WT
coadread_tcga	TCGA-AA-A03F-01	WT	WT	WT	WT	WT	WT	WT	WT	WT	WT	WT	WT	WT	WT	WT	WT	WT	WT	WT	R1164C	WT	WT	WT	WT	WT	R2314P	WT	WT	WT	WT	WT	WT	WT	WT	WT	WT	WT	H2151N	WT	WT	WT	WT	WT	WT	WT	WT	WT	WT
coadread_tcga	TCGA-AA-A03J-01	WT	WT	WT	WT	WT	WT	WT	WT	WT	WT	WT	WT	WT	WT	WT	WT	WT	WT	WT	WT	WT	WT	WT	WT	WT	WT	WT	WT	WT	WT	WT	WT	WT	WT	WT	WT	WT	WT	WT	WT	WT	WT	WT	WT	WT	WT	WT	WT
coadread_tcga	TCGA-A6-2671-01	NS	NS	NS	NS	NS	NS	NS	NS	NS	NS	NS	NS	NS	NS	NS	NS	NS	NS	NS	NS	NS	NS	NS	NS	NS	NS	NS	NS	NS	NS	NS	NS	NS	NS	NS	NS	NS	NS	NS	NS	NS	NS	NS	NS	NS	NS	NS	NS
coadread_tcga	TCGA-A6-2679-01	NS	NS	NS	NS	NS	NS	NS	NS	NS	NS	NS	NS	NS	NS	NS	NS	NS	NS	NS	NS	NS	NS	NS	NS	NS	NS	NS	NS	NS	NS	NS	NS	NS	NS	NS	NS	NS	NS	NS	NS	NS	NS	NS	NS	NS	NS	NS	NS
coadread_tcga	TCGA-A6-2680-01	NS	NS	NS	NS	NS	NS	NS	NS	NS	NS	NS	NS	NS	NS	NS	NS	NS	NS	NS	NS	NS	NS	NS	NS	NS	NS	NS	NS	NS	NS	NS	NS	NS	NS	NS	NS	NS	NS	NS	NS	NS	NS	NS	NS	NS	NS	NS	NS
coadread_tcga	TCGA-A6-2681-01	NS	NS	NS	NS	NS	NS	NS	NS	NS	NS	NS	NS	NS	NS	NS	NS	NS	NS	NS	NS	NS	NS	NS	NS	NS	NS	NS	NS	NS	NS	NS	NS	NS	NS	NS	NS	NS	NS	NS	NS	NS	NS	NS	NS	NS	NS	NS	NS
coadread_tcga	TCGA-A6-2682-01	NS	NS	NS	NS	NS	NS	NS	NS	NS	NS	NS	NS	NS	NS	NS	NS	NS	NS	NS	NS	NS	NS	NS	NS	NS	NS	NS	NS	NS	NS	NS	NS	NS	NS	NS	NS	NS	NS	NS	NS	NS	NS	NS	NS	NS	NS	NS	NS
coadread_tcga	TCGA-A6-2684-01	NS	NS	NS	NS	NS	NS	NS	NS	NS	NS	NS	NS	NS	NS	NS	NS	NS	NS	NS	NS	NS	NS	NS	NS	NS	NS	NS	NS	NS	NS	NS	NS	NS	NS	NS	NS	NS	NS	NS	NS	NS	NS	NS	NS	NS	NS	NS	NS
coadread_tcga	TCGA-A6-2685-01	NS	NS	NS	NS	NS	NS	NS	NS	NS	NS	NS	NS	NS	NS	NS	NS	NS	NS	NS	NS	NS	NS	NS	NS	NS	NS	NS	NS	NS	NS	NS	NS	NS	NS	NS	NS	NS	NS	NS	NS	NS	NS	NS	NS	NS	NS	NS	NS
coadread_tcga	TCGA-A6-2686-01	NS	NS	NS	NS	NS	NS	NS	NS	NS	NS	NS	NS	NS	NS	NS	NS	NS	NS	NS	NS	NS	NS	NS	NS	NS	NS	NS	NS	NS	NS	NS	NS	NS	NS	NS	NS	NS	NS	NS	NS	NS	NS	NS	NS	NS	NS	NS	NS
coadread_tcga	TCGA-A6-4107-01	NS	NS	NS	NS	NS	NS	NS	NS	NS	NS	NS	NS	NS	NS	NS	NS	NS	NS	NS	NS	NS	NS	NS	NS	NS	NS	NS	NS	NS	NS	NS	NS	NS	NS	NS	NS	NS	NS	NS	NS	NS	NS	NS	NS	NS	NS	NS	NS
coadread_tcga	TCGA-AA-3488-01	NS	NS	NS	NS	NS	NS	NS	NS	NS	NS	NS	NS	NS	NS	NS	NS	NS	NS	NS	NS	NS	NS	NS	NS	NS	NS	NS	NS	NS	NS	NS	NS	NS	NS	NS	NS	NS	NS	NS	NS	NS	NS	NS	NS	NS	NS	NS	NS
coadread_tcga	TCGA-AA-3492-01	NS	NS	NS	NS	NS	NS	NS	NS	NS	NS	NS	NS	NS	NS	NS	NS	NS	NS	NS	NS	NS	NS	NS	NS	NS	NS	NS	NS	NS	NS	NS	NS	NS	NS	NS	NS	NS	NS	NS	NS	NS	NS	NS	NS	NS	NS	NS	NS
coadread_tcga	TCGA-AA-3494-01	NS	NS	NS	NS	NS	NS	NS	NS	NS	NS	NS	NS	NS	NS	NS	NS	NS	NS	NS	NS	NS	NS	NS	NS	NS	NS	NS	NS	NS	NS	NS	NS	NS	NS	NS	NS	NS	NS	NS	NS	NS	NS	NS	NS	NS	NS	NS	NS
coadread_tcga	TCGA-AA-3495-01	NS	NS	NS	NS	NS	NS	NS	NS	NS	NS	NS	NS	NS	NS	NS	NS	NS	NS	NS	NS	NS	NS	NS	NS	NS	NS	NS	NS	NS	NS	NS	NS	NS	NS	NS	NS	NS	NS	NS	NS	NS	NS	NS	NS	NS	NS	NS	NS
coadread_tcga	TCGA-AA-3502-01	NS	NS	NS	NS	NS	NS	NS	NS	NS	NS	NS	NS	NS	NS	NS	NS	NS	NS	NS	NS	NS	NS	NS	NS	NS	NS	NS	NS	NS	NS	NS	NS	NS	NS	NS	NS	NS	NS	NS	NS	NS	NS	NS	NS	NS	NS	NS	NS
coadread_tcga	TCGA-AA-3506-01	NS	NS	NS	NS	NS	NS	NS	NS	NS	NS	NS	NS	NS	NS	NS	NS	NS	NS	NS	NS	NS	NS	NS	NS	NS	NS	NS	NS	NS	NS	NS	NS	NS	NS	NS	NS	NS	NS	NS	NS	NS	NS	NS	NS	NS	NS	NS	NS
coadread_tcga	TCGA-AA-3509-01	NS	NS	NS	NS	NS	NS	NS	NS	NS	NS	NS	NS	NS	NS	NS	NS	NS	NS	NS	NS	NS	NS	NS	NS	NS	NS	NS	NS	NS	NS	NS	NS	NS	NS	NS	NS	NS	NS	NS	NS	NS	NS	NS	NS	NS	NS	NS	NS
coadread_tcga	TCGA-AA-3510-01	NS	NS	NS	NS	NS	NS	NS	NS	NS	NS	NS	NS	NS	NS	NS	NS	NS	NS	NS	NS	NS	NS	NS	NS	NS	NS	NS	NS	NS	NS	NS	NS	NS	NS	NS	NS	NS	NS	NS	NS	NS	NS	NS	NS	NS	NS	NS	NS
coadread_tcga	TCGA-AZ-4308-01	NS	NS	NS	NS	NS	NS	NS	NS	NS	NS	NS	NS	NS	NS	NS	NS	NS	NS	NS	NS	NS	NS	NS	NS	NS	NS	NS	NS	NS	NS	NS	NS	NS	NS	NS	NS	NS	NS	NS	NS	NS	NS	NS	NS	NS	NS	NS	NS
coadread_tcga	TCGA-AZ-4313-01	NS	NS	NS	NS	NS	NS	NS	NS	NS	NS	NS	NS	NS	NS	NS	NS	NS	NS	NS	NS	NS	NS	NS	NS	NS	NS	NS	NS	NS	NS	NS	NS	NS	NS	NS	NS	NS	NS	NS	NS	NS	NS	NS	NS	NS	NS	NS	NS
coadread_tcga	TCGA-AZ-4315-01	NS	NS	NS	NS	NS	NS	NS	NS	NS	NS	NS	NS	NS	NS	NS	NS	NS	NS	NS	NS	NS	NS	NS	NS	NS	NS	NS	NS	NS	NS	NS	NS	NS	NS	NS	NS	NS	NS	NS	NS	NS	NS	NS	NS	NS	NS	NS	NS
coadread_tcga	TCGA-AZ-4614-01	NS	NS	NS	NS	NS	NS	NS	NS	NS	NS	NS	NS	NS	NS	NS	NS	NS	NS	NS	NS	NS	NS	NS	NS	NS	NS	NS	NS	NS	NS	NS	NS	NS	NS	NS	NS	NS	NS	NS	NS	NS	NS	NS	NS	NS	NS	NS	NS
coadread_tcga	TCGA-AZ-4615-01	NS	NS	NS	NS	NS	NS	NS	NS	NS	NS	NS	NS	NS	NS	NS	NS	NS	NS	NS	NS	NS	NS	NS	NS	NS	NS	NS	NS	NS	NS	NS	NS	NS	NS	NS	NS	NS	NS	NS	NS	NS	NS	NS	NS	NS	NS	NS	NS
coadread_tcga	TCGA-AZ-4681-01	NS	NS	NS	NS	NS	NS	NS	NS	NS	NS	NS	NS	NS	NS	NS	NS	NS	NS	NS	NS	NS	NS	NS	NS	NS	NS	NS	NS	NS	NS	NS	NS	NS	NS	NS	NS	NS	NS	NS	NS	NS	NS	NS	NS	NS	NS	NS	NS
coadread_tcga	TCGA-AZ-4682-01	NS	NS	NS	NS	NS	NS	NS	NS	NS	NS	NS	NS	NS	NS	NS	NS	NS	NS	NS	NS	NS	NS	NS	NS	NS	NS	NS	NS	NS	NS	NS	NS	NS	NS	NS	NS	NS	NS	NS	NS	NS	NS	NS	NS	NS	NS	NS	NS
coadread_tcga	TCGA-AZ-4684-01	NS	NS	NS	NS	NS	NS	NS	NS	NS	NS	NS	NS	NS	NS	NS	NS	NS	NS	NS	NS	NS	NS	NS	NS	NS	NS	NS	NS	NS	NS	NS	NS	NS	NS	NS	NS	NS	NS	NS	NS	NS	NS	NS	NS	NS	NS	NS	NS
coadread_tcga	TCGA-CA-5256-01	NS	NS	NS	NS	NS	NS	NS	NS	NS	NS	NS	NS	NS	NS	NS	NS	NS	NS	NS	NS	NS	NS	NS	NS	NS	NS	NS	NS	NS	NS	NS	NS	NS	NS	NS	NS	NS	NS	NS	NS	NS	NS	NS	NS	NS	NS	NS	NS
coadread_tcga	TCGA-CK-4951-01	NS	NS	NS	NS	NS	NS	NS	NS	NS	NS	NS	NS	NS	NS	NS	NS	NS	NS	NS	NS	NS	NS	NS	NS	NS	NS	NS	NS	NS	NS	NS	NS	NS	NS	NS	NS	NS	NS	NS	NS	NS	NS	NS	NS	NS	NS	NS	NS
coadread_tcga	TCGA-CM-4744-01	NS	NS	NS	NS	NS	NS	NS	NS	NS	NS	NS	NS	NS	NS	NS	NS	NS	NS	NS	NS	NS	NS	NS	NS	NS	NS	NS	NS	NS	NS	NS	NS	NS	NS	NS	NS	NS	NS	NS	NS	NS	NS	NS	NS	NS	NS	NS	NS
coadread_tcga	TCGA-CM-4746-01	NS	NS	NS	NS	NS	NS	NS	NS	NS	NS	NS	NS	NS	NS	NS	NS	NS	NS	NS	NS	NS	NS	NS	NS	NS	NS	NS	NS	NS	NS	NS	NS	NS	NS	NS	NS	NS	NS	NS	NS	NS	NS	NS	NS	NS	NS	NS	NS
coadread_tcga	TCGA-CM-4747-01	NS	NS	NS	NS	NS	NS	NS	NS	NS	NS	NS	NS	NS	NS	NS	NS	NS	NS	NS	NS	NS	NS	NS	NS	NS	NS	NS	NS	NS	NS	NS	NS	NS	NS	NS	NS	NS	NS	NS	NS	NS	NS	NS	NS	NS	NS	NS	NS
coadread_tcga	TCGA-CM-4748-01	NS	NS	NS	NS	NS	NS	NS	NS	NS	NS	NS	NS	NS	NS	NS	NS	NS	NS	NS	NS	NS	NS	NS	NS	NS	NS	NS	NS	NS	NS	NS	NS	NS	NS	NS	NS	NS	NS	NS	NS	NS	NS	NS	NS	NS	NS	NS	NS
coadread_tcga	TCGA-CM-4750-01	NS	NS	NS	NS	NS	NS	NS	NS	NS	NS	NS	NS	NS	NS	NS	NS	NS	NS	NS	NS	NS	NS	NS	NS	NS	NS	NS	NS	NS	NS	NS	NS	NS	NS	NS	NS	NS	NS	NS	NS	NS	NS	NS	NS	NS	NS	NS	NS
coadread_tcga	TCGA-CM-4752-01	NS	NS	NS	NS	NS	NS	NS	NS	NS	NS	NS	NS	NS	NS	NS	NS	NS	NS	NS	NS	NS	NS	NS	NS	NS	NS	NS	NS	NS	NS	NS	NS	NS	NS	NS	NS	NS	NS	NS	NS	NS	NS	NS	NS	NS	NS	NS	NS
coadread_tcga	TCGA-CM-5341-01	NS	NS	NS	NS	NS	NS	NS	NS	NS	NS	NS	NS	NS	NS	NS	NS	NS	NS	NS	NS	NS	NS	NS	NS	NS	NS	NS	NS	NS	NS	NS	NS	NS	NS	NS	NS	NS	NS	NS	NS	NS	NS	NS	NS	NS	NS	NS	NS
coadread_tcga	TCGA-A6-5657-01	NS	NS	NS	NS	NS	NS	NS	NS	NS	NS	NS	NS	NS	NS	NS	NS	NS	NS	NS	NS	NS	NS	NS	NS	NS	NS	NS	NS	NS	NS	NS	NS	NS	NS	NS	NS	NS	NS	NS	NS	NS	NS	NS	NS	NS	NS	NS	NS
coadread_tcga	TCGA-A6-5659-01	NS	NS	NS	NS	NS	NS	NS	NS	NS	NS	NS	NS	NS	NS	NS	NS	NS	NS	NS	NS	NS	NS	NS	NS	NS	NS	NS	NS	NS	NS	NS	NS	NS	NS	NS	NS	NS	NS	NS	NS	NS	NS	NS	NS	NS	NS	NS	NS
coadread_tcga	TCGA-A6-5660-01	NS	NS	NS	NS	NS	NS	NS	NS	NS	NS	NS	NS	NS	NS	NS	NS	NS	NS	NS	NS	NS	NS	NS	NS	NS	NS	NS	NS	NS	NS	NS	NS	NS	NS	NS	NS	NS	NS	NS	NS	NS	NS	NS	NS	NS	NS	NS	NS
coadread_tcga	TCGA-A6-5661-01	NS	NS	NS	NS	NS	NS	NS	NS	NS	NS	NS	NS	NS	NS	NS	NS	NS	NS	NS	NS	NS	NS	NS	NS	NS	NS	NS	NS	NS	NS	NS	NS	NS	NS	NS	NS	NS	NS	NS	NS	NS	NS	NS	NS	NS	NS	NS	NS
coadread_tcga	TCGA-A6-5662-01	NS	NS	NS	NS	NS	NS	NS	NS	NS	NS	NS	NS	NS	NS	NS	NS	NS	NS	NS	NS	NS	NS	NS	NS	NS	NS	NS	NS	NS	NS	NS	NS	NS	NS	NS	NS	NS	NS	NS	NS	NS	NS	NS	NS	NS	NS	NS	NS
coadread_tcga	TCGA-A6-5665-01	NS	NS	NS	NS	NS	NS	NS	NS	NS	NS	NS	NS	NS	NS	NS	NS	NS	NS	NS	NS	NS	NS	NS	NS	NS	NS	NS	NS	NS	NS	NS	NS	NS	NS	NS	NS	NS	NS	NS	NS	NS	NS	NS	NS	NS	NS	NS	NS
coadread_tcga	TCGA-A6-5666-01	NS	NS	NS	NS	NS	NS	NS	NS	NS	NS	NS	NS	NS	NS	NS	NS	NS	NS	NS	NS	NS	NS	NS	NS	NS	NS	NS	NS	NS	NS	NS	NS	NS	NS	NS	NS	NS	NS	NS	NS	NS	NS	NS	NS	NS	NS	NS	NS
coadread_tcga	TCGA-AD-5900-01	NS	NS	NS	NS	NS	NS	NS	NS	NS	NS	NS	NS	NS	NS	NS	NS	NS	NS	NS	NS	NS	NS	NS	NS	NS	NS	NS	NS	NS	NS	NS	NS	NS	NS	NS	NS	NS	NS	NS	NS	NS	NS	NS	NS	NS	NS	NS	NS
coadread_tcga	TCGA-AM-5820-01	NS	NS	NS	NS	NS	NS	NS	NS	NS	NS	NS	NS	NS	NS	NS	NS	NS	NS	NS	NS	NS	NS	NS	NS	NS	NS	NS	NS	NS	NS	NS	NS	NS	NS	NS	NS	NS	NS	NS	NS	NS	NS	NS	NS	NS	NS	NS	NS
coadread_tcga	TCGA-AM-5821-01	NS	NS	NS	NS	NS	NS	NS	NS	NS	NS	NS	NS	NS	NS	NS	NS	NS	NS	NS	NS	NS	NS	NS	NS	NS	NS	NS	NS	NS	NS	NS	NS	NS	NS	NS	NS	NS	NS	NS	NS	NS	NS	NS	NS	NS	NS	NS	NS
coadread_tcga	TCGA-AY-5543-01	NS	NS	NS	NS	NS	NS	NS	NS	NS	NS	NS	NS	NS	NS	NS	NS	NS	NS	NS	NS	NS	NS	NS	NS	NS	NS	NS	NS	NS	NS	NS	NS	NS	NS	NS	NS	NS	NS	NS	NS	NS	NS	NS	NS	NS	NS	NS	NS
coadread_tcga	TCGA-AZ-5403-01	NS	NS	NS	NS	NS	NS	NS	NS	NS	NS	NS	NS	NS	NS	NS	NS	NS	NS	NS	NS	NS	NS	NS	NS	NS	NS	NS	NS	NS	NS	NS	NS	NS	NS	NS	NS	NS	NS	NS	NS	NS	NS	NS	NS	NS	NS	NS	NS
coadread_tcga	TCGA-CA-5796-01	NS	NS	NS	NS	NS	NS	NS	NS	NS	NS	NS	NS	NS	NS	NS	NS	NS	NS	NS	NS	NS	NS	NS	NS	NS	NS	NS	NS	NS	NS	NS	NS	NS	NS	NS	NS	NS	NS	NS	NS	NS	NS	NS	NS	NS	NS	NS	NS
coadread_tcga	TCGA-CA-5797-01	NS	NS	NS	NS	NS	NS	NS	NS	NS	NS	NS	NS	NS	NS	NS	NS	NS	NS	NS	NS	NS	NS	NS	NS	NS	NS	NS	NS	NS	NS	NS	NS	NS	NS	NS	NS	NS	NS	NS	NS	NS	NS	NS	NS	NS	NS	NS	NS
coadread_tcga	TCGA-CK-4947-01	NS	NS	NS	NS	NS	NS	NS	NS	NS	NS	NS	NS	NS	NS	NS	NS	NS	NS	NS	NS	NS	NS	NS	NS	NS	NS	NS	NS	NS	NS	NS	NS	NS	NS	NS	NS	NS	NS	NS	NS	NS	NS	NS	NS	NS	NS	NS	NS
coadread_tcga	TCGA-CK-4948-01	NS	NS	NS	NS	NS	NS	NS	NS	NS	NS	NS	NS	NS	NS	NS	NS	NS	NS	NS	NS	NS	NS	NS	NS	NS	NS	NS	NS	NS	NS	NS	NS	NS	NS	NS	NS	NS	NS	NS	NS	NS	NS	NS	NS	NS	NS	NS	NS
coadread_tcga	TCGA-CK-5912-01	NS	NS	NS	NS	NS	NS	NS	NS	NS	NS	NS	NS	NS	NS	NS	NS	NS	NS	NS	NS	NS	NS	NS	NS	NS	NS	NS	NS	NS	NS	NS	NS	NS	NS	NS	NS	NS	NS	NS	NS	NS	NS	NS	NS	NS	NS	NS	NS
coadread_tcga	TCGA-CK-5913-01	NS	NS	NS	NS	NS	NS	NS	NS	NS	NS	NS	NS	NS	NS	NS	NS	NS	NS	NS	NS	NS	NS	NS	NS	NS	NS	NS	NS	NS	NS	NS	NS	NS	NS	NS	NS	NS	NS	NS	NS	NS	NS	NS	NS	NS	NS	NS	NS
coadread_tcga	TCGA-CK-5914-01	NS	NS	NS	NS	NS	NS	NS	NS	NS	NS	NS	NS	NS	NS	NS	NS	NS	NS	NS	NS	NS	NS	NS	NS	NS	NS	NS	NS	NS	NS	NS	NS	NS	NS	NS	NS	NS	NS	NS	NS	NS	NS	NS	NS	NS	NS	NS	NS
coadread_tcga	TCGA-CK-5915-01	NS	NS	NS	NS	NS	NS	NS	NS	NS	NS	NS	NS	NS	NS	NS	NS	NS	NS	NS	NS	NS	NS	NS	NS	NS	NS	NS	NS	NS	NS	NS	NS	NS	NS	NS	NS	NS	NS	NS	NS	NS	NS	NS	NS	NS	NS	NS	NS
coadread_tcga	TCGA-CK-5916-01	NS	NS	NS	NS	NS	NS	NS	NS	NS	NS	NS	NS	NS	NS	NS	NS	NS	NS	NS	NS	NS	NS	NS	NS	NS	NS	NS	NS	NS	NS	NS	NS	NS	NS	NS	NS	NS	NS	NS	NS	NS	NS	NS	NS	NS	NS	NS	NS
coadread_tcga	TCGA-CM-5860-01	NS	NS	NS	NS	NS	NS	NS	NS	NS	NS	NS	NS	NS	NS	NS	NS	NS	NS	NS	NS	NS	NS	NS	NS	NS	NS	NS	NS	NS	NS	NS	NS	NS	NS	NS	NS	NS	NS	NS	NS	NS	NS	NS	NS	NS	NS	NS	NS
coadread_tcga	TCGA-CM-5861-01	NS	NS	NS	NS	NS	NS	NS	NS	NS	NS	NS	NS	NS	NS	NS	NS	NS	NS	NS	NS	NS	NS	NS	NS	NS	NS	NS	NS	NS	NS	NS	NS	NS	NS	NS	NS	NS	NS	NS	NS	NS	NS	NS	NS	NS	NS	NS	NS
coadread_tcga	TCGA-CM-5862-01	NS	NS	NS	NS	NS	NS	NS	NS	NS	NS	NS	NS	NS	NS	NS	NS	NS	NS	NS	NS	NS	NS	NS	NS	NS	NS	NS	NS	NS	NS	NS	NS	NS	NS	NS	NS	NS	NS	NS	NS	NS	NS	NS	NS	NS	NS	NS	NS
coadread_tcga	TCGA-CM-5864-01	NS	NS	NS	NS	NS	NS	NS	NS	NS	NS	NS	NS	NS	NS	NS	NS	NS	NS	NS	NS	NS	NS	NS	NS	NS	NS	NS	NS	NS	NS	NS	NS	NS	NS	NS	NS	NS	NS	NS	NS	NS	NS	NS	NS	NS	NS	NS	NS
coadread_tcga	TCGA-CM-5868-01	NS	NS	NS	NS	NS	NS	NS	NS	NS	NS	NS	NS	NS	NS	NS	NS	NS	NS	NS	NS	NS	NS	NS	NS	NS	NS	NS	NS	NS	NS	NS	NS	NS	NS	NS	NS	NS	NS	NS	NS	NS	NS	NS	NS	NS	NS	NS	NS
coadread_tcga	TCGA-CM-6161-01	NS	NS	NS	NS	NS	NS	NS	NS	NS	NS	NS	NS	NS	NS	NS	NS	NS	NS	NS	NS	NS	NS	NS	NS	NS	NS	NS	NS	NS	NS	NS	NS	NS	NS	NS	NS	NS	NS	NS	NS	NS	NS	NS	NS	NS	NS	NS	NS
coadread_tcga	TCGA-CM-6162-01	NS	NS	NS	NS	NS	NS	NS	NS	NS	NS	NS	NS	NS	NS	NS	NS	NS	NS	NS	NS	NS	NS	NS	NS	NS	NS	NS	NS	NS	NS	NS	NS	NS	NS	NS	NS	NS	NS	NS	NS	NS	NS	NS	NS	NS	NS	NS	NS
coadread_tcga	TCGA-CM-6163-01	NS	NS	NS	NS	NS	NS	NS	NS	NS	NS	NS	NS	NS	NS	NS	NS	NS	NS	NS	NS	NS	NS	NS	NS	NS	NS	NS	NS	NS	NS	NS	NS	NS	NS	NS	NS	NS	NS	NS	NS	NS	NS	NS	NS	NS	NS	NS	NS
coadread_tcga	TCGA-CM-6164-01	NS	NS	NS	NS	NS	NS	NS	NS	NS	NS	NS	NS	NS	NS	NS	NS	NS	NS	NS	NS	NS	NS	NS	NS	NS	NS	NS	NS	NS	NS	NS	NS	NS	NS	NS	NS	NS	NS	NS	NS	NS	NS	NS	NS	NS	NS	NS	NS
coadread_tcga	TCGA-CM-6165-01	NS	NS	NS	NS	NS	NS	NS	NS	NS	NS	NS	NS	NS	NS	NS	NS	NS	NS	NS	NS	NS	NS	NS	NS	NS	NS	NS	NS	NS	NS	NS	NS	NS	NS	NS	NS	NS	NS	NS	NS	NS	NS	NS	NS	NS	NS	NS	NS
coadread_tcga	TCGA-CM-6166-01	NS	NS	NS	NS	NS	NS	NS	NS	NS	NS	NS	NS	NS	NS	NS	NS	NS	NS	NS	NS	NS	NS	NS	NS	NS	NS	NS	NS	NS	NS	NS	NS	NS	NS	NS	NS	NS	NS	NS	NS	NS	NS	NS	NS	NS	NS	NS	NS
coadread_tcga	TCGA-CM-6167-01	NS	NS	NS	NS	NS	NS	NS	NS	NS	NS	NS	NS	NS	NS	NS	NS	NS	NS	NS	NS	NS	NS	NS	NS	NS	NS	NS	NS	NS	NS	NS	NS	NS	NS	NS	NS	NS	NS	NS	NS	NS	NS	NS	NS	NS	NS	NS	NS
coadread_tcga	TCGA-CM-6168-01	NS	NS	NS	NS	NS	NS	NS	NS	NS	NS	NS	NS	NS	NS	NS	NS	NS	NS	NS	NS	NS	NS	NS	NS	NS	NS	NS	NS	NS	NS	NS	NS	NS	NS	NS	NS	NS	NS	NS	NS	NS	NS	NS	NS	NS	NS	NS	NS
coadread_tcga	TCGA-CM-6169-01	NS	NS	NS	NS	NS	NS	NS	NS	NS	NS	NS	NS	NS	NS	NS	NS	NS	NS	NS	NS	NS	NS	NS	NS	NS	NS	NS	NS	NS	NS	NS	NS	NS	NS	NS	NS	NS	NS	NS	NS	NS	NS	NS	NS	NS	NS	NS	NS
coadread_tcga	TCGA-CM-6170-01	NS	NS	NS	NS	NS	NS	NS	NS	NS	NS	NS	NS	NS	NS	NS	NS	NS	NS	NS	NS	NS	NS	NS	NS	NS	NS	NS	NS	NS	NS	NS	NS	NS	NS	NS	NS	NS	NS	NS	NS	NS	NS	NS	NS	NS	NS	NS	NS
coadread_tcga	TCGA-CM-6171-01	NS	NS	NS	NS	NS	NS	NS	NS	NS	NS	NS	NS	NS	NS	NS	NS	NS	NS	NS	NS	NS	NS	NS	NS	NS	NS	NS	NS	NS	NS	NS	NS	NS	NS	NS	NS	NS	NS	NS	NS	NS	NS	NS	NS	NS	NS	NS	NS
coadread_tcga	TCGA-CM-6172-01	NS	NS	NS	NS	NS	NS	NS	NS	NS	NS	NS	NS	NS	NS	NS	NS	NS	NS	NS	NS	NS	NS	NS	NS	NS	NS	NS	NS	NS	NS	NS	NS	NS	NS	NS	NS	NS	NS	NS	NS	NS	NS	NS	NS	NS	NS	NS	NS
coadread_tcga	TCGA-D5-5538-01	NS	NS	NS	NS	NS	NS	NS	NS	NS	NS	NS	NS	NS	NS	NS	NS	NS	NS	NS	NS	NS	NS	NS	NS	NS	NS	NS	NS	NS	NS	NS	NS	NS	NS	NS	NS	NS	NS	NS	NS	NS	NS	NS	NS	NS	NS	NS	NS
coadread_tcga	TCGA-D5-5539-01	NS	NS	NS	NS	NS	NS	NS	NS	NS	NS	NS	NS	NS	NS	NS	NS	NS	NS	NS	NS	NS	NS	NS	NS	NS	NS	NS	NS	NS	NS	NS	NS	NS	NS	NS	NS	NS	NS	NS	NS	NS	NS	NS	NS	NS	NS	NS	NS
coadread_tcga	TCGA-D5-5540-01	NS	NS	NS	NS	NS	NS	NS	NS	NS	NS	NS	NS	NS	NS	NS	NS	NS	NS	NS	NS	NS	NS	NS	NS	NS	NS	NS	NS	NS	NS	NS	NS	NS	NS	NS	NS	NS	NS	NS	NS	NS	NS	NS	NS	NS	NS	NS	NS
coadread_tcga	TCGA-D5-5541-01	NS	NS	NS	NS	NS	NS	NS	NS	NS	NS	NS	NS	NS	NS	NS	NS	NS	NS	NS	NS	NS	NS	NS	NS	NS	NS	NS	NS	NS	NS	NS	NS	NS	NS	NS	NS	NS	NS	NS	NS	NS	NS	NS	NS	NS	NS	NS	NS
coadread_tcga	TCGA-AF-3911-01	NS	NS	NS	NS	NS	NS	NS	NS	NS	NS	NS	NS	NS	NS	NS	NS	NS	NS	NS	NS	NS	NS	NS	NS	NS	NS	NS	NS	NS	NS	NS	NS	NS	NS	NS	NS	NS	NS	NS	NS	NS	NS	NS	NS	NS	NS	NS	NS
coadread_dfci_2016	coadread_dfci_2016_344232	WT	WT	WT	WT	WT	WT	WT	WT	WT	WT	WT	WT	WT	WT	WT	WT	WT	WT	WT	WT	WT	WT	WT	WT	WT	WT	WT	WT	WT	WT	WT	WT	WT	WT	I2147T	WT	WT	WT	WT	WT	WT	WT	WT	WT	WT	WT	WT	WT
coadread_tcga	TCGA-AG-3898-01	WT	WT	WT	WT	WT	WT	WT	WT	WT	WT	WT	WT	WT	WT	A3052S	WT	WT	WT	WT	WT	WT	WT	WT	WT	WT	WT	WT	WT	WT	WT	WT	WT	WT	WT	WT	WT	WT	WT	WT	WT	WT	WT	WT	WT	WT	WT	WT	WT
coadread_tcga	TCGA-AF-2692-01	WT	WT	WT	WT	WT	WT	WT	WT	WT	WT	WT	WT	WT	WT	WT	WT	WT	WT	WT	WT	WT	WT	WT	WT	WT	WT	WT	WT	WT	WT	WT	WT	WT	WT	WT	WT	WT	WT	WT	WT	WT	WT	WT	WT	WT	WT	WT	WT
coadread_tcga	TCGA-AG-A026-01	WT	WT	WT	WT	R2380W	L70P	WT	L1408R	WT	WT	WT	WT	WT	WT	WT	WT	WT	WT	WT	WT	WT	WT	WT	WT	WT	WT	WT	WT	WT	WT	WT	WT	WT	WT	WT	WT	WT	WT	E913D	WT	WT	WT	WT	WT	T1229A	WT	WT	WT
coadread_tcga	TCGA-CL-4957-01	NS	NS	NS	NS	NS	NS	NS	NS	NS	NS	NS	NS	NS	NS	NS	NS	NS	NS	NS	NS	NS	NS	NS	NS	NS	NS	NS	NS	NS	NS	NS	NS	NS	NS	NS	NS	NS	NS	NS	NS	NS	NS	NS	NS	NS	NS	NS	NS
coadread_tcga	TCGA-AG-3882-01	WT	WT	WT	WT	WT	WT	WT	WT	WT	WT	WT	D1753N	WT	WT	WT	WT	WT	WT	WT	WT	WT	WT	WT	WT	WT	WT	WT	WT	WT	WT	WT	WT	WT	WT	WT	WT	WT	WT	WT	WT	WT	WT	WT	WT	WT	WT	WT	WT
coadread_tcga	TCGA-AG-3894-01	WT	WT	WT	WT	WT	WT	WT	WT	WT	WT	WT	WT	WT	WT	WT	WT	WT	WT	WT	WT	WT	WT	I435L	WT	WT	WT	WT	WT	WT	WT	WT	WT	WT	WT	WT	WT	WT	WT	WT	WT	WT	WT	WT	WT	T1052M	WT	WT	WT
coadread_tcga	TCGA-AG-3896-01	WT	WT	WT	WT	WT	WT	WT	WT	WT	WT	WT	WT	WT	WT	WT	WT	WT	WT	WT	WT	WT	WT	WT	WT	WT	WT	WT	WT	WT	WT	WT	WT	WT	WT	WT	WT	WT	WT	WT	WT	WT	WT	WT	WT	WT	WT	WT	WT
coadread_tcga	TCGA-AF-2689-01	WT	WT	WT	WT	WT	WT	WT	WT	WT	WT	WT	WT	WT	WT	WT	WT	WT	WT	WT	WT	WT	WT	WT	WT	WT	WT	WT	WT	WT	WT	WT	WT	WT	WT	WT	WT	WT	WT	WT	WT	WT	WT	WT	WT	WT	WT	WT	WT
coadread_tcga	TCGA-AF-6784-01	NS	NS	NS	NS	NS	NS	NS	NS	NS	NS	NS	NS	NS	NS	NS	NS	NS	NS	NS	NS	NS	NS	NS	NS	NS	NS	NS	NS	NS	NS	NS	NS	NS	NS	NS	NS	NS	NS	NS	NS	NS	NS	NS	NS	NS	NS	NS	NS
coadread_tcga	TCGA-F5-6571-01	NS	NS	NS	NS	NS	NS	NS	NS	NS	NS	NS	NS	NS	NS	NS	NS	NS	NS	NS	NS	NS	NS	NS	NS	NS	NS	NS	NS	NS	NS	NS	NS	NS	NS	NS	NS	NS	NS	NS	NS	NS	NS	NS	NS	NS	NS	NS	NS
coadread_tcga	TCGA-AG-3909-01	WT	WT	WT	WT	WT	WT	WT	WT	WT	WT	WT	WT	WT	WT	WT	WT	WT	WT	WT	WT	WT	WT	WT	WT	WT	WT	WT	WT	WT	H753N	WT	WT	WT	WT	WT	WT	WT	WT	WT	WT	WT	WT	WT	WT	T217N	WT	WT	WT
coadread_tcga	TCGA-AG-A011-01	WT	WT	WT	WT	WT	WT	WT	WT	WT	WT	WT	WT	WT	R3784W	WT	WT	WT	WT	WT	WT	WT	WT	WT	WT	WT	WT	WT	E1144K	WT	WT	WT	WT	WT	WT	WT	WT	WT	WT	WT	WT	WT	WT	WT	WT	WT	WT	WT	WT
coadread_tcga	TCGA-CI-6622-01	NS	NS	NS	NS	NS	NS	NS	NS	NS	NS	NS	NS	NS	NS	NS	NS	NS	NS	NS	NS	NS	NS	NS	NS	NS	NS	NS	NS	NS	NS	NS	NS	NS	NS	NS	NS	NS	NS	NS	NS	NS	NS	NS	NS	NS	NS	NS	NS
coadread_tcga	TCGA-EI-6506-01	NS	NS	NS	NS	NS	NS	NS	NS	NS	NS	NS	NS	NS	NS	NS	NS	NS	NS	NS	NS	NS	NS	NS	NS	NS	NS	NS	NS	NS	NS	NS	NS	NS	NS	NS	NS	NS	NS	NS	NS	NS	NS	NS	NS	NS	NS	NS	NS
coadread_tcga	TCGA-AG-3601-01	WT	WT	WT	WT	WT	WT	WT	WT	WT	WT	WT	WT	WT	WT	WT	WT	WT	WT	WT	WT	WT	WT	WT	Q167K	WT	WT	WT	WT	WT	WT	WT	WT	WT	WT	WT	WT	WT	WT	WT	WT	WT	WT	WT	WT	WT	WT	WT	WT
coadread_tcga	TCGA-EI-6512-01	NS	NS	NS	NS	NS	NS	NS	NS	NS	NS	NS	NS	NS	NS	NS	NS	NS	NS	NS	NS	NS	NS	NS	NS	NS	NS	NS	NS	NS	NS	NS	NS	NS	NS	NS	NS	NS	NS	NS	NS	NS	NS	NS	NS	NS	NS	NS	NS
coadread_tcga	TCGA-AG-A036-01	WT	WT	WT	WT	WT	WT	WT	WT	WT	T57R	WT	WT	WT	WT	WT	WT	WT	WT	WT	WT	WT	WT	WT	WT	WT	WT	WT	WT	WT	WT	WT	WT	Q1437H	WT	WT	WT	WT	WT	WT	WT	WT	WT	WT	WT	WT	WT	WT	WT
coadread_tcga	TCGA-DC-4745-01	NS	NS	NS	NS	NS	NS	NS	NS	NS	NS	NS	NS	NS	NS	NS	NS	NS	NS	NS	NS	NS	NS	NS	NS	NS	NS	NS	NS	NS	NS	NS	NS	NS	NS	NS	NS	NS	NS	NS	NS	NS	NS	NS	NS	NS	NS	NS	NS
coadread_tcga	TCGA-AF-A56K-01	NS	NS	NS	NS	NS	NS	NS	NS	NS	NS	NS	NS	NS	NS	NS	NS	NS	NS	NS	NS	NS	NS	NS	NS	NS	NS	NS	NS	NS	NS	NS	NS	NS	NS	NS	NS	NS	NS	NS	NS	NS	NS	NS	NS	NS	NS	NS	NS
coadread_tcga	TCGA-AG-3593-01	WT	WT	WT	WT	WT	WT	WT	WT	WT	WT	WT	WT	WT	WT	WT	WT	WT	WT	WT	WT	WT	WT	WT	WT	WT	WT	WT	WT	WT	WT	WT	WT	WT	WT	WT	WT	WT	WT	WT	WT	WT	T715M	WT	WT	WT	WT	WT	WT
coadread_tcga	TCGA-AG-3587-01	WT	WT	WT	WT	WT	WT	WT	WT	WT	WT	WT	WT	WT	WT	WT	WT	WT	WT	WT	WT	WT	WT	WT	WT	WT	WT	WT	WT	WT	WT	WT	WT	WT	WT	WT	WT	WT	WT	WT	WT	WT	WT	WT	WT	WT	WT	WT	WT
coadread_tcga	TCGA-DC-6157-01	NS	NS	NS	NS	NS	NS	NS	NS	NS	NS	NS	NS	NS	NS	NS	NS	NS	NS	NS	NS	NS	NS	NS	NS	NS	NS	NS	NS	NS	NS	NS	NS	NS	NS	NS	NS	NS	NS	NS	NS	NS	NS	NS	NS	NS	NS	NS	NS
coadread_tcga	TCGA-AF-6655-01	NS	NS	NS	NS	NS	NS	NS	NS	NS	NS	NS	NS	NS	NS	NS	NS	NS	NS	NS	NS	NS	NS	NS	NS	NS	NS	NS	NS	NS	NS	NS	NS	NS	NS	NS	NS	NS	NS	NS	NS	NS	NS	NS	NS	NS	NS	NS	NS
coadread_tcga	TCGA-EI-6513-01	NS	NS	NS	NS	NS	NS	NS	NS	NS	NS	NS	NS	NS	NS	NS	NS	NS	NS	NS	NS	NS	NS	NS	NS	NS	NS	NS	NS	NS	NS	NS	NS	NS	NS	NS	NS	NS	NS	NS	NS	NS	NS	NS	NS	NS	NS	NS	NS
coadread_tcga	TCGA-AF-2687-01	NS	NS	NS	NS	NS	NS	NS	NS	NS	NS	NS	NS	NS	NS	NS	NS	NS	NS	NS	NS	NS	NS	NS	NS	NS	NS	NS	NS	NS	NS	NS	NS	NS	NS	NS	NS	NS	NS	NS	NS	NS	NS	NS	NS	NS	NS	NS	NS
coadread_tcga	TCGA-AG-3892-01	D1395Y V3325L	R552Q	V2161Sfs*98	WT	WT	L3116I S4317F	R1545I	WT	E530* E3028* K3103N	R106H	WT	R273H	WT	N1961H	WT	WT	WT	WT	WT	WT	WT	WT	R469Q S4937Y	WT	L2595I	A2526T	I293M S1647Y	WT	WT	L762* R404Q	WT	WT	F1443L	WT	F1939L S620Y S2296L	WT	F1039L	Q1585H	WT	WT	WT	WT	WT	WT	WT	T2560M	WT	E2419G
coadread_tcga	TCGA-AG-A016-01	WT	WT	WT	WT	WT	WT	WT	WT	WT	WT	WT	WT	WT	WT	WT	WT	WT	WT	WT	WT	WT	WT	WT	WT	WT	WT	WT	WT	WT	WT	WT	WT	WT	WT	WT	WT	WT	WT	WT	WT	WT	WT	WT	WT	WT	WT	WT	WT
coadread_tcga	TCGA-AH-6547-01	NS	NS	NS	NS	NS	NS	NS	NS	NS	NS	NS	NS	NS	NS	NS	NS	NS	NS	NS	NS	NS	NS	NS	NS	NS	NS	NS	NS	NS	NS	NS	NS	NS	NS	NS	NS	NS	NS	NS	NS	NS	NS	NS	NS	NS	NS	NS	NS
coadread_tcga	TCGA-AG-3999-01	WT	WT	WT	WT	WT	WT	WT	WT	WT	WT	WT	WT	WT	WT	WT	WT	WT	WT	WT	WT	WT	WT	WT	WT	WT	L2982F	WT	WT	WT	Q522R	WT	WT	WT	WT	WT	WT	WT	WT	WT	WT	WT	WT	WT	WT	WT	WT	WT	WT
coadread_tcga	TCGA-DC-6155-01	NS	NS	NS	NS	NS	NS	NS	NS	NS	NS	NS	NS	NS	NS	NS	NS	NS	NS	NS	NS	NS	NS	NS	NS	NS	NS	NS	NS	NS	NS	NS	NS	NS	NS	NS	NS	NS	NS	NS	NS	NS	NS	NS	NS	NS	NS	NS	NS
coadread_tcga	TCGA-F5-6864-01	NS	NS	NS	NS	NS	NS	NS	NS	NS	NS	NS	NS	NS	NS	NS	NS	NS	NS	NS	NS	NS	NS	NS	NS	NS	NS	NS	NS	NS	NS	NS	NS	NS	NS	NS	NS	NS	NS	NS	NS	NS	NS	NS	NS	NS	NS	NS	NS
coadread_tcga	TCGA-AG-3611-01	WT	WT	WT	V1137M	WT	WT	WT	WT	WT	T784A	WT	WT	WT	WT	WT	WT	WT	WT	WT	WT	WT	WT	WT	WT	WT	WT	WT	WT	WT	WT	WT	WT	WT	WT	WT	WT	WT	WT	WT	WT	WT	WT	WT	WT	WT	WT	WT	WT
coadread_tcga	TCGA-EI-6509-01	NS	NS	NS	NS	NS	NS	NS	NS	NS	NS	NS	NS	NS	NS	NS	NS	NS	NS	NS	NS	NS	NS	NS	NS	NS	NS	NS	NS	NS	NS	NS	NS	NS	NS	NS	NS	NS	NS	NS	NS	NS	NS	NS	NS	NS	NS	NS	NS
coadread_tcga	TCGA-F5-6861-01	NS	NS	NS	NS	NS	NS	NS	NS	NS	NS	NS	NS	NS	NS	NS	NS	NS	NS	NS	NS	NS	NS	NS	NS	NS	NS	NS	NS	NS	NS	NS	NS	NS	NS	NS	NS	NS	NS	NS	NS	NS	NS	NS	NS	NS	NS	NS	NS
coadread_tcga	TCGA-F5-6814-01	NS	NS	NS	NS	NS	NS	NS	NS	NS	NS	NS	NS	NS	NS	NS	NS	NS	NS	NS	NS	NS	NS	NS	NS	NS	NS	NS	NS	NS	NS	NS	NS	NS	NS	NS	NS	NS	NS	NS	NS	NS	NS	NS	NS	NS	NS	NS	NS
coadread_tcga	TCGA-AG-A01W-01	WT	WT	WT	P959Q	WT	WT	WT	WT	WT	WT	WT	WT	G798D	WT	WT	WT	WT	WT	R3470W	WT	WT	WT	WT	WT	WT	WT	WT	WT	WT	WT	WT	WT	WT	WT	WT	WT	WT	WT	WT	WT	WT	WT	WT	WT	WT	WT	WT	WT
coadread_tcga	TCGA-F5-6813-01	NS	NS	NS	NS	NS	NS	NS	NS	NS	NS	NS	NS	NS	NS	NS	NS	NS	NS	NS	NS	NS	NS	NS	NS	NS	NS	NS	NS	NS	NS	NS	NS	NS	NS	NS	NS	NS	NS	NS	NS	NS	NS	NS	NS	NS	NS	NS	NS
coadread_tcga	TCGA-AG-3732-01	NS	NS	NS	NS	NS	NS	NS	NS	NS	NS	NS	NS	NS	NS	NS	NS	NS	NS	NS	NS	NS	NS	NS	NS	NS	NS	NS	NS	NS	NS	NS	NS	NS	NS	NS	NS	NS	NS	NS	NS	NS	NS	NS	NS	NS	NS	NS	NS
coadread_tcga	TCGA-EI-6885-01	NS	NS	NS	NS	NS	NS	NS	NS	NS	NS	NS	NS	NS	NS	NS	NS	NS	NS	NS	NS	NS	NS	NS	NS	NS	NS	NS	NS	NS	NS	NS	NS	NS	NS	NS	NS	NS	NS	NS	NS	NS	NS	NS	NS	NS	NS	NS	NS
coadread_tcga	TCGA-AF-3914-01	NS	NS	NS	NS	NS	NS	NS	NS	NS	NS	NS	NS	NS	NS	NS	NS	NS	NS	NS	NS	NS	NS	NS	NS	NS	NS	NS	NS	NS	NS	NS	NS	NS	NS	NS	NS	NS	NS	NS	NS	NS	NS	NS	NS	NS	NS	NS	NS
coadread_tcga	TCGA-DY-A1H8-01	NS	NS	NS	NS	NS	NS	NS	NS	NS	NS	NS	NS	NS	NS	NS	NS	NS	NS	NS	NS	NS	NS	NS	NS	NS	NS	NS	NS	NS	NS	NS	NS	NS	NS	NS	NS	NS	NS	NS	NS	NS	NS	NS	NS	NS	NS	NS	NS
coadread_tcga	TCGA-AG-3726-01	WT	WT	WT	WT	WT	WT	WT	WT	WT	WT	WT	WT	WT	WT	WT	WT	WT	WT	Q809H	WT	WT	WT	WT	WT	WT	T2433M T1513I	WT	WT	WT	WT	E75D	WT	WT	WT	WT	WT	WT	WT	WT	WT	WT	WT	WT	WT	WT	WT	WT	WT
coadread_tcga	TCGA-AG-3598-01	WT	WT	WT	WT	WT	WT	WT	WT	WT	WT	WT	WT	WT	WT	WT	WT	WT	WT	WT	WT	WT	WT	WT	WT	WT	WT	WT	WT	WT	WT	WT	WT	WT	WT	WT	WT	WT	E2651K	WT	WT	WT	WT	WT	WT	WT	G947R	WT	WT
coadread_tcga	TCGA-DC-4749-01	NS	NS	NS	NS	NS	NS	NS	NS	NS	NS	NS	NS	NS	NS	NS	NS	NS	NS	NS	NS	NS	NS	NS	NS	NS	NS	NS	NS	NS	NS	NS	NS	NS	NS	NS	NS	NS	NS	NS	NS	NS	NS	NS	NS	NS	NS	NS	NS
coadread_tcga	TCGA-DT-5265-01	NS	NS	NS	NS	NS	NS	NS	NS	NS	NS	NS	NS	NS	NS	NS	NS	NS	NS	NS	NS	NS	NS	NS	NS	NS	NS	NS	NS	NS	NS	NS	NS	NS	NS	NS	NS	NS	NS	NS	NS	NS	NS	NS	NS	NS	NS	NS	NS
coadread_tcga	TCGA-DY-A1DE-01	NS	NS	NS	NS	NS	NS	NS	NS	NS	NS	NS	NS	NS	NS	NS	NS	NS	NS	NS	NS	NS	NS	NS	NS	NS	NS	NS	NS	NS	NS	NS	NS	NS	NS	NS	NS	NS	NS	NS	NS	NS	NS	NS	NS	NS	NS	NS	NS
coadread_tcga	TCGA-DC-6160-01	NS	NS	NS	NS	NS	NS	NS	NS	NS	NS	NS	NS	NS	NS	NS	NS	NS	NS	NS	NS	NS	NS	NS	NS	NS	NS	NS	NS	NS	NS	NS	NS	NS	NS	NS	NS	NS	NS	NS	NS	NS	NS	NS	NS	NS	NS	NS	NS
coadread_tcga	TCGA-AG-3608-01	WT	WT	WT	Y423*	WT	WT	WT	WT	WT	WT	WT	WT	WT	WT	WT	WT	WT	WT	WT	WT	WT	WT	WT	WT	WT	WT	WT	WT	WT	WT	WT	WT	WT	WT	WT	WT	WT	WT	WT	WT	WT	WT	WT	WT	WT	WT	WT	WT
coadread_tcga	TCGA-F5-6863-01	NS	NS	NS	NS	NS	NS	NS	NS	NS	NS	NS	NS	NS	NS	NS	NS	NS	NS	NS	NS	NS	NS	NS	NS	NS	NS	NS	NS	NS	NS	NS	NS	NS	NS	NS	NS	NS	NS	NS	NS	NS	NS	NS	NS	NS	NS	NS	NS
coadread_tcga	TCGA-AF-A56L-01	NS	NS	NS	NS	NS	NS	NS	NS	NS	NS	NS	NS	NS	NS	NS	NS	NS	NS	NS	NS	NS	NS	NS	NS	NS	NS	NS	NS	NS	NS	NS	NS	NS	NS	NS	NS	NS	NS	NS	NS	NS	NS	NS	NS	NS	NS	NS	NS
coadread_tcga	TCGA-AG-3902-01	R3949*	WT	WT	WT	WT	WT	N1733S	WT	WT	WT	WT	WT	WT	WT	WT	WT	WT	WT	WT	WT	WT	WT	WT	WT	WT	WT	WT	WT	WT	WT	WT	WT	WT	WT	R1944Q	WT	WT	WT	WT	WT	WT	WT	WT	WT	WT	WT	WT	WT
coadread_tcga	TCGA-EI-6511-01	NS	NS	NS	NS	NS	NS	NS	NS	NS	NS	NS	NS	NS	NS	NS	NS	NS	NS	NS	NS	NS	NS	NS	NS	NS	NS	NS	NS	NS	NS	NS	NS	NS	NS	NS	NS	NS	NS	NS	NS	NS	NS	NS	NS	NS	NS	NS	NS
coadread_tcga	TCGA-AH-6644-01	NS	NS	NS	NS	NS	NS	NS	NS	NS	NS	NS	NS	NS	NS	NS	NS	NS	NS	NS	NS	NS	NS	NS	NS	NS	NS	NS	NS	NS	NS	NS	NS	NS	NS	NS	NS	NS	NS	NS	NS	NS	NS	NS	NS	NS	NS	NS	NS
coadread_tcga	TCGA-AF-2693-01	NS	NS	NS	NS	NS	NS	NS	NS	NS	NS	NS	NS	NS	NS	NS	NS	NS	NS	NS	NS	NS	NS	NS	NS	NS	NS	NS	NS	NS	NS	NS	NS	NS	NS	NS	NS	NS	NS	NS	NS	NS	NS	NS	NS	NS	NS	NS	NS
coadread_tcga	TCGA-AF-3400-01	WT	WT	WT	WT	WT	WT	WT	WT	WT	WT	WT	WT	WT	WT	WT	WT	WT	WT	WT	WT	WT	WT	WT	R1496H	WT	WT	WT	WT	WT	WT	WT	WT	WT	WT	WT	WT	WT	WT	WT	WT	WT	WT	WT	WT	WT	WT	WT	WT
coadread_tcga	TCGA-AF-4110-01	NS	NS	NS	NS	NS	NS	NS	NS	NS	NS	NS	NS	NS	NS	NS	NS	NS	NS	NS	NS	NS	NS	NS	NS	NS	NS	NS	NS	NS	NS	NS	NS	NS	NS	NS	NS	NS	NS	NS	NS	NS	NS	NS	NS	NS	NS	NS	NS
coadread_tcga	TCGA-AG-A032-01	WT	WT	WT	WT	WT	WT	WT	WT	WT	WT	WT	WT	WT	WT	WT	WT	WT	WT	WT	WT	WT	WT	WT	WT	WT	WT	WT	WT	WT	WT	WT	WT	WT	WT	WT	WT	WT	WT	WT	WT	WT	WT	WT	WT	WT	WT	WT	WT
coadread_tcga	TCGA-CI-6620-01	NS	NS	NS	NS	NS	NS	NS	NS	NS	NS	NS	NS	NS	NS	NS	NS	NS	NS	NS	NS	NS	NS	NS	NS	NS	NS	NS	NS	NS	NS	NS	NS	NS	NS	NS	NS	NS	NS	NS	NS	NS	NS	NS	NS	NS	NS	NS	NS
coadread_tcga	TCGA-DC-6156-01	NS	NS	NS	NS	NS	NS	NS	NS	NS	NS	NS	NS	NS	NS	NS	NS	NS	NS	NS	NS	NS	NS	NS	NS	NS	NS	NS	NS	NS	NS	NS	NS	NS	NS	NS	NS	NS	NS	NS	NS	NS	NS	NS	NS	NS	NS	NS	NS
coadread_tcga	TCGA-AG-3581-01	WT	WT	WT	WT	WT	WT	WT	WT	WT	WT	WT	WT	WT	WT	WT	WT	WT	WT	WT	WT	WT	WT	WT	WT	WT	WT	WT	WT	WT	WT	WT	WT	WT	WT	WT	WT	WT	WT	WT	WT	WT	WT	WT	WT	WT	WT	WT	WT
coadread_tcga	TCGA-DC-6158-01	NS	NS	NS	NS	NS	NS	NS	NS	NS	NS	NS	NS	NS	NS	NS	NS	NS	NS	NS	NS	NS	NS	NS	NS	NS	NS	NS	NS	NS	NS	NS	NS	NS	NS	NS	NS	NS	NS	NS	NS	NS	NS	NS	NS	NS	NS	NS	NS
coadread_tcga	TCGA-AG-3742-01	NS	NS	NS	NS	NS	NS	NS	NS	NS	NS	NS	NS	NS	NS	NS	NS	NS	NS	NS	NS	NS	NS	NS	NS	NS	NS	NS	NS	NS	NS	NS	NS	NS	NS	NS	NS	NS	NS	NS	NS	NS	NS	NS	NS	NS	NS	NS	NS
coadread_dfci_2016	coadread_dfci_2016_3512	WT	WT	WT	WT	WT	WT	WT	WT	WT	WT	WT	WT	WT	WT	WT	WT	WT	T2886=	WT	WT	WT	WT	WT	WT	WT	WT	WT	WT	WT	WT	WT	WT	WT	WT	WT	WT	WT	WT	WT	WT	WT	WT	WT	WT	WT	WT	WT	WT
coadread_tcga	TCGA-CI-6624-01	NS	NS	NS	NS	NS	NS	NS	NS	NS	NS	NS	NS	NS	NS	NS	NS	NS	NS	NS	NS	NS	NS	NS	NS	NS	NS	NS	NS	NS	NS	NS	NS	NS	NS	NS	NS	NS	NS	NS	NS	NS	NS	NS	NS	NS	NS	NS	NS
coadread_tcga	TCGA-AG-4007-01	WT	WT	WT	WT	WT	WT	WT	WT	WT	WT	WT	WT	WT	WT	WT	WT	WT	WT	WT	WT	WT	WT	WT	WT	WT	WT	WT	WT	WT	WT	WT	WT	WT	WT	WT	WT	WT	E2254Q	WT	WT	WT	WT	WT	WT	WT	WT	WT	WT
coadread_tcga	TCGA-AG-3591-01	NS	NS	NS	NS	NS	NS	NS	NS	NS	NS	NS	NS	NS	NS	NS	NS	NS	NS	NS	NS	NS	NS	NS	NS	NS	NS	NS	NS	NS	NS	NS	NS	NS	NS	NS	NS	NS	NS	NS	NS	NS	NS	NS	NS	NS	NS	NS	NS
coadread_tcga	TCGA-AH-6643-01	NS	NS	NS	NS	NS	NS	NS	NS	NS	NS	NS	NS	NS	NS	NS	NS	NS	NS	NS	NS	NS	NS	NS	NS	NS	NS	NS	NS	NS	NS	NS	NS	NS	NS	NS	NS	NS	NS	NS	NS	NS	NS	NS	NS	NS	NS	NS	NS
coadread_tcga	TCGA-F5-6812-01	NS	NS	NS	NS	NS	NS	NS	NS	NS	NS	NS	NS	NS	NS	NS	NS	NS	NS	NS	NS	NS	NS	NS	NS	NS	NS	NS	NS	NS	NS	NS	NS	NS	NS	NS	NS	NS	NS	NS	NS	NS	NS	NS	NS	NS	NS	NS	NS
coadread_tcga	TCGA-DY-A1DG-01	NS	NS	NS	NS	NS	NS	NS	NS	NS	NS	NS	NS	NS	NS	NS	NS	NS	NS	NS	NS	NS	NS	NS	NS	NS	NS	NS	NS	NS	NS	NS	NS	NS	NS	NS	NS	NS	NS	NS	NS	NS	NS	NS	NS	NS	NS	NS	NS
coadread_tcga	TCGA-EI-6884-01	NS	NS	NS	NS	NS	NS	NS	NS	NS	NS	NS	NS	NS	NS	NS	NS	NS	NS	NS	NS	NS	NS	NS	NS	NS	NS	NS	NS	NS	NS	NS	NS	NS	NS	NS	NS	NS	NS	NS	NS	NS	NS	NS	NS	NS	NS	NS	NS
coadread_tcga	TCGA-AG-3890-01	WT	WT	WT	WT	WT	WT	WT	WT	WT	WT	WT	WT	WT	WT	WT	WT	WT	WT	WT	WT	WT	WT	WT	WT	WT	P2784S	WT	WT	WT	WT	WT	WT	WT	WT	WT	WT	WT	WT	WT	WT	WT	WT	WT	WT	WT	WT	WT	WT
coadread_tcga	TCGA-AG-A002-01	E4076K R368I F866C E1942* E2213D	S1279Y R1261* R1196W H403N	G4576D	K947N F571L	S1641Y	E1160* L660V K1098E D1255= E1322* E1790K D1905Y L1979I L3543I I3644M	R245* R1545I R597I D1322Y L1119I S480L F170Y	E3D N204H E670* K736= K877N V2169G V2245= S2315Y	E978* R3298Q T5138M R5689W	D802Y	R3021I R1910W S1318Y N788H	R1355Q D1333Y E2836* S3019L	D417G	E124D P389H G411D S523N T900P A1330S G1631V R1879Q S2044I K4096N R4454H R4728Q A4850T S4915N	R3117H S2663Y S1723N E323G	WT	R4203H G4182* K2895N V2654I D1905Y K692T D282N	WT	A1293D	E1144K R1893C P193H	R2743Q A1052V K556N	K2984T C935*	S3750L N421H T641N M727I N1788T L2030V L2710F	E110K A193V L832I D899E	R1727W F2722L F2182L F1868C S1738Y A1568V F558L	K2675N D2181N I1222L D910Y P784T	S556N	R1075C A1969T E1005D E582*	F1118L	D1986N K2491N Y1970* A1802T R1515Q D1465Y L901F	WT	R1712I E2668A	L1216I F279L	R928I E1479K R2003*	R1375C T160M G386R S1851F	F1909V R1347C P787H	S930Y K1637N P2749S	L2783I R2661I R2586I Y1572H E1425* K250N	WT	WT	WT	E1968K E888*	D588G E1973D E1102K	K5N	E534K F402C	A210V R177C R807C	K1535N A2236T L2086V S560*	R4272* A4028S S2894* L2555I L2502V S155P
coadread_tcga	TCGA-F5-6810-01	NS	NS	NS	NS	NS	NS	NS	NS	NS	NS	NS	NS	NS	NS	NS	NS	NS	NS	NS	NS	NS	NS	NS	NS	NS	NS	NS	NS	NS	NS	NS	NS	NS	NS	NS	NS	NS	NS	NS	NS	NS	NS	NS	NS	NS	NS	NS	NS
coadread_tcga	TCGA-AG-3727-01	WT	WT	WT	WT	WT	WT	WT	WT	WT	WT	WT	WT	WT	WT	WT	WT	WT	WT	WT	WT	WT	WT	WT	WT	WT	WT	WT	WT	R225Q	WT	WT	WT	WT	WT	WT	WT	WT	WT	WT	WT	WT	WT	WT	WT	WT	WT	WT	WT
coadread_tcga	TCGA-DC-6681-01	NS	NS	NS	NS	NS	NS	NS	NS	NS	NS	NS	NS	NS	NS	NS	NS	NS	NS	NS	NS	NS	NS	NS	NS	NS	NS	NS	NS	NS	NS	NS	NS	NS	NS	NS	NS	NS	NS	NS	NS	NS	NS	NS	NS	NS	NS	NS	NS
coadread_tcga	TCGA-AG-4022-01	NS	NS	NS	NS	NS	NS	NS	NS	NS	NS	NS	NS	NS	NS	NS	NS	NS	NS	NS	NS	NS	NS	NS	NS	NS	NS	NS	NS	NS	NS	NS	NS	NS	NS	NS	NS	NS	NS	NS	NS	NS	NS	NS	NS	NS	NS	NS	NS
coadread_tcga	TCGA-EI-6514-01	NS	NS	NS	NS	NS	NS	NS	NS	NS	NS	NS	NS	NS	NS	NS	NS	NS	NS	NS	NS	NS	NS	NS	NS	NS	NS	NS	NS	NS	NS	NS	NS	NS	NS	NS	NS	NS	NS	NS	NS	NS	NS	NS	NS	NS	NS	NS	NS
coadread_tcga	TCGA-DY-A1DC-01	NS	NS	NS	NS	NS	NS	NS	NS	NS	NS	NS	NS	NS	NS	NS	NS	NS	NS	NS	NS	NS	NS	NS	NS	NS	NS	NS	NS	NS	NS	NS	NS	NS	NS	NS	NS	NS	NS	NS	NS	NS	NS	NS	NS	NS	NS	NS	NS
coadread_tcga	TCGA-AG-3887-01	WT	WT	WT	V582F	WT	WT	WT	WT	WT	WT	WT	WT	WT	WT	WT	WT	WT	WT	WT	WT	WT	WT	WT	WT	WT	WT	WT	WT	WT	WT	WT	WT	WT	WT	WT	WT	WT	WT	WT	WT	WT	WT	WT	WT	WT	WT	WT	WT
coadread_tcga	TCGA-DC-5869-01	NS	NS	NS	NS	NS	NS	NS	NS	NS	NS	NS	NS	NS	NS	NS	NS	NS	NS	NS	NS	NS	NS	NS	NS	NS	NS	NS	NS	NS	NS	NS	NS	NS	NS	NS	NS	NS	NS	NS	NS	NS	NS	NS	NS	NS	NS	NS	NS
coadread_tcga	TCGA-AG-3885-01	NS	NS	NS	NS	NS	NS	NS	NS	NS	NS	NS	NS	NS	NS	NS	NS	NS	NS	NS	NS	NS	NS	NS	NS	NS	NS	NS	NS	NS	NS	NS	NS	NS	NS	NS	NS	NS	NS	NS	NS	NS	NS	NS	NS	NS	NS	NS	NS
coadread_tcga	TCGA-EI-7004-01	NS	NS	NS	NS	NS	NS	NS	NS	NS	NS	NS	NS	NS	NS	NS	NS	NS	NS	NS	NS	NS	NS	NS	NS	NS	NS	NS	NS	NS	NS	NS	NS	NS	NS	NS	NS	NS	NS	NS	NS	NS	NS	NS	NS	NS	NS	NS	NS
coadread_tcga	TCGA-AG-4015-01	WT	WT	WT	WT	WT	WT	WT	WT	WT	R372H	WT	WT	WT	WT	WT	WT	WT	WT	WT	WT	WT	WT	WT	WT	WT	WT	WT	WT	WT	WT	WT	WT	WT	WT	WT	WT	WT	WT	WT	WT	WT	WT	WT	WT	WT	WT	WT	WT
coadread_tcga	TCGA-AG-4021-01	NS	NS	NS	NS	NS	NS	NS	NS	NS	NS	NS	NS	NS	NS	NS	NS	NS	NS	NS	NS	NS	NS	NS	NS	NS	NS	NS	NS	NS	NS	NS	NS	NS	NS	NS	NS	NS	NS	NS	NS	NS	NS	NS	NS	NS	NS	NS	NS
coadread_tcga	TCGA-AG-A025-01	WT	WT	WT	WT	WT	WT	WT	WT	WT	WT	WT	WT	WT	WT	WT	WT	WT	WT	WT	WT	WT	WT	WT	WT	WT	WT	WT	WT	WT	WT	WT	WT	WT	WT	WT	WT	WT	WT	WT	WT	WT	WT	WT	WT	WT	WT	WT	WT
coadread_tcga	TCGA-AG-3578-01	WT	WT	WT	WT	WT	WT	WT	WT	WT	WT	WT	WT	WT	WT	WT	WT	WT	WT	WT	WT	WT	WT	WT	WT	WT	WT	WT	WT	WT	WT	WT	WT	WT	WT	WT	WT	WT	WT	WT	WT	WT	WT	WT	WT	WT	WT	WT	WT
coadread_tcga	TCGA-AG-A020-01	E4261*	WT	WT	WT	WT	WT	WT	WT	WT	WT	WT	WT	WT	WT	WT	WT	WT	WT	WT	WT	WT	WT	WT	WT	WT	WT	P1165T	WT	WT	WT	WT	WT	WT	WT	WT	WT	E2044K	WT	WT	WT	R884H	WT	WT	WT	WT	WT	WT	WT
coadread_tcga	TCGA-AF-2691-01	WT	E1348*	WT	WT	WT	WT	WT	WT	WT	WT	WT	WT	WT	WT	WT	WT	WT	WT	WT	WT	WT	WT	WT	WT	WT	WT	WT	WT	WT	WT	WT	WT	WT	WT	WT	WT	WT	WT	WT	WT	WT	WT	WT	WT	WT	WT	WT	WT
coadread_tcga	TCGA-AG-A01Y-01	WT	WT	WT	WT	WT	WT	WT	WT	WT	WT	WT	WT	WT	WT	WT	WT	WT	WT	WT	WT	WT	WT	WT	WT	WT	WT	WT	WT	WT	WT	WT	WT	WT	WT	WT	WT	WT	WT	WT	WT	WT	WT	WT	WT	WT	WT	WT	WT
coadread_tcga	TCGA-AH-6903-01	NS	NS	NS	NS	NS	NS	NS	NS	NS	NS	NS	NS	NS	NS	NS	NS	NS	NS	NS	NS	NS	NS	NS	NS	NS	NS	NS	NS	NS	NS	NS	NS	NS	NS	NS	NS	NS	NS	NS	NS	NS	NS	NS	NS	NS	NS	NS	NS
coadread_tcga	TCGA-AG-3881-01	WT	WT	WT	WT	WT	WT	WT	WT	WT	WT	WT	WT	WT	WT	R520Q	WT	WT	WT	WT	WT	WT	WT	WT	WT	WT	WT	WT	WT	WT	WT	WT	WT	WT	WT	WT	WT	WT	WT	WT	WT	WT	WT	WT	M1?	WT	WT	WT	WT
coadread_tcga	TCGA-G5-6235-01	NS	NS	NS	NS	NS	NS	NS	NS	NS	NS	NS	NS	NS	NS	NS	NS	NS	NS	NS	NS	NS	NS	NS	NS	NS	NS	NS	NS	NS	NS	NS	NS	NS	NS	NS	NS	NS	NS	NS	NS	NS	NS	NS	NS	NS	NS	NS	NS
coadread_tcga	TCGA-DC-5337-01	NS	NS	NS	NS	NS	NS	NS	NS	NS	NS	NS	NS	NS	NS	NS	NS	NS	NS	NS	NS	NS	NS	NS	NS	NS	NS	NS	NS	NS	NS	NS	NS	NS	NS	NS	NS	NS	NS	NS	NS	NS	NS	NS	NS	NS	NS	NS	NS
coadread_tcga	TCGA-AG-A01N-01	NS	NS	NS	NS	NS	NS	NS	NS	NS	NS	NS	NS	NS	NS	NS	NS	NS	NS	NS	NS	NS	NS	NS	NS	NS	NS	NS	NS	NS	NS	NS	NS	NS	NS	NS	NS	NS	NS	NS	NS	NS	NS	NS	NS	NS	NS	NS	NS
coadread_tcga	TCGA-AH-6544-01	NS	NS	NS	NS	NS	NS	NS	NS	NS	NS	NS	NS	NS	NS	NS	NS	NS	NS	NS	NS	NS	NS	NS	NS	NS	NS	NS	NS	NS	NS	NS	NS	NS	NS	NS	NS	NS	NS	NS	NS	NS	NS	NS	NS	NS	NS	NS	NS
coadread_tcga	TCGA-AG-A01L-01	WT	WT	WT	WT	WT	WT	WT	WT	WT	WT	WT	WT	WT	WT	WT	WT	WT	WT	WT	WT	WT	WT	WT	WT	WT	WT	WT	WT	WT	WT	WT	WT	WT	WT	WT	WT	WT	WT	WT	WT	WT	WT	WT	WT	WT	WT	WT	WT
coadread_tcga	TCGA-CI-6621-01	NS	NS	NS	NS	NS	NS	NS	NS	NS	NS	NS	NS	NS	NS	NS	NS	NS	NS	NS	NS	NS	NS	NS	NS	NS	NS	NS	NS	NS	NS	NS	NS	NS	NS	NS	NS	NS	NS	NS	NS	NS	NS	NS	NS	NS	NS	NS	NS
coadread_tcga	TCGA-AG-3878-01	WT	WT	WT	WT	WT	WT	WT	WT	WT	WT	WT	WT	WT	WT	WT	WT	WT	WT	WT	WT	WT	WT	WT	WT	WT	WT	WT	WT	WT	WT	WT	WT	WT	WT	WT	WT	WT	WT	WT	WT	WT	WT	WT	WT	WT	WT	WT	WT
coadread_dfci_2016	coadread_dfci_2016_3242	WT	WT	WT	WT	P1108L	WT	WT	WT	WT	WT	WT	WT	WT	WT	WT	WT	WT	WT	WT	WT	WT	WT	WT	WT	WT	WT	WT	WT	WT	WT	WT	WT	WT	WT	WT	WT	WT	WT	WT	WT	WT	WT	WT	WT	WT	WT	WT	WT
coadread_tcga	TCGA-CL-5917-01	NS	NS	NS	NS	NS	NS	NS	NS	NS	NS	NS	NS	NS	NS	NS	NS	NS	NS	NS	NS	NS	NS	NS	NS	NS	NS	NS	NS	NS	NS	NS	NS	NS	NS	NS	NS	NS	NS	NS	NS	NS	NS	NS	NS	NS	NS	NS	NS
coadread_tcga	TCGA-AG-3731-01	NS	NS	NS	NS	NS	NS	NS	NS	NS	NS	NS	NS	NS	NS	NS	NS	NS	NS	NS	NS	NS	NS	NS	NS	NS	NS	NS	NS	NS	NS	NS	NS	NS	NS	NS	NS	NS	NS	NS	NS	NS	NS	NS	NS	NS	NS	NS	NS
coadread_tcga	TCGA-AG-3580-01	WT	WT	WT	WT	WT	WT	WT	H61Y	WT	WT	WT	WT	WT	WT	WT	WT	WT	WT	WT	WT	WT	WT	WT	WT	WT	WT	WT	WT	WT	WT	WT	WT	WT	WT	WT	WT	WT	WT	WT	WT	WT	WT	WT	WT	WT	WT	WT	WT
coadread_tcga	TCGA-AG-3605-01	K3929M	WT	WT	WT	WT	WT	WT	G1320R	WT	WT	WT	WT	WT	WT	WT	WT	WT	WT	WT	WT	WT	WT	WT	WT	WT	WT	WT	WT	WT	WT	WT	WT	WT	WT	WT	WT	WT	WT	WT	WT	WT	WT	WT	WT	WT	WT	WT	WT
coadread_tcga	TCGA-DC-6683-01	NS	NS	NS	NS	NS	NS	NS	NS	NS	NS	NS	NS	NS	NS	NS	NS	NS	NS	NS	NS	NS	NS	NS	NS	NS	NS	NS	NS	NS	NS	NS	NS	NS	NS	NS	NS	NS	NS	NS	NS	NS	NS	NS	NS	NS	NS	NS	NS
coadread_tcga	TCGA-AG-4008-01	WT	WT	WT	WT	WT	WT	WT	WT	WT	WT	WT	WT	WT	WT	WT	WT	WT	WT	WT	WT	WT	WT	WT	WT	WT	WT	WT	T346M	WT	WT	WT	WT	WT	WT	WT	WT	WT	WT	WT	WT	WT	WT	WT	WT	WT	WT	WT	WT
coadread_tcga	TCGA-AG-3891-01	NS	NS	NS	NS	NS	NS	NS	NS	NS	NS	NS	NS	NS	NS	NS	NS	NS	NS	NS	NS	NS	NS	NS	NS	NS	NS	NS	NS	NS	NS	NS	NS	NS	NS	NS	NS	NS	NS	NS	NS	NS	NS	NS	NS	NS	NS	NS	NS
coadread_tcga	TCGA-EI-6882-01	NS	NS	NS	NS	NS	NS	NS	NS	NS	NS	NS	NS	NS	NS	NS	NS	NS	NS	NS	NS	NS	NS	NS	NS	NS	NS	NS	NS	NS	NS	NS	NS	NS	NS	NS	NS	NS	NS	NS	NS	NS	NS	NS	NS	NS	NS	NS	NS
coadread_tcga	TCGA-DY-A1DF-01	NS	NS	NS	NS	NS	NS	NS	NS	NS	NS	NS	NS	NS	NS	NS	NS	NS	NS	NS	NS	NS	NS	NS	NS	NS	NS	NS	NS	NS	NS	NS	NS	NS	NS	NS	NS	NS	NS	NS	NS	NS	NS	NS	NS	NS	NS	NS	NS
coadread_tcga	TCGA-AG-3612-01	WT	WT	WT	WT	WT	WT	WT	WT	WT	WT	WT	Q1484*	WT	WT	WT	WT	WT	WT	WT	WT	WT	WT	WT	WT	WT	WT	WT	WT	WT	WT	WT	WT	WT	WT	WT	WT	WT	WT	WT	WT	WT	WT	WT	WT	WT	WT	WT	WT
coadread_tcga	TCGA-AG-A02N-01	WT	R559*	WT	WT	WT	WT	WT	P2814S	WT	WT	WT	WT	WT	WT	WT	E49K V319M	WT	WT	WT	WT	R1288H	WT	WT	WT	WT	WT	R1449C	WT	WT	WT	T1514M	R1826*	WT	WT	WT	WT	WT	WT	WT	WT	WT	WT	WT	Q1018*	A556V	A967V R774H	WT	WT
coadread_tcga	TCGA-DC-6154-01	NS	NS	NS	NS	NS	NS	NS	NS	NS	NS	NS	NS	NS	NS	NS	NS	NS	NS	NS	NS	NS	NS	NS	NS	NS	NS	NS	NS	NS	NS	NS	NS	NS	NS	NS	NS	NS	NS	NS	NS	NS	NS	NS	NS	NS	NS	NS	NS
coadread_tcga	TCGA-F5-6811-01	NS	NS	NS	NS	NS	NS	NS	NS	NS	NS	NS	NS	NS	NS	NS	NS	NS	NS	NS	NS	NS	NS	NS	NS	NS	NS	NS	NS	NS	NS	NS	NS	NS	NS	NS	NS	NS	NS	NS	NS	NS	NS	NS	NS	NS	NS	NS	NS
coadread_tcga	TCGA-AG-4001-01	WT	WT	WT	R208Q	WT	WT	WT	WT	WT	WT	WT	WT	WT	WT	WT	WT	WT	WT	WT	WT	WT	WT	WT	WT	WT	WT	WT	WT	WT	WT	WT	WT	WT	R1932H	WT	WT	WT	WT	WT	WT	WT	WT	WT	C1252*	WT	WT	WT	WT
coadread_tcga	TCGA-AF-A56N-01	NS	NS	NS	NS	NS	NS	NS	NS	NS	NS	NS	NS	NS	NS	NS	NS	NS	NS	NS	NS	NS	NS	NS	NS	NS	NS	NS	NS	NS	NS	NS	NS	NS	NS	NS	NS	NS	NS	NS	NS	NS	NS	NS	NS	NS	NS	NS	NS
coadread_tcga	TCGA-AF-6672-01	NS	NS	NS	NS	NS	NS	NS	NS	NS	NS	NS	NS	NS	NS	NS	NS	NS	NS	NS	NS	NS	NS	NS	NS	NS	NS	NS	NS	NS	NS	NS	NS	NS	NS	NS	NS	NS	NS	NS	NS	NS	NS	NS	NS	NS	NS	NS	NS
coadread_tcga	TCGA-AG-A00C-01	WT	WT	WT	WT	WT	WT	WT	WT	WT	WT	WT	WT	WT	WT	WT	WT	WT	WT	WT	WT	WT	WT	WT	WT	WT	WT	WT	WT	WT	WT	WT	WT	WT	WT	WT	WT	WT	WT	WT	WT	WT	WT	WT	WT	WT	WT	WT	WT
coadread_dfci_2016	coadread_dfci_2016_283	WT	WT	WT	WT	WT	WT	WT	WT	WT	WT	WT	WT	WT	WT	WT	WT	WT	WT	WT	WT	WT	WT	WT	WT	WT	WT	WT	WT	WT	WT	WT	WT	WT	WT	WT	WT	WT	WT	WT	WT	WT	WT	WT	WT	WT	WT	WT	WT
coadread_tcga	TCGA-F5-6464-01	NS	NS	NS	NS	NS	NS	NS	NS	NS	NS	NS	NS	NS	NS	NS	NS	NS	NS	NS	NS	NS	NS	NS	NS	NS	NS	NS	NS	NS	NS	NS	NS	NS	NS	NS	NS	NS	NS	NS	NS	NS	NS	NS	NS	NS	NS	NS	NS
coadread_tcga	TCGA-AG-4005-01	WT	WT	WT	WT	WT	R1970G	WT	WT	WT	WT	WT	WT	WT	WT	WT	WT	WT	WT	WT	WT	WT	WT	WT	WT	WT	WT	WT	WT	WT	WT	WT	WT	WT	WT	WT	WT	WT	WT	WT	WT	WT	I1599T	WT	WT	WT	WT	WT	WT
coadread_tcga	TCGA-AF-3913-01	WT	WT	WT	WT	WT	V1376F	WT	WT	WT	WT	WT	WT	WT	V1558L	WT	WT	WT	WT	WT	WT	WT	WT	WT	WT	WT	WT	WT	R3363H [germline]	WT	WT	WT	WT	WT	WT	WT	WT	WT	WT	WT	WT	WT	WT	WT	WT	WT	WT	WT	WT
coadread_tcga	TCGA-AG-3584-01	WT	WT	WT	WT	WT	WT	WT	WT	WT	WT	WT	WT	WT	WT	WT	WT	WT	WT	WT	WT	WT	WT	WT	WT	WT	WT	WT	WT	WT	WT	WT	WT	WT	WT	WT	WT	WT	WT	WT	WT	WT	WT	WT	WT	WT	WT	WT	WT
coadread_tcga	TCGA-EI-7002-01	NS	NS	NS	NS	NS	NS	NS	NS	NS	NS	NS	NS	NS	NS	NS	NS	NS	NS	NS	NS	NS	NS	NS	NS	NS	NS	NS	NS	NS	NS	NS	NS	NS	NS	NS	NS	NS	NS	NS	NS	NS	NS	NS	NS	NS	NS	NS	NS
coadread_tcga	TCGA-AF-2690-01	NS	NS	NS	NS	NS	NS	NS	NS	NS	NS	NS	NS	NS	NS	NS	NS	NS	NS	NS	NS	NS	NS	NS	NS	NS	NS	NS	NS	NS	NS	NS	NS	NS	NS	NS	NS	NS	NS	NS	NS	NS	NS	NS	NS	NS	NS	NS	NS
coadread_tcga	TCGA-EI-6510-01	NS	NS	NS	NS	NS	NS	NS	NS	NS	NS	NS	NS	NS	NS	NS	NS	NS	NS	NS	NS	NS	NS	NS	NS	NS	NS	NS	NS	NS	NS	NS	NS	NS	NS	NS	NS	NS	NS	NS	NS	NS	NS	NS	NS	NS	NS	NS	NS
coadread_tcga	TCGA-AG-A015-01	WT	WT	WT	WT	WT	WT	WT	WT	WT	WT	WT	WT	R1434S	WT	WT	WT	WT	WT	WT	WT	WT	WT	WT	WT	WT	WT	WT	WT	WT	WT	WT	WT	WT	WT	WT	WT	WT	WT	WT	WT	WT	WT	WT	WT	WT	WT	S2142C	WT
coadread_tcga	TCGA-G5-6572-01	NS	NS	NS	NS	NS	NS	NS	NS	NS	NS	NS	NS	NS	NS	NS	NS	NS	NS	NS	NS	NS	NS	NS	NS	NS	NS	NS	NS	NS	NS	NS	NS	NS	NS	NS	NS	NS	NS	NS	NS	NS	NS	NS	NS	NS	NS	NS	NS
coadread_tcga	TCGA-G5-6572-02	NS	NS	NS	NS	NS	NS	NS	NS	NS	NS	NS	NS	NS	NS	NS	NS	NS	NS	NS	NS	NS	NS	NS	NS	NS	NS	NS	NS	NS	NS	NS	NS	NS	NS	NS	NS	NS	NS	NS	NS	NS	NS	NS	NS	NS	NS	NS	NS
coadread_tcga	TCGA-EI-6883-01	NS	NS	NS	NS	NS	NS	NS	NS	NS	NS	NS	NS	NS	NS	NS	NS	NS	NS	NS	NS	NS	NS	NS	NS	NS	NS	NS	NS	NS	NS	NS	NS	NS	NS	NS	NS	NS	NS	NS	NS	NS	NS	NS	NS	NS	NS	NS	NS
coadread_tcga	TCGA-EF-5830-01	NS	NS	NS	NS	NS	NS	NS	NS	NS	NS	NS	NS	NS	NS	NS	NS	NS	NS	NS	NS	NS	NS	NS	NS	NS	NS	NS	NS	NS	NS	NS	NS	NS	NS	NS	NS	NS	NS	NS	NS	NS	NS	NS	NS	NS	NS	NS	NS
coadread_tcga	TCGA-DY-A0XA-01	NS	NS	NS	NS	NS	NS	NS	NS	NS	NS	NS	NS	NS	NS	NS	NS	NS	NS	NS	NS	NS	NS	NS	NS	NS	NS	NS	NS	NS	NS	NS	NS	NS	NS	NS	NS	NS	NS	NS	NS	NS	NS	NS	NS	NS	NS	NS	NS
coadread_tcga	TCGA-AG-3725-01	NS	NS	NS	NS	NS	NS	NS	NS	NS	NS	NS	NS	NS	NS	NS	NS	NS	NS	NS	NS	NS	NS	NS	NS	NS	NS	NS	NS	NS	NS	NS	NS	NS	NS	NS	NS	NS	NS	NS	NS	NS	NS	NS	NS	NS	NS	NS	NS
coadread_tcga	TCGA-CL-5918-01	NS	NS	NS	NS	NS	NS	NS	NS	NS	NS	NS	NS	NS	NS	NS	NS	NS	NS	NS	NS	NS	NS	NS	NS	NS	NS	NS	NS	NS	NS	NS	NS	NS	NS	NS	NS	NS	NS	NS	NS	NS	NS	NS	NS	NS	NS	NS	NS
coadread_tcga	TCGA-CI-6623-01	NS	NS	NS	NS	NS	NS	NS	NS	NS	NS	NS	NS	NS	NS	NS	NS	NS	NS	NS	NS	NS	NS	NS	NS	NS	NS	NS	NS	NS	NS	NS	NS	NS	NS	NS	NS	NS	NS	NS	NS	NS	NS	NS	NS	NS	NS	NS	NS
coadread_tcga	TCGA-AG-A008-01	WT	WT	WT	WT	WT	WT	WT	WT	WT	WT	WT	WT	WT	WT	WT	WT	WT	WT	WT	WT	WT	WT	WT	WT	WT	WT	WT	WT	WT	WT	WT	WT	WT	WT	WT	WT	WT	WT	WT	WT	WT	WT	WT	WT	WT	WT	WT	WT
coadread_tcga	TCGA-AG-A023-01	NS	NS	NS	NS	NS	NS	NS	NS	NS	NS	NS	NS	NS	NS	NS	NS	NS	NS	NS	NS	NS	NS	NS	NS	NS	NS	NS	NS	NS	NS	NS	NS	NS	NS	NS	NS	NS	NS	NS	NS	NS	NS	NS	NS	NS	NS	NS	NS
coadread_tcga	TCGA-AF-5654-01	NS	NS	NS	NS	NS	NS	NS	NS	NS	NS	NS	NS	NS	NS	NS	NS	NS	NS	NS	NS	NS	NS	NS	NS	NS	NS	NS	NS	NS	NS	NS	NS	NS	NS	NS	NS	NS	NS	NS	NS	NS	NS	NS	NS	NS	NS	NS	NS
coadread_tcga	TCGA-AG-A02X-01	WT	WT	WT	WT	WT	WT	WT	WT	WT	WT	WT	WT	WT	WT	WT	WT	WT	WT	WT	WT	WT	WT	WT	WT	WT	WT	WT	WT	WT	WT	WT	WT	WT	R1578Q	WT	WT	WT	WT	WT	WT	WT	WT	WT	WT	WT	WT	WT	WT
coadread_tcga	TCGA-AG-3594-01	WT	WT	WT	WT	WT	WT	WT	WT	WT	WT	WT	WT	WT	WT	WT	WT	WT	WT	WT	WT	WT	WT	WT	WT	WT	WT	WT	WT	WT	WT	WT	WT	WT	WT	WT	WT	WT	WT	WT	WT	WT	WT	WT	WT	WT	WT	WT	WT
coadread_tcga	TCGA-AG-3883-01	WT	WT	WT	WT	WT	WT	WT	WT	WT	WT	WT	WT	WT	WT	WT	WT	WT	WT	WT	WT	WT	WT	WT	WT	WT	WT	WT	WT	WT	WT	WT	WT	WT	WT	WT	WT	WT	WT	WT	WT	WT	WT	WT	WT	WT	WT	WT	WT
coadread_tcga	TCGA-AG-3609-01	WT	WT	WT	WT	WT	WT	WT	WT	WT	WT	WT	WT	WT	WT	WT	WT	WT	WT	WT	WT	WT	WT	WT	WT	V1762A	WT	WT	WT	WT	WT	WT	WT	WT	WT	WT	WT	WT	WT	WT	WT	WT	WT	WT	WT	WT	WT	WT	WT
coadread_tcga	TCGA-EI-6917-01	NS	NS	NS	NS	NS	NS	NS	NS	NS	NS	NS	NS	NS	NS	NS	NS	NS	NS	NS	NS	NS	NS	NS	NS	NS	NS	NS	NS	NS	NS	NS	NS	NS	NS	NS	NS	NS	NS	NS	NS	NS	NS	NS	NS	NS	NS	NS	NS
coadread_mskcc	EV-044-P	NS	NS	NS	NS	NS	NS	NS	NS	NS	NS	NS	NS	NS	NS	NS	NS	NS	NS	NS	NS	NS	NS	NS	NS	NS	NS	NS	NS	NS	NS	NS	NS	NS	NS	NS	NS	NS	NS	NS	NS	NS	NS	NS	NS	NS	NS	NS	NS
coadread_tcga	TCGA-AG-A02G-01	WT	WT	WT	WT	WT	WT	WT	WT	WT	S174L	WT	WT	WT	WT	WT	WT	WT	WT	WT	WT	WT	WT	WT	WT	WT	WT	WT	WT	WT	WT	WT	WT	WT	WT	WT	WT	WT	WT	WT	WT	WT	WT	WT	WT	WT	WT	WT	WT
coadread_tcga	TCGA-F5-6702-01	NS	NS	NS	NS	NS	NS	NS	NS	NS	NS	NS	NS	NS	NS	NS	NS	NS	NS	NS	NS	NS	NS	NS	NS	NS	NS	NS	NS	NS	NS	NS	NS	NS	NS	NS	NS	NS	NS	NS	NS	NS	NS	NS	NS	NS	NS	NS	NS
coadread_tcga	TCGA-AH-6549-01	NS	NS	NS	NS	NS	NS	NS	NS	NS	NS	NS	NS	NS	NS	NS	NS	NS	NS	NS	NS	NS	NS	NS	NS	NS	NS	NS	NS	NS	NS	NS	NS	NS	NS	NS	NS	NS	NS	NS	NS	NS	NS	NS	NS	NS	NS	NS	NS
coadread_tcga	TCGA-AH-6897-01	NS	NS	NS	NS	NS	NS	NS	NS	NS	NS	NS	NS	NS	NS	NS	NS	NS	NS	NS	NS	NS	NS	NS	NS	NS	NS	NS	NS	NS	NS	NS	NS	NS	NS	NS	NS	NS	NS	NS	NS	NS	NS	NS	NS	NS	NS	NS	NS
coadread_tcga	TCGA-EI-6507-01	NS	NS	NS	NS	NS	NS	NS	NS	NS	NS	NS	NS	NS	NS	NS	NS	NS	NS	NS	NS	NS	NS	NS	NS	NS	NS	NS	NS	NS	NS	NS	NS	NS	NS	NS	NS	NS	NS	NS	NS	NS	NS	NS	NS	NS	NS	NS	NS
coadread_tcga	TCGA-DC-6682-01	NS	NS	NS	NS	NS	NS	NS	NS	NS	NS	NS	NS	NS	NS	NS	NS	NS	NS	NS	NS	NS	NS	NS	NS	NS	NS	NS	NS	NS	NS	NS	NS	NS	NS	NS	NS	NS	NS	NS	NS	NS	NS	NS	NS	NS	NS	NS	NS
coadread_tcga	TCGA-AG-3602-01	WT	WT	WT	WT	WT	WT	WT	WT	WT	WT	WT	WT	WT	WT	WT	WT	WT	WT	WT	WT	WT	WT	WT	WT	WT	WT	WT	WT	WT	WT	WT	WT	WT	WT	WT	WT	WT	WT	WT	WT	WT	WT	WT	WT	WT	WT	WT	WT
coadread_tcga	TCGA-G5-6233-01	NS	NS	NS	NS	NS	NS	NS	NS	NS	NS	NS	NS	NS	NS	NS	NS	NS	NS	NS	NS	NS	NS	NS	NS	NS	NS	NS	NS	NS	NS	NS	NS	NS	NS	NS	NS	NS	NS	NS	NS	NS	NS	NS	NS	NS	NS	NS	NS
coadread_tcga	TCGA-BM-6198-01	NS	NS	NS	NS	NS	NS	NS	NS	NS	NS	NS	NS	NS	NS	NS	NS	NS	NS	NS	NS	NS	NS	NS	NS	NS	NS	NS	NS	NS	NS	NS	NS	NS	NS	NS	NS	NS	NS	NS	NS	NS	NS	NS	NS	NS	NS	NS	NS
coadread_tcga	TCGA-AG-3575-01	WT	WT	WT	WT	WT	WT	WT	WT	WT	WT	WT	WT	WT	WT	WT	WT	WT	WT	WT	WT	WT	WT	WT	WT	WT	WT	WT	WT	WT	WT	WT	WT	WT	WT	WT	WT	WT	WT	WT	WT	WT	WT	WT	WT	WT	WT	WT	WT
coadread_tcga	TCGA-F5-6465-01	NS	NS	NS	NS	NS	NS	NS	NS	NS	NS	NS	NS	NS	NS	NS	NS	NS	NS	NS	NS	NS	NS	NS	NS	NS	NS	NS	NS	NS	NS	NS	NS	NS	NS	NS	NS	NS	NS	NS	NS	NS	NS	NS	NS	NS	NS	NS	NS
coadread_tcga	TCGA-AG-3583-01	WT	WT	WT	WT	WT	WT	WT	WT	WT	WT	WT	WT	WT	WT	WT	WT	WT	WT	WT	WT	WT	WT	WT	WT	WT	WT	WT	WT	WT	WT	WT	WT	WT	WT	WT	WT	WT	WT	WT	WT	WT	WT	WT	WT	WT	WT	WT	WT
coadread_tcga	TCGA-AG-3592-01	NS	NS	NS	NS	NS	NS	NS	NS	NS	NS	NS	NS	NS	NS	NS	NS	NS	NS	NS	NS	NS	NS	NS	NS	NS	NS	NS	NS	NS	NS	NS	NS	NS	NS	NS	NS	NS	NS	NS	NS	NS	NS	NS	NS	NS	NS	NS	NS
coadread_tcga	TCGA-G5-6641-01	NS	NS	NS	NS	NS	NS	NS	NS	NS	NS	NS	NS	NS	NS	NS	NS	NS	NS	NS	NS	NS	NS	NS	NS	NS	NS	NS	NS	NS	NS	NS	NS	NS	NS	NS	NS	NS	NS	NS	NS	NS	NS	NS	NS	NS	NS	NS	NS
coadread_tcga	TCGA-AG-3893-01	WT	WT	WT	WT	WT	WT	WT	WT	WT	WT	WT	WT	WT	WT	WT	WT	WT	WT	WT	WT	WT	WT	WT	A349S	WT	WT	WT	WT	WT	WT	WT	WT	WT	WT	WT	WT	WT	WT	WT	WT	WT	WT	WT	WT	WT	WT	WT	WT
coadread_tcga	TCGA-AG-A01J-01	NS	NS	NS	NS	NS	NS	NS	NS	NS	NS	NS	NS	NS	NS	NS	NS	NS	NS	NS	NS	NS	NS	NS	NS	NS	NS	NS	NS	NS	NS	NS	NS	NS	NS	NS	NS	NS	NS	NS	NS	NS	NS	NS	NS	NS	NS	NS	NS
coadread_tcga	TCGA-EI-6508-01	NS	NS	NS	NS	NS	NS	NS	NS	NS	NS	NS	NS	NS	NS	NS	NS	NS	NS	NS	NS	NS	NS	NS	NS	NS	NS	NS	NS	NS	NS	NS	NS	NS	NS	NS	NS	NS	NS	NS	NS	NS	NS	NS	NS	NS	NS	NS	NS
coadread_tcga	TCGA-AG-3728-01	NS	NS	NS	NS	NS	NS	NS	NS	NS	NS	NS	NS	NS	NS	NS	NS	NS	NS	NS	NS	NS	NS	NS	NS	NS	NS	NS	NS	NS	NS	NS	NS	NS	NS	NS	NS	NS	NS	NS	NS	NS	NS	NS	NS	NS	NS	NS	NS
coadread_tcga	TCGA-CI-6619-01	NS	NS	NS	NS	NS	NS	NS	NS	NS	NS	NS	NS	NS	NS	NS	NS	NS	NS	NS	NS	NS	NS	NS	NS	NS	NS	NS	NS	NS	NS	NS	NS	NS	NS	NS	NS	NS	NS	NS	NS	NS	NS	NS	NS	NS	NS	NS	NS
coadread_tcga	TCGA-EI-6881-01	NS	NS	NS	NS	NS	NS	NS	NS	NS	NS	NS	NS	NS	NS	NS	NS	NS	NS	NS	NS	NS	NS	NS	NS	NS	NS	NS	NS	NS	NS	NS	NS	NS	NS	NS	NS	NS	NS	NS	NS	NS	NS	NS	NS	NS	NS	NS	NS
coadread_tcga	TCGA-AG-A014-01	WT	WT	WT	WT	WT	WT	WT	WT	WT	WT	WT	WT	WT	WT	WT	WT	WT	WT	WT	WT	WT	WT	WT	WT	WT	WT	WT	WT	WT	WT	WT	WT	WT	WT	WT	WT	WT	WT	R95H	WT	WT	WT	WT	WT	WT	WT	WT	R5013C
coadread_tcga	TCGA-AG-3586-01	WT	WT	WT	WT	WT	WT	WT	WT	WT	WT	WT	R1515C	WT	WT	WT	WT	WT	WT	WT	WT	WT	WT	WT	WT	WT	WT	WT	WT	WT	WT	WT	WT	WT	WT	WT	WT	WT	WT	WT	WT	WT	WT	WT	WT	WT	WT	WT	WT
coadread_tcga	TCGA-AG-A00Y-01	WT	WT	WT	WT	WT	WT	WT	WT	WT	WT	WT	WT	WT	WT	WT	WT	WT	WT	WT	WT	WT	WT	WT	WT	WT	WT	WT	WT	WT	WT	WT	WT	WT	WT	WT	WT	WT	S653Yfs*5	WT	WT	WT	WT	WT	WT	WT	P2719Hfs*34	WT	WT
coadread_tcga	TCGA-AG-3599-01	WT	WT	WT	WT	WT	WT	WT	WT	WT	WT	WT	WT	WT	WT	WT	WT	WT	WT	WT	WT	WT	WT	WT	WT	WT	WT	WT	WT	WT	WT	WT	WT	WT	WT	WT	WT	WT	WT	WT	WT	WT	WT	WT	WT	WT	WT	WT	WT
coadread_tcga	TCGA-AF-6136-01	NS	NS	NS	NS	NS	NS	NS	NS	NS	NS	NS	NS	NS	NS	NS	NS	NS	NS	NS	NS	NS	NS	NS	NS	NS	NS	NS	NS	NS	NS	NS	NS	NS	NS	NS	NS	NS	NS	NS	NS	NS	NS	NS	NS	NS	NS	NS	NS
coadread_tcga	TCGA-EF-5831-01	NS	NS	NS	NS	NS	NS	NS	NS	NS	NS	NS	NS	NS	NS	NS	NS	NS	NS	NS	NS	NS	NS	NS	NS	NS	NS	NS	NS	NS	NS	NS	NS	NS	NS	NS	NS	NS	NS	NS	NS	NS	NS	NS	NS	NS	NS	NS	NS
coadread_tcga	TCGA-DY-A1DD-01	NS	NS	NS	NS	NS	NS	NS	NS	NS	NS	NS	NS	NS	NS	NS	NS	NS	NS	NS	NS	NS	NS	NS	NS	NS	NS	NS	NS	NS	NS	NS	NS	NS	NS	NS	NS	NS	NS	NS	NS	NS	NS	NS	NS	NS	NS	NS	NS
coadread_tcga	TCGA-AF-3912-01	NS	NS	NS	NS	NS	NS	NS	NS	NS	NS	NS	NS	NS	NS	NS	NS	NS	NS	NS	NS	NS	NS	NS	NS	NS	NS	NS	NS	NS	NS	NS	NS	NS	NS	NS	NS	NS	NS	NS	NS	NS	NS	NS	NS	NS	NS	NS	NS
coadread_tcga	TCGA-AG-3906-01	NS	NS	NS	NS	NS	NS	NS	NS	NS	NS	NS	NS	NS	NS	NS	NS	NS	NS	NS	NS	NS	NS	NS	NS	NS	NS	NS	NS	NS	NS	NS	NS	NS	NS	NS	NS	NS	NS	NS	NS	NS	NS	NS	NS	NS	NS	NS	NS
coadread_tcga	TCGA-AG-4009-01	NS	NS	NS	NS	NS	NS	NS	NS	NS	NS	NS	NS	NS	NS	NS	NS	NS	NS	NS	NS	NS	NS	NS	NS	NS	NS	NS	NS	NS	NS	NS	NS	NS	NS	NS	NS	NS	NS	NS	NS	NS	NS	NS	NS	NS	NS	NS	NS
coadread_tcga	TCGA-G4-6317-02	NS	NS	NS	NS	NS	NS	NS	NS	NS	NS	NS	NS	NS	NS	NS	NS	NS	NS	NS	NS	NS	NS	NS	NS	NS	NS	NS	NS	NS	NS	NS	NS	NS	NS	NS	NS	NS	NS	NS	NS	NS	NS	NS	NS	NS	NS	NS	NS
coadread_tcga	TCGA-NH-A8F7-06	NS	NS	NS	NS	NS	NS	NS	NS	NS	NS	NS	NS	NS	NS	NS	NS	NS	NS	NS	NS	NS	NS	NS	NS	NS	NS	NS	NS	NS	NS	NS	NS	NS	NS	NS	NS	NS	NS	NS	NS	NS	NS	NS	NS	NS	NS	NS	NS
coadread_tcga	TCGA-NH-A6GC-06	NS	NS	NS	NS	NS	NS	NS	NS	NS	NS	NS	NS	NS	NS	NS	NS	NS	NS	NS	NS	NS	NS	NS	NS	NS	NS	NS	NS	NS	NS	NS	NS	NS	NS	NS	NS	NS	NS	NS	NS	NS	NS	NS	NS	NS	NS	NS	NS
coadread_mskcc	EV-001-M	NS	NS	NS	NS	NS	NS	NS	NS	NS	NS	NS	NS	NS	NS	NS	NS	NS	NS	NS	NS	NS	NS	NS	NS	NS	NS	NS	NS	NS	NS	NS	NS	NS	NS	NS	NS	NS	NS	NS	NS	NS	NS	NS	NS	NS	NS	NS	NS
coadread_mskcc	EV-001-P	NS	NS	NS	NS	NS	NS	NS	NS	NS	NS	NS	NS	NS	NS	NS	NS	NS	NS	NS	NS	NS	NS	NS	NS	NS	NS	NS	NS	NS	NS	NS	NS	NS	NS	NS	NS	NS	NS	NS	NS	NS	NS	NS	NS	NS	NS	NS	NS
coadread_mskcc	EV-002-M	NS	NS	NS	NS	NS	NS	NS	NS	NS	NS	NS	NS	NS	NS	NS	NS	NS	NS	NS	NS	NS	NS	NS	NS	NS	NS	NS	NS	NS	NS	NS	NS	NS	NS	NS	NS	NS	NS	NS	NS	NS	NS	NS	NS	NS	NS	NS	NS
coadread_mskcc	EV-002-P	NS	NS	NS	NS	NS	NS	NS	NS	NS	NS	NS	NS	NS	NS	NS	NS	NS	NS	NS	NS	NS	NS	NS	NS	NS	NS	NS	NS	NS	NS	NS	NS	NS	NS	NS	NS	NS	NS	NS	NS	NS	NS	NS	NS	NS	NS	NS	NS
coadread_mskcc	EV-003-M	NS	NS	NS	NS	NS	NS	NS	NS	NS	NS	NS	NS	NS	NS	NS	NS	NS	NS	NS	NS	NS	NS	NS	NS	NS	NS	NS	NS	NS	NS	NS	NS	NS	NS	NS	NS	NS	NS	NS	NS	NS	NS	NS	NS	NS	NS	NS	NS
coadread_mskcc	EV-003-P	NS	NS	NS	NS	NS	NS	NS	NS	NS	NS	NS	NS	NS	NS	NS	NS	NS	NS	NS	NS	NS	NS	NS	NS	NS	NS	NS	NS	NS	NS	NS	NS	NS	NS	NS	NS	NS	NS	NS	NS	NS	NS	NS	NS	NS	NS	NS	NS
coadread_mskcc	EV-004-M	NS	NS	NS	NS	NS	NS	NS	NS	NS	NS	NS	NS	NS	NS	NS	NS	NS	NS	NS	NS	NS	NS	NS	NS	NS	NS	NS	NS	NS	NS	NS	NS	NS	NS	NS	NS	NS	NS	NS	NS	NS	NS	NS	NS	NS	NS	NS	NS
coadread_mskcc	EV-004-P	NS	NS	NS	NS	NS	NS	NS	NS	NS	NS	NS	NS	NS	NS	NS	NS	NS	NS	NS	NS	NS	NS	NS	NS	NS	NS	NS	NS	NS	NS	NS	NS	NS	NS	NS	NS	NS	NS	NS	NS	NS	NS	NS	NS	NS	NS	NS	NS
coadread_mskcc	EV-005-M	NS	NS	NS	NS	NS	NS	NS	NS	NS	NS	NS	NS	NS	NS	NS	NS	NS	NS	NS	NS	NS	NS	NS	NS	NS	NS	NS	NS	NS	NS	NS	NS	NS	NS	NS	NS	NS	NS	NS	NS	NS	NS	NS	NS	NS	NS	NS	NS
coadread_mskcc	EV-005-P	NS	NS	NS	NS	NS	NS	NS	NS	NS	NS	NS	NS	NS	NS	NS	NS	NS	NS	NS	NS	NS	NS	NS	NS	NS	NS	NS	NS	NS	NS	NS	NS	NS	NS	NS	NS	NS	NS	NS	NS	NS	NS	NS	NS	NS	NS	NS	NS
coadread_mskcc	EV-006-M	NS	NS	NS	NS	NS	NS	NS	NS	NS	NS	NS	NS	NS	NS	NS	NS	NS	NS	NS	NS	NS	NS	NS	NS	NS	NS	NS	NS	NS	NS	NS	NS	NS	NS	NS	NS	NS	NS	NS	NS	NS	NS	NS	NS	NS	NS	NS	NS
coadread_mskcc	EV-006-P	NS	NS	NS	NS	NS	NS	NS	NS	NS	NS	NS	NS	NS	NS	NS	NS	NS	NS	NS	NS	NS	NS	NS	NS	NS	NS	NS	NS	NS	NS	NS	NS	NS	NS	NS	NS	NS	NS	NS	NS	NS	NS	NS	NS	NS	NS	NS	NS
coadread_mskcc	EV-007-M	NS	NS	NS	NS	NS	NS	NS	NS	NS	NS	NS	NS	NS	NS	NS	NS	NS	NS	NS	NS	NS	NS	NS	NS	NS	NS	NS	NS	NS	NS	NS	NS	NS	NS	NS	NS	NS	NS	NS	NS	NS	NS	NS	NS	NS	NS	NS	NS
coadread_mskcc	EV-007-P	NS	NS	NS	NS	NS	NS	NS	NS	NS	NS	NS	NS	NS	NS	NS	NS	NS	NS	NS	NS	NS	NS	NS	NS	NS	NS	NS	NS	NS	NS	NS	NS	NS	NS	NS	NS	NS	NS	NS	NS	NS	NS	NS	NS	NS	NS	NS	NS
coadread_mskcc	EV-008-M	NS	NS	NS	NS	NS	NS	NS	NS	NS	NS	NS	NS	NS	NS	NS	NS	NS	NS	NS	NS	NS	NS	NS	NS	NS	NS	NS	NS	NS	NS	NS	NS	NS	NS	NS	NS	NS	NS	NS	NS	NS	NS	NS	NS	NS	NS	NS	NS
coadread_mskcc	EV-008-P	NS	NS	NS	NS	NS	NS	NS	NS	NS	NS	NS	NS	NS	NS	NS	NS	NS	NS	NS	NS	NS	NS	NS	NS	NS	NS	NS	NS	NS	NS	NS	NS	NS	NS	NS	NS	NS	NS	NS	NS	NS	NS	NS	NS	NS	NS	NS	NS
coadread_mskcc	EV-009-M	NS	NS	NS	NS	NS	NS	NS	NS	NS	NS	NS	NS	NS	NS	NS	NS	NS	NS	NS	NS	NS	NS	NS	NS	NS	NS	NS	NS	NS	NS	NS	NS	NS	NS	NS	NS	NS	NS	NS	NS	NS	NS	NS	NS	NS	NS	NS	NS
coadread_mskcc	EV-009-P	NS	NS	NS	NS	NS	NS	NS	NS	NS	NS	NS	NS	NS	NS	NS	NS	NS	NS	NS	NS	NS	NS	NS	NS	NS	NS	NS	NS	NS	NS	NS	NS	NS	NS	NS	NS	NS	NS	NS	NS	NS	NS	NS	NS	NS	NS	NS	NS
coadread_mskcc	EV-010-M	NS	NS	NS	NS	NS	NS	NS	NS	NS	NS	NS	NS	NS	NS	NS	NS	NS	NS	NS	NS	NS	NS	NS	NS	NS	NS	NS	NS	NS	NS	NS	NS	NS	NS	NS	NS	NS	NS	NS	NS	NS	NS	NS	NS	NS	NS	NS	NS
coadread_mskcc	EV-010-P	NS	NS	NS	NS	NS	NS	NS	NS	NS	NS	NS	NS	NS	NS	NS	NS	NS	NS	NS	NS	NS	NS	NS	NS	NS	NS	NS	NS	NS	NS	NS	NS	NS	NS	NS	NS	NS	NS	NS	NS	NS	NS	NS	NS	NS	NS	NS	NS
coadread_mskcc	EV-011-M	NS	NS	NS	NS	NS	NS	NS	NS	NS	NS	NS	NS	NS	NS	NS	NS	NS	NS	NS	NS	NS	NS	NS	NS	NS	NS	NS	NS	NS	NS	NS	NS	NS	NS	NS	NS	NS	NS	NS	NS	NS	NS	NS	NS	NS	NS	NS	NS
coadread_mskcc	EV-011-P	NS	NS	NS	NS	NS	NS	NS	NS	NS	NS	NS	NS	NS	NS	NS	NS	NS	NS	NS	NS	NS	NS	NS	NS	NS	NS	NS	NS	NS	NS	NS	NS	NS	NS	NS	NS	NS	NS	NS	NS	NS	NS	NS	NS	NS	NS	NS	NS
coadread_mskcc	EV-012-M	NS	NS	NS	NS	NS	NS	NS	NS	NS	NS	NS	NS	NS	NS	NS	NS	NS	NS	NS	NS	NS	NS	NS	NS	NS	NS	NS	NS	NS	NS	NS	NS	NS	NS	NS	NS	NS	NS	NS	NS	NS	NS	NS	NS	NS	NS	NS	NS
coadread_mskcc	EV-012-P	NS	NS	NS	NS	NS	NS	NS	NS	NS	NS	NS	NS	NS	NS	NS	NS	NS	NS	NS	NS	NS	NS	NS	NS	NS	NS	NS	NS	NS	NS	NS	NS	NS	NS	NS	NS	NS	NS	NS	NS	NS	NS	NS	NS	NS	NS	NS	NS
coadread_mskcc	EV-013-M	NS	NS	NS	NS	NS	NS	NS	NS	NS	NS	NS	NS	NS	NS	NS	NS	NS	NS	NS	NS	NS	NS	NS	NS	NS	NS	NS	NS	NS	NS	NS	NS	NS	NS	NS	NS	NS	NS	NS	NS	NS	NS	NS	NS	NS	NS	NS	NS
coadread_mskcc	EV-013-P	NS	NS	NS	NS	NS	NS	NS	NS	NS	NS	NS	NS	NS	NS	NS	NS	NS	NS	NS	NS	NS	NS	NS	NS	NS	NS	NS	NS	NS	NS	NS	NS	NS	NS	NS	NS	NS	NS	NS	NS	NS	NS	NS	NS	NS	NS	NS	NS
coadread_mskcc	EV-014-M	NS	NS	NS	NS	NS	NS	NS	NS	NS	NS	NS	NS	NS	NS	NS	NS	NS	NS	NS	NS	NS	NS	NS	NS	NS	NS	NS	NS	NS	NS	NS	NS	NS	NS	NS	NS	NS	NS	NS	NS	NS	NS	NS	NS	NS	NS	NS	NS
coadread_mskcc	EV-014-P	NS	NS	NS	NS	NS	NS	NS	NS	NS	NS	NS	NS	NS	NS	NS	NS	NS	NS	NS	NS	NS	NS	NS	NS	NS	NS	NS	NS	NS	NS	NS	NS	NS	NS	NS	NS	NS	NS	NS	NS	NS	NS	NS	NS	NS	NS	NS	NS
coadread_mskcc	EV-015-M	NS	NS	NS	NS	NS	NS	NS	NS	NS	NS	NS	NS	NS	NS	NS	NS	NS	NS	NS	NS	NS	NS	NS	NS	NS	NS	NS	NS	NS	NS	NS	NS	NS	NS	NS	NS	NS	NS	NS	NS	NS	NS	NS	NS	NS	NS	NS	NS
coadread_mskcc	EV-015-P	NS	NS	NS	NS	NS	NS	NS	NS	NS	NS	NS	NS	NS	NS	NS	NS	NS	NS	NS	NS	NS	NS	NS	NS	NS	NS	NS	NS	NS	NS	NS	NS	NS	NS	NS	NS	NS	NS	NS	NS	NS	NS	NS	NS	NS	NS	NS	NS
coadread_mskcc	EV-016-M	NS	NS	NS	NS	NS	NS	NS	NS	NS	NS	NS	NS	NS	NS	NS	NS	NS	NS	NS	NS	NS	NS	NS	NS	NS	NS	NS	NS	NS	NS	NS	NS	NS	NS	NS	NS	NS	NS	NS	NS	NS	NS	NS	NS	NS	NS	NS	NS
coadread_mskcc	EV-016-P	NS	NS	NS	NS	NS	NS	NS	NS	NS	NS	NS	NS	NS	NS	NS	NS	NS	NS	NS	NS	NS	NS	NS	NS	NS	NS	NS	NS	NS	NS	NS	NS	NS	NS	NS	NS	NS	NS	NS	NS	NS	NS	NS	NS	NS	NS	NS	NS
coadread_mskcc	EV-017-M	NS	NS	NS	NS	NS	NS	NS	NS	NS	NS	NS	NS	NS	NS	NS	NS	NS	NS	NS	NS	NS	NS	NS	NS	NS	NS	NS	NS	NS	NS	NS	NS	NS	NS	NS	NS	NS	NS	NS	NS	NS	NS	NS	NS	NS	NS	NS	NS
coadread_mskcc	EV-017-P	NS	NS	NS	NS	NS	NS	NS	NS	NS	NS	NS	NS	NS	NS	NS	NS	NS	NS	NS	NS	NS	NS	NS	NS	NS	NS	NS	NS	NS	NS	NS	NS	NS	NS	NS	NS	NS	NS	NS	NS	NS	NS	NS	NS	NS	NS	NS	NS
coadread_mskcc	EV-018-M	NS	NS	NS	NS	NS	NS	NS	NS	NS	NS	NS	NS	NS	NS	NS	NS	NS	NS	NS	NS	NS	NS	NS	NS	NS	NS	NS	NS	NS	NS	NS	NS	NS	NS	NS	NS	NS	NS	NS	NS	NS	NS	NS	NS	NS	NS	NS	NS
coadread_mskcc	EV-018-P	NS	NS	NS	NS	NS	NS	NS	NS	NS	NS	NS	NS	NS	NS	NS	NS	NS	NS	NS	NS	NS	NS	NS	NS	NS	NS	NS	NS	NS	NS	NS	NS	NS	NS	NS	NS	NS	NS	NS	NS	NS	NS	NS	NS	NS	NS	NS	NS
coadread_mskcc	EV-019-M	NS	NS	NS	NS	NS	NS	NS	NS	NS	NS	NS	NS	NS	NS	NS	NS	NS	NS	NS	NS	NS	NS	NS	NS	NS	NS	NS	NS	NS	NS	NS	NS	NS	NS	NS	NS	NS	NS	NS	NS	NS	NS	NS	NS	NS	NS	NS	NS
coadread_mskcc	EV-019-P	NS	NS	NS	NS	NS	NS	NS	NS	NS	NS	NS	NS	NS	NS	NS	NS	NS	NS	NS	NS	NS	NS	NS	NS	NS	NS	NS	NS	NS	NS	NS	NS	NS	NS	NS	NS	NS	NS	NS	NS	NS	NS	NS	NS	NS	NS	NS	NS
coadread_mskcc	EV-020-M	NS	NS	NS	NS	NS	NS	NS	NS	NS	NS	NS	NS	NS	NS	NS	NS	NS	NS	NS	NS	NS	NS	NS	NS	NS	NS	NS	NS	NS	NS	NS	NS	NS	NS	NS	NS	NS	NS	NS	NS	NS	NS	NS	NS	NS	NS	NS	NS
coadread_mskcc	EV-020-P	NS	NS	NS	NS	NS	NS	NS	NS	NS	NS	NS	NS	NS	NS	NS	NS	NS	NS	NS	NS	NS	NS	NS	NS	NS	NS	NS	NS	NS	NS	NS	NS	NS	NS	NS	NS	NS	NS	NS	NS	NS	NS	NS	NS	NS	NS	NS	NS
coadread_mskcc	EV-021-M	NS	NS	NS	NS	NS	NS	NS	NS	NS	NS	NS	NS	NS	NS	NS	NS	NS	NS	NS	NS	NS	NS	NS	NS	NS	NS	NS	NS	NS	NS	NS	NS	NS	NS	NS	NS	NS	NS	NS	NS	NS	NS	NS	NS	NS	NS	NS	NS
coadread_mskcc	EV-021-P	NS	NS	NS	NS	NS	NS	NS	NS	NS	NS	NS	NS	NS	NS	NS	NS	NS	NS	NS	NS	NS	NS	NS	NS	NS	NS	NS	NS	NS	NS	NS	NS	NS	NS	NS	NS	NS	NS	NS	NS	NS	NS	NS	NS	NS	NS	NS	NS
coadread_mskcc	EV-022-M	NS	NS	NS	NS	NS	NS	NS	NS	NS	NS	NS	NS	NS	NS	NS	NS	NS	NS	NS	NS	NS	NS	NS	NS	NS	NS	NS	NS	NS	NS	NS	NS	NS	NS	NS	NS	NS	NS	NS	NS	NS	NS	NS	NS	NS	NS	NS	NS
coadread_mskcc	EV-022-P	NS	NS	NS	NS	NS	NS	NS	NS	NS	NS	NS	NS	NS	NS	NS	NS	NS	NS	NS	NS	NS	NS	NS	NS	NS	NS	NS	NS	NS	NS	NS	NS	NS	NS	NS	NS	NS	NS	NS	NS	NS	NS	NS	NS	NS	NS	NS	NS
coadread_mskcc	EV-023-M	NS	NS	NS	NS	NS	NS	NS	NS	NS	NS	NS	NS	NS	NS	NS	NS	NS	NS	NS	NS	NS	NS	NS	NS	NS	NS	NS	NS	NS	NS	NS	NS	NS	NS	NS	NS	NS	NS	NS	NS	NS	NS	NS	NS	NS	NS	NS	NS
coadread_mskcc	EV-023-P	NS	NS	NS	NS	NS	NS	NS	NS	NS	NS	NS	NS	NS	NS	NS	NS	NS	NS	NS	NS	NS	NS	NS	NS	NS	NS	NS	NS	NS	NS	NS	NS	NS	NS	NS	NS	NS	NS	NS	NS	NS	NS	NS	NS	NS	NS	NS	NS
coadread_mskcc	EV-026-M	NS	NS	NS	NS	NS	NS	NS	NS	NS	NS	NS	NS	NS	NS	NS	NS	NS	NS	NS	NS	NS	NS	NS	NS	NS	NS	NS	NS	NS	NS	NS	NS	NS	NS	NS	NS	NS	NS	NS	NS	NS	NS	NS	NS	NS	NS	NS	NS
coadread_mskcc	EV-026-P	NS	NS	NS	NS	NS	NS	NS	NS	NS	NS	NS	NS	NS	NS	NS	NS	NS	NS	NS	NS	NS	NS	NS	NS	NS	NS	NS	NS	NS	NS	NS	NS	NS	NS	NS	NS	NS	NS	NS	NS	NS	NS	NS	NS	NS	NS	NS	NS
coadread_mskcc	EV-027-M	NS	NS	NS	NS	NS	NS	NS	NS	NS	NS	NS	NS	NS	NS	NS	NS	NS	NS	NS	NS	NS	NS	NS	NS	NS	NS	NS	NS	NS	NS	NS	NS	NS	NS	NS	NS	NS	NS	NS	NS	NS	NS	NS	NS	NS	NS	NS	NS
coadread_mskcc	EV-027-P	NS	NS	NS	NS	NS	NS	NS	NS	NS	NS	NS	NS	NS	NS	NS	NS	NS	NS	NS	NS	NS	NS	NS	NS	NS	NS	NS	NS	NS	NS	NS	NS	NS	NS	NS	NS	NS	NS	NS	NS	NS	NS	NS	NS	NS	NS	NS	NS
coadread_mskcc	EV-028-M	NS	NS	NS	NS	NS	NS	NS	NS	NS	NS	NS	NS	NS	NS	NS	NS	NS	NS	NS	NS	NS	NS	NS	NS	NS	NS	NS	NS	NS	NS	NS	NS	NS	NS	NS	NS	NS	NS	NS	NS	NS	NS	NS	NS	NS	NS	NS	NS
coadread_mskcc	EV-028-P	NS	NS	NS	NS	NS	NS	NS	NS	NS	NS	NS	NS	NS	NS	NS	NS	NS	NS	NS	NS	NS	NS	NS	NS	NS	NS	NS	NS	NS	NS	NS	NS	NS	NS	NS	NS	NS	NS	NS	NS	NS	NS	NS	NS	NS	NS	NS	NS
coadread_mskcc	EV-029-M	NS	NS	NS	NS	NS	NS	NS	NS	NS	NS	NS	NS	NS	NS	NS	NS	NS	NS	NS	NS	NS	NS	NS	NS	NS	NS	NS	NS	NS	NS	NS	NS	NS	NS	NS	NS	NS	NS	NS	NS	NS	NS	NS	NS	NS	NS	NS	NS
coadread_mskcc	EV-029-P	NS	NS	NS	NS	NS	NS	NS	NS	NS	NS	NS	NS	NS	NS	NS	NS	NS	NS	NS	NS	NS	NS	NS	NS	NS	NS	NS	NS	NS	NS	NS	NS	NS	NS	NS	NS	NS	NS	NS	NS	NS	NS	NS	NS	NS	NS	NS	NS
coadread_mskcc	EV-030-M	NS	NS	NS	NS	NS	NS	NS	NS	NS	NS	NS	NS	NS	NS	NS	NS	NS	NS	NS	NS	NS	NS	NS	NS	NS	NS	NS	NS	NS	NS	NS	NS	NS	NS	NS	NS	NS	NS	NS	NS	NS	NS	NS	NS	NS	NS	NS	NS
coadread_mskcc	EV-030-P	NS	NS	NS	NS	NS	NS	NS	NS	NS	NS	NS	NS	NS	NS	NS	NS	NS	NS	NS	NS	NS	NS	NS	NS	NS	NS	NS	NS	NS	NS	NS	NS	NS	NS	NS	NS	NS	NS	NS	NS	NS	NS	NS	NS	NS	NS	NS	NS
coadread_mskcc	EV-032-M	NS	NS	NS	NS	NS	NS	NS	NS	NS	NS	NS	NS	NS	NS	NS	NS	NS	NS	NS	NS	NS	NS	NS	NS	NS	NS	NS	NS	NS	NS	NS	NS	NS	NS	NS	NS	NS	NS	NS	NS	NS	NS	NS	NS	NS	NS	NS	NS
coadread_mskcc	EV-032-P	NS	NS	NS	NS	NS	NS	NS	NS	NS	NS	NS	NS	NS	NS	NS	NS	NS	NS	NS	NS	NS	NS	NS	NS	NS	NS	NS	NS	NS	NS	NS	NS	NS	NS	NS	NS	NS	NS	NS	NS	NS	NS	NS	NS	NS	NS	NS	NS
coadread_mskcc	EV-033-M	NS	NS	NS	NS	NS	NS	NS	NS	NS	NS	NS	NS	NS	NS	NS	NS	NS	NS	NS	NS	NS	NS	NS	NS	NS	NS	NS	NS	NS	NS	NS	NS	NS	NS	NS	NS	NS	NS	NS	NS	NS	NS	NS	NS	NS	NS	NS	NS
coadread_mskcc	EV-033-P	NS	NS	NS	NS	NS	NS	NS	NS	NS	NS	NS	NS	NS	NS	NS	NS	NS	NS	NS	NS	NS	NS	NS	NS	NS	NS	NS	NS	NS	NS	NS	NS	NS	NS	NS	NS	NS	NS	NS	NS	NS	NS	NS	NS	NS	NS	NS	NS
coadread_mskcc	EV-034-M	NS	NS	NS	NS	NS	NS	NS	NS	NS	NS	NS	NS	NS	NS	NS	NS	NS	NS	NS	NS	NS	NS	NS	NS	NS	NS	NS	NS	NS	NS	NS	NS	NS	NS	NS	NS	NS	NS	NS	NS	NS	NS	NS	NS	NS	NS	NS	NS
coadread_mskcc	EV-034-P	NS	NS	NS	NS	NS	NS	NS	NS	NS	NS	NS	NS	NS	NS	NS	NS	NS	NS	NS	NS	NS	NS	NS	NS	NS	NS	NS	NS	NS	NS	NS	NS	NS	NS	NS	NS	NS	NS	NS	NS	NS	NS	NS	NS	NS	NS	NS	NS
coadread_mskcc	EV-035-M	NS	NS	NS	NS	NS	NS	NS	NS	NS	NS	NS	NS	NS	NS	NS	NS	NS	NS	NS	NS	NS	NS	NS	NS	NS	NS	NS	NS	NS	NS	NS	NS	NS	NS	NS	NS	NS	NS	NS	NS	NS	NS	NS	NS	NS	NS	NS	NS
coadread_mskcc	EV-035-P	NS	NS	NS	NS	NS	NS	NS	NS	NS	NS	NS	NS	NS	NS	NS	NS	NS	NS	NS	NS	NS	NS	NS	NS	NS	NS	NS	NS	NS	NS	NS	NS	NS	NS	NS	NS	NS	NS	NS	NS	NS	NS	NS	NS	NS	NS	NS	NS
coadread_mskcc	EV-036-M	NS	NS	NS	NS	NS	NS	NS	NS	NS	NS	NS	NS	NS	NS	NS	NS	NS	NS	NS	NS	NS	NS	NS	NS	NS	NS	NS	NS	NS	NS	NS	NS	NS	NS	NS	NS	NS	NS	NS	NS	NS	NS	NS	NS	NS	NS	NS	NS
coadread_mskcc	EV-036-P	NS	NS	NS	NS	NS	NS	NS	NS	NS	NS	NS	NS	NS	NS	NS	NS	NS	NS	NS	NS	NS	NS	NS	NS	NS	NS	NS	NS	NS	NS	NS	NS	NS	NS	NS	NS	NS	NS	NS	NS	NS	NS	NS	NS	NS	NS	NS	NS
coadread_mskcc	EV-037-M	NS	NS	NS	NS	NS	NS	NS	NS	NS	NS	NS	NS	NS	NS	NS	NS	NS	NS	NS	NS	NS	NS	NS	NS	NS	NS	NS	NS	NS	NS	NS	NS	NS	NS	NS	NS	NS	NS	NS	NS	NS	NS	NS	NS	NS	NS	NS	NS
coadread_mskcc	EV-037-P	NS	NS	NS	NS	NS	NS	NS	NS	NS	NS	NS	NS	NS	NS	NS	NS	NS	NS	NS	NS	NS	NS	NS	NS	NS	NS	NS	NS	NS	NS	NS	NS	NS	NS	NS	NS	NS	NS	NS	NS	NS	NS	NS	NS	NS	NS	NS	NS
coadread_mskcc	EV-038-M	NS	NS	NS	NS	NS	NS	NS	NS	NS	NS	NS	NS	NS	NS	NS	NS	NS	NS	NS	NS	NS	NS	NS	NS	NS	NS	NS	NS	NS	NS	NS	NS	NS	NS	NS	NS	NS	NS	NS	NS	NS	NS	NS	NS	NS	NS	NS	NS
coadread_mskcc	EV-038-P	NS	NS	NS	NS	NS	NS	NS	NS	NS	NS	NS	NS	NS	NS	NS	NS	NS	NS	NS	NS	NS	NS	NS	NS	NS	NS	NS	NS	NS	NS	NS	NS	NS	NS	NS	NS	NS	NS	NS	NS	NS	NS	NS	NS	NS	NS	NS	NS
coadread_mskcc	EV-040-M	NS	NS	NS	NS	NS	NS	NS	NS	NS	NS	NS	NS	NS	NS	NS	NS	NS	NS	NS	NS	NS	NS	NS	NS	NS	NS	NS	NS	NS	NS	NS	NS	NS	NS	NS	NS	NS	NS	NS	NS	NS	NS	NS	NS	NS	NS	NS	NS
coadread_mskcc	EV-040-P	NS	NS	NS	NS	NS	NS	NS	NS	NS	NS	NS	NS	NS	NS	NS	NS	NS	NS	NS	NS	NS	NS	NS	NS	NS	NS	NS	NS	NS	NS	NS	NS	NS	NS	NS	NS	NS	NS	NS	NS	NS	NS	NS	NS	NS	NS	NS	NS
coadread_mskcc	EV-041-M	NS	NS	NS	NS	NS	NS	NS	NS	NS	NS	NS	NS	NS	NS	NS	NS	NS	NS	NS	NS	NS	NS	NS	NS	NS	NS	NS	NS	NS	NS	NS	NS	NS	NS	NS	NS	NS	NS	NS	NS	NS	NS	NS	NS	NS	NS	NS	NS
coadread_mskcc	EV-041-P	NS	NS	NS	NS	NS	NS	NS	NS	NS	NS	NS	NS	NS	NS	NS	NS	NS	NS	NS	NS	NS	NS	NS	NS	NS	NS	NS	NS	NS	NS	NS	NS	NS	NS	NS	NS	NS	NS	NS	NS	NS	NS	NS	NS	NS	NS	NS	NS
coadread_mskcc	EV-042-M	NS	NS	NS	NS	NS	NS	NS	NS	NS	NS	NS	NS	NS	NS	NS	NS	NS	NS	NS	NS	NS	NS	NS	NS	NS	NS	NS	NS	NS	NS	NS	NS	NS	NS	NS	NS	NS	NS	NS	NS	NS	NS	NS	NS	NS	NS	NS	NS
coadread_mskcc	EV-042-P	NS	NS	NS	NS	NS	NS	NS	NS	NS	NS	NS	NS	NS	NS	NS	NS	NS	NS	NS	NS	NS	NS	NS	NS	NS	NS	NS	NS	NS	NS	NS	NS	NS	NS	NS	NS	NS	NS	NS	NS	NS	NS	NS	NS	NS	NS	NS	NS
coadread_mskcc	EV-043-M	NS	NS	NS	NS	NS	NS	NS	NS	NS	NS	NS	NS	NS	NS	NS	NS	NS	NS	NS	NS	NS	NS	NS	NS	NS	NS	NS	NS	NS	NS	NS	NS	NS	NS	NS	NS	NS	NS	NS	NS	NS	NS	NS	NS	NS	NS	NS	NS
coadread_mskcc	EV-043-P	NS	NS	NS	NS	NS	NS	NS	NS	NS	NS	NS	NS	NS	NS	NS	NS	NS	NS	NS	NS	NS	NS	NS	NS	NS	NS	NS	NS	NS	NS	NS	NS	NS	NS	NS	NS	NS	NS	NS	NS	NS	NS	NS	NS	NS	NS	NS	NS
coadread_mskcc	EV-044-M	NS	NS	NS	NS	NS	NS	NS	NS	NS	NS	NS	NS	NS	NS	NS	NS	NS	NS	NS	NS	NS	NS	NS	NS	NS	NS	NS	NS	NS	NS	NS	NS	NS	NS	NS	NS	NS	NS	NS	NS	NS	NS	NS	NS	NS	NS	NS	NS
coadread_dfci_2016	coadread_dfci_2016_2997	WT	WT	WT	WT	WT	WT	WT	WT	WT	WT	WT	WT	WT	WT	WT	WT	WT	WT	WT	WT	WT	WT	WT	WT	WT	WT	WT	WT	WT	WT	WT	WT	WT	WT	WT	WT	WT	WT	WT	WT	WT	WT	WT	WT	WT	WT	WT	WT
coadread_mskcc	EV-045-M	NS	NS	NS	NS	NS	NS	NS	NS	NS	NS	NS	NS	NS	NS	NS	NS	NS	NS	NS	NS	NS	NS	NS	NS	NS	NS	NS	NS	NS	NS	NS	NS	NS	NS	NS	NS	NS	NS	NS	NS	NS	NS	NS	NS	NS	NS	NS	NS
coadread_mskcc	EV-045-P	NS	NS	NS	NS	NS	NS	NS	NS	NS	NS	NS	NS	NS	NS	NS	NS	NS	NS	NS	NS	NS	NS	NS	NS	NS	NS	NS	NS	NS	NS	NS	NS	NS	NS	NS	NS	NS	NS	NS	NS	NS	NS	NS	NS	NS	NS	NS	NS
coadread_mskcc	EV-046-M	NS	NS	NS	NS	NS	NS	NS	NS	NS	NS	NS	NS	NS	NS	NS	NS	NS	NS	NS	NS	NS	NS	NS	NS	NS	NS	NS	NS	NS	NS	NS	NS	NS	NS	NS	NS	NS	NS	NS	NS	NS	NS	NS	NS	NS	NS	NS	NS
coadread_mskcc	EV-046-P	NS	NS	NS	NS	NS	NS	NS	NS	NS	NS	NS	NS	NS	NS	NS	NS	NS	NS	NS	NS	NS	NS	NS	NS	NS	NS	NS	NS	NS	NS	NS	NS	NS	NS	NS	NS	NS	NS	NS	NS	NS	NS	NS	NS	NS	NS	NS	NS
coadread_mskcc	EV-047-M	NS	NS	NS	NS	NS	NS	NS	NS	NS	NS	NS	NS	NS	NS	NS	NS	NS	NS	NS	NS	NS	NS	NS	NS	NS	NS	NS	NS	NS	NS	NS	NS	NS	NS	NS	NS	NS	NS	NS	NS	NS	NS	NS	NS	NS	NS	NS	NS
coadread_mskcc	EV-047-P	NS	NS	NS	NS	NS	NS	NS	NS	NS	NS	NS	NS	NS	NS	NS	NS	NS	NS	NS	NS	NS	NS	NS	NS	NS	NS	NS	NS	NS	NS	NS	NS	NS	NS	NS	NS	NS	NS	NS	NS	NS	NS	NS	NS	NS	NS	NS	NS
coadread_mskcc	EV-048-M	NS	NS	NS	NS	NS	NS	NS	NS	NS	NS	NS	NS	NS	NS	NS	NS	NS	NS	NS	NS	NS	NS	NS	NS	NS	NS	NS	NS	NS	NS	NS	NS	NS	NS	NS	NS	NS	NS	NS	NS	NS	NS	NS	NS	NS	NS	NS	NS
coadread_mskcc	EV-048-P	NS	NS	NS	NS	NS	NS	NS	NS	NS	NS	NS	NS	NS	NS	NS	NS	NS	NS	NS	NS	NS	NS	NS	NS	NS	NS	NS	NS	NS	NS	NS	NS	NS	NS	NS	NS	NS	NS	NS	NS	NS	NS	NS	NS	NS	NS	NS	NS
coadread_mskcc	EV-049-M	NS	NS	NS	NS	NS	NS	NS	NS	NS	NS	NS	NS	NS	NS	NS	NS	NS	NS	NS	NS	NS	NS	NS	NS	NS	NS	NS	NS	NS	NS	NS	NS	NS	NS	NS	NS	NS	NS	NS	NS	NS	NS	NS	NS	NS	NS	NS	NS
coadread_mskcc	EV-049-P	NS	NS	NS	NS	NS	NS	NS	NS	NS	NS	NS	NS	NS	NS	NS	NS	NS	NS	NS	NS	NS	NS	NS	NS	NS	NS	NS	NS	NS	NS	NS	NS	NS	NS	NS	NS	NS	NS	NS	NS	NS	NS	NS	NS	NS	NS	NS	NS
coadread_mskcc	EV-050-M	NS	NS	NS	NS	NS	NS	NS	NS	NS	NS	NS	NS	NS	NS	NS	NS	NS	NS	NS	NS	NS	NS	NS	NS	NS	NS	NS	NS	NS	NS	NS	NS	NS	NS	NS	NS	NS	NS	NS	NS	NS	NS	NS	NS	NS	NS	NS	NS
coadread_mskcc	EV-050-P	NS	NS	NS	NS	NS	NS	NS	NS	NS	NS	NS	NS	NS	NS	NS	NS	NS	NS	NS	NS	NS	NS	NS	NS	NS	NS	NS	NS	NS	NS	NS	NS	NS	NS	NS	NS	NS	NS	NS	NS	NS	NS	NS	NS	NS	NS	NS	NS
coadread_mskcc	EV-051-M	NS	NS	NS	NS	NS	NS	NS	NS	NS	NS	NS	NS	NS	NS	NS	NS	NS	NS	NS	NS	NS	NS	NS	NS	NS	NS	NS	NS	NS	NS	NS	NS	NS	NS	NS	NS	NS	NS	NS	NS	NS	NS	NS	NS	NS	NS	NS	NS
coadread_mskcc	EV-051-P	NS	NS	NS	NS	NS	NS	NS	NS	NS	NS	NS	NS	NS	NS	NS	NS	NS	NS	NS	NS	NS	NS	NS	NS	NS	NS	NS	NS	NS	NS	NS	NS	NS	NS	NS	NS	NS	NS	NS	NS	NS	NS	NS	NS	NS	NS	NS	NS
coadread_mskcc	EV-052-M	NS	NS	NS	NS	NS	NS	NS	NS	NS	NS	NS	NS	NS	NS	NS	NS	NS	NS	NS	NS	NS	NS	NS	NS	NS	NS	NS	NS	NS	NS	NS	NS	NS	NS	NS	NS	NS	NS	NS	NS	NS	NS	NS	NS	NS	NS	NS	NS
coadread_mskcc	EV-052-P	NS	NS	NS	NS	NS	NS	NS	NS	NS	NS	NS	NS	NS	NS	NS	NS	NS	NS	NS	NS	NS	NS	NS	NS	NS	NS	NS	NS	NS	NS	NS	NS	NS	NS	NS	NS	NS	NS	NS	NS	NS	NS	NS	NS	NS	NS	NS	NS
coadread_mskcc	EV-053-M	NS	NS	NS	NS	NS	NS	NS	NS	NS	NS	NS	NS	NS	NS	NS	NS	NS	NS	NS	NS	NS	NS	NS	NS	NS	NS	NS	NS	NS	NS	NS	NS	NS	NS	NS	NS	NS	NS	NS	NS	NS	NS	NS	NS	NS	NS	NS	NS
coadread_mskcc	EV-053-P	NS	NS	NS	NS	NS	NS	NS	NS	NS	NS	NS	NS	NS	NS	NS	NS	NS	NS	NS	NS	NS	NS	NS	NS	NS	NS	NS	NS	NS	NS	NS	NS	NS	NS	NS	NS	NS	NS	NS	NS	NS	NS	NS	NS	NS	NS	NS	NS
coadread_mskcc	EV-054-M	NS	NS	NS	NS	NS	NS	NS	NS	NS	NS	NS	NS	NS	NS	NS	NS	NS	NS	NS	NS	NS	NS	NS	NS	NS	NS	NS	NS	NS	NS	NS	NS	NS	NS	NS	NS	NS	NS	NS	NS	NS	NS	NS	NS	NS	NS	NS	NS
coadread_mskcc	EV-054-P	NS	NS	NS	NS	NS	NS	NS	NS	NS	NS	NS	NS	NS	NS	NS	NS	NS	NS	NS	NS	NS	NS	NS	NS	NS	NS	NS	NS	NS	NS	NS	NS	NS	NS	NS	NS	NS	NS	NS	NS	NS	NS	NS	NS	NS	NS	NS	NS
coadread_mskcc	EV-055-M	NS	NS	NS	NS	NS	NS	NS	NS	NS	NS	NS	NS	NS	NS	NS	NS	NS	NS	NS	NS	NS	NS	NS	NS	NS	NS	NS	NS	NS	NS	NS	NS	NS	NS	NS	NS	NS	NS	NS	NS	NS	NS	NS	NS	NS	NS	NS	NS
coadread_mskcc	EV-055-P	NS	NS	NS	NS	NS	NS	NS	NS	NS	NS	NS	NS	NS	NS	NS	NS	NS	NS	NS	NS	NS	NS	NS	NS	NS	NS	NS	NS	NS	NS	NS	NS	NS	NS	NS	NS	NS	NS	NS	NS	NS	NS	NS	NS	NS	NS	NS	NS
coadread_mskcc	EV-056-M	NS	NS	NS	NS	NS	NS	NS	NS	NS	NS	NS	NS	NS	NS	NS	NS	NS	NS	NS	NS	NS	NS	NS	NS	NS	NS	NS	NS	NS	NS	NS	NS	NS	NS	NS	NS	NS	NS	NS	NS	NS	NS	NS	NS	NS	NS	NS	NS
coadread_mskcc	EV-056-P	NS	NS	NS	NS	NS	NS	NS	NS	NS	NS	NS	NS	NS	NS	NS	NS	NS	NS	NS	NS	NS	NS	NS	NS	NS	NS	NS	NS	NS	NS	NS	NS	NS	NS	NS	NS	NS	NS	NS	NS	NS	NS	NS	NS	NS	NS	NS	NS
coadread_mskcc	EV-058-M	NS	NS	NS	NS	NS	NS	NS	NS	NS	NS	NS	NS	NS	NS	NS	NS	NS	NS	NS	NS	NS	NS	NS	NS	NS	NS	NS	NS	NS	NS	NS	NS	NS	NS	NS	NS	NS	NS	NS	NS	NS	NS	NS	NS	NS	NS	NS	NS
coadread_mskcc	EV-058-P	NS	NS	NS	NS	NS	NS	NS	NS	NS	NS	NS	NS	NS	NS	NS	NS	NS	NS	NS	NS	NS	NS	NS	NS	NS	NS	NS	NS	NS	NS	NS	NS	NS	NS	NS	NS	NS	NS	NS	NS	NS	NS	NS	NS	NS	NS	NS	NS
coadread_mskcc	EV-060-M	NS	NS	NS	NS	NS	NS	NS	NS	NS	NS	NS	NS	NS	NS	NS	NS	NS	NS	NS	NS	NS	NS	NS	NS	NS	NS	NS	NS	NS	NS	NS	NS	NS	NS	NS	NS	NS	NS	NS	NS	NS	NS	NS	NS	NS	NS	NS	NS
coadread_mskcc	EV-060-P	NS	NS	NS	NS	NS	NS	NS	NS	NS	NS	NS	NS	NS	NS	NS	NS	NS	NS	NS	NS	NS	NS	NS	NS	NS	NS	NS	NS	NS	NS	NS	NS	NS	NS	NS	NS	NS	NS	NS	NS	NS	NS	NS	NS	NS	NS	NS	NS
coadread_mskcc	EV-061-M	NS	NS	NS	NS	NS	NS	NS	NS	NS	NS	NS	NS	NS	NS	NS	NS	NS	NS	NS	NS	NS	NS	NS	NS	NS	NS	NS	NS	NS	NS	NS	NS	NS	NS	NS	NS	NS	NS	NS	NS	NS	NS	NS	NS	NS	NS	NS	NS
coadread_mskcc	EV-061-P	NS	NS	NS	NS	NS	NS	NS	NS	NS	NS	NS	NS	NS	NS	NS	NS	NS	NS	NS	NS	NS	NS	NS	NS	NS	NS	NS	NS	NS	NS	NS	NS	NS	NS	NS	NS	NS	NS	NS	NS	NS	NS	NS	NS	NS	NS	NS	NS
coadread_mskcc	EV-062-M	NS	NS	NS	NS	NS	NS	NS	NS	NS	NS	NS	NS	NS	NS	NS	NS	NS	NS	NS	NS	NS	NS	NS	NS	NS	NS	NS	NS	NS	NS	NS	NS	NS	NS	NS	NS	NS	NS	NS	NS	NS	NS	NS	NS	NS	NS	NS	NS
coadread_mskcc	EV-062-P	NS	NS	NS	NS	NS	NS	NS	NS	NS	NS	NS	NS	NS	NS	NS	NS	NS	NS	NS	NS	NS	NS	NS	NS	NS	NS	NS	NS	NS	NS	NS	NS	NS	NS	NS	NS	NS	NS	NS	NS	NS	NS	NS	NS	NS	NS	NS	NS
coadread_mskcc	EV-063-M	NS	NS	NS	NS	NS	NS	NS	NS	NS	NS	NS	NS	NS	NS	NS	NS	NS	NS	NS	NS	NS	NS	NS	NS	NS	NS	NS	NS	NS	NS	NS	NS	NS	NS	NS	NS	NS	NS	NS	NS	NS	NS	NS	NS	NS	NS	NS	NS
coadread_mskcc	EV-063-P	NS	NS	NS	NS	NS	NS	NS	NS	NS	NS	NS	NS	NS	NS	NS	NS	NS	NS	NS	NS	NS	NS	NS	NS	NS	NS	NS	NS	NS	NS	NS	NS	NS	NS	NS	NS	NS	NS	NS	NS	NS	NS	NS	NS	NS	NS	NS	NS
coadread_mskcc	EV-064-M	NS	NS	NS	NS	NS	NS	NS	NS	NS	NS	NS	NS	NS	NS	NS	NS	NS	NS	NS	NS	NS	NS	NS	NS	NS	NS	NS	NS	NS	NS	NS	NS	NS	NS	NS	NS	NS	NS	NS	NS	NS	NS	NS	NS	NS	NS	NS	NS
coadread_mskcc	EV-064-P	NS	NS	NS	NS	NS	NS	NS	NS	NS	NS	NS	NS	NS	NS	NS	NS	NS	NS	NS	NS	NS	NS	NS	NS	NS	NS	NS	NS	NS	NS	NS	NS	NS	NS	NS	NS	NS	NS	NS	NS	NS	NS	NS	NS	NS	NS	NS	NS
coadread_mskcc	EV-066-M	NS	NS	NS	NS	NS	NS	NS	NS	NS	NS	NS	NS	NS	NS	NS	NS	NS	NS	NS	NS	NS	NS	NS	NS	NS	NS	NS	NS	NS	NS	NS	NS	NS	NS	NS	NS	NS	NS	NS	NS	NS	NS	NS	NS	NS	NS	NS	NS
coadread_mskcc	EV-066-P	NS	NS	NS	NS	NS	NS	NS	NS	NS	NS	NS	NS	NS	NS	NS	NS	NS	NS	NS	NS	NS	NS	NS	NS	NS	NS	NS	NS	NS	NS	NS	NS	NS	NS	NS	NS	NS	NS	NS	NS	NS	NS	NS	NS	NS	NS	NS	NS
coadread_mskcc	EV-067-M	NS	NS	NS	NS	NS	NS	NS	NS	NS	NS	NS	NS	NS	NS	NS	NS	NS	NS	NS	NS	NS	NS	NS	NS	NS	NS	NS	NS	NS	NS	NS	NS	NS	NS	NS	NS	NS	NS	NS	NS	NS	NS	NS	NS	NS	NS	NS	NS
coadread_mskcc	EV-067-P	NS	NS	NS	NS	NS	NS	NS	NS	NS	NS	NS	NS	NS	NS	NS	NS	NS	NS	NS	NS	NS	NS	NS	NS	NS	NS	NS	NS	NS	NS	NS	NS	NS	NS	NS	NS	NS	NS	NS	NS	NS	NS	NS	NS	NS	NS	NS	NS
coadread_mskcc	EV-068-M	NS	NS	NS	NS	NS	NS	NS	NS	NS	NS	NS	NS	NS	NS	NS	NS	NS	NS	NS	NS	NS	NS	NS	NS	NS	NS	NS	NS	NS	NS	NS	NS	NS	NS	NS	NS	NS	NS	NS	NS	NS	NS	NS	NS	NS	NS	NS	NS
coadread_mskcc	EV-068-P	NS	NS	NS	NS	NS	NS	NS	NS	NS	NS	NS	NS	NS	NS	NS	NS	NS	NS	NS	NS	NS	NS	NS	NS	NS	NS	NS	NS	NS	NS	NS	NS	NS	NS	NS	NS	NS	NS	NS	NS	NS	NS	NS	NS	NS	NS	NS	NS
coadread_mskcc	EV-069-M	NS	NS	NS	NS	NS	NS	NS	NS	NS	NS	NS	NS	NS	NS	NS	NS	NS	NS	NS	NS	NS	NS	NS	NS	NS	NS	NS	NS	NS	NS	NS	NS	NS	NS	NS	NS	NS	NS	NS	NS	NS	NS	NS	NS	NS	NS	NS	NS
coadread_mskcc	EV-069-P	NS	NS	NS	NS	NS	NS	NS	NS	NS	NS	NS	NS	NS	NS	NS	NS	NS	NS	NS	NS	NS	NS	NS	NS	NS	NS	NS	NS	NS	NS	NS	NS	NS	NS	NS	NS	NS	NS	NS	NS	NS	NS	NS	NS	NS	NS	NS	NS
coadread_mskcc	EV-070-M	NS	NS	NS	NS	NS	NS	NS	NS	NS	NS	NS	NS	NS	NS	NS	NS	NS	NS	NS	NS	NS	NS	NS	NS	NS	NS	NS	NS	NS	NS	NS	NS	NS	NS	NS	NS	NS	NS	NS	NS	NS	NS	NS	NS	NS	NS	NS	NS
coadread_mskcc	EV-070-P	NS	NS	NS	NS	NS	NS	NS	NS	NS	NS	NS	NS	NS	NS	NS	NS	NS	NS	NS	NS	NS	NS	NS	NS	NS	NS	NS	NS	NS	NS	NS	NS	NS	NS	NS	NS	NS	NS	NS	NS	NS	NS	NS	NS	NS	NS	NS	NS
coadread_mskcc	EV-071-M	NS	NS	NS	NS	NS	NS	NS	NS	NS	NS	NS	NS	NS	NS	NS	NS	NS	NS	NS	NS	NS	NS	NS	NS	NS	NS	NS	NS	NS	NS	NS	NS	NS	NS	NS	NS	NS	NS	NS	NS	NS	NS	NS	NS	NS	NS	NS	NS
coadread_mskcc	EV-071-P	NS	NS	NS	NS	NS	NS	NS	NS	NS	NS	NS	NS	NS	NS	NS	NS	NS	NS	NS	NS	NS	NS	NS	NS	NS	NS	NS	NS	NS	NS	NS	NS	NS	NS	NS	NS	NS	NS	NS	NS	NS	NS	NS	NS	NS	NS	NS	NS
coadread_mskcc	EV-072-M	NS	NS	NS	NS	NS	NS	NS	NS	NS	NS	NS	NS	NS	NS	NS	NS	NS	NS	NS	NS	NS	NS	NS	NS	NS	NS	NS	NS	NS	NS	NS	NS	NS	NS	NS	NS	NS	NS	NS	NS	NS	NS	NS	NS	NS	NS	NS	NS
coadread_mskcc	EV-072-P	NS	NS	NS	NS	NS	NS	NS	NS	NS	NS	NS	NS	NS	NS	NS	NS	NS	NS	NS	NS	NS	NS	NS	NS	NS	NS	NS	NS	NS	NS	NS	NS	NS	NS	NS	NS	NS	NS	NS	NS	NS	NS	NS	NS	NS	NS	NS	NS
coadread_mskcc	EV-073-M	NS	NS	NS	NS	NS	NS	NS	NS	NS	NS	NS	NS	NS	NS	NS	NS	NS	NS	NS	NS	NS	NS	NS	NS	NS	NS	NS	NS	NS	NS	NS	NS	NS	NS	NS	NS	NS	NS	NS	NS	NS	NS	NS	NS	NS	NS	NS	NS
coadread_mskcc	EV-073-P	NS	NS	NS	NS	NS	NS	NS	NS	NS	NS	NS	NS	NS	NS	NS	NS	NS	NS	NS	NS	NS	NS	NS	NS	NS	NS	NS	NS	NS	NS	NS	NS	NS	NS	NS	NS	NS	NS	NS	NS	NS	NS	NS	NS	NS	NS	NS	NS
coadread_mskcc	EV-074-M	NS	NS	NS	NS	NS	NS	NS	NS	NS	NS	NS	NS	NS	NS	NS	NS	NS	NS	NS	NS	NS	NS	NS	NS	NS	NS	NS	NS	NS	NS	NS	NS	NS	NS	NS	NS	NS	NS	NS	NS	NS	NS	NS	NS	NS	NS	NS	NS
coadread_mskcc	EV-074-P	NS	NS	NS	NS	NS	NS	NS	NS	NS	NS	NS	NS	NS	NS	NS	NS	NS	NS	NS	NS	NS	NS	NS	NS	NS	NS	NS	NS	NS	NS	NS	NS	NS	NS	NS	NS	NS	NS	NS	NS	NS	NS	NS	NS	NS	NS	NS	NS
coadread_mskcc	EV-075-M	NS	NS	NS	NS	NS	NS	NS	NS	NS	NS	NS	NS	NS	NS	NS	NS	NS	NS	NS	NS	NS	NS	NS	NS	NS	NS	NS	NS	NS	NS	NS	NS	NS	NS	NS	NS	NS	NS	NS	NS	NS	NS	NS	NS	NS	NS	NS	NS
coadread_mskcc	EV-075-P	NS	NS	NS	NS	NS	NS	NS	NS	NS	NS	NS	NS	NS	NS	NS	NS	NS	NS	NS	NS	NS	NS	NS	NS	NS	NS	NS	NS	NS	NS	NS	NS	NS	NS	NS	NS	NS	NS	NS	NS	NS	NS	NS	NS	NS	NS	NS	NS
coadread_mskcc	EV-076-M	NS	NS	NS	NS	NS	NS	NS	NS	NS	NS	NS	NS	NS	NS	NS	NS	NS	NS	NS	NS	NS	NS	NS	NS	NS	NS	NS	NS	NS	NS	NS	NS	NS	NS	NS	NS	NS	NS	NS	NS	NS	NS	NS	NS	NS	NS	NS	NS
coadread_mskcc	EV-076-P	NS	NS	NS	NS	NS	NS	NS	NS	NS	NS	NS	NS	NS	NS	NS	NS	NS	NS	NS	NS	NS	NS	NS	NS	NS	NS	NS	NS	NS	NS	NS	NS	NS	NS	NS	NS	NS	NS	NS	NS	NS	NS	NS	NS	NS	NS	NS	NS
[truncated: 127 more columns]
